# Supplementary material for: Mechanisms of PP2A-Ankle2 dependent nuclear reassembly after mitosis
Source: bioRxiv preprint, doi:10.1101/2024.10.07.617051, version 3 (2024-12-03)
Supplement: Supplementary Table 4 [file 617051_file05.xlsx]

## Sheet: Sheet1
Protein name	Accession Number	Alternate Ids	Molecular Weight	GFP Unique Peptides	GFP Total Spectrum Count	PP2A-29B-GFP Unique Peptides	PP2A-29B-GFP Total Spectrum Count
Serine/threonine-protein phosphatase PP2A 65 kDa regulatory subunit OS=Drosophila melanogaster OX=7227 GN=Pp2A-29B PE=2 SV=4	P36179 (+3)	Pp2A-29B	65 kDa	0		737	134
Serine/threonine-protein phosphatase PP2A OS=Drosophila melanogaster OX=7227 GN=mts PE=2 SV=1	P23696 (+1)	mts	35 kDa	0		429	72
Heat shock protein cognate 4, isoform G OS=Drosophila melanogaster OX=7227 GN=Hsc70-4 PE=1 SV=1	C7LA75 (+1)	Hsc70-4	71 kDa	24	16	276	63
Serine/threonine-protein phosphatase 2A 55 kDa regulatory subunit B OS=Drosophila melanogaster OX=7227 GN=tws PE=1 SV=1	A0A0B4LGZ3 (+1)	tws	57 kDa	0		345	71
Serine/threonine-protein phosphatase 2A 55 kDa regulatory subunit B OS=Drosophila melanogaster OX=7227 GN=tws-RB PE=2 SV=1	C8VV30	tws-RB	51 kDa	0		334	1
Serine/threonine-protein phosphatase alpha-2 isoform OS=Drosophila melanogaster OX=7227 GN=Pp1-87B PE=1 SV=1	P12982	Pp1-87B	35 kDa	0		12	6
Vitellogenin-1 OS=Drosophila melanogaster OX=7227 GN=Yp1 PE=1 SV=1	P02843 (+2)	Yp1	49 kDa	35	13	168	45
Vitellogenin-2 OS=Drosophila melanogaster OX=7227 GN=Yp2 PE=1 SV=2	P02844 (+1)	Yp2	50 kDa	41	11	111	33
Heat shock protein 83, isoform B OS=Drosophila melanogaster OX=7227 GN=Hsp83 PE=3 SV=1	M9PBL3 (+1)	Hsp83	82 kDa	25	7	180	56
Trailer hitch, isoform C OS=Drosophila melanogaster OX=7227 GN=tral PE=1 SV=1	M9PF14 (+1)	tral	70 kDa	9	5	153	40
Trailer hitch, isoform F OS=Drosophila melanogaster OX=7227 GN=tral PE=1 SV=1	M9PI44 (+1)	tral	69 kDa	0		152	1
Serine/threonine protein phosphatase 2A regulatory subunit OS=Drosophila melanogaster OX=7227 GN=wdb PE=1 SV=2	Q9VB23	wdb	60 kDa	0		182	41
SD21251p OS=Drosophila melanogaster OX=7227 GN=sesB-RD PE=2 SV=1	D1Z385 (+2)	sesB-RD	34 kDa	7	5	158	32
Putative elongator complex protein 4 OS=Drosophila melanogaster OX=7227 GN=CG6907 PE=1 SV=1	Q9VMQ7 (+1)	CG6907	49 kDa	0		177	34
Heat shock 70-kDa protein cognate 3, isoform E OS=Drosophila melanogaster OX=7227 GN=Hsc70-3 PE=1 SV=1	F3YDH0 (+1)	Hsc70-3	72 kDa	7	5	121	31
Yolk protein 3, isoform B OS=Drosophila melanogaster OX=7227 GN=Yp3 PE=1 SV=1	X2JEX8	Yp3	46 kDa	27	10	92	26
Anon-i1 protein OS=Drosophila melanogaster OX=7227 GN=Dmel\CG2034 PE=1 SV=1	Q24050	Dmel	29 kDa	0		158	28
FI04457p OS=Drosophila melanogaster OX=7227 GN=GCC185 PE=1 SV=3	Q9VGE4	GCC185	130 kDa	26	22	60	42
Purity of essence, isoform B OS=Drosophila melanogaster OX=7227 GN=poe PE=4 SV=1	M9PB68 (+1)	poe	591 kDa	0		136	85
Putative vitellogenin receptor OS=Drosophila melanogaster OX=7227 GN=yl PE=1 SV=2	P98163	yl	220 kDa	4	4	111	56
Spinophilin, isoform B OS=Drosophila melanogaster OX=7227 GN=Spn PE=1 SV=1	M9NEY3 (+2)	Spn	232 kDa	0		0
Tubulin beta-1 chain OS=Drosophila melanogaster OX=7227 GN=betaTub56D PE=1 SV=2	Q24560	betaTub56D	50 kDa	5	2	101	27
LD30155p OS=Drosophila melanogaster OX=7227 GN=lost PE=1 SV=1	Q9VN21	lost	60 kDa	8	5	76	32
Heat shock protein 26 OS=Drosophila melanogaster OX=7227 GN=Hsp26 PE=1 SV=2	P02517 (+1)	Hsp26	23 kDa	0		96	24
Jabba, isoform B OS=Drosophila melanogaster OX=7227 GN=Jabba PE=1 SV=1	Q7K1Q6	Jabba	36 kDa	0		97	1
CG42351-PI OS=Drosophila melanogaster OX=7227 PE=2 SV=1	K4GUH7		46 kDa	1	1	90	21
Cup, isoform C OS=Drosophila melanogaster OX=7227 GN=cup PE=4 SV=1	X2J9P9	cup	126 kDa	2	2	72	33
CAD protein OS=Drosophila melanogaster OX=7227 GN=r PE=1 SV=3	P05990 (+1)	r	247 kDa	0		86	57
Serine/threonine-protein phosphatase 4 catalytic subunit OS=Drosophila melanogaster OX=7227 GN=Pp4-19C PE=2 SV=1	O76932 (+1)	Pp4-19C	35 kDa	0		86	7
AT31406p (Fragment) OS=Drosophila melanogaster OX=7227 GN=CG13994 PE=2 SV=1	Q7JYN8 (+1)	CG13994	18 kDa	0		0
Elongation factor 2 OS=Drosophila melanogaster OX=7227 GN=EF2 PE=1 SV=4	P13060	EF2	94 kDa	0		83	38
FI12105p OS=Drosophila melanogaster OX=7227 PE=2 SV=1	C9QPB0 (+2)		62 kDa	0		80	32
Apolipophorin, isoform B OS=Drosophila melanogaster OX=7227 GN=apolpp PE=1 SV=1	L0MPS3 (+1)	apolpp	373 kDa	1	1	74	56
Kinesin heavy chain OS=Drosophila melanogaster OX=7227 GN=Khc PE=1 SV=2	P17210	Khc	110 kDa	0		72	45
DID OS=Drosophila melanogaster OX=7227 GN=poly PE=2 SV=1	Q9NH01	poly	28 kDa	0		71	22
Heat shock protein 27 OS=Drosophila melanogaster OX=7227 GN=Hsp27 PE=1 SV=2	P02518 (+1)	Hsp27	24 kDa	0		58	18
Serine/threonine-protein phosphatase OS=Drosophila melanogaster OX=7227 GN=flw PE=1 SV=1	Q8T0U6	flw	51 kDa	0		4	1
Clathrin heavy chain OS=Drosophila melanogaster OX=7227 GN=Chc PE=1 SV=1	P29742 (+1)	Chc	191 kDa	0		68	45
Telomere-associated protein RIF1 OS=Drosophila melanogaster OX=7227 GN=Rif1 PE=1 SV=1	Q9XZ34	Rif1	157 kDa	0		22	18
60S ribosomal protein L22 OS=Drosophila melanogaster OX=7227 GN=RpL22 PE=1 SV=2	P50887	RpL22	31 kDa	8	6	35	19
Tubulin beta-2 chain OS=Drosophila melanogaster OX=7227 GN=betaTub85D PE=1 SV=1	P61857	betaTub85D	50 kDa	0		58	1
Cullin-associated and neddylation-dissociated 1, isoform B OS=Drosophila melanogaster OX=7227 GN=Cand1 PE=1 SV=1	M9PB90 (+1)	Cand1	139 kDa	0		63	34
Serine/threonine-protein phosphatase 4 regulatory subunit 2 OS=Drosophila melanogaster OX=7227 GN=PPP4R2r PE=1 SV=2	Q9W2U4	PPP4R2r	67 kDa	0		62	31
Elongation factor 1-alpha 1 OS=Drosophila melanogaster OX=7227 GN=eEF1alpha1 PE=1 SV=2	P08736	eEF1alpha1	50 kDa	7	5	41	17
Transitional endoplasmic reticulum ATPase TER94 OS=Drosophila melanogaster OX=7227 GN=TER94 PE=1 SV=1	Q7KN62	TER94	89 kDa	4	2	54	34
GH07711p OS=Drosophila melanogaster OX=7227 GN=sds22 PE=1 SV=1	Q9VEK8	sds22	38 kDa	0		0
60S ribosomal protein L4 OS=Drosophila melanogaster OX=7227 GN=RpL4 PE=1 SV=2	P09180	RpL4	45 kDa	9	7	30	22
Meiotic from via salaria 332, isoform B OS=Drosophila melanogaster OX=7227 GN=mei-S332 PE=4 SV=1	A0A0B4LG47 (+1)	mei-S332	44 kDa	0		59	24
Dynein heavy chain 64C, isoform I OS=Drosophila melanogaster OX=7227 GN=Dhc64C PE=1 SV=1	M9PBQ3 (+3)	Dhc64C	533 kDa	0		58	46
Eukaryotic translation initiation factor 3 subunit A OS=Drosophila melanogaster OX=7227 GN=eIF3a PE=1 SV=1	Q9VN25	eIF3a	134 kDa	0		58	35
DnaJ-like-2, isoform A OS=Drosophila melanogaster OX=7227 GN=Droj2 PE=1 SV=1	Q9VFV9	Droj2	45 kDa	0		52	23
Tubulin alpha-1 chain OS=Drosophila melanogaster OX=7227 GN=alphaTub84B PE=1 SV=1	P06603 (+1)	alphaTub84B	50 kDa	3	3	48	23
ATP-dependent RNA helicase me31b OS=Drosophila melanogaster OX=7227 GN=me31B PE=1 SV=3	P23128	me31B	52 kDa	2	2	47	20
E3 SUMO-protein ligase RanBP2 OS=Drosophila melanogaster OX=7227 GN=Nup358 PE=1 SV=1	A0A0B4K7J2	Nup358	299 kDa	1	1	55	35
Connector of kinase to AP-1, isoform E OS=Drosophila melanogaster OX=7227 GN=Cka PE=1 SV=1	D3DML3 (+3)	Cka	80 kDa	0		56	23
Bifunctional glutamate/proline--tRNA ligase OS=Drosophila melanogaster OX=7227 GN=GluProRS PE=1 SV=2	P28668	GluProRS	189 kDa	0		55	40
LP06614p (Fragment) OS=Drosophila melanogaster OX=7227 GN=RpLP2-RB PE=2 SV=1	B7FNN6 (+1)	RpLP2-RB	14 kDa	32	2	6	3
LD18929p OS=Drosophila melanogaster OX=7227 GN=asp-RA PE=2 SV=1	B8A3X9 (+2)	asp-RA	230 kDa	0		53	39
Calmodulin, isoform C OS=Drosophila melanogaster OX=7227 GN=Cam PE=1 SV=1	A0A0B4LF57 (+2)	Cam	17 kDa	2	2	40	12
ATP synthase subunit alpha, mitochondrial OS=Drosophila melanogaster OX=7227 GN=blw PE=1 SV=2	P35381	blw	59 kDa	1	1	47	22
Glucosidase 2 beta subunit, isoform A OS=Drosophila melanogaster OX=7227 GN=GCS2beta PE=1 SV=1	Q9VJD1	GCS2beta	62 kDa	0		52	25
26S proteasome non-ATPase regulatory subunit 2 OS=Drosophila melanogaster OX=7227 GN=Rpn1 PE=1 SV=2	Q9VW54	Rpn1	102 kDa	0		52	23
Elongation factor 1-alpha OS=Drosophila melanogaster OX=7227 GN=eEF1alpha2 PE=1 SV=1	A4V3Q6 (+1)	eEF1alpha2	51 kDa	0		34	2
60S ribosomal protein L8 OS=Drosophila melanogaster OX=7227 GN=RpL8 PE=1 SV=1	Q9V3G1	RpL8	28 kDa	7	5	31	12
26S proteasome regulatory complex subunit p48B OS=Drosophila melanogaster OX=7227 GN=Rpt1 PE=1 SV=1	Q7KMQ0	Rpt1	49 kDa	0		49	26
Tantalus, isoform B OS=Drosophila melanogaster OX=7227 GN=tant PE=4 SV=1	M9PEG8 (+1)	tant	34 kDa	0		51	15
Actin-5C OS=Drosophila melanogaster OX=7227 GN=Act5C PE=1 SV=4	P10987 (+1)	Act5C	42 kDa	5	3	37	18
Integrator complex subunit 1 OS=Drosophila melanogaster OX=7227 GN=IntS1 PE=1 SV=2	Q9W1C5	IntS1	235 kDa	0		50	34
GH14730p (Fragment) OS=Drosophila melanogaster OX=7227 GN=CG17494-RB PE=2 SV=1	B5RJH6 (+1)	CG17494-RB	104 kDa	0		49	30
Uncharacterized protein, isoform A OS=Drosophila melanogaster OX=7227 GN=Dmel\CG17514 PE=1 SV=2	Q7PLL6	Dmel	294 kDa	0		49	37
60S ribosomal protein L7a OS=Drosophila melanogaster OX=7227 GN=RpL7A PE=1 SV=2	P46223 (+1)	RpL7A	31 kDa	5	5	26	11
Uncharacterized protein, isoform F OS=Drosophila melanogaster OX=7227 GN=huwe1 PE=1 SV=1	X2JKH9	huwe1	555 kDa	0		6	6
Serine/threonine-protein phosphatase Pgam5, mitochondrial OS=Drosophila melanogaster OX=7227 GN=Pgam5 PE=1 SV=1	O46084	Pgam5	33 kDa	0		48	18
IP17216p (Fragment) OS=Drosophila melanogaster OX=7227 GN=RpL23a PE=2 SV=1	A1A6X4 (+2)	RpL23a	29 kDa	3	2	29	14
IP15838p (Fragment) OS=Drosophila melanogaster OX=7227 PE=2 SV=1	Q29QY2 (+2)		28 kDa	0		45	20
LD13662p OS=Drosophila melanogaster OX=7227 GN=RpS9 PE=1 SV=1	C6SUW3 (+1)	RpS9	23 kDa	3	3	29	16
Heterochromatin protein 1 OS=Drosophila melanogaster OX=7227 GN=Su(var)205 PE=1 SV=2	P05205	Su	23 kDa	13	2	23	11
Cullin homolog 1 OS=Drosophila melanogaster OX=7227 GN=Cul1 PE=1 SV=2	Q24311	Cul1	90 kDa	0		46	28
Proteasome-associated protein ECM29 homolog OS=Drosophila melanogaster OX=7227 GN=CG8858 PE=1 SV=1	Q9V677	CG8858	212 kDa	0		46	35
Integrator complex subunit 6 OS=Drosophila melanogaster OX=7227 GN=IntS6 PE=1 SV=2	Q9W485	IntS6	137 kDa	0		46	27
60S ribosomal protein L13 OS=Drosophila melanogaster OX=7227 GN=RpL13 PE=1 SV=1	M9PFF0 (+1)	RpL13	25 kDa	5	4	23	13
Survival motor neuron protein OS=Drosophila melanogaster OX=7227 GN=Smn PE=1 SV=1	Q9VV74	Smn	25 kDa	26	4	8	3
Fat facets, isoform E OS=Drosophila melanogaster OX=7227 GN=faf PE=3 SV=1	A0A0B4K6W2 (+2)	faf	310 kDa	0		44	33
Elongator complex protein 1 OS=Drosophila melanogaster OX=7227 GN=Elp1 PE=1 SV=1	A0A0B4KFR6 (+2)	Elp1	143 kDa	0		44	32
40S ribosomal protein S8 OS=Drosophila melanogaster OX=7227 GN=RpS8 PE=3 SV=1	A0A0B4K6N1 (+1)	RpS8	24 kDa	6	5	26	14
Chaperonin containing TCP1 subunit 6 OS=Drosophila melanogaster OX=7227 GN=CCT6 PE=1 SV=1	Q9VXQ5	CCT6	58 kDa	0		39	22
26S proteasome non-ATPase regulatory subunit 1 OS=Drosophila melanogaster OX=7227 GN=Rpn2 PE=3 SV=1	A0A0B4KHE9 (+2)	Rpn2	113 kDa	0		43	29
Coatomer subunit alpha OS=Drosophila melanogaster OX=7227 GN=alphaCOP PE=1 SV=1	Q9W0B8 (+1)	alphaCOP	139 kDa	0		43	27
Actin 87E, isoform C OS=Drosophila melanogaster OX=7227 GN=Act87E PE=3 SV=1	A0A0B4LH50 (+6)	Act87E	42 kDa	0		34	1
Eukaryotic translation initiation factor 4G1, isoform B OS=Drosophila melanogaster OX=7227 GN=eIF4G1 PE=1 SV=1	A8DZ29 (+1)	eIF4G1	211 kDa	1	1	38	28
DNA replication licensing factor Mcm7 OS=Drosophila melanogaster OX=7227 GN=Mcm7 PE=1 SV=1	Q9XYU0	Mcm7	81 kDa	0		41	24
Nucleosome assembly protein NAP-1 OS=Drosophila melanogaster OX=7227 GN=Nap1 PE=1 SV=1	Q24150 (+1)	Nap1	43 kDa	0		42	16
Phosphoglycerate mutase 5, isoform B OS=Drosophila melanogaster OX=7227 GN=Pgam5 PE=4 SV=1	X2JC94	Pgam5	33 kDa	0		42	1
40S ribosomal protein S3a OS=Drosophila melanogaster OX=7227 GN=RpS3A PE=1 SV=4	P55830	RpS3A	30 kDa	2	2	24	13
T-complex protein 1 subunit gamma OS=Drosophila melanogaster OX=7227 GN=CCT3 PE=1 SV=1	A4V303 (+1)	CCT3	59 kDa	0		37	26
Chaperonin containing TCP1 subunit 2 OS=Drosophila melanogaster OX=7227 GN=CCT2 PE=1 SV=2	Q9W392	CCT2	58 kDa	0		37	20
Mitochondrial trifunctional protein alpha subunit, isoform B OS=Drosophila melanogaster OX=7227 GN=Mtpalpha PE=1 SV=1	Q8IPE8 (+1)	Mtpalpha	80 kDa	0		39	22
Transcription-associated protein 1 OS=Drosophila melanogaster OX=7227 GN=Nipped-A PE=1 SV=4	Q8I8U7	Nipped-A	435 kDa	0		41	26
Eukaryotic translation initiation factor 3 subunit C OS=Drosophila melanogaster OX=7227 GN=eIF3c PE=3 SV=1	A0A0B4LFL2 (+1)	eIF3c	106 kDa	2	1	38	24
Inhibitor-2 OS=Drosophila melanogaster OX=7227 GN=I-2 PE=1 SV=1	Q9V3C7	I-2	23 kDa	0		0
Nuclear pore complex protein Nup205 OS=Drosophila melanogaster OX=7227 GN=Nup205 PE=2 SV=1	Q8IQV9	Nup205	235 kDa	0		37	27
CG16916 protein OS=Drosophila melanogaster OX=7227 GN=CG16916 PE=3 SV=1	E1UIA5 (+1)	CG16916	47 kDa	2	1	37	18
26S proteasome regulatory subunit 4 OS=Drosophila melanogaster OX=7227 GN=Rpt2 PE=1 SV=2	P48601 (+1)	Rpt2	49 kDa	0		39	23
HDC06595 OS=Drosophila melanogaster OX=7227 GN=HDC06595 PE=4 SV=1	|#DECOY#Q6IGD4|Q6IGD4_DROME-DECOY		?	0	0	0
Pyruvate kinase OS=Drosophila melanogaster OX=7227 GN=PyK PE=2 SV=2	O62619	PyK	57 kDa	0		38	20
Integrator complex subunit 9 OS=Drosophila melanogaster OX=7227 GN=IntS9 PE=1 SV=1	Q95TS5	IntS9	73 kDa	0		38	19
Probable elongator complex protein 3 OS=Drosophila melanogaster OX=7227 GN=Elp3 PE=2 SV=1	Q9VQZ6	Elp3	63 kDa	0		38	26
60S acidic ribosomal protein P0 OS=Drosophila melanogaster OX=7227 GN=RpLP0 PE=1 SV=1	P19889	RpLP0	34 kDa	8	3	26	13
T-complex protein 1 subunit eta OS=Drosophila melanogaster OX=7227 GN=CCT7 PE=1 SV=2	Q9VHL2	CCT7	59 kDa	0		36	25
AT04852p OS=Drosophila melanogaster OX=7227 GN=eIF-4a-RD PE=2 SV=1	C8VV33 (+3)	eIF-4a-RD	44 kDa	0		37	21
BcDNA.GH04962 OS=Drosophila melanogaster OX=7227 GN=GCS2alpha PE=1 SV=1	Q7KMM4	GCS2alpha	106 kDa	0		37	27
Kinesin light chain, isoform B OS=Drosophila melanogaster OX=7227 GN=Klc PE=4 SV=1	M9PF24 (+1)	Klc	58 kDa	0		36	24
Probable isocitrate dehydrogenase [NAD] subunit alpha, mitochondrial OS=Drosophila melanogaster OX=7227 GN=l(1)G0156 PE=2 SV=1	Q9VWH4	l	41 kDa	0		36	19
Ubiquitin-like modifier-activating enzyme 5 OS=Drosophila melanogaster OX=7227 GN=Uba5 PE=2 SV=1	Q9VYY3 (+1)	Uba5	44 kDa	7	5	11	7
60S ribosomal protein L19 OS=Drosophila melanogaster OX=7227 GN=RpL19 PE=1 SV=2	P36241	RpL19	24 kDa	5	3	20	10
CCHC-type zinc finger nucleic acid binding protein, isoform B OS=Drosophila melanogaster OX=7227 GN=CNBP PE=2 SV=1	A0A0B4JD46 (+1)	CNBP	18 kDa	1	1	33	12
Chaperonin containing TCP1 subunit 1, isoform B OS=Drosophila melanogaster OX=7227 GN=CCT1 PE=1 SV=1	A4V391 (+1)	CCT1	60 kDa	0		32	20
FI21109p1 OS=Drosophila melanogaster OX=7227 GN=bel-RB PE=2 SV=1	M9W6J0 (+1)	bel-RB	85 kDa	6	2	29	23
26S proteasome regulatory subunit 8 OS=Drosophila melanogaster OX=7227 GN=Rpt6 PE=1 SV=2	O18413	Rpt6	46 kDa	0		33	16
Importin subunit alpha OS=Drosophila melanogaster OX=7227 GN=Pen PE=1 SV=2	P52295	Pen	58 kDa	0		34	16
Integrator complex subunit 5 OS=Drosophila melanogaster OX=7227 GN=omd PE=1 SV=2	Q9VFS6	omd	113 kDa	0		35	22
LP07963p OS=Drosophila melanogaster OX=7227 GN=Dmel\CG8036 PE=1 SV=3	Q9VHN7	Dmel	68 kDa	0		35	18
Glyceraldehyde-3-phosphate dehydrogenase OS=Drosophila melanogaster OX=7227 GN=Gapdh2 PE=3 SV=1	M9PJN8 (+1)	Gapdh2	35 kDa	3	2	29	14
Licorne OS=Drosophila melanogaster OX=7227 GN=lic PE=1 SV=1	O62602	lic	38 kDa	1	1	32	18
Integrator complex subunit 7 OS=Drosophila melanogaster OX=7227 GN=defl PE=1 SV=1	Q9VT41	defl	112 kDa	0		34	21
Not1, isoform H OS=Drosophila melanogaster OX=7227 GN=Not1 PE=1 SV=1	A0A0B4LEZ3 (+3)	Not1	282 kDa	0		34	25
RE44350p OS=Drosophila melanogaster OX=7227 GN=aru PE=2 SV=1	Q8IGR0	aru	18 kDa	9	4	8	3
Chaperonin containing TCP1 subunit 8 OS=Drosophila melanogaster OX=7227 GN=CCT8 PE=1 SV=1	Q7K3J0	CCT8	59 kDa	0		31	20
DNA polymerase delta catalytic subunit OS=Drosophila melanogaster OX=7227 GN=DNApol-delta PE=2 SV=2	P54358	DNApol-delta	125 kDa	0		33	23
LD23835p (Fragment) OS=Drosophila melanogaster OX=7227 GN=BubR1 PE=2 SV=1	Q7KN56	BubR1	168 kDa	0		33	27
AT04516p OS=Drosophila melanogaster OX=7227 GN=Drp1 PE=2 SV=1	Q8IHG0 (+1)	Drp1	83 kDa	0		31	19
DNA-directed RNA polymerase subunit beta OS=Drosophila melanogaster OX=7227 GN=RpII140 PE=3 SV=1	A0A0B4LI86 (+1)	RpII140	134 kDa	0		30	21
Female sterile (2) ketel, isoform B OS=Drosophila melanogaster OX=7227 GN=Fs(2)Ket PE=4 SV=1	M9NDC3 (+1)	Fs	99 kDa	0		31	14
GEO01111p1 OS=Drosophila melanogaster OX=7227 GN=SkpA PE=1 SV=1	O77430	SkpA	19 kDa	0		31	16
Isoleucyl-tRNA synthetase, isoform A OS=Drosophila melanogaster OX=7227 GN=IleRS PE=1 SV=1	Q8MSW0	IleRS	141 kDa	0		31	25
Bicoid mRNA stability factor OS=Drosophila melanogaster OX=7227 GN=bsf PE=2 SV=1	Q95NR4 (+1)	bsf	157 kDa	0		31	23
Eukaryotic translation initiation factor 5A OS=Drosophila melanogaster OX=7227 GN=eEF5 PE=2 SV=2	Q9GU68	eEF5	18 kDa	0		31	10
Eukaryotic translation initiation factor 5 OS=Drosophila melanogaster OX=7227 GN=eIF5 PE=1 SV=1	Q9VXK6	eIF5	52 kDa	0		31	21
La related protein, isoform G OS=Drosophila melanogaster OX=7227 GN=larp PE=1 SV=1	A0A0B4K7Y7 (+1)	larp	178 kDa	4	3	21	16
Histone H2A OS=Drosophila melanogaster OX=7227 GN=His2Av PE=3 SV=1	A0A0B4KH25 (+1)	His2Av	15 kDa	1	1	24	8
Polyadenylate-binding protein OS=Drosophila melanogaster OX=7227 GN=pAbp PE=1 SV=3	P21187	pAbp	70 kDa	0		27	20
Gilgamesh, isoform L OS=Drosophila melanogaster OX=7227 GN=gish PE=1 SV=1	|#DECOY#A0A0B4KHL4|A0A0B4KHL4_DROME-DECOY		?	12	1	0
26S proteasome regulatory complex subunit p50 OS=Drosophila melanogaster OX=7227 GN=Rpt5 PE=1 SV=1	Q9V3V6	Rpt5	48 kDa	0		28	13
No circadian temperature entrainment, isoform D OS=Drosophila melanogaster OX=7227 GN=nocte PE=1 SV=1	M9PE74 (+1)	nocte	235 kDa	1	1	29	19
Eukaryotic translation initiation factor 2 subunit 1 OS=Drosophila melanogaster OX=7227 GN=eIF2alpha PE=2 SV=1	P41374 (+1)	eIF2alpha	39 kDa	0		30	18
26-29kD-proteinase OS=Drosophila melanogaster OX=7227 GN=26-29-p PE=1 SV=1	Q9V3U6	26-29-p	62 kDa	0		30	14
GEO07455p1 OS=Drosophila melanogaster OX=7227 GN=RpL35A PE=1 SV=1	Q9VNB9	RpL35A	18 kDa	1	1	20	13
FI09342p (Fragment) OS=Drosophila melanogaster OX=7227 GN=RpS18-RB PE=2 SV=1	B6IDT0 (+1)	RpS18-RB	20 kDa	0	0	20	13
T-complex protein 1 subunit delta OS=Drosophila melanogaster OX=7227 GN=CCT4 PE=1 SV=1	Q9VK69	CCT4	57 kDa	0		26	13
Rough deal protein OS=Drosophila melanogaster OX=7227 GN=rod PE=4 SV=1	O96695 (+1)	rod	241 kDa	0		29	22
Serine/threonine-protein kinase polo OS=Drosophila melanogaster OX=7227 GN=polo PE=1 SV=2	P52304	polo	67 kDa	0		29	16
PNUTSDm protein OS=Drosophila melanogaster OX=7227 GN=PNUTS PE=2 SV=1	Q70HU3 (+1)	PNUTS	121 kDa	0		0
Glycoprotein 93 OS=Drosophila melanogaster OX=7227 GN=Gp93 PE=1 SV=1	Q9VAY2	Gp93	90 kDa	0		29	18
Chorion peroxidase OS=Drosophila melanogaster OX=7227 GN=Pxt PE=2 SV=3	Q9VEG6	Pxt	91 kDa	0		29	17
ATPase family AAA domain-containing protein 3A homolog OS=Drosophila melanogaster OX=7227 GN=bor PE=1 SV=2	Q9VEX6	bor	68 kDa	0		29	18
RE10554p OS=Drosophila melanogaster OX=7227 GN=RpL40 PE=1 SV=1	Q7JYK1	RpL40	15 kDa	0		4	1
ATP synthase subunit beta OS=Drosophila melanogaster OX=7227 GN=ATPsynbeta PE=1 SV=1	L0MQ04 (+2)	ATPsynbeta	55 kDa	3	3	24	13
DNA-directed RNA polymerase subunit OS=Drosophila melanogaster OX=7227 PE=2 SV=1	A9UNH9 (+2)		209 kDa	0		26	18
Eukaryotic translation initiation factor 2 subunit gamma, isoform D OS=Drosophila melanogaster OX=7227 GN=eIF2gamma PE=4 SV=1	A0A0B4KGP8 (+1)	eIF2gamma	51 kDa	0		28	18
MIP08648p OS=Drosophila melanogaster OX=7227 GN=14-3-3epsilon-RA PE=2 SV=1	C6TP70 (+2)	14-3-3epsilon-RA	30 kDa	0		28	15
DNA replication licensing factor Mcm6 OS=Drosophila melanogaster OX=7227 GN=Mcm6 PE=1 SV=1	Q9V461	Mcm6	92 kDa	0		28	19
LP08082p OS=Drosophila melanogaster OX=7227 GN=Ranbp9 PE=1 SV=1	Q9VGP4	Ranbp9	114 kDa	0		28	17
Probable DNA mismatch repair protein Msh6 OS=Drosophila melanogaster OX=7227 GN=Msh6 PE=1 SV=2	Q9VUM0	Msh6	133 kDa	0		28	23
Ribosomal protein S2, isoform B OS=Drosophila melanogaster OX=7227 GN=RpS2 PE=3 SV=1	M9PB84 (+1)	RpS2	29 kDa	3	3	12	8
60S ribosomal protein L7 OS=Drosophila melanogaster OX=7227 GN=RpL7 PE=1 SV=2	P32100 (+1)	RpL7	30 kDa	3	3	19	10
LP14077p (Fragment) OS=Drosophila melanogaster OX=7227 GN=RpL3-RA PE=2 SV=1	C6SUV6 (+1)	RpL3-RA	47 kDa	7	4	7	2
60S ribosomal protein L13a OS=Drosophila melanogaster OX=7227 GN=RpL13A PE=1 SV=1	Q9VNE9	RpL13A	24 kDa	2	2	16	7
Lingerer, isoform I OS=Drosophila melanogaster OX=7227 GN=lig PE=1 SV=1	A0A0B4K6T1 (+5)	lig	131 kDa	0		26	12
Glyceraldehyde-3-phosphate dehydrogenase 1 OS=Drosophila melanogaster OX=7227 GN=Gapdh1 PE=2 SV=2	P07486	Gapdh1	35 kDa	0		25	3
Protein transport protein SEC23 OS=Drosophila melanogaster OX=7227 GN=Sec23 PE=1 SV=1	A0A0B4K5Z8 (+2)	Sec23	88 kDa	0		27	15
DNA helicase OS=Drosophila melanogaster OX=7227 GN=dpa PE=1 SV=1	A0A0B4LEV2 (+1)	dpa	97 kDa	0		27	16
Uncharacterized protein, isoform B OS=Drosophila melanogaster OX=7227 GN=Dmel\CG10915 PE=4 SV=1	A0A0B4LFS3 (+1)	Dmel	65 kDa	0		27	16
Uncharacterized protein, isoform D OS=Drosophila melanogaster OX=7227 GN=CG17419 PE=1 SV=1	A8Y582 (+2)	CG17419	124 kDa	0		27	20
Receptor of activated protein kinase C 1, isoform C OS=Drosophila melanogaster OX=7227 GN=Rack1 PE=4 SV=1	M9PCC1 (+1)	Rack1	36 kDa	0		27	14
Histone H2B OS=Drosophila melanogaster OX=7227 GN=His2B PE=1 SV=2	P02283	His2B	14 kDa	4	3	12	5
40S ribosomal protein SA OS=Drosophila melanogaster OX=7227 GN=sta-RD PE=2 SV=1	C6SV50 (+1)	sta-RD	35 kDa	2	2	23	11
Probable elongation factor 1-delta OS=Drosophila melanogaster OX=7227 GN=eEF1delta PE=1 SV=1	Q9VL18	eEF1delta	29 kDa	9	1	7	5
LD35750p OS=Drosophila melanogaster OX=7227 GN=eIF-2beta-RA PE=2 SV=1	F3YDB2 (+1)	eIF-2beta-RA	35 kDa	0		26	10
FI07923p OS=Drosophila melanogaster OX=7227 GN=Karybeta3 PE=1 SV=1	Q9VN44	Karybeta3	124 kDa	0		26	17
Staphylococcal nuclease domain-containing protein 1 OS=Drosophila melanogaster OX=7227 GN=Tudor-SN PE=1 SV=1	Q9W0S7	Tudor-SN	103 kDa	0		26	18
60S ribosomal protein L15 OS=Drosophila melanogaster OX=7227 GN=RpL15 PE=1 SV=1	O17445	RpL15	24 kDa	6	4	13	6
DNA topoisomerase 2 OS=Drosophila melanogaster OX=7227 GN=Top2 PE=1 SV=1	P15348	Top2	164 kDa	17	4	0
GH24511p OS=Drosophila melanogaster OX=7227 GN=Uba1 PE=1 SV=1	Q8T0L3	Uba1	131 kDa	0		23	21
Cysteine proteinase-1, isoform D OS=Drosophila melanogaster OX=7227 GN=Cp1 PE=1 SV=1	A0A0B4JD48 (+2)	Cp1	27 kDa	0		25	10
BIR repeat containing ubiquitin-conjugating enzyme, isoform E OS=Drosophila melanogaster OX=7227 GN=Bruce PE=1 SV=1	A0A0B4KFQ0 (+4)	Bruce	538 kDa	0		25	20
Pyruvate carboxylase OS=Drosophila melanogaster OX=7227 GN=PCB PE=1 SV=1	Q0E9E2 (+1)	PCB	133 kDa	0		25	18
AT27578p OS=Drosophila melanogaster OX=7227 GN=rin PE=1 SV=1	Q9VFT4	rin	75 kDa	0		25	14
Ribosomal protein LP1, isoform B OS=Drosophila melanogaster OX=7227 GN=RpLP1 PE=3 SV=1	M9PBK5 (+1)	RpLP1	12 kDa	7	2	10	4
GEO07462p1 OS=Drosophila melanogaster OX=7227 GN=RpL27A PE=2 SV=1	M9MRC9 (+1)	RpL27A	17 kDa	2	2	13	7
Protein on ecdysone puffs, isoform D OS=Drosophila melanogaster OX=7227 GN=Pep PE=1 SV=1	M9NG39 (+1)	Pep	76 kDa	0		23	14
Uncharacterized protein OS=Drosophila melanogaster OX=7227 GN=CG14896 PE=1 SV=1	B7Z0I8	CG14896	379 kDa	0	0	24	18
Tubulin gamma chain OS=Drosophila melanogaster OX=7227 GN=gammaTub37C PE=3 SV=1	M9PDN9 (+1)	gammaTub37C	51 kDa	0		24	13
Thiolase OS=Drosophila melanogaster OX=7227 GN=Thiolase PE=2 SV=1	O77466 (+1)	Thiolase	51 kDa	0		24	15
MIP08013p1 OS=Drosophila melanogaster OX=7227 GN=Mpcp2 PE=1 SV=1	Q0E8E8 (+1)	Mpcp2	39 kDa	0		24	12
Integrator complex subunit 2 OS=Drosophila melanogaster OX=7227 GN=IntS2 PE=1 SV=2	Q9VX31	IntS2	125 kDa	0		24	12
ZAP3, isoform C OS=Drosophila melanogaster OX=7227 GN=ZAP3 PE=1 SV=2	Q9W2Y5	ZAP3	205 kDa	0		0
E3 ubiquitin protein ligase OS=Drosophila melanogaster OX=7227 GN=Bre1 PE=3 SV=1	X2JGB3 (+1)	Bre1	119 kDa	0		24	19
ZAP3, isoform E OS=Drosophila melanogaster OX=7227 GN=ZAP3 PE=1 SV=1	M9NGY4	ZAP3	205 kDa	0		0
RE08669p OS=Drosophila melanogaster OX=7227 GN=RpL6 PE=1 SV=1	Q9V9W3	RpL6	30 kDa	9	6	1	1
GEO07453p1 OS=Drosophila melanogaster OX=7227 GN=RpL26 PE=1 SV=1	Q9VVU2	RpL26	17 kDa	1	1	15	8
RH14172p (Fragment) OS=Drosophila melanogaster OX=7227 GN=RpS10b-RB PE=2 SV=1	B7ZWP7 (+4)	RpS10b-RB	21 kDa	0		19	9
Protein phosphatase 1-binding protein Bifocal OS=Drosophila melanogaster OX=7227 GN=bif PE=2 SV=1	Q962F2	bif	130 kDa	1	1	0
Glycogen [starch] synthase OS=Drosophila melanogaster OX=7227 GN=GlyS PE=1 SV=1	A0A0B4KHJ5	GlyS	79 kDa	0		23	14
Target for rapamycin OS=Drosophila melanogaster OX=7227 GN=Tor PE=3 SV=1	H1ZYB5 (+3)	Tor	281 kDa	0		23	18
Dynactin subunit 1 OS=Drosophila melanogaster OX=7227 GN=DCTN1-p150 PE=1 SV=2	P13496	DCTN1-p150	141 kDa	0		23	18
26S proteasome non-ATPase regulatory subunit 11 OS=Drosophila melanogaster OX=7227 GN=Rpn6 PE=1 SV=1	Q7KLV9 (+1)	Rpn6	47 kDa	0		23	14
GH11341p OS=Drosophila melanogaster OX=7227 GN=Rpn5 PE=1 SV=1	Q9V3Z4	Rpn5	58 kDa	0		23	14
LD03220p OS=Drosophila melanogaster OX=7227 GN=Stip1 PE=1 SV=1	Q9VPN5	Stip1	56 kDa	0		23	19
AT02348p OS=Drosophila melanogaster OX=7227 GN=UQCR-C2 PE=1 SV=1	Q9VV75	UQCR-C2	45 kDa	0		23	15
EG:BACR25B3.9 protein OS=Drosophila melanogaster OX=7227 GN=Klp3A PE=1 SV=1	Q9XZ29	Klp3A	136 kDa	0		23	18
Ribosomal protein S19a, isoform C OS=Drosophila melanogaster OX=7227 GN=RpS19a PE=1 SV=1	E2QD65 (+1)	RpS19a	17 kDa	2	2	13	10
LD22577p OS=Drosophila melanogaster OX=7227 GN=Uba2 PE=1 SV=1	Q7KUA4 (+1)	Uba2	78 kDa	6	2	13	6
Coatomer subunit beta OS=Drosophila melanogaster OX=7227 GN=betaCOP PE=2 SV=2	P45437	betaCOP	107 kDa	1	1	20	11
Protein slender lobes OS=Drosophila melanogaster OX=7227 GN=sle PE=1 SV=1	Q8INM3	sle	159 kDa	1	1	21	13
MIP04243p OS=Drosophila melanogaster OX=7227 GN=Dmel\CG5028 PE=1 SV=1	A8JRB8 (+2)	Dmel	43 kDa	0		22	11
Ribonucleoside-diphosphate reductase large subunit OS=Drosophila melanogaster OX=7227 GN=RnrL PE=1 SV=2	P48591	RnrL	92 kDa	0		22	15
Probable elongator complex protein 2 OS=Drosophila melanogaster OX=7227 GN=Elp2 PE=1 SV=1	Q7K4B3	Elp2	89 kDa	0		22	14
LD06146p OS=Drosophila melanogaster OX=7227 GN=mor PE=2 SV=1	Q8MSY3 (+1)	mor	108 kDa	0		22	17
Lysine--tRNA ligase OS=Drosophila melanogaster OX=7227 GN=LysRS PE=1 SV=1	Q8SXM8	LysRS	65 kDa	0		22	14
Endosulfine, isoform A OS=Drosophila melanogaster OX=7227 GN=endos PE=1 SV=1	Q9VUB8	endos	13 kDa	0		22	10
Squid, isoform E OS=Drosophila melanogaster OX=7227 GN=sqd PE=4 SV=1	A0A0B4K6U6 (+1)	sqd	33 kDa	9	2	8	6
40S ribosomal protein S12 OS=Drosophila melanogaster OX=7227 GN=RpS12 PE=1 SV=2	P80455	RpS12	15 kDa	2	2	18	8
Tubulin alpha-4 chain OS=Drosophila melanogaster OX=7227 GN=alphaTub67C PE=3 SV=1	P06606	alphaTub67C	51 kDa	0		18	9
LD40489p OS=Drosophila melanogaster OX=7227 GN=SF2 PE=1 SV=1	Q9V3W7	SF2	28 kDa	0		21	11
Aralar1, isoform F OS=Drosophila melanogaster OX=7227 GN=aralar1 PE=1 SV=1	A0A0B4KHW3	aralar1	77 kDa	0		21	16
RH02809p OS=Drosophila melanogaster OX=7227 GN=stai PE=1 SV=1	Q9GQR5	stai	30 kDa	0		21	11
Integrator complex subunit 11 OS=Drosophila melanogaster OX=7227 GN=IntS11 PE=1 SV=1	Q9VAH9	IntS11	68 kDa	0		21	14
Anon1A4 OS=Drosophila melanogaster OX=7227 GN=Df31 PE=1 SV=1	O16043	Df31	19 kDa	12	5	6	4
TA01224p (Fragment) OS=Drosophila melanogaster OX=7227 GN=RpS6-RB PE=2 SV=1	D2NUH9 (+2)	RpS6-RB	31 kDa	2	2	5	1
MIP15344p OS=Drosophila melanogaster OX=7227 GN=RpL28 PE=1 SV=1	D1Z3A1 (+2)	RpL28	16 kDa	1	1	13	8
FI06040p (Fragment) OS=Drosophila melanogaster OX=7227 GN=CG11844-RB PE=2 SV=1	B5RIY3 (+2)	CG11844-RB	50 kDa	1	1	18	12
Histone H2A OS=Drosophila melanogaster OX=7227 GN=His2A PE=1 SV=2	P84051 (+1)	His2A	13 kDa	6	1	9	1
Eukaryotic translation elongation factor 1 gamma, isoform C OS=Drosophila melanogaster OX=7227 GN=eEF1gamma PE=4 SV=1	A0A0B4JD11	eEF1gamma	49 kDa	0		20	14
Uncharacterized protein, isoform D OS=Drosophila melanogaster OX=7227 GN=Gpat4 PE=1 SV=1	A0A0B4LGJ9 (+3)	Gpat4	61 kDa	0		20	14
Mi-2, isoform C OS=Drosophila melanogaster OX=7227 GN=Mi-2 PE=1 SV=1	E1JI46 (+3)	Mi-2	224 kDa	0		20	17
Regulatory particle non-ATPase 3, isoform B OS=Drosophila melanogaster OX=7227 GN=Rpn3 PE=1 SV=1	M9PG62 (+1)	Rpn3	56 kDa	0		20	15
AT25231p OS=Drosophila melanogaster OX=7227 GN=Strip PE=1 SV=2	Q8IRD5 (+1)	Strip	105 kDa	0		20	14
Integrator complex subunit 4 OS=Drosophila melanogaster OX=7227 GN=IntS4 PE=1 SV=1	Q9W3E1	IntS4	113 kDa	0		20	16
GEO11454p1 (Fragment) OS=Drosophila melanogaster OX=7227 PE=2 SV=1	A0A1B2AIV7 (+2)		19 kDa	3	2	11	7
Coatomer subunit beta' OS=Drosophila melanogaster OX=7227 GN=beta'COP PE=2 SV=2	O62621	beta	103 kDa	0		16	9
Tudor, isoform B OS=Drosophila melanogaster OX=7227 GN=tud PE=4 SV=1	A0A0B4LG05 (+1)	tud	285 kDa	0		19	16
FI03275p (Fragment) OS=Drosophila melanogaster OX=7227 GN=CG32164-RA PE=2 SV=1	B5RIL6 (+5)	CG32164-RA	125 kDa	0		19	13
Fatty acid synthase 1, isoform C OS=Drosophila melanogaster OX=7227 GN=FASN1 PE=1 SV=2	B7Z001 (+1)	FASN1	278 kDa	0		19	17
LP16188p (Fragment) OS=Drosophila melanogaster OX=7227 GN=Rpt4-RA PE=2 SV=1	C1C3F8 (+1)	Rpt4-RA	46 kDa	0		19	11
LD31742p OS=Drosophila melanogaster OX=7227 GN=whd PE=1 SV=1	Q7JQH9 (+1)	whd	89 kDa	0		19	10
SD07726p OS=Drosophila melanogaster OX=7227 GN=LeuRS PE=2 SV=1	Q8MRF8 (+2)	LeuRS	135 kDa	0		19	14
FK506-binding protein 59 OS=Drosophila melanogaster OX=7227 GN=FKBP59 PE=1 SV=1	Q9VL78 (+1)	FKBP59	49 kDa	0		19	15
GH02866p OS=Drosophila melanogaster OX=7227 GN=FBXO6 PE=2 SV=1	Q9W281	FBXO6	74 kDa	0		19	10
Ubiquitin carboxyl-terminal hydrolase OS=Drosophila melanogaster OX=7227 GN=Uch-L5 PE=1 SV=1	Q9XZ61	Uch-L5	38 kDa	0		19	14
GM06787p (Fragment) OS=Drosophila melanogaster OX=7227 PE=2 SV=1	Q5U0W4		19 kDa	0		11	1
40S ribosomal protein S13 OS=Drosophila melanogaster OX=7227 GN=RpS13 PE=1 SV=3	Q03334 (+1)	RpS13	17 kDa	3	1	11	6
Protein disulfide-isomerase (Fragment) OS=Drosophila melanogaster OX=7227 GN=ERp60 PE=1 SV=1	Q3YMU0	ERp60	55 kDa	1	1	16	12
Lamin, isoform B OS=Drosophila melanogaster OX=7227 GN=Lam PE=3 SV=1	M9NE89 (+1)	Lam	71 kDa	11	3	0
Calcium-transporting ATPase OS=Drosophila melanogaster OX=7227 GN=SERCA PE=1 SV=1	A0A0B4LGB7 (+2)	SERCA	109 kDa	0		18	14
FI06688p (Fragment) OS=Drosophila melanogaster OX=7227 GN=Sc2-RA PE=2 SV=1	B6IDR5 (+2)	Sc2-RA	35 kDa	0		18	8
Replication factor C subunit 1 OS=Drosophila melanogaster OX=7227 GN=Gnf1 PE=1 SV=2	P35600	Gnf1	109 kDa	0		18	17
IGF-II mRNA-binding protein, isoform K OS=Drosophila melanogaster OX=7227 GN=Imp PE=1 SV=2	Q0KHU2 (+1)	Imp	69 kDa	0		18	11
LD32453p (Fragment) OS=Drosophila melanogaster OX=7227 PE=2 SV=1	Q4QQB8 (+2)		136 kDa	0		18	15
Dynactin subunit 2 OS=Drosophila melanogaster OX=7227 GN=DCTN2-p50 PE=1 SV=1	Q7K2D2	DCTN2-p50	42 kDa	0		18	13
Nuclear pore protein OS=Drosophila melanogaster OX=7227 GN=Nup93-2 PE=1 SV=1	Q9VFE7	Nup93-2	91 kDa	0		18	17
RE14391p OS=Drosophila melanogaster OX=7227 GN=Sec63 PE=1 SV=1	Q9VS57	Sec63	86 kDa	0		18	12
LD02975p OS=Drosophila melanogaster OX=7227 GN=Dmel\CG9281 PE=1 SV=1	Q9VXR5	Dmel	70 kDa	0		18	12
GEO07301p1 OS=Drosophila melanogaster OX=7227 GN=RpS15 PE=1 SV=1	Q7JZW2	RpS15	17 kDa	1	1	13	4
RuvB-like helicase OS=Drosophila melanogaster OX=7227 GN=rept PE=3 SV=1	M9PFN1 (+1)	rept	54 kDa	0		11	7
Alpha-1,4 glucan phosphorylase OS=Drosophila melanogaster OX=7227 GN=GlyP PE=1 SV=1	A4UZZ4 (+1)	GlyP	97 kDa	0		17	15
Hsc70-interacting protein 1 OS=Drosophila melanogaster OX=7227 GN=HIP PE=1 SV=2	C4NYP8 (+2)	HIP	41 kDa	0		17	12
Eukaryotic translation initiation factor 3 subunit B OS=Drosophila melanogaster OX=7227 GN=eIF3b PE=1 SV=1	E2QCG7 (+1)	eIF3b	80 kDa	0		17	11
Phosphoglycerate kinase OS=Drosophila melanogaster OX=7227 GN=Pgk PE=3 SV=1	M9PCE0 (+1)	Pgk	44 kDa	0		17	12
Golgi complex-localized glycoprotein 1, isoform B OS=Drosophila melanogaster OX=7227 GN=Glg1 PE=1 SV=1	M9PIG4 (+1)	Glg1	125 kDa	0		17	14
RE28271p OS=Drosophila melanogaster OX=7227 GN=Dmel\CG5726 PE=1 SV=1	Q7JRH5	Dmel	87 kDa	0		17	8
Integrator complex subunit 3 OS=Drosophila melanogaster OX=7227 GN=IntS3 PE=1 SV=1	Q7PLS8	IntS3	124 kDa	0		17	11
Ferrochelatase, mitochondrial OS=Drosophila melanogaster OX=7227 GN=FeCh PE=2 SV=1	Q9V9S8	FeCh	44 kDa	0		17	12
Ribosomal RNA processing protein 1 homolog OS=Drosophila melanogaster OX=7227 GN=Nnp-1 PE=1 SV=1	Q9VJZ7	Nnp-1	79 kDa	0		0
40S ribosomal protein S30 (Fragment) OS=Drosophila melanogaster OX=7227 GN=RpS30 PE=2 SV=1	Q7JYY0 (+1)	RpS30	17 kDa	0		17	3
Protein disulfide-isomerase OS=Drosophila melanogaster OX=7227 PE=3 SV=1	Q9TWZ1		55 kDa	0		16	1
Abnormal spindle (Fragment) OS=Drosophila melanogaster OX=7227 GN=asp PE=4 SV=1	B6UW30	asp	36 kDa	0		17	1
LD37574p OS=Drosophila melanogaster OX=7227 GN=yps PE=1 SV=1	Q95RE4	yps	38 kDa	4	3	1	1
60S ribosomal protein L23 OS=Drosophila melanogaster OX=7227 GN=RpL23 PE=1 SV=2	P48159	RpL23	15 kDa	1	1	12	6
40S ribosomal protein S20 OS=Drosophila melanogaster OX=7227 GN=RpS20 PE=1 SV=1	P55828	RpS20	13 kDa	2	1	10	3
Microfibrillar-associated protein 1 OS=Drosophila melanogaster OX=7227 GN=Mfap1 PE=1 SV=1	Q9W062	Mfap1	56 kDa	6	2	0
60S ribosomal protein L36 OS=Drosophila melanogaster OX=7227 GN=RpL36 PE=1 SV=1	P49630 (+1)	RpL36	14 kDa	0		14	6
Regulatory particle non-ATPase 8, isoform B OS=Drosophila melanogaster OX=7227 GN=Rpn8 PE=4 SV=1	A0A0B4KFH4 (+2)	Rpn8	41 kDa	0		16	8
Serine/threonine protein phosphatase 2A regulatory subunit OS=Drosophila melanogaster OX=7227 GN=wrd PE=1 SV=1	A0A0B4KHB9 (+3)	wrd	81 kDa	0		16	4
RE54358p OS=Drosophila melanogaster OX=7227 GN=Bsg25D-RE PE=2 SV=1	E8NHA5 (+5)	Bsg25D-RE	121 kDa	0		16	15
Uncharacterized protein, isoform B OS=Drosophila melanogaster OX=7227 GN=fmt PE=1 SV=1	M9PEB1 (+1)	fmt	108 kDa	0		16	9
Eukaryotic translation initiation factor 3 subunit E OS=Drosophila melanogaster OX=7227 GN=eIF3e PE=1 SV=1	O77410	eIF3e	51 kDa	0		16	12
CG5012 (Fragment) OS=Drosophila melanogaster OX=7227 GN=mRpL12 PE=4 SV=1	Q2XYH0 (+1)	mRpL12	18 kDa	0		16	10
LD24265p OS=Drosophila melanogaster OX=7227 GN=Echs1 PE=1 SV=1	Q7JR58	Echs1	32 kDa	0		16	11
LD07294p OS=Drosophila melanogaster OX=7227 GN=Tap42 PE=1 SV=2	Q9VJZ5	Tap42	43 kDa	0		16	11
A16 OS=Drosophila melanogaster OX=7227 GN=A16 PE=2 SV=1	Q9VK43	A16	42 kDa	0		0
Probable cysteine desulfurase, mitochondrial OS=Drosophila melanogaster OX=7227 GN=CG12264 PE=2 SV=1	Q9VKD3	CG12264	51 kDa	0		16	11
LD25271p OS=Drosophila melanogaster OX=7227 GN=Dmel\CG6617 PE=1 SV=1	Q9VWS1	Dmel	26 kDa	0		16	9
RH48056p OS=Drosophila melanogaster OX=7227 GN=RpL34b PE=1 SV=1	Q9VHE5	RpL34b	18 kDa	0	0	10	8
Prefoldin 2, isoform B OS=Drosophila melanogaster OX=7227 GN=Pfdn2 PE=4 SV=1	M9PF40 (+1)	Pfdn2	16 kDa	0		9	7
Ribosomal protein L18, isoform B OS=Drosophila melanogaster OX=7227 GN=RpL18 PE=4 SV=1	M9PHM6 (+1)	RpL18	22 kDa	0	0	13	5
40S ribosomal protein S4 OS=Drosophila melanogaster OX=7227 GN=RpS4 PE=1 SV=2	P41042 (+1)	RpS4	29 kDa	0		14	7
Heat shock protein cognate 5, isoform B OS=Drosophila melanogaster OX=7227 GN=Hsc70-5 PE=3 SV=1	A0A0B4LFD2 (+1)	Hsc70-5	74 kDa	2	1	10	8
GH26270p OS=Drosophila melanogaster OX=7227 GN=Idh3b PE=1 SV=1	Q9VD58	Idh3b	40 kDa	0		14	9
FI02850p OS=Drosophila melanogaster OX=7227 GN=RpL34a PE=1 SV=2	Q9VBH8	RpL34a	18 kDa	0		9	1
Coatomer subunit gamma OS=Drosophila melanogaster OX=7227 GN=gammaCOP PE=1 SV=1	A0A0B4KHL2	gammaCOP	99 kDa	0		15	10
Without children, isoform E OS=Drosophila melanogaster OX=7227 GN=woc PE=1 SV=1	A0A0B4KHZ0 (+4)	woc	189 kDa	0		15	12
Eukaryotic translation initiation factor 3 subunit M OS=Drosophila melanogaster OX=7227 GN=eIF3m PE=3 SV=1	A0A0B4LFB3 (+1)	eIF3m	44 kDa	0		15	12
Kinesin-like protein OS=Drosophila melanogaster OX=7227 GN=sub PE=3 SV=1	A0A0B4LGW1 (+1)	sub	71 kDa	0		15	13
Granny smith, isoform F OS=Drosophila melanogaster OX=7227 GN=grsm PE=1 SV=1	A0A0C4FEI8 (+3)	grsm	71 kDa	0		15	8
CG4236-PA OS=Drosophila melanogaster OX=7227 GN=CG4236 PE=4 SV=1	C0MJE4 (+1)	CG4236	49 kDa	0		15	11
ATP-dependent 6-phosphofructokinase OS=Drosophila melanogaster OX=7227 GN=Pfk-RC PE=2 SV=1	C7LA80 (+3)	Pfk-RC	87 kDa	0		15	11
Clathrin light chain OS=Drosophila melanogaster OX=7227 GN=Clc PE=1 SV=1	E1JI22 (+1)	Clc	24 kDa	0		15	10
Hsc70Cb, isoform G OS=Drosophila melanogaster OX=7227 GN=Hsc70Cb PE=1 SV=1	M9MSL3 (+1)	Hsc70Cb	92 kDa	0		15	11
Eukaryotic translation initiation factor 3 subunit I OS=Drosophila melanogaster OX=7227 GN=eIF3i PE=1 SV=1	O02195	eIF3i	36 kDa	0		15	10
Eukaryotic translation initiation factor 4E1 OS=Drosophila melanogaster OX=7227 GN=eIF4E1 PE=1 SV=1	P48598	eIF4E1	29 kDa	0		15	8
Elongation factor 1 alpha-like factor OS=Drosophila melanogaster OX=7227 GN=eRF3 PE=2 SV=1	P91944 (+1)	eRF3	66 kDa	0		15	7
Protein rigor mortis OS=Drosophila melanogaster OX=7227 GN=rig PE=1 SV=1	Q86BY9	rig	138 kDa	0		15	11
Nuclear inhibitor of protein phosphatase 1 OS=Drosophila melanogaster OX=7227 GN=NiPp1 PE=1 SV=1	Q9V7W9	NiPp1	43 kDa	0		0
Cullin 2, isoform A OS=Drosophila melanogaster OX=7227 GN=Cul2 PE=1 SV=3	Q9V9R2	Cul2	87 kDa	0		15	11
GEO09167p1 OS=Drosophila melanogaster OX=7227 GN=Nph PE=1 SV=1	Q9VAC4	Nph	17 kDa	0		15	6
DNA replication licensing factor Mcm5 OS=Drosophila melanogaster OX=7227 GN=Mcm5 PE=1 SV=1	Q9VGW6	Mcm5	82 kDa	0		15	12
DNA replication licensing factor Mcm3 OS=Drosophila melanogaster OX=7227 GN=Mcm3 PE=1 SV=1	Q9XYU1 (+1)	Mcm3	91 kDa	0		15	12
Exportin-2 OS=Drosophila melanogaster OX=7227 GN=Cse1 PE=2 SV=2	Q9XZU1	Cse1	110 kDa	0		15	9
BcDNA.GH02678 OS=Drosophila melanogaster OX=7227 GN=Vps4 PE=1 SV=1	Q9Y162	Vps4	50 kDa	0		15	12
40S ribosomal protein S17 OS=Drosophila melanogaster OX=7227 GN=RpS17 PE=1 SV=2	P17704	RpS17	15 kDa	2	1	10	6
Uncharacterized protein, isoform B OS=Drosophila melanogaster OX=7227 GN=Dmel\CG8223 PE=4 SV=1	A0A126BEE6 (+1)	Dmel	52 kDa	3	1	10	9
Otefin OS=Drosophila melanogaster OX=7227 GN=Ote PE=1 SV=2	P20240	Ote	47 kDa	3	1	11	6
ATP synthase subunit gamma, mitochondrial OS=Drosophila melanogaster OX=7227 GN=ATPsyngamma PE=2 SV=2	O01666	ATPsyngamma	33 kDa	0	0	13	9
GEO10457p1 (Fragment) OS=Drosophila melanogaster OX=7227 PE=2 SV=1	A0A1B2AKQ4 (+1)		17 kDa	0		14	8
Integrator complex subunit 8 OS=Drosophila melanogaster OX=7227 GN=IntS8 PE=1 SV=1	A1ZAK1	IntS8	113 kDa	0		14	10
Heterogeneous nuclear ribonucleoprotein at 27C, isoform D OS=Drosophila melanogaster OX=7227 GN=Hrb27C PE=1 SV=1	E1JHA4 (+1)	Hrb27C	45 kDa	0		14	8
CG8378 (Fragment) OS=Drosophila melanogaster OX=7227 GN=CG8378 PE=4 SV=1	L0CP19 (+11)	CG8378	64 kDa	0		14	9
Myosin light chain cytoplasmic, isoform B OS=Drosophila melanogaster OX=7227 GN=Mlc-c PE=4 SV=1	M9NEW1 (+1)	Mlc-c	17 kDa	0		14	7
Vasa, isoform B OS=Drosophila melanogaster OX=7227 GN=vas PE=3 SV=1	M9PBB5 (+1)	vas	72 kDa	0		14	10
Proteasomal ubiquitin receptor ADRM1 homolog OS=Drosophila melanogaster OX=7227 GN=Rpn13 PE=1 SV=1	Q7K2G1	Rpn13	42 kDa	0		14	9
26S proteasome non-ATPase regulatory subunit 6 OS=Drosophila melanogaster OX=7227 GN=Rpn7 PE=2 SV=1	Q9V3G7	Rpn7	45 kDa	0		14	10
Nuclear pore complex protein Nup154 OS=Drosophila melanogaster OX=7227 GN=Nup154 PE=1 SV=1	Q9V463	Nup154	154 kDa	0		14	12
Cullin 3, isoform C OS=Drosophila melanogaster OX=7227 GN=Cul3 PE=1 SV=1	Q9V475	Cul3	90 kDa	0		14	10
GM14617p OS=Drosophila melanogaster OX=7227 GN=Mccc1 PE=1 SV=2	Q9V9T5	Mccc1	77 kDa	0		14	9
Eukaryotic translation initiation factor 3 subunit D-1 OS=Drosophila melanogaster OX=7227 GN=eIF3d1 PE=1 SV=1	Q9VCK0	eIF3d1	64 kDa	0		14	12
Cell division cycle 16 OS=Drosophila melanogaster OX=7227 GN=Cdc16 PE=1 SV=1	Q9VCN6	Cdc16	82 kDa	0		14	10
Nuclear migration protein NudC OS=Drosophila melanogaster OX=7227 GN=nudC PE=1 SV=2	Q9VVA6	nudC	38 kDa	0		14	9
LD41462p OS=Drosophila melanogaster OX=7227 GN=Dmel\CG4332 PE=1 SV=1	Q9VYG3	Dmel	64 kDa	0		14	7
Unconventional prefoldin RPB5 interactor-like protein OS=Drosophila melanogaster OX=7227 GN=uri PE=1 SV=1	Q9W148	uri	84 kDa	0		0
DNA damage-binding protein 1 OS=Drosophila melanogaster OX=7227 GN=pic PE=1 SV=1	Q9XYZ5	pic	126 kDa	0		14	12
B52, isoform O OS=Drosophila melanogaster OX=7227 GN=B52 PE=4 SV=1	A0A0C4DHG5 (+1)	B52	40 kDa	2	2	8	6
Peroxiredoxin 1 OS=Drosophila melanogaster OX=7227 GN=Jafrac1 PE=1 SV=1	Q9V3P0 (+1)	Jafrac1	22 kDa	4	3	3	1
60S ribosomal protein L18a OS=Drosophila melanogaster OX=7227 GN=RpL18A PE=1 SV=1	P41093	RpL18A	21 kDa	2	2	9	8
RE57391p OS=Drosophila melanogaster OX=7227 GN=yip6 PE=2 SV=1	Q6NL81 (+2)	yip6	16 kDa	1	1	9	6
Ran binding protein 3, isoform B OS=Drosophila melanogaster OX=7227 GN=RanBP3 PE=1 SV=1	A0A0B4KGQ0 (+1)	RanBP3	47 kDa	9	2	1	1
GEO13284p1 (Fragment) OS=Drosophila melanogaster OX=7227 PE=2 SV=1	A0A1B2AJL4 (+5)		18 kDa	1	1	5	1
GEO07624p1 OS=Drosophila melanogaster OX=7227 GN=RpL24 PE=1 SV=1	X2JE06	RpL24	18 kDa	1	1	3	3
Ribosomal protein L10, isoform E OS=Drosophila melanogaster OX=7227 GN=RpL10 PE=4 SV=1	M9PIM0 (+1)	RpL10	26 kDa	1	1	11	7
Tenzing norgay, isoform C OS=Drosophila melanogaster OX=7227 GN=tzn PE=1 SV=1	Q8IPU3 (+2)	tzn	39 kDa	0	0	11	8
GEO12513p1 OS=Drosophila melanogaster OX=7227 GN=RpS14b PE=2 SV=1	X2JCX8	RpS14b	16 kDa	3	2	8	7
60S ribosomal protein L17 OS=Drosophila melanogaster OX=7227 GN=RpL17 PE=1 SV=1	Q9W3W8 (+1)	RpL17	22 kDa	0		10	5
14-3-3zeta, isoform K OS=Drosophila melanogaster OX=7227 GN=14-3-3zeta PE=1 SV=1	A0A0B4KEH0 (+1)	14-3-3zeta	28 kDa	4	1	9	5
Coronin OS=Drosophila melanogaster OX=7227 GN=coro PE=1 SV=1	A0A0B4KEJ7 (+2)	coro	58 kDa	0		13	8
Eukaryotic translation elongation factor 1 beta, isoform C OS=Drosophila melanogaster OX=7227 GN=eEF1beta PE=3 SV=1	A0A0B4LFL3 (+1)	eEF1beta	24 kDa	0		13	8
AaRS-interacting multifunctional protein 1 OS=Drosophila melanogaster OX=7227 GN=AIMP1 PE=1 SV=1	A1Z7K8	AIMP1	34 kDa	0		13	11
Aldehyde dehydrogenase OS=Drosophila melanogaster OX=7227 GN=Aldh PE=2 SV=1	A9J7N9 (+2)	Aldh	57 kDa	0		13	10
Isocitrate dehydrogenase [NADP] OS=Drosophila melanogaster OX=7227 GN=Idh PE=1 SV=2	B7Z0E0 (+3)	Idh	54 kDa	0		13	10
MIP15933p (Fragment) OS=Drosophila melanogaster OX=7227 GN=Eb1-RA PE=2 SV=1	D3DMK3 (+1)	Eb1-RA	36 kDa	0		13	11
LD24381p1 (Fragment) OS=Drosophila melanogaster OX=7227 GN=CG9684-RA PE=2 SV=1	N0A2N3 (+2)	CG9684-RA	73 kDa	0		13	10
Thioredoxin reductase 1, mitochondrial OS=Drosophila melanogaster OX=7227 GN=Trxr-1 PE=1 SV=2	P91938	Trxr-1	64 kDa	0		13	11
Replication protein A 70 kDa DNA-binding subunit OS=Drosophila melanogaster OX=7227 GN=RpA-70 PE=1 SV=1	Q24492	RpA-70	67 kDa	0		13	9
RE07060p OS=Drosophila melanogaster OX=7227 PE=2 SV=1	Q4QQC1 (+1)		97 kDa	0		13	10
LD30448p OS=Drosophila melanogaster OX=7227 GN=CG10576 PE=2 SV=2	Q5U0Z2 (+1)	CG10576	43 kDa	0		13	10
GH03947p OS=Drosophila melanogaster OX=7227 GN=Dmel\CG9005 PE=2 SV=1	Q7JXG9	Dmel	138 kDa	0		13	8
GH17623p OS=Drosophila melanogaster OX=7227 GN=CG3364 PE=2 SV=1	Q7K332	CG3364	28 kDa	0		13	8
Eukaryotic translation initiation factor 3 subunit H OS=Drosophila melanogaster OX=7227 GN=eIF3h PE=1 SV=2	Q9U9Q4	eIF3h	38 kDa	0		13	8
LD15904p OS=Drosophila melanogaster OX=7227 GN=pzg PE=1 SV=1	Q9VP57	pzg	105 kDa	0		13	7
Centromere/kinetochore protein zw10 OS=Drosophila melanogaster OX=7227 GN=Zw10 PE=1 SV=2	Q9W4X9	Zw10	82 kDa	0		13	9
Uncharacterized protein, isoform B OS=Drosophila melanogaster OX=7227 GN=Dmel\CG5446 PE=1 SV=1	M9PBA6 (+2)	Dmel	9 kDa	4	3	4	3
Casein kinase II beta subunit, isoform C OS=Drosophila melanogaster OX=7227 GN=CkIIbeta PE=1 SV=1	A4V4C1 (+2)	CkIIbeta	25 kDa	7	1	5	4
Profilin OS=Drosophila melanogaster OX=7227 GN=chic PE=2 SV=1	M9NEU5 (+1)	chic	14 kDa	1	1	11	2
GEO04460p1 OS=Drosophila melanogaster OX=7227 GN=RpS23 PE=2 SV=1	A0A0B4LFD9 (+1)	RpS23	16 kDa	0	0	10	7
CG3509 protein OS=Drosophila melanogaster OX=7227 GN=CG3509 PE=3 SV=1	A0APA5 (+4)	CG3509	38 kDa	0		10	5
Protein argonaute-2 OS=Drosophila melanogaster OX=7227 GN=AGO2 PE=1 SV=3	Q9VUQ5	AGO2	137 kDa	0	0	12	10
Succinate--CoA ligase [ADP-forming] subunit beta, mitochondrial OS=Drosophila melanogaster OX=7227 GN=ScsbetaA PE=1 SV=1	A0A0B4JCW4 (+3)	ScsbetaA	49 kDa	0		12	6
Uncharacterized protein, isoform C OS=Drosophila melanogaster OX=7227 GN=Nup188 PE=1 SV=1	A0A0B4K859 (+1)	Nup188	214 kDa	0		12	9
Shibire, isoform F OS=Drosophila melanogaster OX=7227 GN=shi PE=1 SV=1	A4V4I8 (+7)	shi	98 kDa	0		12	11
Poly [ADP-ribose] polymerase OS=Drosophila melanogaster OX=7227 GN=Parp PE=1 SV=1	P35875	Parp	114 kDa	0		12	10
Failed axon connections protein OS=Drosophila melanogaster OX=7227 GN=fax PE=2 SV=1	Q24036 (+2)	fax	47 kDa	0		12	9
FI02065p OS=Drosophila melanogaster OX=7227 GN=Dmel\CG9795 PE=2 SV=1	Q59E01 (+1)	Dmel	76 kDa	0		12	9
Ankyrin repeat and LEM domain containing 2, isoform D OS=Drosophila melanogaster OX=7227 GN=Ankle2 PE=1 SV=1	Q8MQX9 (+2)	Ankle2	129 kDa	0		12	10
Exportin-1 OS=Drosophila melanogaster OX=7227 GN=emb PE=1 SV=1	Q9TVM2	emb	123 kDa	0		12	10
Protein zwilch OS=Drosophila melanogaster OX=7227 GN=Zwilch PE=1 SV=1	Q9VA00	Zwilch	72 kDa	0		12	9
Nuclear pore complex protein Nup98-Nup96 OS=Drosophila melanogaster OX=7227 GN=Nup98-96 PE=1 SV=3	Q9VCH5 (+3)	Nup98-96	210 kDa	0		12	8
Female-specific independent of transformer OS=Drosophila melanogaster OX=7227 GN=fit PE=1 SV=1	Q9VD66	fit	14 kDa	0		12	5
GH12714p OS=Drosophila melanogaster OX=7227 GN=PpD3 PE=1 SV=1	Q9VH81	PpD3	59 kDa	0		12	9
Ubiquitin carboxyl-terminal hydrolase OS=Drosophila melanogaster OX=7227 GN=Usp5 PE=1 SV=1	Q9VZU7	Usp5	92 kDa	0		12	10
Eukaryotic translation initiation factor 3 subunit G-1 OS=Drosophila melanogaster OX=7227 GN=eIF3g1 PE=1 SV=1	Q9W4X7	eIF3g1	30 kDa	0		12	6
Gamma-tubulin complex component 3 OS=Drosophila melanogaster OX=7227 GN=Grip91 PE=1 SV=2	Q9XYP8	Grip91	104 kDa	0		12	10
SD07771p OS=Drosophila melanogaster OX=7227 GN=Zw10 PE=2 SV=1	Q8T9C2	Zw10	55 kDa	0		12	1
FI05241p OS=Drosophila melanogaster OX=7227 PE=2 SV=1	C7LA94 (+1)		61 kDa	1	1	10	8
Megator, isoform B OS=Drosophila melanogaster OX=7227 GN=Mtor PE=1 SV=1	A0A0B4KFE9 (+1)	Mtor	262 kDa	0		10	9
Glutathione S-transferase D1 OS=Drosophila melanogaster OX=7227 GN=GstD1 PE=1 SV=1	P20432	GstD1	24 kDa	0	0	10	7
Kinesin-like protein OS=Drosophila melanogaster OX=7227 GN=Klp10A PE=1 SV=1	A4V4A1 (+1)	Klp10A	89 kDa	0		10	8
Uncharacterized protein, isoform E OS=Drosophila melanogaster OX=7227 GN=Dmel\CG8963 PE=1 SV=1	A0A0B4K891 (+1)	Dmel	58 kDa	0		11	8
Uncharacterized protein, isoform B OS=Drosophila melanogaster OX=7227 GN=Dmel\CG8635 PE=4 SV=1	A0A0B4LEV3 (+1)	Dmel	45 kDa	0		11	10
Uncharacterized protein, isoform B OS=Drosophila melanogaster OX=7227 GN=cg7461 PE=1 SV=2	A1ZBJ2 (+1)	cg7461	68 kDa	0		11	5
GTP-binding nuclear protein OS=Drosophila melanogaster OX=7227 GN=Ran PE=1 SV=1	A4V4A5 (+1)	Ran	25 kDa	0		11	7
ATP-citrate synthase OS=Drosophila melanogaster OX=7227 GN=ATPCL PE=1 SV=1	E2QCF1	ATPCL	120 kDa	0		11	10
CG12262-PA OS=Drosophila melanogaster OX=7227 GN=CG12262 PE=3 SV=1	G3KKP7 (+1)	CG12262	46 kDa	0		11	10
Serine/threonine-protein phosphatase OS=Drosophila melanogaster OX=7227 GN=Pp2B-14D PE=3 SV=1	M9NE01 (+1)	Pp2B-14D	63 kDa	0		11	8
Fibroblast growth factor receptor 1 oncogene partner 2, isoform B OS=Drosophila melanogaster OX=7227 GN=Fgop2 PE=4 SV=1	M9PEZ2 (+1)	Fgop2	35 kDa	0		11	8
Regulatory particle non-ATPase 10, isoform B OS=Drosophila melanogaster OX=7227 GN=Rpn10 PE=4 SV=1	M9PIG8 (+1)	Rpn10	43 kDa	0		11	8
Putative ARF1 GTPase activating protein OS=Drosophila melanogaster OX=7227 GN=ArfGAP1 PE=2 SV=1	O18358 (+1)	ArfGAP1	51 kDa	0		11	8
Protein Smaug OS=Drosophila melanogaster OX=7227 GN=smg PE=1 SV=2	Q23972	smg	109 kDa	0		11	8
LD18435p OS=Drosophila melanogaster OX=7227 GN=twin PE=1 SV=1	Q7K112 (+3)	twin	63 kDa	0		11	9
Pyruvate dehydrogenase E1 component subunit alpha OS=Drosophila melanogaster OX=7227 GN=Pdha PE=1 SV=1	Q7KVX1 (+1)	Pdha	49 kDa	0		11	8
Protein disulfide-isomerase A6 homolog OS=Drosophila melanogaster OX=7227 GN=CaBP1 PE=1 SV=1	Q9V438	CaBP1	47 kDa	0		11	9
Cullin 5 OS=Drosophila melanogaster OX=7227 GN=Cul5 PE=1 SV=1	Q9VAQ0	Cul5	97 kDa	0		11	10
Integrator complex subunit 12 OS=Drosophila melanogaster OX=7227 GN=IntS12 PE=1 SV=1	Q9VBB3	IntS12	34 kDa	0		11	7
LD28127p OS=Drosophila melanogaster OX=7227 GN=Dmel\CG17746 PE=1 SV=1	Q9VZS1	Dmel	41 kDa	0		11	7
LD27033p OS=Drosophila melanogaster OX=7227 GN=Dmel\CG8108 PE=1 SV=1	Q9VT61	Dmel	103 kDa	5	1	3	2
LD38861p OS=Drosophila melanogaster OX=7227 GN=Dmel\CG2246 PE=1 SV=1	Q8IMI0 (+2)	Dmel	43 kDa	5	1	2	1
60S ribosomal protein L31 OS=Drosophila melanogaster OX=7227 GN=RpL31 PE=1 SV=1	Q9V597	RpL31	15 kDa	1	1	7	6
40S ribosomal protein S24 OS=Drosophila melanogaster OX=7227 GN=RpS24 PE=1 SV=1	Q9W229	RpS24	15 kDa	1	1	8	4
FI17138p1 OS=Drosophila melanogaster OX=7227 GN=spag PE=1 SV=1	Q9V3E9	spag	60 kDa	0		3	2
Probable E3 ubiquitin-protein ligase HERC2 OS=Drosophila melanogaster OX=7227 GN=HERC2 PE=1 SV=3	Q9VR91	HERC2	530 kDa	0		7	4
Caprin, isoform B OS=Drosophila melanogaster OX=7227 GN=Capr PE=1 SV=1	E4NKG1 (+1)	Capr	104 kDa	2	1	8	8
LD40944p OS=Drosophila melanogaster OX=7227 GN=Dmel\CG12391 PE=1 SV=1	Q7K4G8	Dmel	66 kDa	6	1	4	2
Heat shock 70 kDa protein cognate 2 OS=Drosophila melanogaster OX=7227 GN=Hsc70-2 PE=1 SV=2	P11146	Hsc70-2	70 kDa	1	1	0
Thioredoxin domain-containing protein 5 homolog OS=Drosophila melanogaster OX=7227 GN=prtp PE=1 SV=2	Q9VYV3	prtp	47 kDa	0		9	7
MICOS complex subunit MIC60 OS=Drosophila melanogaster OX=7227 GN=Mitofilin PE=3 SV=1	A0A0B4KGN2 (+2)	Mitofilin	83 kDa	0		10	5
Tripeptidyl-peptidase II, isoform F OS=Drosophila melanogaster OX=7227 GN=TppII PE=4 SV=1	A0A0B4LGC0 (+1)	TppII	149 kDa	0		10	8
Nucleoside diphosphate kinase OS=Drosophila melanogaster OX=7227 GN=awd PE=1 SV=1	A0A0B4LHX6 (+3)	awd	19 kDa	0		10	4
Translationally controlled tumor protein, isoform B OS=Drosophila melanogaster OX=7227 GN=Tctp PE=3 SV=1	A0A126GUT1 (+2)	Tctp	20 kDa	0		10	7
Proteasome subunit alpha type OS=Drosophila melanogaster OX=7227 GN=Dmel\CG30382 PE=1 SV=1	E1JGZ9 (+1)	Dmel	27 kDa	0		10	6
Uncharacterized protein, isoform B OS=Drosophila melanogaster OX=7227 GN=NO66 PE=1 SV=1	E2QD64 (+1)	NO66	73 kDa	0		10	7
Proteasome subunit alpha type OS=Drosophila melanogaster OX=7227 GN=Prosalpha6 PE=2 SV=1	I0DHK3 (+1)	Prosalpha6	31 kDa	0		10	7
DNA primase large subunit OS=Drosophila melanogaster OX=7227 GN=DNApol-alpha60-RA PE=2 SV=1	I1WYG8 (+1)	DNApol-alpha60-RA	61 kDa	0		10	8
Serine/threonine-protein phosphatase OS=Drosophila melanogaster OX=7227 GN=PpV PE=3 SV=1	M9PGI3 (+1)	PpV	35 kDa	0		10	4
DNA-directed RNA polymerase I subunit RPA2 OS=Drosophila melanogaster OX=7227 GN=RpI135 PE=1 SV=2	P20028	RpI135	128 kDa	0		10	8
Actin-related protein 1 OS=Drosophila melanogaster OX=7227 GN=Arp1 PE=2 SV=2	P45889	Arp1	43 kDa	0		10	8
Elongin C, isoform A OS=Drosophila melanogaster OX=7227 GN=EloC PE=1 SV=1	Q7JWD6	EloC	13 kDa	0		10	6
GH10652p OS=Drosophila melanogaster OX=7227 GN=p90 PE=1 SV=1	Q8MZI3	p90	88 kDa	0		10	6
GH28796p OS=Drosophila melanogaster OX=7227 GN=Dmel\CG8001 PE=1 SV=1	Q8SX92 (+1)	Dmel	83 kDa	0		10	8
Serine palmitoyl transferase LCB2 subunit OS=Drosophila melanogaster OX=7227 GN=lace PE=2 SV=1	Q9U912	lace	66 kDa	0		10	9
Zinc finger protein-like 1 homolog OS=Drosophila melanogaster OX=7227 GN=CG5382 PE=1 SV=1	Q9VD26	CG5382	34 kDa	0		10	3
General transcription factor IIH subunit OS=Drosophila melanogaster OX=7227 GN=Ssl1 PE=1 SV=2	Q9VNP8	Ssl1	49 kDa	0		10	6
60S ribosomal protein L9 OS=Drosophila melanogaster OX=7227 GN=RpL9 PE=1 SV=2	P50882 (+1)	RpL9	21 kDa	4	2	3	3
SD23516p OS=Drosophila melanogaster OX=7227 GN=CG1910 PE=2 SV=1	Q86PC7 (+4)	CG1910	46 kDa	5	1	1	1
40S ribosomal protein S26 OS=Drosophila melanogaster OX=7227 GN=RpS26 PE=3 SV=1	M9PG47 (+1)	RpS26	13 kDa	1	1	3	2
LD15349p OS=Drosophila melanogaster OX=7227 GN=Pih1D1 PE=1 SV=1	Q9VK57	Pih1D1	38 kDa	0		5	3
GEO05313p1 OS=Drosophila melanogaster OX=7227 GN=Dmel\CG1943 PE=1 SV=1	Q9VI56	Dmel	12 kDa	2	1	7	3
A-kinase anchor protein 200 OS=Drosophila melanogaster OX=7227 GN=Akap200 PE=1 SV=3	Q9VLL3	Akap200	79 kDa	8	2	0
RE62581p OS=Drosophila melanogaster OX=7227 GN=RpL21 PE=1 SV=1	Q9V9M7	RpL21	18 kDa	1	1	8	6
MOB kinase activator 4, isoform B OS=Drosophila melanogaster OX=7227 GN=Mob4 PE=4 SV=1	A0A0B4K6X9 (+1)	Mob4	26 kDa	0		9	6
Uncharacterized protein, isoform B OS=Drosophila melanogaster OX=7227 GN=Dmel\CG15099 PE=4 SV=1	A0A0B4KG81 (+1)	Dmel	300 kDa	0		9	6
FI09332p (Fragment) OS=Drosophila melanogaster OX=7227 GN=CG7671-RA PE=2 SV=1	B5RJQ1 (+1)	CG7671-RA	42 kDa	0		9	6
AT12313p OS=Drosophila melanogaster OX=7227 GN=CG5508-RC PE=2 SV=1	C6TPB4 (+1)	CG5508-RC	88 kDa	0		9	7
Brain tumor, isoform F OS=Drosophila melanogaster OX=7227 GN=brat PE=2 SV=1	E8NHB3 (+2)	brat	110 kDa	0		9	4
Elongin B OS=Drosophila melanogaster OX=7227 GN=EloB PE=1 SV=1	O44226	EloB	13 kDa	0		9	5
Proteasome subunit alpha type-4 OS=Drosophila melanogaster OX=7227 GN=Prosalpha3 PE=1 SV=2	P18053	Prosalpha3	29 kDa	0		9	6
DNA polymerase alpha catalytic subunit OS=Drosophila melanogaster OX=7227 GN=DNApol-alpha180 PE=1 SV=2	P26019	DNApol-alpha180	170 kDa	0		9	9
Replication factor C subunit 2 OS=Drosophila melanogaster OX=7227 GN=RfC4 PE=1 SV=1	P53034	RfC4	37 kDa	0		9	7
MEP-1, isoform A OS=Drosophila melanogaster OX=7227 GN=MEP-1 PE=1 SV=1	Q0E8J0 (+2)	MEP-1	124 kDa	0		9	6
GH04763p (Fragment) OS=Drosophila melanogaster OX=7227 GN=CG11183 PE=2 SV=1	Q52KA4 (+1)	CG11183	43 kDa	0		9	5
GH11294p OS=Drosophila melanogaster OX=7227 GN=SmydA-1 PE=2 SV=1	Q7K561	SmydA-1	59 kDa	0		9	6
Transcription factor BTF3 OS=Drosophila melanogaster OX=7227 GN=bic PE=1 SV=1	Q7KM15 (+1)	bic	18 kDa	0		9	5
Eukaryotic initiation factor 4B OS=Drosophila melanogaster OX=7227 GN=eIF4B PE=1 SV=1	Q7PLL3	eIF4B	52 kDa	0		9	7
Histone deacetylase Rpd3 OS=Drosophila melanogaster OX=7227 GN=Rpd3 PE=1 SV=2	Q94517	Rpd3	58 kDa	0		9	7
Succinate dehydrogenase [ubiquinone] flavoprotein subunit, mitochondrial OS=Drosophila melanogaster OX=7227 GN=SdhA PE=2 SV=3	Q94523	SdhA	72 kDa	0		9	7
Structural maintenance of chromosomes protein OS=Drosophila melanogaster OX=7227 GN=glu PE=2 SV=1	Q9U6I2 (+1)	glu	160 kDa	0		9	7
Aconitate hydratase, mitochondrial OS=Drosophila melanogaster OX=7227 GN=mAcon1 PE=1 SV=2	Q9VIE8	mAcon1	85 kDa	0		9	7
LD41958p OS=Drosophila melanogaster OX=7227 GN=Wdfy2 PE=1 SV=1	Q9VKW1	Wdfy2	46 kDa	0		9	5
HL08109p OS=Drosophila melanogaster OX=7227 GN=yip2 PE=1 SV=1	Q9VL70	yip2	42 kDa	0		9	6
Alanine--tRNA ligase, cytoplasmic OS=Drosophila melanogaster OX=7227 GN=AlaRS PE=2 SV=1	Q9VLM8 (+1)	AlaRS	108 kDa	0		9	8
LD35289p OS=Drosophila melanogaster OX=7227 GN=Dmel\CG8003 PE=1 SV=1	Q9VTB0	Dmel	46 kDa	0		9	7
Eukaryotic translation initiation factor 3 subunit L OS=Drosophila melanogaster OX=7227 GN=eIF3l PE=2 SV=1	Q9VTU4	eIF3l	63 kDa	0		9	7
N(Alpha)-acetyltransferase 15/16, isoform A OS=Drosophila melanogaster OX=7227 GN=Naa15-16 PE=1 SV=1	Q9VWI2	Naa15-16	103 kDa	0		9	7
Ubiquitinyl hydrolase 1 OS=Drosophila melanogaster OX=7227 GN=Usp16-45 PE=1 SV=1	Q9W4C3	Usp16-45	121 kDa	0		9	4
Coatomer subunit epsilon OS=Drosophila melanogaster OX=7227 GN=epsilonCOP PE=1 SV=1	Q9Y0Y5	epsilonCOP	35 kDa	0		9	6
CG9893 protein OS=Drosophila melanogaster OX=7227 GN=CG9893 PE=4 SV=1	A0AQB0 (+1)	CG9893	21 kDa	0		9	5
Protein nessun dorma OS=Drosophila melanogaster OX=7227 GN=nesd PE=1 SV=1	Q9VIP0	nesd	68 kDa	9	2	0
Liprin-alpha, isoform E OS=Drosophila melanogaster OX=7227 GN=Liprin-alpha PE=1 SV=1	M9PCD4 (+2)	Liprin-alpha	136 kDa	0		9	3
Ribosomal protein L11, isoform B OS=Drosophila melanogaster OX=7227 GN=RpL11 PE=1 SV=1	A0A0B4LGZ5 (+1)	RpL11	21 kDa	1	1	5	3
Histone H4 OS=Drosophila melanogaster OX=7227 GN=His4r PE=3 SV=1	A0A0B4KFZ9	His4r	11 kDa	1	1	6	5
Box A-binding factor OS=Drosophila melanogaster OX=7227 GN=srp PE=1 SV=2	P52172	srp	134 kDa	6	1	0
IP07888p OS=Drosophila melanogaster OX=7227 GN=RpL12 PE=2 SV=1	Q4V5X9 (+1)	RpL12	32 kDa	0	0	6	5
Nucleoplasmin, isoform B OS=Drosophila melanogaster OX=7227 GN=Nlp PE=4 SV=1	A0A0B4KI24 (+1)	Nlp	17 kDa	0		7	4
Uncharacterized protein, isoform C OS=Drosophila melanogaster OX=7227 GN=Dmel\CG10254 PE=1 SV=1	A0A0B4KHY8 (+1)	Dmel	154 kDa	0		8	5
Uncharacterized protein, isoform C OS=Drosophila melanogaster OX=7227 GN=Dmel\CG4538 PE=1 SV=1	A0A0B4LID7 (+1)	Dmel	72 kDa	0		8	6
GEO09668p1 (Fragment) OS=Drosophila melanogaster OX=7227 PE=2 SV=1	A0A1B3Q3R0 (+1)		17 kDa	0		8	6
Nuclear pore complex protein OS=Drosophila melanogaster OX=7227 GN=Nup107 PE=3 SV=1	A1YK54 (+8)	Nup107	97 kDa	0		8	7
NAT1, isoform D OS=Drosophila melanogaster OX=7227 GN=NAT1 PE=1 SV=1	A1Z968 (+1)	NAT1	163 kDa	0		8	5
MIP16230p OS=Drosophila melanogaster OX=7227 GN=Vha68-2 PE=1 SV=1	A4V0N4 (+1)	Vha68-2	68 kDa	0		8	6
Uncharacterized protein, isoform B OS=Drosophila melanogaster OX=7227 GN=Dmel\CG31635 PE=4 SV=1	A8DYW2 (+7)	Dmel	188 kDa	0		0
CG5363-PA OS=Drosophila melanogaster OX=7227 GN=CG5363 PE=3 SV=1	C0MJ66 (+1)	CG5363	34 kDa	0		8	7
FI07667p OS=Drosophila melanogaster OX=7227 GN=Cdc37-RA PE=2 SV=1	C4IY07 (+2)	Cdc37-RA	45 kDa	0		8	7
Enolase, isoform F OS=Drosophila melanogaster OX=7227 GN=Eno PE=1 SV=1	E1JHR5 (+1)	Eno	47 kDa	0		8	4
GM24606p (Fragment) OS=Drosophila melanogaster OX=7227 GN=oho23B-RE PE=2 SV=1	E4NKJ9 (+2)	oho23B-RE	11 kDa	0		8	4
Mitotic checkpoint control protein OS=Drosophila melanogaster OX=7227 GN=Bub3 PE=2 SV=1	O76523 (+2)	Bub3	37 kDa	0		8	6
DNA replication licensing factor Mcm2 OS=Drosophila melanogaster OX=7227 GN=Mcm2 PE=1 SV=1	P49735	Mcm2	100 kDa	0		8	6
Serine protease nudel OS=Drosophila melanogaster OX=7227 GN=ndl PE=1 SV=2	P98159	ndl	292 kDa	0		8	7
CG12234 (Fragment) OS=Drosophila melanogaster OX=7227 GN=Ranbp21 PE=4 SV=1	Q2XXZ0 (+2)	Ranbp21	138 kDa	0		8	5
Cullin 4, isoform A OS=Drosophila melanogaster OX=7227 GN=Cul4 PE=1 SV=1	Q5BI50	Cul4	94 kDa	0		8	6
Serine/threonine-protein kinase ATM OS=Drosophila melanogaster OX=7227 GN=tefu PE=2 SV=1	Q5EAK6	tefu	318 kDa	0		8	5
Ctr9, isoform A OS=Drosophila melanogaster OX=7227 GN=Ctr9 PE=1 SV=1	Q7K0X3	Ctr9	130 kDa	0		8	6
Pyruvate dehydrogenase E1 component subunit beta OS=Drosophila melanogaster OX=7227 GN=Pdhb PE=1 SV=1	Q7K5K3 (+1)	Pdhb	39 kDa	0		8	7
LD06837p (Fragment) OS=Drosophila melanogaster OX=7227 GN=RfC38 PE=2 SV=1	Q7KLW6 (+1)	RfC38	46 kDa	0		8	6
RH56418p OS=Drosophila melanogaster OX=7227 GN=ThrRS PE=2 SV=1	Q8IGC5 (+3)	ThrRS	82 kDa	0		8	8
Symplekin OS=Drosophila melanogaster OX=7227 GN=Sym PE=1 SV=1	Q8MSU4	Sym	132 kDa	0		8	7
GM01350p OS=Drosophila melanogaster OX=7227 GN=alpha-KGDHC PE=1 SV=1	Q9VGQ1	alpha-KGDHC	50 kDa	0		8	6
Ubiquitin carboxyl-terminal hydrolase 7 OS=Drosophila melanogaster OX=7227 GN=Usp7 PE=1 SV=1	Q9VYQ8 (+1)	Usp7	130 kDa	0		8	6
DNA polymerase delta small subunit OS=Drosophila melanogaster OX=7227 GN=CG12018 PE=2 SV=1	Q9W088 (+1)	CG12018	48 kDa	0		8	5
Nuclear pore complex protein Nup93-1 OS=Drosophila melanogaster OX=7227 GN=Nup93-1 PE=1 SV=1	Q9XZ06	Nup93-1	94 kDa	0		8	8
Heat shock protein 23, isoform B OS=Drosophila melanogaster OX=7227 GN=Hsp23 PE=3 SV=1	M9NE68 (+1)	Hsp23	21 kDa	0		8	2
Bacchus OS=Drosophila melanogaster OX=7227 GN=Bacc PE=2 SV=1	Q9VQF7	Bacc	15 kDa	2	1	4	3
Ribosomal protein L37 OS=Drosophila melanogaster OX=7227 GN=RpL37a PE=2 SV=1	M9PH59 (+1)	RpL37a	11 kDa	0	0	5	4
GEO08974p1 OS=Drosophila melanogaster OX=7227 GN=Pfdn6 PE=2 SV=1	M9PD09 (+1)	Pfdn6	14 kDa	0		3	3
Microtubule-associated protein 205, isoform C OS=Drosophila melanogaster OX=7227 GN=Map205 PE=1 SV=1	A0A0B4KI71 (+1)	Map205	118 kDa	1	1	6	4
GM13963p OS=Drosophila melanogaster OX=7227 GN=Fib-RA PE=2 SV=1	E4NKN3 (+1)	Fib-RA	35 kDa	0		6	6
Fmr1, isoform G OS=Drosophila melanogaster OX=7227 GN=Fmr1 PE=1 SV=1	A0A0B4K618 (+3)	Fmr1	81 kDa	0		7	4
Ran-binding protein M, isoform E OS=Drosophila melanogaster OX=7227 GN=RanBPM PE=1 SV=1	A0A0B4K851 (+5)	RanBPM	107 kDa	0		7	6
SR protein kinase, isoform D OS=Drosophila melanogaster OX=7227 GN=SRPK PE=1 SV=1	A0A0B4KF69 (+3)	SRPK	103 kDa	0		7	5
Sodium/potassium-transporting ATPase subunit alpha OS=Drosophila melanogaster OX=7227 GN=Atpalpha PE=1 SV=1	A0A0B4KGG8 (+6)	Atpalpha	111 kDa	0		7	6
Puffyeye, isoform G OS=Drosophila melanogaster OX=7227 GN=puf PE=1 SV=1	A0A0B4KHF3 (+4)	puf	441 kDa	0		7	5
Receptor mediated endocytosis 8, isoform B OS=Drosophila melanogaster OX=7227 GN=Rme-8 PE=1 SV=1	A0A0B4LFW6 (+1)	Rme-8	272 kDa	0		7	7
Uncharacterized protein, isoform B OS=Drosophila melanogaster OX=7227 GN=Dmel\CG5554 PE=1 SV=1	A0A0B4LHC9 (+1)	Dmel	37 kDa	0		7	3
MIP06027p1 OS=Drosophila melanogaster OX=7227 GN=l(2)tid-RB PE=2 SV=1	A0A0F7J3E9 (+1)	l	56 kDa	0		7	7
FI20236p1 OS=Drosophila melanogaster OX=7227 GN=SMAP PE=1 SV=1	A1Z7K6 (+1)	SMAP	55 kDa	0		7	5
COP9 signalosome subunit 4, isoform B OS=Drosophila melanogaster OX=7227 GN=CSN4 PE=1 SV=1	E1JH01 (+1)	CSN4	46 kDa	0		7	7
Mars, isoform B OS=Drosophila melanogaster OX=7227 GN=mars PE=1 SV=1	E1JH57 (+1)	mars	102 kDa	0		0
Dynein light chain OS=Drosophila melanogaster OX=7227 GN=ctp PE=2 SV=1	M9NDP1 (+1)	ctp	10 kDa	0		7	4
Ubr1 ubiquitin ligase, isoform B OS=Drosophila melanogaster OX=7227 GN=Ubr1 PE=4 SV=1	M9NFA7 (+1)	Ubr1	208 kDa	0		7	4
Protein swallow OS=Drosophila melanogaster OX=7227 GN=swa PE=1 SV=1	P40688	swa	62 kDa	0		7	5
Putative peptidyl-prolyl cis-trans isomerase dodo OS=Drosophila melanogaster OX=7227 GN=dod PE=2 SV=3	P54353	dod	18 kDa	0		7	6
Ran binding protein 7 OS=Drosophila melanogaster OX=7227 GN=msk PE=2 SV=1	Q7KIF8 (+2)	msk	119 kDa	0		7	6
LD07532p (Fragment) OS=Drosophila melanogaster OX=7227 GN=wal PE=2 SV=1	Q7KLW5 (+1)	wal	35 kDa	0		7	5
Glutathione peroxidase OS=Drosophila melanogaster OX=7227 GN=CG12013 PE=2 SV=1	Q86NS7 (+3)	CG12013	26 kDa	0		7	5
40S ribosomal protein S7 OS=Drosophila melanogaster OX=7227 GN=RpS7 PE=1 SV=2	Q8IMI7 (+1)	RpS7	22 kDa	0		7	6
26S proteasome non-ATPase regulatory subunit 14 OS=Drosophila melanogaster OX=7227 GN=Rpn11 PE=1 SV=1	Q9V3H2	Rpn11	34 kDa	0		7	6
Protein SEC13 homolog OS=Drosophila melanogaster OX=7227 GN=Sec13 PE=1 SV=1	Q9V3J4	Sec13	40 kDa	0		7	5
LD43819p OS=Drosophila melanogaster OX=7227 GN=Dmel\CG1416 PE=1 SV=2	Q9V9Q4	Dmel	40 kDa	0		7	6
LD40758p OS=Drosophila melanogaster OX=7227 GN=Rassf PE=1 SV=3	Q9VCQ7	Rassf	90 kDa	0		7	6
Glutamate carrier 1, isoform A OS=Drosophila melanogaster OX=7227 GN=GC1 PE=1 SV=1	Q9VGF7	GC1	35 kDa	0		7	6
Aspartyl-tRNA synthetase, mitochondrial, isoform A OS=Drosophila melanogaster OX=7227 GN=AspRS-m PE=1 SV=3	Q9VJH2	AspRS-m	122 kDa	0		7	6
GH25425p OS=Drosophila melanogaster OX=7227 GN=Dmel\CG6180 PE=1 SV=2	Q9VK60	Dmel	29 kDa	0		7	5
Protein krasavietz OS=Drosophila melanogaster OX=7227 GN=kra PE=1 SV=1	Q9VNE2	kra	49 kDa	0		7	5
Cytochrome b-c1 complex subunit Rieske, mitochondrial OS=Drosophila melanogaster OX=7227 GN=RFeSP PE=1 SV=3	Q9VQ29	RFeSP	25 kDa	0		7	4
BcDNA.LD24702 OS=Drosophila melanogaster OX=7227 GN=spd-2 PE=1 SV=2	Q9VV79	spd-2	125 kDa	0		7	4
Probable arginine--tRNA ligase, cytoplasmic OS=Drosophila melanogaster OX=7227 GN=ArgRS PE=2 SV=1	Q9VXN4	ArgRS	76 kDa	0		7	7
BcDNA.GH02220 OS=Drosophila melanogaster OX=7227 GN=BcDNA:GH02220 PE=2 SV=1	Q9Y171	BcDNA	49 kDa	0		7	5
GEO09636p1 OS=Drosophila melanogaster OX=7227 GN=RpS29 PE=1 SV=1	A0A0C4DHE8 (+2)	RpS29	7 kDa	0		7	3
Protein dpy-30 homolog OS=Drosophila melanogaster OX=7227 GN=Dpy-30L1 PE=1 SV=1	Q9VKQ9	Dpy-30L1	14 kDa	0		7	2
Succinate--CoA ligase [ADP/GDP-forming] subunit alpha, mitochondrial OS=Drosophila melanogaster OX=7227 GN=Scsalpha1 PE=2 SV=3	Q94522	Scsalpha1	34 kDa	0		7	2
AT05639p OS=Drosophila melanogaster OX=7227 GN=sip2-RD PE=2 SV=1	C8VV39 (+5)	sip2-RD	69 kDa	7	2	0
Thioredoxin-2 OS=Drosophila melanogaster OX=7227 GN=Trx-2 PE=1 SV=3	Q9V429	Trx-2	12 kDa	1	1	2	2
Smrter, isoform G OS=Drosophila melanogaster OX=7227 GN=Smr PE=1 SV=1	M9PGZ8 (+2)	Smr	380 kDa	0	0	2	1
60S ribosomal protein L27 OS=Drosophila melanogaster OX=7227 GN=RpL27 PE=1 SV=1	Q9VBN5	RpL27	16 kDa	0		5	3
Bloom syndrome protein homolog OS=Drosophila melanogaster OX=7227 GN=Blm PE=1 SV=1	Q9VGI8	Blm	166 kDa	4	1	0
Peptidyl-prolyl cis-trans isomerase OS=Drosophila melanogaster OX=7227 GN=CG2852-RA PE=2 SV=1	E4NKJ7 (+1)	CG2852-RA	13 kDa	2	1	4	3
Superoxide dismutase [Cu-Zn] OS=Drosophila melanogaster OX=7227 GN=Sod1 PE=1 SV=2	P61851	Sod1	16 kDa	0		5	5
GH15225p OS=Drosophila melanogaster OX=7227 GN=Ulp1 PE=1 SV=1	Q9VWK5	Ulp1	172 kDa	0		6	4
Glutamate dehydrogenase, mitochondrial OS=Drosophila melanogaster OX=7227 GN=Gdh PE=1 SV=2	P54385	Gdh	63 kDa	0		5	4
AT13736p OS=Drosophila melanogaster OX=7227 GN=UQCR-Q PE=1 SV=1	Q9VVH5	UQCR-Q	10 kDa	0		5	5
Secretory 24AB, isoform C OS=Drosophila melanogaster OX=7227 GN=Sec24AB PE=1 SV=1	A0A0B4LEK8 (+1)	Sec24AB	127 kDa	0		6	5
Kinesin-like protein OS=Drosophila melanogaster OX=7227 GN=ncd PE=1 SV=1	A0A0B4LI25 (+8)	ncd	77 kDa	0		6	4
Precocious dissociation of sisters 5, isoform A OS=Drosophila melanogaster OX=7227 GN=pds5 PE=1 SV=1	A1Z8S6	pds5	139 kDa	0		6	4
GM15464p OS=Drosophila melanogaster OX=7227 GN=CG30122-RB PE=2 SV=1	C7LAA5 (+1)	CG30122-RB	121 kDa	0		6	5
LP19279p OS=Drosophila melanogaster OX=7227 GN=Sec61alpha-RA PE=2 SV=1	F0JAP1 (+1)	Sec61alpha-RA	46 kDa	0		6	4
Triosephosphate isomerase (Fragment) OS=Drosophila melanogaster OX=7227 GN=tpi PE=2 SV=1	K7Z7Z8 (+1)	tpi	17 kDa	0		6	4
Ubiquitin carboxyl-terminal hydrolase OS=Drosophila melanogaster OX=7227 GN=Uch PE=3 SV=1	M9MRD0 (+2)	Uch	26 kDa	0		6	3
Uncharacterized protein, isoform C OS=Drosophila melanogaster OX=7227 GN=ESTS:34F4T PE=1 SV=1	M9PF61 (+3)	ESTS	40 kDa	0		6	4
Brahma, isoform E OS=Drosophila melanogaster OX=7227 GN=brm PE=4 SV=1	M9PFS6 (+1)	brm	187 kDa	0		6	5
FI01544p OS=Drosophila melanogaster OX=7227 GN=Rab1 PE=1 SV=1	O18332	Rab1	23 kDa	0		6	5
Protein aubergine OS=Drosophila melanogaster OX=7227 GN=aub PE=1 SV=1	O76922	aub	99 kDa	0		6	5
Proliferating cell nuclear antigen OS=Drosophila melanogaster OX=7227 GN=PCNA PE=1 SV=2	P17917	PCNA	29 kDa	0		6	5
Succinate dehydrogenase [ubiquinone] iron-sulfur subunit, mitochondrial OS=Drosophila melanogaster OX=7227 GN=SdhB PE=2 SV=2	P21914	SdhB	34 kDa	0		6	4
Alcohol dehydrogenase class-3 OS=Drosophila melanogaster OX=7227 GN=Fdh PE=1 SV=3	P46415	Fdh	40 kDa	0		6	4
FI05451p OS=Drosophila melanogaster OX=7227 GN=SCaMC PE=1 SV=1	Q0E8F2	SCaMC	65 kDa	0		6	5
ATP-dependent RNA helicase WM6 OS=Drosophila melanogaster OX=7227 GN=Hel25E PE=1 SV=1	Q27268	Hel25E	49 kDa	0		6	5
Dolichyl-diphosphooligosaccharide--protein glycosyltransferase subunit 1 (Fragment) OS=Drosophila melanogaster OX=7227 GN=rho-5 PE=2 SV=1	Q6NP35 (+2)	rho-5	52 kDa	0		6	5
Brahma associated protein 55kD OS=Drosophila melanogaster OX=7227 GN=Bap55 PE=1 SV=1	Q7K012	Bap55	47 kDa	0		6	6
Nuclear pore complex protein Nup50 OS=Drosophila melanogaster OX=7227 GN=Nup50 PE=2 SV=1	Q7K0D8	Nup50	59 kDa	0		6	6
26S proteasome regulatory complex subunit p39A OS=Drosophila melanogaster OX=7227 GN=Rpn9 PE=1 SV=1	Q7KMP8	Rpn9	44 kDa	0		6	5
Uncharacterized protein, isoform D OS=Drosophila melanogaster OX=7227 GN=CG14730 PE=1 SV=2	Q7KSN8 (+1)	CG14730	172 kDa	0		6	4
RNA-binding protein lark OS=Drosophila melanogaster OX=7227 GN=lark PE=1 SV=1	Q94901	lark	40 kDa	0		6	6
Cyclin G OS=Drosophila melanogaster OX=7227 GN=CycG PE=1 SV=1	Q95TJ9	CycG	63 kDa	0		6	6
FI21236p1 OS=Drosophila melanogaster OX=7227 GN=rump PE=1 SV=1	Q9VHC7	rump	67 kDa	0		6	4
GM01519p OS=Drosophila melanogaster OX=7227 GN=Dmel\CG9248 PE=1 SV=1	Q9VIF2	Dmel	56 kDa	0		6	5
LD24839p OS=Drosophila melanogaster OX=7227 GN=Dmel\CG15141 PE=1 SV=1	Q9VJE3	Dmel	46 kDa	0		6	5
LD24832p OS=Drosophila melanogaster OX=7227 GN=ufd2 PE=1 SV=1	Q9VK44	ufd2	139 kDa	0		6	6
Enhancer of mRNA-decapping protein 4 homolog OS=Drosophila melanogaster OX=7227 GN=Ge-1 PE=1 SV=2	Q9VKK1	Ge-1	149 kDa	0		6	5
RIP-like protein OS=Drosophila melanogaster OX=7227 GN=Ripalpha PE=2 SV=1	Q9VL31	Ripalpha	23 kDa	0		6	6
ATP synthase, delta subunit, isoform A OS=Drosophila melanogaster OX=7227 GN=ATPsyndelta PE=1 SV=1	Q9W2X6	ATPsyndelta	17 kDa	0		6	4
Regulator of cullins 1a, isoform C OS=Drosophila melanogaster OX=7227 GN=Roc1a PE=4 SV=2	B7Z114 (+2)	Roc1a	16 kDa	0		6	2
Protein Peter pan OS=Drosophila melanogaster OX=7227 GN=ppan PE=1 SV=1	Q9VDE5	ppan	53 kDa	6	1	0
Serine/threonine-protein kinase hippo OS=Drosophila melanogaster OX=7227 GN=hpo PE=1 SV=1	|#DECOY#Q8T0S6|HIPPO_DROME-DECOY		?	0		6	1
Pre-mRNA-splicing factor CWC22 homolog OS=Drosophila melanogaster OX=7227 GN=ncm PE=1 SV=3	Q9VJ87	ncm	152 kDa	1	1	3	2
Moesin, isoform L OS=Drosophila melanogaster OX=7227 GN=Moe PE=1 SV=1	M9NG50 (+1)	Moe	68 kDa	2	2	3	2
Nucleoporin 153kD, isoform D OS=Drosophila melanogaster OX=7227 GN=Nup153 PE=1 SV=1	A8JV18 (+1)	Nup153	201 kDa	1	1	4	4
Splicing factor SRp54 OS=Drosophila melanogaster OX=7227 GN=Srp54 PE=2 SV=3	O61646 (+1)	Srp54	58 kDa	1	1	4	4
LP08340p (Fragment) OS=Drosophila melanogaster OX=7227 PE=2 SV=1	A9UNH0 (+2)		72 kDa	1	1	0
3-hydroxyacyl-CoA dehydrogenase type-2 OS=Drosophila melanogaster OX=7227 GN=scu PE=1 SV=1	O18404	scu	27 kDa	1	1	4	4
Dumpy, isoform V OS=Drosophila melanogaster OX=7227 GN=dpy PE=4 SV=1	|#DECOY#M9PB31|M9PB31_DROME-DECOY		?	0	0	2	2
GEO09637p1 OS=Drosophila melanogaster OX=7227 GN=RpL37A PE=2 SV=1	M9MRF2 (+1)	RpL37A	10 kDa	0		3	3
Centrosome-associated zinc finger protein CP190 OS=Drosophila melanogaster OX=7227 GN=Cp190 PE=1 SV=2	Q24478	Cp190	122 kDa	4	2	0
Ran GTPase activating protein OS=Drosophila melanogaster OX=7227 GN=RanGAP PE=4 SV=1	A0A0E3T479 (+1)	RanGAP	66 kDa	0		5	4
Valyl-tRNA synthetase, isoform C OS=Drosophila melanogaster OX=7227 GN=ValRS PE=1 SV=1	A0A0B4KF06 (+3)	ValRS	119 kDa	0		5	4
GEO07409p1 (Fragment) OS=Drosophila melanogaster OX=7227 PE=2 SV=1	A0A1B2AJV1 (+1)		12 kDa	0		5	3
Pre-mRNA processing factor 8 OS=Drosophila melanogaster OX=7227 GN=Prp8 PE=1 SV=1	A1Z8U0	Prp8	280 kDa	0		5	4
AT13927p OS=Drosophila melanogaster OX=7227 GN=Trp1 PE=1 SV=1	C6SV41 (+4)	Trp1	45 kDa	5	3	0
GEO07866p1 OS=Drosophila melanogaster OX=7227 GN=RpS15Aa PE=1 SV=1	E1JJM9 (+1)	RpS15Aa	15 kDa	0		5	4
Ranbp16, isoform E OS=Drosophila melanogaster OX=7227 GN=Ranbp16 PE=4 SV=1	M9MS57 (+2)	Ranbp16	124 kDa	0		5	5
CENP-meta, isoform E OS=Drosophila melanogaster OX=7227 GN=cmet PE=1 SV=1	M9PCX3 (+4)	cmet	251 kDa	0		5	5
Alien, isoform D OS=Drosophila melanogaster OX=7227 GN=alien PE=4 SV=1	M9PFB5 (+1)	alien	52 kDa	0		5	4
Uncharacterized protein, isoform B OS=Drosophila melanogaster OX=7227 GN=CG40016 PE=1 SV=1	M9PGG8 (+1)	CG40016	21 kDa	0		5	4
Su(P) protein OS=Drosophila melanogaster OX=7227 GN=Su(P) PE=4 SV=1	O77287 (+2)	Su	47 kDa	0		5	4
GTP-binding protein 128up OS=Drosophila melanogaster OX=7227 GN=128up PE=2 SV=2	P32234	128up	41 kDa	0		5	5
CDC27Dm OS=Drosophila melanogaster OX=7227 GN=Cdc27 PE=2 SV=1	Q24021 (+1)	Cdc27	98 kDa	0		5	5
Nuclear pore glycoprotein p62 OS=Drosophila melanogaster OX=7227 GN=Nup62 PE=2 SV=1	Q7JXF5	Nup62	41 kDa	0		5	4
Dynactin 4, p62 subunit OS=Drosophila melanogaster OX=7227 GN=DCTN4-p62 PE=1 SV=1	Q7K130	DCTN4-p62	58 kDa	0		5	5
VAMP-associated protein 33kDa, isoform A OS=Drosophila melanogaster OX=7227 GN=Vap33 PE=1 SV=1	Q7KVX5 (+1)	Vap33	27 kDa	0		5	4
Arginine methyltransferase 3, isoform B OS=Drosophila melanogaster OX=7227 GN=Art3 PE=1 SV=1	Q8INE8 (+1)	Art3	54 kDa	0		5	4
SD04925p OS=Drosophila melanogaster OX=7227 GN=CG5608 PE=2 SV=1	Q8T989 (+1)	CG5608	78 kDa	0		5	4
Asparaginyl-tRNA synthetase, isoform A OS=Drosophila melanogaster OX=7227 GN=AsnRS PE=1 SV=1	Q9V434	AsnRS	64 kDa	0		5	4
RuvB-like helicase 1 OS=Drosophila melanogaster OX=7227 GN=pont PE=1 SV=1	Q9VH07	pont	50 kDa	0		5	5
UDP-glucuronosyltransferase OS=Drosophila melanogaster OX=7227 GN=Ugt36E1 PE=2 SV=2	Q9VJ45	Ugt36E1	58 kDa	0		5	4
RH51633p OS=Drosophila melanogaster OX=7227 GN=CG6089 PE=1 SV=1	Q9VKM8	CG6089	26 kDa	0		5	4
Replication factor C subunit 3 OS=Drosophila melanogaster OX=7227 GN=RfC3 PE=1 SV=2	Q9VKW3	RfC3	37 kDa	0		5	5
HEAT repeat-containing protein 1 homolog OS=Drosophila melanogaster OX=7227 GN=l(2)k09022 PE=2 SV=2	Q9VM75	l	237 kDa	0		5	5
Histone PARylation factor 1-like OS=Drosophila melanogaster OX=7227 GN=CG1218 PE=1 SV=2	Q9VNI3	CG1218	51 kDa	0		5	3
Cytochrome c1, isoform A OS=Drosophila melanogaster OX=7227 GN=Cyt-c1 PE=1 SV=1	Q9VRL0	Cyt-c1	34 kDa	0		5	4
Uncharacterized protein, isoform B OS=Drosophila melanogaster OX=7227 GN=Fatp3 PE=1 SV=1	Q9W185	Fatp3	74 kDa	0		5	5
LD24105p OS=Drosophila melanogaster OX=7227 GN=Dmel\CG10932 PE=1 SV=1	Q9W3N9	Dmel	43 kDa	0		5	5
RE55992p (Fragment) OS=Drosophila melanogaster OX=7227 PE=2 SV=1	Q6IDG2 (+1)		30 kDa	0		5	3
40S ribosomal protein S27 OS=Drosophila melanogaster OX=7227 GN=RpS27 PE=1 SV=1	Q9VBU9	RpS27	9 kDa	0		5	3
CDGSH iron-sulfur domain-containing protein 2 homolog OS=Drosophila melanogaster OX=7227 GN=Cisd2 PE=2 SV=1	Q9VAM6	Cisd2	15 kDa	0		5	3
CG10206 protein OS=Drosophila melanogaster OX=7227 GN=CG10206 PE=4 SV=1	A0ANY9 (+3)	CG10206	57 kDa	0		5	3
Casein kinase IIalpha, isoform C OS=Drosophila melanogaster OX=7227 GN=CkIIalpha PE=1 SV=1	A4V2B8 (+1)	CkIIalpha	40 kDa	0		5	3
Ubiquitin conjugating enzyme E2M, isoform B OS=Drosophila melanogaster OX=7227 GN=UbcE2M PE=3 SV=1	M9PBW0 (+1)	UbcE2M	21 kDa	0		5	3
GEO11443p1 OS=Drosophila melanogaster OX=7227 GN=UQCR-6.4 PE=2 SV=1	Q500Y7	UQCR-6	6 kDa	0		5	2
RH49324p (Fragment) OS=Drosophila melanogaster OX=7227 GN=COX5B PE=2 SV=1	Q86NN8 (+1)	COX5B	18 kDa	0		5	2
LP07287p OS=Drosophila melanogaster OX=7227 GN=Dmel\CG14894 PE=1 SV=2	Q9VEV3	Dmel	29 kDa	5	2	0
Eukaryotic translation initiation factor 3 subunit F-1 OS=Drosophila melanogaster OX=7227 GN=eIF3f1 PE=2 SV=1	Q9VN50	eIF3f1	31 kDa	0		5	2
LP05220p OS=Drosophila melanogaster OX=7227 GN=Sec24CD PE=1 SV=2	Q9VQ94	Sec24CD	129 kDa	0		5	2
FI21453p1 OS=Drosophila melanogaster OX=7227 GN=Tnpo PE=1 SV=1	Q9VRV8	Tnpo	102 kDa	0		5	2
Nuclear pore complex protein Nup75 OS=Drosophila melanogaster OX=7227 GN=Nup75 PE=3 SV=1	A1YK00 (+7)	Nup75	77 kDa	0		5	2
Serine/threonine-protein phosphatase OS=Drosophila melanogaster OX=7227 GN=CanA-14F PE=3 SV=1	M9NEL1 (+1)	CanA-14F	64 kDa	0		5	2
Acetyl-CoA carboxylase, isoform A OS=Drosophila melanogaster OX=7227 GN=ACC PE=1 SV=1	A1Z784	ACC	279 kDa	0		5	1
LP10445p OS=Drosophila melanogaster OX=7227 GN=Dmel\CG8300 PE=1 SV=1	Q9W3S3	Dmel	20 kDa	5	1	0
IP17475p OS=Drosophila melanogaster OX=7227 PE=2 SV=1	A1A735 (+1)		39 kDa	5	1	0
Uncharacterized protein, isoform F OS=Drosophila melanogaster OX=7227 GN=anon-EST:fe1A7 PE=1 SV=2	A8JNI2 (+3)	anon-EST	186 kDa	1	1	2	2
Probable rRNA-processing protein EBP2 homolog OS=Drosophila melanogaster OX=7227 GN=CG1542 PE=2 SV=1	Q9V9Z9	CG1542	35 kDa	3	1	1	1
IF2 protein OS=Drosophila melanogaster OX=7227 GN=eIF5B PE=2 SV=1	Q9NJH7	eIF5B	127 kDa	3	1	1	1
Cheerio, isoform I OS=Drosophila melanogaster OX=7227 GN=cher PE=1 SV=1	A0A0B4JCY6 (+5)	cher	243 kDa	3	1	0
Dynamin associated protein 160, isoform G OS=Drosophila melanogaster OX=7227 GN=Dap160 PE=1 SV=1	M9PBF6 (+6)	Dap160	120 kDa	3	1	0
Synapse-associated protein of 47 kDa OS=Drosophila melanogaster OX=7227 GN=Sap47 PE=1 SV=1	Q960T2 (+1)	Sap47	57 kDa	3	1	0
Uncharacterized protein CG1677 OS=Drosophila melanogaster OX=7227 GN=CG1677 PE=4 SV=1	Q0E5N1 (+13)	CG1677	109 kDa	0		3	3
Antimeros, isoform A OS=Drosophila melanogaster OX=7227 GN=atms PE=1 SV=1	Q9VN55	atms	61 kDa	1	1	3	3
Microtubule associated protein OS=Drosophila melanogaster OX=7227 GN=msps PE=4 SV=1	Q9U5W6	msps	227 kDa	0		2	2
Zinc finger matrin-type protein CG9776 OS=Drosophila melanogaster OX=7227 GN=CG9776 PE=1 SV=1	Q9V468	CG9776	140 kDa	0		3	2
Malate dehydrogenase OS=Drosophila melanogaster OX=7227 GN=Mdh1 PE=2 SV=1	Q8MQS7 (+1)	Mdh1	36 kDa	3	1	0
DNA polymerase epsilon catalytic subunit OS=Drosophila melanogaster OX=7227 GN=DNApol-epsilon PE=3 SV=1	G3M399 (+1)	DNApol-epsilon	257 kDa	0		2	2
TA01007p (Fragment) OS=Drosophila melanogaster OX=7227 GN=RpL36A-RA PE=2 SV=1	C5WLN8 (+2)	RpL36A-RA	14 kDa	0		3	2
Circadian trip, isoform E OS=Drosophila melanogaster OX=7227 GN=ctrip PE=1 SV=1	A0A0B4JCV6 (+11)	ctrip	314 kDa	0		4	4
Zipper, isoform F OS=Drosophila melanogaster OX=7227 GN=zip PE=1 SV=1	A0A0B4JD57 (+5)	zip	228 kDa	0		4	4
Centrosomin, isoform M OS=Drosophila melanogaster OX=7227 GN=cnn PE=1 SV=1	A0A0B4K7N9 (+4)	cnn	127 kDa	0		4	4
Mahjong, isoform B OS=Drosophila melanogaster OX=7227 GN=mahj PE=4 SV=1	A0A0B4K8A5 (+1)	mahj	172 kDa	0		4	4
Protein clueless OS=Drosophila melanogaster OX=7227 GN=clu PE=1 SV=1	A0A0B4KEX0 (+1)	clu	145 kDa	0		4	4
Secretory 31, isoform C OS=Drosophila melanogaster OX=7227 GN=Sec31 PE=1 SV=1	A0A0B4LEY1 (+4)	Sec31	138 kDa	0		4	4
Hyperplastic discs, isoform B OS=Drosophila melanogaster OX=7227 GN=hyd PE=1 SV=1	A0A0B4LGZ6 (+2)	hyd	319 kDa	0		4	3
GEO07404p1 (Fragment) OS=Drosophila melanogaster OX=7227 PE=2 SV=1	A0A1B3Q3N5 (+1)		13 kDa	0		4	3
Protein PTCD3 homolog, mitochondrial OS=Drosophila melanogaster OX=7227 GN=CG4679 PE=2 SV=1	A1Z9A8 (+1)	CG4679	74 kDa	0		4	4
FI16628p1 OS=Drosophila melanogaster OX=7227 GN=Dmel\CG18190 PE=1 SV=2	A1ZBF1 (+1)	Dmel	29 kDa	0		4	4
Cyclin E, isoform C OS=Drosophila melanogaster OX=7227 GN=CycE PE=3 SV=1	A4V0R4 (+2)	CycE	77 kDa	0		4	3
AT08049p OS=Drosophila melanogaster OX=7227 GN=Dmel\CG1440 PE=1 SV=1	A8JV22 (+2)	Dmel	58 kDa	0		4	3
MIP06744p OS=Drosophila melanogaster OX=7227 GN=raptor-RA PE=2 SV=1	C3KKC3 (+1)	raptor-RA	177 kDa	0		4	4
Hoi-polloi, isoform B OS=Drosophila melanogaster OX=7227 GN=hoip PE=1 SV=1	D2NUK9 (+1)	hoip	14 kDa	0		4	3
FI18603p1 OS=Drosophila melanogaster OX=7227 GN=CG12163-RB PE=2 SV=1	H5V8F3 (+1)	CG12163-RB	54 kDa	0		4	4
Adenosylhomocysteinase OS=Drosophila melanogaster OX=7227 GN=Ahcy PE=3 SV=1	M9PHN8 (+2)	Ahcy	36 kDa	0		4	3
Inorganic pyrophosphatase OS=Drosophila melanogaster OX=7227 GN=Nurf-38 PE=1 SV=3	O77460	Nurf-38	38 kDa	0		4	4
GH07456p OS=Drosophila melanogaster OX=7227 GN=RpII33 PE=1 SV=1	O97183	RpII33	31 kDa	0		4	4
Eukaryotic translation initiation factor 2B subunit delta, isoform B OS=Drosophila melanogaster OX=7227 GN=eIF2Bdelta PE=1 SV=1	Q0E8X6 (+3)	eIF2Bdelta	62 kDa	0		4	4
DNA primase small subunit OS=Drosophila melanogaster OX=7227 GN=DNApol-alpha50 PE=2 SV=2	Q24317	DNApol-alpha50	50 kDa	0		4	3
GH15157p OS=Drosophila melanogaster OX=7227 GN=Rcd-1 PE=1 SV=1	Q7JVP2	Rcd-1	34 kDa	0		4	4
Thioredoxin-like protein TXL OS=Drosophila melanogaster OX=7227 GN=Txl PE=2 SV=1	Q7KMR7 (+1)	Txl	32 kDa	0		4	4
FACT complex subunit spt16 OS=Drosophila melanogaster OX=7227 GN=dre4 PE=1 SV=2	Q8IRG6	dre4	124 kDa	0		4	4
RH42429p OS=Drosophila melanogaster OX=7227 GN=Gabat PE=2 SV=1	Q8MYV0 (+1)	Gabat	55 kDa	0		4	4
Poly(U)-binding-splicing factor half pint OS=Drosophila melanogaster OX=7227 GN=hfp PE=1 SV=2	Q8T6B9	hfp	68 kDa	0		4	4
Set1/Ash2 histone methyltransferase complex subunit ASH2 OS=Drosophila melanogaster OX=7227 GN=ash2 PE=1 SV=2	Q94545	ash2	63 kDa	0		4	4
Another transcription unit protein OS=Drosophila melanogaster OX=7227 GN=Atu PE=1 SV=2	Q94546	Atu	77 kDa	0		4	4
Malic enzyme OS=Drosophila melanogaster OX=7227 GN=Men PE=2 SV=1	Q9NIW1 (+3)	Men	84 kDa	0		4	3
Nuclear protein localization protein 4 homolog OS=Drosophila melanogaster OX=7227 GN=Npl4 PE=1 SV=3	Q9VBP9	Npl4	73 kDa	0		4	4
GH01077p OS=Drosophila melanogaster OX=7227 GN=UQCR-C1 PE=1 SV=2	Q9VFF0	UQCR-C1	52 kDa	0		4	3
LD21074p OS=Drosophila melanogaster OX=7227 GN=Pdcd4 PE=1 SV=2	Q9VY91	Pdcd4	56 kDa	0		4	4
DNA ligase 1 OS=Drosophila melanogaster OX=7227 GN=DNAlig1 PE=1 SV=2	Q9W1H4	DNAlig1	85 kDa	0		4	4
CG9273 protein (Fragment) OS=Drosophila melanogaster OX=7227 GN=CG9273 PE=4 SV=1	A0ANL0 (+4)	CG9273	26 kDa	0		4	3
Nup133 OS=Drosophila melanogaster OX=7227 GN=Nup133 PE=4 SV=1	A1YK77 (+9)	Nup133	135 kDa	0		4	4
Calcium/calmodulin-dependent protein kinase II, isoform C OS=Drosophila melanogaster OX=7227 GN=CaMKII PE=1 SV=1	A4V133 (+8)	CaMKII	55 kDa	0		4	4
Phosphatidylinositol-4,5-bisphosphate 4-phosphatase (Fragment) OS=Drosophila melanogaster OX=7227 GN=CG6707-RB PE=2 SV=1	C6SUZ8 (+2)	CG6707-RB	26 kDa	0		4	3
X16 splicing factor, isoform B OS=Drosophila melanogaster OX=7227 GN=x16 PE=1 SV=1	M9PC85 (+1)	x16	28 kDa	0		4	3
FI02843p OS=Drosophila melanogaster OX=7227 GN=fzy PE=2 SV=1	Q24044 (+1)	fzy	57 kDa	0		4	3
Signal recognition particle subunit SRP72 OS=Drosophila melanogaster OX=7227 GN=Srp72 PE=2 SV=1	Q5BHY9 (+1)	Srp72	73 kDa	0		4	4
RE01954p OS=Drosophila melanogaster OX=7227 GN=row PE=1 SV=1	Q5U156	row	144 kDa	0		4	3
LD46360p OS=Drosophila melanogaster OX=7227 GN=Acn PE=2 SV=1	Q8MRH4 (+1)	Acn	66 kDa	0		4	3
RH63365p OS=Drosophila melanogaster OX=7227 GN=Dpck PE=2 SV=1	Q8SWY7 (+1)	Dpck	27 kDa	0		4	3
LD43460p OS=Drosophila melanogaster OX=7227 GN=Trap1 PE=2 SV=1	Q8MSU6	Trap1	40 kDa	0		4	3
Krueppel homolog 2 OS=Drosophila melanogaster OX=7227 GN=Kr-h2 PE=1 SV=1	Q9V447 (+1)	Kr-h2	31 kDa	0		4	3
DNA-directed RNA polymerases I, II, and III subunit RPABC3 OS=Drosophila melanogaster OX=7227 GN=Rpb8 PE=1 SV=1	Q9VNZ3	Rpb8	17 kDa	0		4	3
CCR4-NOT transcription complex subunit 4, isoform H OS=Drosophila melanogaster OX=7227 GN=Cnot4 PE=1 SV=1	M9MRH8 (+5)	Cnot4	117 kDa	0		4	3
Probable glutamine--tRNA ligase OS=Drosophila melanogaster OX=7227 GN=Aats-gln PE=2 SV=1	Q9Y105	Aats-gln	88 kDa	0		4	3
Eukaryotic initiation factor eIF2B alpha subunit OS=Drosophila melanogaster OX=7227 GN=eIF2Balpha PE=2 SV=1	Q9GQ89 (+1)	eIF2Balpha	34 kDa	0		4	4
AT13091p OS=Drosophila melanogaster OX=7227 GN=rngo PE=1 SV=1	Q9VXF9	rngo	51 kDa	0		4	3
Phosphoglycerate mutase (Fragment) OS=Drosophila melanogaster OX=7227 GN=Pglym78 PE=3 SV=1	A5XD83 (+6)	Pglym78	29 kDa	0		4	3
Uncharacterized protein OS=Drosophila melanogaster OX=7227 PE=2 SV=1	Q8WQ62 (+1)		22 kDa	0		4	3
Putative U5 small nuclear ribonucleoprotein 200 kDa helicase OS=Drosophila melanogaster OX=7227 GN=l(3)72Ab PE=2 SV=4	Q9VUV9	l	245 kDa	0		4	3
Kinesin-like protein Klp61F OS=Drosophila melanogaster OX=7227 GN=Klp61F PE=1 SV=2	P46863 (+2)	Klp61F	121 kDa	0		4	3
AXIN1 up-regulated 1, isoform A OS=Drosophila melanogaster OX=7227 GN=Axud1 PE=2 SV=1	Q9U4G5	Axud1	91 kDa	0		0
Nascent polypeptide associated complex protein alpha subunit, isoform D OS=Drosophila melanogaster OX=7227 GN=Nacalpha PE=4 SV=1	A0A0B4LEY6 (+1)	Nacalpha	23 kDa	0		4	3
IP03264p OS=Drosophila melanogaster OX=7227 GN=CG14036-RA PE=2 SV=1	B7FNL5 (+2)	CG14036-RA	11 kDa	0		4	3
Imitation SWI OS=Drosophila melanogaster OX=7227 GN=ISWI PE=3 SV=1	I1V4Y8 (+1)	ISWI	118 kDa	0		4	3
LD45152p OS=Drosophila melanogaster OX=7227 GN=Sf3b2 PE=1 SV=2	Q9VQK7	Sf3b2	85 kDa	0		4	3
Lethal (2) k09913, isoform F OS=Drosophila melanogaster OX=7227 GN=l(2)k09913 PE=1 SV=1	A0A0B4LG95 (+3)	l	44 kDa	0		4	3
Brahma-associated protein 111kD OS=Drosophila melanogaster OX=7227 GN=Bap111 PE=2 SV=1	Q9BIW6 (+1)	Bap111	79 kDa	0		4	3
LP02641p OS=Drosophila melanogaster OX=7227 GN=Dmel\CG17754 PE=2 SV=1	Q7K0L2 (+2)	Dmel	72 kDa	0		0
Jaguar, isoform L OS=Drosophila melanogaster OX=7227 GN=jar PE=1 SV=1	A0A0B4KGX1 (+3)	jar	145 kDa	0		4	3
GEO08239p1 OS=Drosophila melanogaster OX=7227 GN=RpS16 PE=2 SV=1	A0A0B4LG52 (+1)	RpS16	17 kDa	0		4	3
Groucho, isoform F OS=Drosophila melanogaster OX=7227 GN=gro PE=1 SV=1	A0A0B4JD02 (+6)	gro	79 kDa	0		4	2
Non-specific serine/threonine protein kinase OS=Drosophila melanogaster OX=7227 GN=par-1 PE=1 SV=2	A1ZBL5 (+8)	par-1	102 kDa	0		4	2
Armitage OS=Drosophila melanogaster OX=7227 GN=armi PE=4 SV=1	L0CPE8 (+5)	armi	145 kDa	0		4	2
Uncharacterized protein, isoform B OS=Drosophila melanogaster OX=7227 GN=ptdss1 PE=1 SV=1	M9PIC3 (+1)	ptdss1	57 kDa	0		4	2
MIP07211p OS=Drosophila melanogaster OX=7227 GN=Roc2 PE=2 SV=1	Q7JWH5	Roc2	13 kDa	0		4	2
Modifier of mdg4 OS=Drosophila melanogaster OX=7227 GN=mod(mdg4) PE=1 SV=1	Q86B87	mod	67 kDa	0		4	2
RH04607p OS=Drosophila melanogaster OX=7227 GN=CG17593 PE=2 SV=1	Q8SZL8 (+1)	CG17593	54 kDa	0		4	2
RH07106p OS=Drosophila melanogaster OX=7227 GN=Dmel\CG3061 PE=1 SV=1	Q9VFP0	Dmel	42 kDa	0		4	2
Transmembrane 9 superfamily member OS=Drosophila melanogaster OX=7227 GN=TM9SF2 PE=1 SV=1	Q9VIK1	TM9SF2	75 kDa	0		4	2
Heterogeneous nuclear ribonucleoprotein K, isoform C OS=Drosophila melanogaster OX=7227 GN=HnRNP-K PE=1 SV=1	A1ZBW0 (+5)	HnRNP-K	51 kDa	0		4	2
Falafel, isoform E OS=Drosophila melanogaster OX=7227 GN=flfl PE=1 SV=1	A0A0C4DHE6 (+1)	flfl	109 kDa	0		4	2
AT11715p OS=Drosophila melanogaster OX=7227 GN=muskelin PE=2 SV=1	Q8MR83	muskelin	97 kDa	0		4	2
Methionyl-tRNA synthetase OS=Drosophila melanogaster OX=7227 GN=MetRS PE=1 SV=1	A1ZBE9	MetRS	112 kDa	0		4	2
LD26546p OS=Drosophila melanogaster OX=7227 GN=l(1)G0320 PE=1 SV=1	Q9W335	l	33 kDa	0		4	2
Proteasome subunit alpha type-5 OS=Drosophila melanogaster OX=7227 GN=Prosalpha5 PE=2 SV=2	Q95083	Prosalpha5	27 kDa	0		4	2
DNA-directed RNA polymerase subunit OS=Drosophila melanogaster OX=7227 GN=RpII15 PE=1 SV=1	A0A0B4K652 (+2)	RpII15	15 kDa	0		4	2
LD21896p OS=Drosophila melanogaster OX=7227 GN=wus PE=2 SV=1	Q9VX95	wus	46 kDa	0		4	2
Calcineurin B2, isoform B OS=Drosophila melanogaster OX=7227 GN=CanB2 PE=4 SV=1	A0A0B4K833 (+3)	CanB2	19 kDa	0		4	1
D1 chromosomal protein, isoform C OS=Drosophila melanogaster OX=7227 GN=D1 PE=1 SV=1	A4V2K7 (+1)	D1	37 kDa	4	1	0
Uncharacterized protein, isoform B OS=Drosophila melanogaster OX=7227 GN=Dmel\CG6907 PE=4 SV=1	|#DECOY#X2J4N6|X2J4N6_DROME-DECOY		?	0		4	1
Odorant receptor 85e (Fragment) OS=Drosophila melanogaster OX=7227 GN=or85e PE=4 SV=1	|#DECOY#D7F992|D7F992_DROME-DECOY		?	0		4	1
Transforming acidic coiled-coil protein, isoform L OS=Drosophila melanogaster OX=7227 GN=tacc PE=1 SV=1	A0A0B4K6I7 (+3)	tacc	137 kDa	1	1	1	1
Dek, isoform C OS=Drosophila melanogaster OX=7227 GN=Dek PE=1 SV=1	A1ZAK3 (+4)	Dek	72 kDa	2	2	0
RE23444p (Fragment) OS=Drosophila melanogaster OX=7227 GN=Rbp2-RB PE=2 SV=1	E8NH88 (+3)	Rbp2-RB	35 kDa	0		1	1
Chitinase 10, isoform B OS=Drosophila melanogaster OX=7227 GN=Cht10 PE=3 SV=1	M9PGH3 (+1)	Cht10	259 kDa	0		2	1
FI04781p OS=Drosophila melanogaster OX=7227 GN=Nop56 PE=1 SV=1	Q95WY3	Nop56	55 kDa	1	1	2	2
Small ubiquitin-related modifier OS=Drosophila melanogaster OX=7227 GN=smt3 PE=1 SV=1	O97102	smt3	10 kDa	1	1	2	2
Split ends, isoform H OS=Drosophila melanogaster OX=7227 GN=spen PE=1 SV=1	|#DECOY#M9PBZ3|M9PBZ3_DROME-DECOY		?	1	1	0
Uncharacterized protein, isoform B OS=Drosophila melanogaster OX=7227 GN=BEST:LD19244 PE=1 SV=3	Q9VID9	BEST	293 kDa	2	2	0
60S ribosomal protein L10a-2 OS=Drosophila melanogaster OX=7227 GN=RpL10Ab PE=1 SV=2	Q9VTP4	RpL10Ab	24 kDa	0	0	2	1
FI07634p (Fragment) OS=Drosophila melanogaster OX=7227 GN=CG6891-RA PE=2 SV=1	B5RJ68 (+2)	CG6891-RA	30 kDa	2	1	0
SD10043p OS=Drosophila melanogaster OX=7227 GN=Cap-G PE=2 SV=1	|#DECOY#Q7YU89|Q7YU89_DROME-DECOY		?	2	1	0
Homeobox protein invected OS=Drosophila melanogaster OX=7227 GN=inv PE=2 SV=2	P05527	inv	61 kDa	0	0	0
FI06577p OS=Drosophila melanogaster OX=7227 GN=CG5535-RC PE=2 SV=1	B5RJ28 (+3)	CG5535-RC	69 kDa	0		3	3
MIP21378p OS=Drosophila melanogaster OX=7227 PE=2 SV=1	D5AEL7 (+1)		14 kDa	0		3	3
SD19278p OS=Drosophila melanogaster OX=7227 GN=Tim23 PE=1 SV=1	Q8MRW1	Tim23	22 kDa	0		3	3
Structural maintenance of chromosomes protein OS=Drosophila melanogaster OX=7227 GN=SMC1 PE=2 SV=1	Q9N6I4 (+1)	SMC1	143 kDa	0		3	3
Anillin OS=Drosophila melanogaster OX=7227 GN=scra PE=1 SV=3	Q9V4P1	scra	136 kDa	0		3	3
Ubiquitin carboxyl-terminal hydrolase 36 OS=Drosophila melanogaster OX=7227 GN=scny PE=1 SV=3	Q9VRP5	scny	114 kDa	0		3	3
AarF domain containing kinase, isoform A OS=Drosophila melanogaster OX=7227 GN=Adck PE=1 SV=2	Q9W133	Adck	60 kDa	0		3	3
FI02875p (Fragment) OS=Drosophila melanogaster OX=7227 PE=2 SV=1	B5RIJ9 (+2)		14 kDa	0		3	3
FACT complex subunit SSRP1 OS=Drosophila melanogaster OX=7227 GN=Ssrp-RA PE=2 SV=1	B5RJ65 (+1)	Ssrp-RA	82 kDa	0		3	3
Tho2, isoform B OS=Drosophila melanogaster OX=7227 GN=tho2 PE=1 SV=1	E2QCS8 (+2)	tho2	189 kDa	0		3	3
Chromator, isoform A OS=Drosophila melanogaster OX=7227 GN=Chro PE=1 SV=1	Q86BS3 (+1)	Chro	101 kDa	0		3	3
LD28793p OS=Drosophila melanogaster OX=7227 GN=Snu114 PE=1 SV=1	Q9VAX8	Snu114	111 kDa	0		3	3
Burgundy, isoform B OS=Drosophila melanogaster OX=7227 GN=bur PE=1 SV=3	Q9VIE7	bur	77 kDa	0		3	3
Signal recognition particle subunit SRP68 OS=Drosophila melanogaster OX=7227 GN=Srp68 PE=2 SV=1	Q9VSS2	Srp68	69 kDa	0		3	3
LD23155p OS=Drosophila melanogaster OX=7227 GN=Rbpn-5 PE=1 SV=2	Q9W2M0	Rbpn-5	75 kDa	0		3	3
Alcohol dehydrogenase (Fragment) OS=Drosophila melanogaster OX=7227 GN=Adh PE=3 SV=1	A0A077HCQ5 (+2)	Adh	26 kDa	0		3	3
CG6459 protein OS=Drosophila melanogaster OX=7227 GN=CG6459 PE=4 SV=1	A0APE4 (+1)	CG6459	29 kDa	0		3	3
Porin, isoform D OS=Drosophila melanogaster OX=7227 GN=porin PE=4 SV=1	M9PD75 (+1)	porin	31 kDa	0		3	3
EG:86E4.3 protein OS=Drosophila melanogaster OX=7227 GN=Rbcn-3B PE=4 SV=1	O46092 (+2)	Rbcn-3B	162 kDa	0		3	3
Mitosis initiation protein fs(1)Ya OS=Drosophila melanogaster OX=7227 GN=fs(1)Ya PE=1 SV=4	P25028	fs	78 kDa	0		3	3
BcDNA.LD05563 OS=Drosophila melanogaster OX=7227 GN=Gem3 PE=1 SV=1	Q9V3C4	Gem3	117 kDa	0		3	3
Arc42 OS=Drosophila melanogaster OX=7227 GN=Arc42 PE=1 SV=1	Q9VDT1	Arc42	44 kDa	0		3	3
Dipeptidase B, isoform A OS=Drosophila melanogaster OX=7227 GN=Dip-B PE=1 SV=2	Q9VFQ9	Dip-B	56 kDa	0		3	3
LD35209p OS=Drosophila melanogaster OX=7227 GN=Dmel\CG8142 PE=1 SV=2	Q9VX15	Dmel	40 kDa	0		3	3
Amun, isoform A OS=Drosophila melanogaster OX=7227 GN=Amun PE=1 SV=1	Q9VYV4	Amun	58 kDa	0		3	3
LD07278p OS=Drosophila melanogaster OX=7227 GN=Lcch-4D PE=2 SV=1	Q9W4G1	Lcch-4D	60 kDa	0		3	3
Lethal (2) 37Cc, isoform D OS=Drosophila melanogaster OX=7227 GN=l(2)37Cc PE=1 SV=1	A0A023GQA5 (+1)	l	30 kDa	0		3	3
GH24644p OS=Drosophila melanogaster OX=7227 GN=Lnpk PE=1 SV=1	Q7K2N0	Lnpk	44 kDa	0		3	3
FI13085p (Fragment) OS=Drosophila melanogaster OX=7227 GN=rad50-RB PE=2 SV=1	D0Z764 (+1)	rad50-RB	153 kDa	0		3	3
Rho-associated protein kinase OS=Drosophila melanogaster OX=7227 GN=Rok PE=2 SV=1	Q961D4 (+5)	Rok	160 kDa	0		3	3
Uncharacterized protein, isoform N OS=Drosophila melanogaster OX=7227 GN=Dmel\CG5174 PE=1 SV=1	A0A0B4K7G1 (+7)	Dmel	24 kDa	0		3	3
LD28815p OS=Drosophila melanogaster OX=7227 GN=Usp10 PE=1 SV=2	Q9W0L7	Usp10	165 kDa	0		3	3
Prohibitin 2, isoform E OS=Drosophila melanogaster OX=7227 GN=Phb2 PE=1 SV=1	A8DYI6 (+2)	Phb2	37 kDa	0		3	3
Proteasome subunit alpha type-7-1 OS=Drosophila melanogaster OX=7227 GN=Prosalpha4 PE=1 SV=2	P22769	Prosalpha4	28 kDa	0		3	3
Mushroom-body expressed, isoform N OS=Drosophila melanogaster OX=7227 GN=mub PE=1 SV=1	A0A0S0WH03 (+5)	mub	44 kDa	0		3	3
Methionine aminopeptidase OS=Drosophila melanogaster OX=7227 GN=MAP1A PE=1 SV=1	Q9VC48	MAP1A	42 kDa	0		3	3
GH05406p OS=Drosophila melanogaster OX=7227 GN=mRpS30 PE=1 SV=1	Q9VXP3	mRpS30	65 kDa	0		3	3
Vacuolar H[+]-ATPase 55kD subunit, isoform C OS=Drosophila melanogaster OX=7227 GN=Vha55 PE=1 SV=1	E1JIJ5 (+1)	Vha55	55 kDa	0		3	3
Arginine kinase, isoform E OS=Drosophila melanogaster OX=7227 GN=Argk PE=1 SV=1	A8JNP2 (+1)	Argk	42 kDa	0		3	3
RE58623p OS=Drosophila melanogaster OX=7227 GN=Spt-I PE=1 SV=1	Q6NR46	Spt-I	53 kDa	0		3	3
Bicaudal C, isoform B OS=Drosophila melanogaster OX=7227 GN=BicC PE=4 SV=1	E2QCR4 (+1)	BicC	98 kDa	0		3	3
Dihydroorotate dehydrogenase (quinone), mitochondrial OS=Drosophila melanogaster OX=7227 GN=Dhod PE=2 SV=2	P32748	Dhod	44 kDa	0		3	3
RE70278p (Fragment) OS=Drosophila melanogaster OX=7227 GN=CG12304-RA PE=2 SV=1	E4NKL6 (+3)	CG12304-RA	39 kDa	0		3	3
Little imaginal discs, isoform C OS=Drosophila melanogaster OX=7227 GN=lid PE=4 SV=1	M9NEV0 (+1)	lid	204 kDa	0		3	3
Histone acetyltransferase type B catalytic subunit OS=Drosophila melanogaster OX=7227 GN=Hat1 PE=1 SV=1	Q0KIB3 (+1)	Hat1	48 kDa	0		3	3
Atypical protein kinase C, isoform I OS=Drosophila melanogaster OX=7227 GN=aPKC PE=1 SV=1	A0A0B4JD26 (+6)	aPKC	58 kDa	0		3	2
Ste20-like kinase, isoform C OS=Drosophila melanogaster OX=7227 GN=Stlk PE=4 SV=1	A0A0B4K7S5 (+1)	Stlk	40 kDa	0		3	2
CG6554-PA OS=Drosophila melanogaster OX=7227 GN=CG6554 PE=3 SV=1	C0MJ37 (+1)	CG6554	43 kDa	0		3	2
AT02470p OS=Drosophila melanogaster OX=7227 GN=CG7208-RA PE=2 SV=1	C6SUY8 (+2)	CG7208-RA	51 kDa	0		3	2
MIP21173p OS=Drosophila melanogaster OX=7227 GN=Agpat3 PE=1 SV=1	D5AEK7 (+1)	Agpat3	46 kDa	0		3	2
Rab GDP dissociation inhibitor OS=Drosophila melanogaster OX=7227 GN=Gdi PE=2 SV=1	Q24349 (+1)	Gdi	51 kDa	0		3	2
Aurora OS=Drosophila melanogaster OX=7227 GN=aurA PE=2 SV=1	Q27393 (+1)	aurA	47 kDa	0		3	2
Dodeca-satellite-binding protein 1, isoform A OS=Drosophila melanogaster OX=7227 GN=Dp1 PE=1 SV=1	Q7KN75	Dp1	144 kDa	0		3	2
SD16537p OS=Drosophila melanogaster OX=7227 GN=rictor PE=2 SV=1	Q7YU91 (+2)	rictor	214 kDa	0		3	2
Probable N-acetyltransferase san OS=Drosophila melanogaster OX=7227 GN=san PE=1 SV=1	Q9NHD5	san	21 kDa	0		3	2
Translocon-associated protein subunit beta OS=Drosophila melanogaster OX=7227 GN=SsRbeta PE=1 SV=2	Q9VUZ0	SsRbeta	21 kDa	0		3	2
Putative ATP synthase subunit f, mitochondrial OS=Drosophila melanogaster OX=7227 GN=CG4692 PE=3 SV=1	Q9W141	CG4692	12 kDa	0		3	2
Lasp, isoform C OS=Drosophila melanogaster OX=7227 GN=Lasp PE=4 SV=1	M9NDA6 (+1)	Lasp	72 kDa	0		3	2
26S proteasome regulatory complex subunit p30 OS=Drosophila melanogaster OX=7227 GN=Rpn12 PE=1 SV=1	Q9V436	Rpn12	30 kDa	0		3	3
DNApol-iota, isoform A OS=Drosophila melanogaster OX=7227 GN=DNApol-iota PE=2 SV=1	Q9VHV1	DNApol-iota	80 kDa	0		3	2
AaRS-interacting multifunctional protein 3 OS=Drosophila melanogaster OX=7227 GN=AIMP3 PE=1 SV=1	Q8MKK1 (+1)	AIMP3	20 kDa	0		3	2
SD01613p OS=Drosophila melanogaster OX=7227 GN=DmCG6512 PE=1 SV=1	Q8T4G5	DmCG6512	90 kDa	0		3	2
Smallminded protein OS=Drosophila melanogaster OX=7227 GN=smid PE=1 SV=1	P91638 (+2)	smid	104 kDa	0		3	3
IP09655p OS=Drosophila melanogaster OX=7227 GN=Mdh2 PE=1 SV=1	Q9VEB1	Mdh2	35 kDa	0		3	2
DNA-binding protein modulo OS=Drosophila melanogaster OX=7227 GN=mod PE=1 SV=2	P13469	mod	60 kDa	3	2	0
FI09617p (Fragment) OS=Drosophila melanogaster OX=7227 GN=dor-RA PE=2 SV=1	B5RJG2 (+1)	dor-RA	118 kDa	0		3	2
Histone deacetylase 6 isoform A OS=Drosophila melanogaster OX=7227 GN=HDAC6 PE=4 SV=1	C5I798 (+28)	HDAC6	125 kDa	0		3	3
GH07925p OS=Drosophila melanogaster OX=7227 GN=CG3902 PE=2 SV=1	Q95U46 (+1)	CG3902	45 kDa	0		3	2
AT19154p OS=Drosophila melanogaster OX=7227 GN=Scox PE=1 SV=1	Q9VMX4	Scox	28 kDa	0		3	2
ATP synthase subunit b, mitochondrial OS=Drosophila melanogaster OX=7227 GN=ATPsynB PE=2 SV=2	Q94516	ATPsynB	27 kDa	0		3	2
Transcription factor B1, isoform D OS=Drosophila melanogaster OX=7227 GN=Tfb1 PE=4 SV=1	A0A0B4K726 (+1)	Tfb1	66 kDa	0		3	2
LP03102p OS=Drosophila melanogaster OX=7227 GN=Dmel\CG3356 PE=1 SV=1	Q9W196	Dmel	129 kDa	0		3	2
BcDNA.GH12326 OS=Drosophila melanogaster OX=7227 GN=clone 2.12 PE=1 SV=1	Q9V3S7	clone	48 kDa	0		3	2
CG13350 (Fragment) OS=Drosophila melanogaster OX=7227 GN=Ctf4 PE=4 SV=1	Q2XY08 (+2)	Ctf4	95 kDa	0		3	2
FI02069p (Fragment) OS=Drosophila melanogaster OX=7227 PE=2 SV=1	B5RIG9 (+1)		55 kDa	0		3	2
RE19272p OS=Drosophila melanogaster OX=7227 GN=Aats-gly-RB PE=2 SV=1	C9QP25 (+2)	Aats-gly-RB	85 kDa	0		3	2
Protein kintoun OS=Drosophila melanogaster OX=7227 GN=Nop17l PE=1 SV=1	Q0E9G3	Nop17l	95 kDa	0		0
GEO13371p1 (Fragment) OS=Drosophila melanogaster OX=7227 PE=2 SV=1	A0A1B2AK30 (+1)		16 kDa	0		3	2
Lap1, isoform B OS=Drosophila melanogaster OX=7227 GN=Lap1 PE=4 SV=1	A0A0B4JCT8 (+1)	Lap1	96 kDa	0		0
LD24721p OS=Drosophila melanogaster OX=7227 GN=Sgt PE=1 SV=1	Q9VJD4	Sgt	36 kDa	0		3	2
RE62467p (Fragment) OS=Drosophila melanogaster OX=7227 GN=cdc23-RA PE=2 SV=1	B8A417 (+1)	cdc23-RA	79 kDa	0		3	2
Activated Cdc42 kinase-like OS=Drosophila melanogaster OX=7227 GN=Ack-like PE=1 SV=3	Q9I7F7	Ack-like	147 kDa	3	1	0
LqfR-L OS=Drosophila melanogaster OX=7227 GN=LqfR PE=2 SV=1	I6QP77 (+3)	LqfR	68 kDa	0		3	1
Gigas, isoform B OS=Drosophila melanogaster OX=7227 GN=gig PE=1 SV=1	M9PD17 (+3)	gig	204 kDa	0		3	1
Ataxin-2 homolog OS=Drosophila melanogaster OX=7227 GN=Atx2 PE=1 SV=1	Q8SWR8	Atx2	118 kDa	0		3	1
LD32873p OS=Drosophila melanogaster OX=7227 GN=mahe PE=1 SV=1	Q9W3M7	mahe	100 kDa	0		3	1
CR6-interacting factor OS=Drosophila melanogaster OX=7227 GN=CRIF PE=1 SV=1	Q9VP13	CRIF	27 kDa	0		3	1
IP17216p (Fragment) OS=Drosophila melanogaster OX=7227 GN=RpL23a PE=2 SV=1	|#DECOY#A1A6X4|A1A6X4_DROME-DECOY		?	0		3	1
GH26270p OS=Drosophila melanogaster OX=7227 GN=Idh3b PE=1 SV=1	|#DECOY#Q9VD58|Q9VD58_DROME-DECOY		?	0		3	1
IP14839p OS=Drosophila melanogaster OX=7227 GN=Pdhb PE=1 SV=1	Q8IML6	Pdhb	31 kDa	0		3	1
RE23622p (Fragment) OS=Drosophila melanogaster OX=7227 GN=Moca-cyp PE=2 SV=1	Q8IGV4 (+3)	Moca-cyp	116 kDa	3	1	0
LD15481p OS=Drosophila melanogaster OX=7227 GN=Rs1 PE=1 SV=1	Q7JQN4 (+1)	Rs1	88 kDa	1	1	0
Dihydrolipoamide acetyltransferase component of pyruvate dehydrogenase complex OS=Drosophila melanogaster OX=7227 GN=muc PE=1 SV=1	M9PCA2 (+2)	muc	50 kDa	0		1	1
Glycoprotein 210 kDa, isoform A OS=Drosophila melanogaster OX=7227 GN=Gp210 PE=1 SV=1	A1Z6H7 (+2)	Gp210	210 kDa	1	1	0
T-complex protein 1 subunit epsilon OS=Drosophila melanogaster OX=7227 GN=CCT5 PE=1 SV=1	Q7KKI0	CCT5	59 kDa	0		1	1
Inositol-3-phosphate synthase OS=Drosophila melanogaster OX=7227 GN=Inos PE=1 SV=1	O97477	Inos	62 kDa	1	1	1	1
Dynein light intermediate chain, isoform A OS=Drosophila melanogaster OX=7227 GN=Dlic PE=1 SV=2	Q9VZ20	Dlic	54 kDa	1	1	1	1
Uncharacterized protein, isoform H OS=Drosophila melanogaster OX=7227 GN=Dmel\CG7546 PE=1 SV=1	M9PEE7	Dmel	142 kDa	0		1	1
Nopp140-like nucleolar protein OS=Drosophila melanogaster OX=7227 GN=Nopp140 PE=2 SV=1	Q7Z2C9	Nopp140	72 kDa	0		1	1
FI17838p1 OS=Drosophila melanogaster OX=7227 GN=ebi-RA PE=2 SV=1	|#DECOY#H1UUI8|H1UUI8_DROME-DECOY		?	0		1	1
Catsup protein OS=Drosophila melanogaster OX=7227 GN=Catsup PE=4 SV=1	B9UYC1 (+1)	Catsup	49 kDa	0	0	2	1
Kinesin-like protein (Fragment) OS=Drosophila melanogaster OX=7227 GN=ncd PE=3 SV=1	|#DECOY#B6UXF4|B6UXF4_DROME-DECOY		?	0		1	1
Uncharacterized protein, isoform A OS=Drosophila melanogaster OX=7227 GN=Apl PE=4 SV=2	|#DECOY#Q9I7R5|Q9I7R5_DROME-DECOY		?	0		2	1
LD24616p OS=Drosophila melanogaster OX=7227 GN=cno PE=2 SV=1	Q95TT5 (+1)	cno	227 kDa	0	0	0
Piwi OS=Drosophila melanogaster OX=7227 GN=piwi PE=3 SV=1	A0A075BJ92 (+4)	piwi	97 kDa	0		2	2
Gustavus, isoform G OS=Drosophila melanogaster OX=7227 GN=gus PE=4 SV=1	A0A0B4K6X3 (+1)	gus	32 kDa	0		2	2
COP9 signalosome subunit 5, isoform B OS=Drosophila melanogaster OX=7227 GN=CSN5 PE=4 SV=1	A0A0B4KHM2 (+1)	CSN5	37 kDa	0		2	2
GEO01114p1 (Fragment) OS=Drosophila melanogaster OX=7227 PE=2 SV=1	A0A1B2AJY5 (+2)		15 kDa	0		2	2
Uncharacterized protein, isoform A OS=Drosophila melanogaster OX=7227 GN=Dmel\CG12159 PE=1 SV=1	A1Z765 (+2)	Dmel	22 kDa	0		2	2
GEO08456p1 OS=Drosophila melanogaster OX=7227 GN=Dmel\CG30373 PE=2 SV=1	A1Z7B8 (+1)	Dmel	18 kDa	0		2	2
SD19268p OS=Drosophila melanogaster OX=7227 GN=Dmel\CG8778 PE=1 SV=1	A1Z934	Dmel	32 kDa	0		2	2
TA01510p (Fragment) OS=Drosophila melanogaster OX=7227 GN=Cp18-RA PE=2 SV=1	C0PVD4 (+1)	Cp18-RA	19 kDa	0		2	2
RE03648p1 OS=Drosophila melanogaster OX=7227 GN=wisp PE=2 SV=1	L7XBB9 (+1)	wisp	151 kDa	0		2	2
U2 small nuclear riboprotein auxiliary factor 38, isoform B OS=Drosophila melanogaster OX=7227 GN=U2af38 PE=4 SV=1	M9PBM1 (+1)	U2af38	30 kDa	0		2	2
GEO05625p1 OS=Drosophila melanogaster OX=7227 GN=Dmel\CG9705 PE=2 SV=1	M9PFS8 (+1)	Dmel	16 kDa	0		2	2
Egalitarian OS=Drosophila melanogaster OX=7227 GN=egl PE=2 SV=2	P92030 (+2)	egl	111 kDa	0		2	2
Sterol carrier protein x OS=Drosophila melanogaster OX=7227 GN=ScpX PE=2 SV=1	Q24506 (+3)	ScpX	59 kDa	0		2	2
HDC05827 OS=Drosophila melanogaster OX=7227 GN=Dmel\CG34228 PE=1 SV=1	Q6IGN6	Dmel	10 kDa	0		2	2
Inner nuclear membrane protein Man1 OS=Drosophila melanogaster OX=7227 GN=MAN1 PE=1 SV=1	Q7JRE4	MAN1	74 kDa	0		2	2
CDK7/cyclin H assembly factor MAT1 OS=Drosophila melanogaster OX=7227 GN=Mat1 PE=1 SV=1	Q7KPG8 (+1)	Mat1	37 kDa	0		2	2
1-acyl-sn-glycerol-3-phosphate acyltransferase OS=Drosophila melanogaster OX=7227 GN=Agpat2 PE=2 SV=1	Q7KTI0 (+1)	Agpat2	31 kDa	0		2	2
Peroxiredoxin OS=Drosophila melanogaster OX=7227 GN=Prx5 PE=1 SV=1	Q960M4	Prx5	20 kDa	0		2	2
Probable cleavage and polyadenylation specificity factor subunit 2 OS=Drosophila melanogaster OX=7227 GN=Cpsf100 PE=1 SV=1	Q9V3D6	Cpsf100	85 kDa	0		2	2
Anamorsin homolog OS=Drosophila melanogaster OX=7227 GN=CIAPIN1 PE=2 SV=1	Q9V3Y2	CIAPIN1	27 kDa	0		2	2
Transcription elongation factor SPT5 OS=Drosophila melanogaster OX=7227 GN=Spt5 PE=1 SV=1	Q9V460	Spt5	119 kDa	0		2	2
Condensin complex subunit 1 OS=Drosophila melanogaster OX=7227 GN=Cap-D2 PE=1 SV=1	Q9VAJ1	Cap-D2	158 kDa	0		2	2
Interleukin enhancer-binding factor 2 homolog OS=Drosophila melanogaster OX=7227 GN=CG5641 PE=2 SV=1	Q9VG73	CG5641	44 kDa	0		2	2
Elongation factor Ts, mitochondrial OS=Drosophila melanogaster OX=7227 GN=mEFTs PE=2 SV=1	Q9VJC7	mEFTs	35 kDa	0		2	2
Gamma-tubulin complex component 4 homolog OS=Drosophila melanogaster OX=7227 GN=Grip75 PE=1 SV=2	Q9VKU7 (+1)	Grip75	75 kDa	0		2	2
LP08774p OS=Drosophila melanogaster OX=7227 GN=Usp14 PE=1 SV=1	Q9VKZ8	Usp14	54 kDa	0		2	2
Adenylyl cyclase-associated protein OS=Drosophila melanogaster OX=7227 GN=capt PE=1 SV=2	Q9VPX7	capt	46 kDa	0		2	2
UPF0389 protein CG9231 OS=Drosophila melanogaster OX=7227 GN=CG9231 PE=1 SV=1	Q9VW12 (+1)	CG9231	14 kDa	0		2	2
Anaphase-promoting complex subunit 2 OS=Drosophila melanogaster OX=7227 GN=mr PE=1 SV=1	Q9W1E5	mr	92 kDa	0		2	2
L.2.35Df OS=Drosophila melanogaster OX=7227 GN=Mtr4 PE=1 SV=1	Q9Y134	Mtr4	119 kDa	0		2	2
Hippo, isoform B OS=Drosophila melanogaster OX=7227 GN=hpo PE=4 SV=1	A0A0B4KFW0 (+1)	hpo	75 kDa	0		2	2
AT22044p1 OS=Drosophila melanogaster OX=7227 GN=Orc3 PE=1 SV=1	Q7K2L1 (+1)	Orc3	82 kDa	0		2	2
RH59310p OS=Drosophila melanogaster OX=7227 GN=spidey PE=1 SV=1	Q9W3N1	spidey	35 kDa	0		2	2
Cabeza, isoform D OS=Drosophila melanogaster OX=7227 GN=caz PE=4 SV=1	M9PH94 (+1)	caz	34 kDa	0		2	2
BcDNA.LD02793 OS=Drosophila melanogaster OX=7227 GN=Prp19 PE=1 SV=1	Q7KLW9	Prp19	55 kDa	0		2	2
Aluminum tubes, isoform G OS=Drosophila melanogaster OX=7227 GN=alt PE=1 SV=1	Q960Y8 (+1)	alt	99 kDa	0		2	2
DREF transcription factor OS=Drosophila melanogaster OX=7227 GN=Dref PE=4 SV=1	O96083 (+2)	Dref	81 kDa	0		2	2
Plexus, isoform E OS=Drosophila melanogaster OX=7227 GN=px PE=4 SV=1	A0A0B4KGB8 (+1)	px	206 kDa	0		2	2
COP9 signalosome complex subunit 1b OS=Drosophila melanogaster OX=7227 GN=CSN1b PE=2 SV=1	Q9VVU5	CSN1b	58 kDa	0		2	2
LD35640p OS=Drosophila melanogaster OX=7227 GN=Psi PE=1 SV=1	A1ZAK7 (+12)	Psi	82 kDa	0		2	2
BcDNA.LD08534 OS=Drosophila melanogaster OX=7227 GN=dUTPase PE=1 SV=1	Q9V3I1	dUTPase	20 kDa	0		2	2
Rapsynoid OS=Drosophila melanogaster OX=7227 GN=pins PE=2 SV=1	Q9NFR7	pins	71 kDa	0		2	2
Oxysterol-binding protein OS=Drosophila melanogaster OX=7227 GN=Dmel\CG1513 PE=1 SV=2	A1Z814 (+1)	Dmel	87 kDa	0		2	2
Rabconnectin-3A OS=Drosophila melanogaster OX=7227 GN=Rbcn-3A PE=1 SV=3	Q9W425	Rbcn-3A	377 kDa	0		2	2
Ensconsin, isoform F OS=Drosophila melanogaster OX=7227 GN=ens PE=1 SV=1	A8JNK1 (+10)	ens	136 kDa	0		2	2
Peptidylprolyl isomerase OS=Drosophila melanogaster OX=7227 GN=FK506-bp2-RA PE=2 SV=1	H0RN81 (+1)	FK506-bp2-RA	12 kDa	0		2	2
60S ribosomal protein L29 (Fragment) OS=Drosophila melanogaster OX=7227 PE=2 SV=1	A0A1B2AJK8 (+2)		9 kDa	0		2	2
Peroxisomal membrane protein 70 kDa, isoform C OS=Drosophila melanogaster OX=7227 GN=Pmp70 PE=1 SV=1	M9PF96 (+1)	Pmp70	73 kDa	0		2	2
FI01416p OS=Drosophila melanogaster OX=7227 GN=SK[[66]] PE=1 SV=1	Q0E8X8	SK	12 kDa	0		2	2
Lipid storage droplet-2, isoform D OS=Drosophila melanogaster OX=7227 GN=Lsd-2 PE=1 SV=2	Q0KHS6 (+3)	Lsd-2	36 kDa	0		2	2
Importin beta11 OS=Drosophila melanogaster OX=7227 GN=Impbeta11 PE=2 SV=1	Q7K0Q2	Impbeta11	122 kDa	0		2	2
LD35157p OS=Drosophila melanogaster OX=7227 GN=CG13638 PE=1 SV=1	Q8MSB1	CG13638	45 kDa	0		2	2
Carnitine palmitoyltransferase 2 OS=Drosophila melanogaster OX=7227 GN=CPT2 PE=1 SV=1	Q9VZW7	CPT2	75 kDa	0		2	2
GH10162p OS=Drosophila melanogaster OX=7227 GN=Dmel\CG3295 PE=1 SV=1	Q9W2N5	Dmel	49 kDa	0		2	2
RE13149p OS=Drosophila melanogaster OX=7227 GN=Tfb4 PE=2 SV=1	Q8SZ89 (+1)	Tfb4	33 kDa	0		2	2
Mitogen-activated protein kinase (Fragment) OS=Drosophila melanogaster OX=7227 GN=rl-RB PE=2 SV=1	D9PTS4 (+2)	rl-RB	47 kDa	0		2	2
C11.1 (Fragment) OS=Drosophila melanogaster OX=7227 GN=c11.1 PE=4 SV=1	Q9NHY0 (+1)	c11	157 kDa	0		2	2
Surfeit locus protein 4 homolog OS=Drosophila melanogaster OX=7227 GN=Surf4 PE=2 SV=1	O18405	Surf4	31 kDa	0		2	2
tRNA-splicing ligase RtcB homolog OS=Drosophila melanogaster OX=7227 GN=RtcB PE=2 SV=1	Q9VIW7	RtcB	56 kDa	0		2	2
Non-specific lethal 1, isoform N OS=Drosophila melanogaster OX=7227 GN=nsl1 PE=1 SV=1	A0A0B4K663 (+7)	nsl1	170 kDa	0		2	2
Mothers against decapentaplegic homolog OS=Drosophila melanogaster OX=7227 GN=Mad PE=3 SV=1	M9PBX0 (+1)	Mad	58 kDa	0		2	2
Drop out, isoform A OS=Drosophila melanogaster OX=7227 GN=dop PE=1 SV=1	Q9VUQ9	dop	226 kDa	0		2	2
SD19562p OS=Drosophila melanogaster OX=7227 GN=mRpL3 PE=2 SV=1	Q8MRV7 (+1)	mRpL3	41 kDa	0		2	2
Protein MON2 homolog OS=Drosophila melanogaster OX=7227 GN=mon2 PE=2 SV=4	Q9VLT1 (+1)	mon2	187 kDa	0		2	2
Multiple ankyrin repeats single KH domain, isoform C OS=Drosophila melanogaster OX=7227 GN=mask PE=4 SV=1	A0A0B4K725 (+3)	mask	424 kDa	0		2	2
SWI/SNF-related matrix-associated actin-dependent regulator of chromatin subfamily A containing DEAD/H box 1 homolog OS=Drosophila melanogaster OX=7227 GN=Etl1 PE=1 SV=1	Q9VL72	Etl1	95 kDa	0		2	2
CCR4-NOT transcription complex subunit 3, isoform A OS=Drosophila melanogaster OX=7227 GN=Not3 PE=1 SV=1	Q7K126	Not3	92 kDa	0		2	2
Raf homolog serine/threonine-protein kinase Raf OS=Drosophila melanogaster OX=7227 GN=Raf PE=1 SV=6	P11346	Raf	84 kDa	0		2	2
Uncharacterized protein, isoform B OS=Drosophila melanogaster OX=7227 GN=p23 PE=1 SV=1	A0A0B4K6D2 (+2)	p23	21 kDa	0		2	2
LD37169p OS=Drosophila melanogaster OX=7227 GN=Dmel21.3 PE=1 SV=1	Q9VWG1	Dmel21	21 kDa	0		2	2
Chromosome alignment defect 1 OS=Drosophila melanogaster OX=7227 GN=cal1 PE=4 SV=1	Q9VEN2	cal1	110 kDa	0		2	2
RE23733p OS=Drosophila melanogaster OX=7227 GN=CG6718 PE=2 SV=1	Q29R25 (+2)	CG6718	98 kDa	0		2	2
Probable lysine-specific histone demethylase 1 OS=Drosophila melanogaster OX=7227 GN=Su(var)3-3 PE=1 SV=1	B7Z0G7 (+2)	Su	98 kDa	0		2	2
GM03574p OS=Drosophila melanogaster OX=7227 GN=Mulk PE=2 SV=1	Q95SC2 (+1)	Mulk	31 kDa	0		2	2
Heterogeneous nuclear ribonucleoprotein at 98DE, isoform C OS=Drosophila melanogaster OX=7227 GN=Hrb98DE PE=1 SV=1	A4V3J5 (+5)	Hrb98DE	39 kDa	0		2	2
FI18812p1 OS=Drosophila melanogaster OX=7227 GN=Unr PE=1 SV=1	B7Z0E2 (+4)	Unr	118 kDa	0		2	2
LD19812p OS=Drosophila melanogaster OX=7227 GN=vnc PE=1 SV=1	Q9VT75	vnc	22 kDa	0		2	2
UDP-glucose:glycoprotein glucosyltransferase OS=Drosophila melanogaster OX=7227 GN=Ugt PE=1 SV=2	Q09332	Ugt	174 kDa	0		2	2
Osa, isoform F OS=Drosophila melanogaster OX=7227 GN=osa PE=1 SV=1	A0A0B4KGD1 (+5)	osa	269 kDa	0		2	2
Glucose-6-phosphate isomerase OS=Drosophila melanogaster OX=7227 GN=Pgi PE=2 SV=2	P52029	Pgi	62 kDa	0		2	2
E3 ubiquitin-protein ligase listerin OS=Drosophila melanogaster OX=7227 GN=Ltn1 PE=1 SV=2	Q9VW09	Ltn1	199 kDa	0		2	2
RE63495p OS=Drosophila melanogaster OX=7227 GN=CG13366-RB PE=2 SV=1	C7LA68 (+6)	CG13366-RB	122 kDa	0		2	2
Methionine aminopeptidase 2 OS=Drosophila melanogaster OX=7227 GN=und PE=1 SV=1	Q9VL89	und	50 kDa	0		2	2
Protein transport protein Sec61 subunit beta OS=Drosophila melanogaster OX=7227 GN=Sec61beta PE=1 SV=1	Q7JZN0	Sec61beta	10 kDa	0		2	2
GH06271p OS=Drosophila melanogaster OX=7227 GN=Mms19 PE=1 SV=1	Q95U54 (+1)	Mms19	107 kDa	0		2	2
6-phosphogluconate dehydrogenase, decarboxylating OS=Drosophila melanogaster OX=7227 GN=Pgd PE=3 SV=1	A0A0F6T1J9 (+2)	Pgd	52 kDa	0		2	2
RH28463p (Fragment) OS=Drosophila melanogaster OX=7227 GN=Xpd-RA PE=2 SV=1	D3DMG9 (+3)	Xpd-RA	89 kDa	0		2	2
IP17240p OS=Drosophila melanogaster OX=7227 GN=SNF4Agamma PE=2 SV=1	A1A6Y3 (+4)	SNF4Agamma	68 kDa	0		2	2
GH07148p OS=Drosophila melanogaster OX=7227 GN=Dmel\CG1582 PE=1 SV=2	Q9VZ55	Dmel	146 kDa	0		2	2
Phenylalanine--tRNA ligase alpha subunit OS=Drosophila melanogaster OX=7227 GN=alpha-PheRS PE=1 SV=1	Q9W3J5	alpha-PheRS	56 kDa	0		2	2
Nuclear pore complex protein Nup214 OS=Drosophila melanogaster OX=7227 GN=Nup214 PE=1 SV=2	Q9W1X4	Nup214	175 kDa	0		2	2
IP20241p OS=Drosophila melanogaster OX=7227 GN=Nost PE=1 SV=1	B5RJS0 (+5)	Nost	139 kDa	0		2	2
Sorting nexin 6, isoform B OS=Drosophila melanogaster OX=7227 GN=Snx6 PE=1 SV=1	M9NDI3 (+1)	Snx6	51 kDa	0		2	2
Ectopic P-granules autophagy protein 5, isoform D OS=Drosophila melanogaster OX=7227 GN=Epg5 PE=1 SV=1	A0A0B4K6N7 (+1)	Epg5	281 kDa	0		2	2
Enhancer of bithorax, isoform E OS=Drosophila melanogaster OX=7227 GN=E(bx) PE=1 SV=1	E1JHV6 (+5)	E	301 kDa	0		2	2
GM14349p OS=Drosophila melanogaster OX=7227 GN=Dmel\CG7920 PE=1 SV=1	Q9VAC1	Dmel	52 kDa	0		2	2
SD12036p (Fragment) OS=Drosophila melanogaster OX=7227 GN=fabp PE=2 SV=1	Q8IGA2 (+3)	fabp	16 kDa	0		2	2
ER membrane protein complex 1, isoform C OS=Drosophila melanogaster OX=7227 GN=EMC1 PE=1 SV=1	A0A0B4LGV1 (+1)	EMC1	100 kDa	0		2	2
LD46175p OS=Drosophila melanogaster OX=7227 GN=sea PE=1 SV=1	Q7KSQ0	sea	34 kDa	0		2	2
DNA topoisomerase 3-beta OS=Drosophila melanogaster OX=7227 GN=Top3beta PE=2 SV=2	O96651 (+1)	Top3beta	97 kDa	0		2	2
Reduction of Rh1, isoform A OS=Drosophila melanogaster OX=7227 GN=roh PE=1 SV=1	Q0E8X7	roh	10 kDa	0		2	2
Nuclear pore complex protein Nup160 homolog OS=Drosophila melanogaster OX=7227 GN=Nup160 PE=1 SV=1	Q9VKJ3 (+1)	Nup160	160 kDa	0		2	2
Cyclin-dependent kinase 2, isoform C OS=Drosophila melanogaster OX=7227 GN=Cdk2 PE=1 SV=1	E1JIR3 (+1)	Cdk2	36 kDa	0		2	2
DNA-directed RNA polymerase I subunit RPA1 OS=Drosophila melanogaster OX=7227 GN=RpI1 PE=1 SV=2	P91875	RpI1	185 kDa	0		2	2
Regulator of nonsense transcripts 1 homolog OS=Drosophila melanogaster OX=7227 GN=Upf1 PE=1 SV=2	Q9VYS3 (+1)	Upf1	130 kDa	0		2	2
CG9201 (Fragment) OS=Drosophila melanogaster OX=7227 GN=CG9201 PE=4 SV=1	A9YHR2 (+3)	CG9201	27 kDa	0		2	2
Atlastin, isoform C OS=Drosophila melanogaster OX=7227 GN=atl PE=4 SV=1	A0A0B4LHV8	atl	61 kDa	0		2	2
CENP-ana, isoform B OS=Drosophila melanogaster OX=7227 GN=cana PE=4 SV=1	X2J5P0	cana	163 kDa	0		2	2
Vacuolar protein sorting-associated protein 16 homolog OS=Drosophila melanogaster OX=7227 GN=mar PE=3 SV=1	A0A2Z1YTP5 (+1)	mar	96 kDa	0		2	2
RE54322p OS=Drosophila melanogaster OX=7227 GN=vimar PE=1 SV=1	A1Z6S6 (+3)	vimar	70 kDa	0		2	2
Uncharacterized protein, isoform B OS=Drosophila melanogaster OX=7227 GN=Dmel\CG13373 PE=4 SV=1	A8JUS8	Dmel	20 kDa	0		2	2
Cytochrome c oxidase assembly factor 3, mitochondrial OS=Drosophila melanogaster OX=7227 GN=Ccdc56 PE=3 SV=1	P0DKM0	Ccdc56	10 kDa	0		2	2
ATPase ASNA1 homolog OS=Drosophila melanogaster OX=7227 GN=CG1598 PE=2 SV=1	Q7JWD3 (+1)	CG1598	38 kDa	0		2	2
RE62833p OS=Drosophila melanogaster OX=7227 GN=Dmel\CG6638 PE=1 SV=1	Q9VSL9	Dmel	46 kDa	0		2	2
GH21273p OS=Drosophila melanogaster OX=7227 GN=Dmel\CG11999 PE=1 SV=1	Q9VNA3	Dmel	24 kDa	0		2	2
Histone-lysine N-methyltransferase trithorax OS=Drosophila melanogaster OX=7227 GN=trx PE=1 SV=4	P20659	trx	400 kDa	0		0
Shattered OS=Drosophila melanogaster OX=7227 GN=shtd PE=1 SV=1	Q9VXV3	shtd	227 kDa	0		2	2
Anastral spindle 2, isoform B OS=Drosophila melanogaster OX=7227 GN=ana2 PE=1 SV=1	A0A0B4LFU9 (+1)	ana2	46 kDa	0		2	2
IP07454p OS=Drosophila melanogaster OX=7227 GN=Dmel\CG4627 PE=2 SV=1	Q059A4	Dmel	23 kDa	0		2	2
GEO07746p1 OS=Drosophila melanogaster OX=7227 GN=Pfdn1 PE=1 SV=2	Q9VMH8	Pfdn1	15 kDa	0		2	2
Protein-L-isoaspartate O-methyltransferase OS=Drosophila melanogaster OX=7227 GN=Pcmt PE=1 SV=1	A0A0B4KGK0 (+1)	Pcmt	22 kDa	0		0
Protein argonaute-3 OS=Drosophila melanogaster OX=7227 GN=AGO3 PE=1 SV=3	Q7PLK0	AGO3	99 kDa	0		2	2
Dystrobrevin OS=Drosophila melanogaster OX=7227 GN=Dyb PE=3 SV=1	A0A0B4K6Z2 (+3)	Dyb	82 kDa	0		2	1
Splicing factor 1, isoform B OS=Drosophila melanogaster OX=7227 GN=SF1 PE=1 SV=1	A0A0B4KG60 (+4)	SF1	40 kDa	0		2	1
Barentsz, isoform D OS=Drosophila melanogaster OX=7227 GN=btz PE=1 SV=1	A0A0B4KH64 (+1)	btz	89 kDa	0		2	1
Gcn2, isoform C OS=Drosophila melanogaster OX=7227 GN=Gcn2 PE=1 SV=1	A0A0B4KHX7 (+4)	Gcn2	179 kDa	0		2	1
PAN2-PAN3 deadenylation complex catalytic subunit PAN2 OS=Drosophila melanogaster OX=7227 GN=PAN2 PE=3 SV=1	A0A0B4LEY4 (+2)	PAN2	139 kDa	0		2	1
Eukaryotic translation initiation factor 3 subunit J OS=Drosophila melanogaster OX=7227 GN=eIF3j PE=3 SV=1	A0A0B4LF26 (+1)	eIF3j	27 kDa	0		2	1
Small nuclear ribonucleoprotein E (Fragment) OS=Drosophila melanogaster OX=7227 PE=2 SV=1	A0A1B2AJY7 (+1)		11 kDa	0		2	1
Elongation factor Tu OS=Drosophila melanogaster OX=7227 GN=mEFTu1 PE=1 SV=1	A1Z9E3 (+2)	mEFTu1	54 kDa	0		2	1
Uncharacterized protein, isoform B OS=Drosophila melanogaster OX=7227 GN=Dmel\CG6701 PE=1 SV=2	A1Z9K0 (+2)	Dmel	151 kDa	0		2	1
Phosphoinositide-dependent kinase 1, isoform F OS=Drosophila melanogaster OX=7227 GN=Pdk1 PE=4 SV=1	A4V164 (+6)	Pdk1	86 kDa	0		2	1
FI07257p (Fragment) OS=Drosophila melanogaster OX=7227 GN=mRpL2-RA PE=2 SV=1	B5RJ52 (+2)	mRpL2-RA	36 kDa	0		2	1
Transcription elongation factor spt6 OS=Drosophila melanogaster OX=7227 GN=Spt6-RA PE=2 SV=1	B6IDH0 (+2)	Spt6-RA	209 kDa	0		2	1
RT04026p OS=Drosophila melanogaster OX=7227 GN=Cp36-RA PE=2 SV=1	D1Z363 (+1)	Cp36-RA	30 kDa	0		2	1
Reticulon-like protein OS=Drosophila melanogaster OX=7227 GN=Rtnl1 PE=1 SV=2	E1JHT9 (+5)	Rtnl1	25 kDa	0		2	1
F-actin-capping protein subunit beta OS=Drosophila melanogaster OX=7227 GN=cpb PE=3 SV=1	M9PBN7 (+1)	cpb	31 kDa	0		2	1
Uncharacterized protein, isoform F OS=Drosophila melanogaster OX=7227 GN=Dmel\CG6767 PE=1 SV=1	M9PEP5 (+6)	Dmel	40 kDa	0		2	1
Nipsnap, isoform F OS=Drosophila melanogaster OX=7227 GN=Nipsnap PE=4 SV=2	M9PJP0 (+1)	Nipsnap	32 kDa	0		2	1
Karyopherin alpha 3 (Fragment) OS=Drosophila melanogaster OX=7227 GN=Kap-alpha3 PE=2 SV=1	O76522 (+2)	Kap-alpha3	57 kDa	0		2	1
EG:17E2.1 protein OS=Drosophila melanogaster OX=7227 GN=EG:17E2.1 PE=4 SV=1	O76886 (+1)	EG	19 kDa	0		2	1
Longitudinals lacking protein, isoform G OS=Drosophila melanogaster OX=7227 GN=lola PE=1 SV=2	P42283 (+5)	lola	96 kDa	0		2	1
Ras-like GTP-binding protein Rho1 OS=Drosophila melanogaster OX=7227 GN=Rho1 PE=1 SV=1	P48148	Rho1	22 kDa	0		2	1
Small nuclear ribonucleoprotein-associated protein B OS=Drosophila melanogaster OX=7227 GN=SmB PE=1 SV=1	Q05856	SmB	21 kDa	0		2	1
Polyadenylate-binding protein OS=Drosophila melanogaster OX=7227 GN=Rox8 PE=2 SV=1	Q08212 (+3)	Rox8	50 kDa	0		2	1
Small nuclear ribonucleoprotein F OS=Drosophila melanogaster OX=7227 GN=SmF PE=1 SV=2	Q24297	SmF	10 kDa	0		2	1
Peptidyl-prolyl cis-trans isomerase OS=Drosophila melanogaster OX=7227 GN=Dmel\CG17266 PE=1 SV=1	Q4V5H1	Dmel	20 kDa	0		2	1
Aspartyl-tRNA synthetase, isoform A OS=Drosophila melanogaster OX=7227 GN=AspRS PE=1 SV=1	Q7K0E6	AspRS	59 kDa	0		2	1
Probable cytosolic iron-sulfur protein assembly protein Ciao1 OS=Drosophila melanogaster OX=7227 GN=Ciao1 PE=1 SV=1	Q7K1Y4	Ciao1	37 kDa	0		2	1
Uncharacterized protein, isoform B OS=Drosophila melanogaster OX=7227 GN=anon-WO0118547.327 PE=1 SV=1	Q8INP8 (+3)	anon-WO0118547	41 kDa	0		2	1
THO complex protein 7 OS=Drosophila melanogaster OX=7227 GN=thoc7 PE=1 SV=2	Q8IRJ8	thoc7	33 kDa	0		2	1
LP02262p OS=Drosophila melanogaster OX=7227 GN=Fum1 PE=1 SV=1	Q8IRQ5 (+2)	Fum1	50 kDa	0		2	1
RE66761p OS=Drosophila melanogaster OX=7227 GN=Tom70 PE=2 SV=1	Q8MT29	Tom70	66 kDa	0		2	1
Glutaredoxin OS=Drosophila melanogaster OX=7227 GN=BcDNA:RH03087 PE=1 SV=1	Q8SXQ5	BcDNA	18 kDa	0		2	1
LD24793p OS=Drosophila melanogaster OX=7227 GN=Ref1 PE=1 SV=1	Q9V3E7	Ref1	28 kDa	0		2	1
GEO12235p1 OS=Drosophila melanogaster OX=7227 GN=Dmel\CG7950 PE=2 SV=3	Q9VAA6	Dmel	17 kDa	0		2	1
Nucleoporin Ndc1 OS=Drosophila melanogaster OX=7227 GN=Ndc1 PE=1 SV=1	Q9VCG4	Ndc1	65 kDa	0		2	1
LD47007p OS=Drosophila melanogaster OX=7227 GN=Dmel\CG11982 PE=1 SV=1	Q9VHI7	Dmel	40 kDa	0		2	1
Grip71 OS=Drosophila melanogaster OX=7227 GN=Grip71 PE=1 SV=2	Q9VJ57	Grip71	72 kDa	0		2	1
Putative ATP-dependent RNA helicase BoYb OS=Drosophila melanogaster OX=7227 GN=BoYb PE=2 SV=1	Q9VNP5	BoYb	121 kDa	0		2	1
DnaJ homolog shv OS=Drosophila melanogaster OX=7227 GN=shv PE=1 SV=1	Q9VPQ2	shv	40 kDa	0		2	1
Integrator complex subunit 14 OS=Drosophila melanogaster OX=7227 GN=IntS14 PE=1 SV=1	Q9VPY0	IntS14	65 kDa	0		2	1
Eukaryotic translation initiation factor 3 subunit K OS=Drosophila melanogaster OX=7227 GN=eIF3k PE=2 SV=1	Q9W2D9	eIF3k	26 kDa	0		2	1
RE16777p OS=Drosophila melanogaster OX=7227 GN=Glos PE=2 SV=2	Q9W4N9	Glos	105 kDa	0		2	1
Origin recognition complex subunit 6 OS=Drosophila melanogaster OX=7227 GN=Orc6 PE=1 SV=2	Q9Y1B2	Orc6	29 kDa	0		2	1
NEDD8 OS=Drosophila melanogaster OX=7227 GN=Nedd8 PE=1 SV=1	Q9VJ33 (+1)	Nedd8	9 kDa	0		2	1
Uncharacterized protein, isoform B OS=Drosophila melanogaster OX=7227 GN=Dmel\CG10880 PE=4 SV=1	M9PB07 (+1)	Dmel	32 kDa	0		2	1
Splicing factor 3B subunit 3 OS=Drosophila melanogaster OX=7227 GN=Sf3b3 PE=1 SV=2	Q9W0M7	Sf3b3	137 kDa	0		2	1
AT16346p OS=Drosophila melanogaster OX=7227 GN=6888 PE=2 SV=1	Q9VUM4	6888	22 kDa	0		2	1
Protein disks lost OS=Drosophila melanogaster OX=7227 GN=dlt PE=1 SV=2	Q8T626	dlt	139 kDa	0		2	1
Membrane-associated protein Hem OS=Drosophila melanogaster OX=7227 GN=Hem PE=2 SV=1	P55162	Hem	129 kDa	0		2	1
RE34215p OS=Drosophila melanogaster OX=7227 GN=Marf1 PE=2 SV=1	Q7KWH0 (+1)	Marf1	146 kDa	0		2	1
RH04336p OS=Drosophila melanogaster OX=7227 GN=CG9953 PE=2 SV=1	Q8SZM1 (+1)	CG9953	57 kDa	0		2	1
AP complex subunit beta OS=Drosophila melanogaster OX=7227 GN=AP-1-2beta PE=1 SV=1	Q24253 (+1)	AP-1-2beta	101 kDa	0		2	1
Syntaxin 1A, isoform B OS=Drosophila melanogaster OX=7227 GN=Syx1A PE=3 SV=1	A0A0B4JCZ4 (+2)	Syx1A	34 kDa	2	1	0
LD13130p (Fragment) OS=Drosophila melanogaster OX=7227 GN=CG7292-RB PE=2 SV=1	B3DN45 (+2)	CG7292-RB	107 kDa	2	1	0
RALBP1 associated Eps domain containing, isoform B OS=Drosophila melanogaster OX=7227 GN=Reps PE=1 SV=1	M9NDL7 (+1)	Reps	93 kDa	2	1	0
GH04826p OS=Drosophila melanogaster OX=7227 GN=CG12168 PE=2 SV=2	Q9VNC5	CG12168	37 kDa	2	1	0
UT01133p OS=Drosophila melanogaster OX=7227 GN=Dmel\CG13392 PE=1 SV=1	Q9VLM7	Dmel	25 kDa	0		2	1
LD43863p OS=Drosophila melanogaster OX=7227 GN=Dmel\CG4497 PE=1 SV=1	Q9VM36	Dmel	54 kDa	0		2	1
Toutatis, isoform F OS=Drosophila melanogaster OX=7227 GN=tou PE=1 SV=1	|#DECOY#A0A0B4KFE3|A0A0B4KFE3_DROME-DECOY		?	0		2	1
Uncharacterized protein OS=Drosophila melanogaster OX=7227 GN=CG14766 PE=4 SV=1	|#DECOY#A8DY64|A8DY64_DROME-DECOY		?	0		2	1
Arm repeat protein OS=Drosophila melanogaster OX=7227 GN=p120ctn PE=2 SV=1	Q9NHP1	p120ctn	87 kDa	0		2	1
LD05272p OS=Drosophila melanogaster OX=7227 GN=CG8020 PE=1 SV=2	Q9VWJ3	CG8020	24 kDa	2	1	0
IP12935p OS=Drosophila melanogaster OX=7227 PE=2 SV=1	Q29QU9 (+1)		71 kDa	1	1	0
SD04505p OS=Drosophila melanogaster OX=7227 GN=CG14971 PE=2 SV=1	Q960F0 (+1)	CG14971	52 kDa	2	1	0
IP21391p (Fragment) OS=Drosophila melanogaster OX=7227 GN=CG14353-RA PE=2 SV=1	B3DN15 (+2)	CG14353-RA	12 kDa	0		0
FI09630p (Fragment) OS=Drosophila melanogaster OX=7227 GN=CG3773-RA PE=2 SV=1	C0PTU7 (+2)	CG3773-RA	42 kDa	0		0
Cyclin-dependent kinase 9 OS=Drosophila melanogaster OX=7227 GN=Cdk9 PE=2 SV=1	O17432	Cdk9	47 kDa	0		2	1
Sallimus, isoform S OS=Drosophila melanogaster OX=7227 GN=sls PE=4 SV=1	|#DECOY#M9PBI9|M9PBI9_DROME-DECOY		?	0	0	1	1
Saposin-related, isoform B OS=Drosophila melanogaster OX=7227 GN=Sap-r PE=1 SV=2	Q8IMH4 (+1)	Sap-r	98 kDa	0	0	1	1
FI05611p OS=Drosophila melanogaster OX=7227 GN=knon PE=2 SV=1	A1ZAH1 (+1)	knon	82 kDa	0		1	1
LD07342p OS=Drosophila melanogaster OX=7227 GN=mip130 PE=1 SV=3	Q9W542	mip130	110 kDa	0		1	1
Lipin, isoform D OS=Drosophila melanogaster OX=7227 GN=Lpin PE=1 SV=1	A0A0B4JCQ5 (+9)	Lpin	121 kDa	0		1	1
Suppressor of variegation 2-10, isoform K OS=Drosophila melanogaster OX=7227 GN=Su(var)2-10 PE=1 SV=1	A0A0B4JCQ7 (+15)	Su	60 kDa	0		1	1
Uncharacterized protein, isoform C OS=Drosophila melanogaster OX=7227 GN=Dmel\CG17734 PE=1 SV=1	A0A0B4K6E6 (+4)	Dmel	12 kDa	0		1	1
Female lethal d, isoform C OS=Drosophila melanogaster OX=7227 GN=fl(2)d PE=4 SV=1	A0A0B4K713 (+1)	fl	45 kDa	0		1	1
Ced-6, isoform F OS=Drosophila melanogaster OX=7227 GN=ced-6 PE=1 SV=1	A0A0B4K730 (+3)	ced-6	56 kDa	0		1	1
Gartenzwerg, isoform C OS=Drosophila melanogaster OX=7227 GN=garz PE=1 SV=1	A0A0B4K7N0 (+2)	garz	195 kDa	0		1	1
Lysine (K)-specific demethylase 4A, isoform B OS=Drosophila melanogaster OX=7227 GN=Kdm4A PE=4 SV=1	A0A0B4K7U3 (+1)	Kdm4A	56 kDa	0		1	1
Aldehyde dehydrogenase OS=Drosophila melanogaster OX=7227 GN=Aldh-III PE=1 SV=1	A0A0B4KEE1 (+11)	Aldh-III	56 kDa	0		1	1
Like-AP180, isoform J OS=Drosophila melanogaster OX=7227 GN=lap PE=1 SV=1	A0A0B4KF90 (+5)	lap	72 kDa	0		1	1
Uncharacterized protein, isoform B OS=Drosophila melanogaster OX=7227 GN=Dmel\CG6693 PE=4 SV=1	A0A0B4KFR1 (+1)	Dmel	35 kDa	0		1	1
Sequence-specific single-stranded DNA-binding protein, isoform D OS=Drosophila melanogaster OX=7227 GN=Ssdp PE=1 SV=1	A0A0B4KGW6 (+3)	Ssdp	51 kDa	0		1	1
MORF-related gene 15, isoform B OS=Drosophila melanogaster OX=7227 GN=MRG15 PE=4 SV=1	A0A0B4KHJ7 (+1)	MRG15	48 kDa	0		1	1
Ferritin OS=Drosophila melanogaster OX=7227 GN=Fer1HCH PE=1 SV=1	A0A0B4KI27 (+5)	Fer1HCH	28 kDa	0		1	1
Methylthioribose-1-phosphate isomerase OS=Drosophila melanogaster OX=7227 GN=Dmel\CG11334 PE=3 SV=1	A0A0B4KI38 (+1)	Dmel	39 kDa	0		1	1
Spn-F, isoform B OS=Drosophila melanogaster OX=7227 GN=spn-F PE=4 SV=1	A0A0B4KI68 (+1)	spn-F	42 kDa	0		1	1
Inner centromere protein, isoform C OS=Drosophila melanogaster OX=7227 GN=Incenp PE=1 SV=1	A0A0B4LFQ2 (+1)	Incenp	83 kDa	0		1	1
Superoxide dismutase OS=Drosophila melanogaster OX=7227 GN=Sod2 PE=3 SV=1	A0A0B4LGQ1 (+1)	Sod2	25 kDa	0		1	1
GEO07782p1 (Fragment) OS=Drosophila melanogaster OX=7227 PE=2 SV=1	A0A1B2AJA9 (+1)		14 kDa	0		1	1
RE52822p OS=Drosophila melanogaster OX=7227 GN=vlc PE=1 SV=1	A1Z6H4 (+1)	vlc	64 kDa	0		1	1
Uncharacterized protein OS=Drosophila melanogaster OX=7227 GN=Dmel\CG1371 PE=1 SV=1	A1Z843 (+3)	Dmel	131 kDa	0		1	1
IP15743p (Fragment) OS=Drosophila melanogaster OX=7227 GN=BcDNA:LD22118 PE=2 SV=1	A2VEG0 (+1)	BcDNA	47 kDa	0		1	1
Loki, isoform C OS=Drosophila melanogaster OX=7227 GN=lok PE=3 SV=1	A4V0X0 (+1)	lok	52 kDa	0		1	1
Uncharacterized protein, isoform C OS=Drosophila melanogaster OX=7227 GN=CG2766 PE=4 SV=1	A4V3W8 (+1)	CG2766	45 kDa	0		1	1
Inosine-5'-monophosphate dehydrogenase OS=Drosophila melanogaster OX=7227 GN=ras PE=1 SV=1	A4V488 (+1)	ras	58 kDa	0		1	1
Peptidyl-prolyl cis-trans isomerase OS=Drosophila melanogaster OX=7227 GN=Cyp1 PE=2 SV=1	A8E774 (+1)	Cyp1	25 kDa	0		1	1
Vitelline membrane-like, isoform A OS=Drosophila melanogaster OX=7227 GN=Vml PE=4 SV=1	A8JUV4	Vml	56 kDa	0		1	1
RE24789p OS=Drosophila melanogaster OX=7227 GN=e(y)1 PE=2 SV=1	A8WHK8 (+1)	e	29 kDa	0		1	1
Nipped-B protein OS=Drosophila melanogaster OX=7227 PE=2 SV=1	A8WHK9 (+2)		234 kDa	0		1	1
FI09011p OS=Drosophila melanogaster OX=7227 GN=CG31759-RC PE=2 SV=1	B5RJE2 (+3)	CG31759-RC	69 kDa	0		1	1
SD27034p (Fragment) OS=Drosophila melanogaster OX=7227 GN=CG6613-RA PE=2 SV=1	B5X548 (+2)	CG6613-RA	82 kDa	0		1	1
Meiotic 9 (Fragment) OS=Drosophila melanogaster OX=7227 GN=mei-9 PE=4 SV=1	B6UWQ6 (+15)	mei-9	54 kDa	0		1	1
Spindle A (Fragment) OS=Drosophila melanogaster OX=7227 GN=spn-A PE=4 SV=1	B6UXY8 (+3)	spn-A	23 kDa	0		1	1
FI03269p (Fragment) OS=Drosophila melanogaster OX=7227 GN=CG6937-RA PE=2 SV=1	B7FNI7 (+1)	CG6937-RA	42 kDa	0		1	1
Mapmodulin, isoform B OS=Drosophila melanogaster OX=7227 GN=Mapmodulin PE=1 SV=1	B7YZR7 (+2)	Mapmodulin	29 kDa	0		1	1
SOSS complex subunit C homolog OS=Drosophila melanogaster OX=7227 GN=CG42374 PE=3 SV=1	B7Z073 (+1)	CG42374	14 kDa	0		1	1
Haywire, isoform B OS=Drosophila melanogaster OX=7227 GN=hay PE=4 SV=1	B7Z0G1 (+1)	hay	90 kDa	0		1	1
FI06802p (Fragment) OS=Drosophila melanogaster OX=7227 GN=CG31120-RB PE=2 SV=1	B8A3W8 (+3)	CG31120-RB	63 kDa	0		1	1
GM02335p OS=Drosophila melanogaster OX=7227 GN=ebi-RA PE=2 SV=1	C6SUT3 (+2)	ebi-RA	72 kDa	0		1	1
AT31544p (Fragment) OS=Drosophila melanogaster OX=7227 GN=CycH-RA PE=2 SV=1	C6SV35 (+3)	CycH-RA	38 kDa	0		1	1
Phosphatidylserine decarboxylase proenzyme, mitochondrial OS=Drosophila melanogaster OX=7227 GN=CG5991-RB PE=2 SV=1	C6TPB6 (+1)	CG5991-RB	50 kDa	0		1	1
RE09961p OS=Drosophila melanogaster OX=7227 GN=rdx-RA PE=2 SV=1	C7LAF6	rdx-RA	46 kDa	0		1	1
Hepatocyte growth factor-regulated tyrosine kinase substrate OS=Drosophila melanogaster OX=7227 GN=Hrs-RA PE=2 SV=1	C9QP23	Hrs-RA	72 kDa	0		1	1
RH33842p OS=Drosophila melanogaster OX=7227 GN=CG5798-RA PE=2 SV=1	D0IQK1 (+2)	CG5798-RA	103 kDa	0		1	1
GH16248p OS=Drosophila melanogaster OX=7227 GN=Pitslre PE=1 SV=1	D3PFF6 (+1)	Pitslre	89 kDa	0		1	1
Twenty-four, isoform F OS=Drosophila melanogaster OX=7227 GN=tyf PE=1 SV=2	E1JJD6 (+1)	tyf	174 kDa	0		1	1
Anaphase-promoting complex subunit 4 OS=Drosophila melanogaster OX=7227 GN=APC4 PE=1 SV=1	E1JJG4 (+2)	APC4	87 kDa	0		1	1
Uncharacterized protein, isoform B OS=Drosophila melanogaster OX=7227 GN=Dmel\CG10417 PE=1 SV=1	E2QC56 (+1)	Dmel	72 kDa	0		1	1
Pabp2, isoform B OS=Drosophila melanogaster OX=7227 GN=Pabp2 PE=1 SV=1	E2QC83 (+1)	Pabp2	25 kDa	0		1	1
Furry, isoform C OS=Drosophila melanogaster OX=7227 GN=fry PE=1 SV=1	E2QCY4 (+7)	fry	390 kDa	0		1	1
Jagunal, isoform B OS=Drosophila melanogaster OX=7227 GN=jagn PE=4 SV=1	E2QD00 (+1)	jagn	23 kDa	0		1	1
SD22850p OS=Drosophila melanogaster OX=7227 GN=cenB1A-RB PE=2 SV=1	E8NH23 (+3)	cenB1A-RB	67 kDa	0		1	1
RH36108p OS=Drosophila melanogaster OX=7227 GN=CG4452-RA PE=2 SV=1	F0JAN2 (+3)	CG4452-RA	26 kDa	0		1	1
FI19911p1 OS=Drosophila melanogaster OX=7227 GN=CG16935-RA PE=1 SV=1	H8F4T6 (+2)	CG16935-RA	39 kDa	0		1	1
CXXC finger protein 1, isoform B OS=Drosophila melanogaster OX=7227 GN=Cfp1 PE=4 SV=1	M9MS35 (+1)	Cfp1	74 kDa	0		1	1
Mitochondrial ribosomal protein S7, isoform B OS=Drosophila melanogaster OX=7227 GN=mRpS7 PE=4 SV=1	M9PCL5 (+1)	mRpS7	25 kDa	0		1	1
Maggie, isoform C OS=Drosophila melanogaster OX=7227 GN=mge PE=1 SV=1	M9PEJ1 (+1)	mge	6 kDa	0		1	1
NEDD8-activating enzyme E1 regulatory subunit OS=Drosophila melanogaster OX=7227 GN=APP-BP1 PE=3 SV=1	M9PEU5 (+1)	APP-BP1	59 kDa	0		1	1
5'-3' exoribonuclease OS=Drosophila melanogaster OX=7227 GN=Rat1 PE=1 SV=1	M9PEY6 (+2)	Rat1	104 kDa	0		1	1
Uncharacterized protein, isoform C OS=Drosophila melanogaster OX=7227 GN=Dmel\CG5989 PE=4 SV=1	M9PF10 (+1)	Dmel	49 kDa	0		1	1
Multiprotein bridging factor 1, isoform E OS=Drosophila melanogaster OX=7227 GN=mbf1 PE=1 SV=1	M9PFR6 (+1)	mbf1	20 kDa	0		1	1
RNA polymerase II elongation factor, isoform B OS=Drosophila melanogaster OX=7227 GN=TfIIS PE=4 SV=1	M9PFV9 (+1)	TfIIS	34 kDa	0		1	1
FI21160p1 OS=Drosophila melanogaster OX=7227 GN=su(sable) PE=2 SV=1	M9W963 (+2)	su	144 kDa	0		1	1
FI20803p1 OS=Drosophila melanogaster OX=7227 GN=CSN7-RA PE=2 SV=1	N0A733 (+1)	CSN7-RA	31 kDa	0		1	1
EG:25E8.4 protein OS=Drosophila melanogaster OX=7227 GN=Dmel\CG2865 PE=2 SV=2	O46070	Dmel	47 kDa	0		1	1
9 kD basic protein OS=Drosophila melanogaster OX=7227 GN=ATPsynE PE=1 SV=1	O77134	ATPsynE	9 kDa	0		1	1
EG:34F3.4 protein OS=Drosophila melanogaster OX=7227 GN=EG:34F3.4 PE=4 SV=1	O77435 (+1)	EG	117 kDa	0		1	1
Protein ref(2)P OS=Drosophila melanogaster OX=7227 GN=ref(2)P PE=1 SV=2	P14199	ref	65 kDa	0		1	1
Defective chorion-1 protein, FC177 isoform OS=Drosophila melanogaster OX=7227 GN=dec-1 PE=2 SV=2	P18171	2024-12-01	179 kDa	0		1	1
Annexin B10 OS=Drosophila melanogaster OX=7227 GN=AnxB10 PE=2 SV=3	P22465	AnxB10	36 kDa	0		1	1
Eukaryotic translation initiation factor 6 OS=Drosophila melanogaster OX=7227 GN=eIF6 PE=2 SV=3	P56538	eIF6	26 kDa	0		1	1
Partner of Y14 and mago OS=Drosophila melanogaster OX=7227 GN=Pym PE=1 SV=1	P82804	Pym	23 kDa	0		1	1
General transcription factor IIF subunit 1 OS=Drosophila melanogaster OX=7227 GN=TfIIFalpha PE=1 SV=3	Q05913	TfIIFalpha	64 kDa	0		1	1
Lysophosphatidylcholine acyltransferase OS=Drosophila melanogaster OX=7227 GN=LPCAT PE=2 SV=1	Q0KHU5	LPCAT	60 kDa	0		1	1
GH08712p OS=Drosophila melanogaster OX=7227 GN=Snr1 PE=1 SV=2	Q24090	Snr1	42 kDa	0		1	1
Hemomucin OS=Drosophila melanogaster OX=7227 GN=Hmu PE=2 SV=1	Q24160 (+9)	Hmu	64 kDa	0		1	1
D.melanogaster coding region cloned by GAL4 enhancer trap line OS=Drosophila melanogaster OX=7227 GN=Chchd3 PE=2 SV=1	Q24269 (+1)	Chchd3	24 kDa	0		1	1
ATP synthase subunit O, mitochondrial OS=Drosophila melanogaster OX=7227 GN=ATPsynO PE=2 SV=2	Q24439 (+1)	ATPsynO	22 kDa	0		1	1
Dicer-2 (Fragment) OS=Drosophila melanogaster OX=7227 GN=Dcr-2 PE=3 SV=1	Q2Q3W1	Dcr-2	197 kDa	0		1	1
IP10437p (Fragment) OS=Drosophila melanogaster OX=7227 GN=BcDNA:GH10614 PE=2 SV=1	Q4V3F7 (+3)	BcDNA	36 kDa	0		1	1
GM10157p (Fragment) OS=Drosophila melanogaster OX=7227 PE=2 SV=1	Q6NL43 (+1)		47 kDa	0		1	1
GH28815p OS=Drosophila melanogaster OX=7227 GN=CG18238 PE=1 SV=1	Q6NL44	CG18238	54 kDa	0		1	1
LP07472p OS=Drosophila melanogaster OX=7227 GN=SKI3 PE=1 SV=1	Q6NNB2	SKI3	140 kDa	0		1	1
RH02355p OS=Drosophila melanogaster OX=7227 GN=CG31037 PE=2 SV=1	Q6NNE1 (+1)	CG31037	218 kDa	0		1	1
RE31204p OS=Drosophila melanogaster OX=7227 GN=Dmel\CG30094 PE=2 SV=1	Q7JR99	Dmel	18 kDa	0		1	1
GEO09647p1 OS=Drosophila melanogaster OX=7227 GN=Dmel\CG12384 PE=1 SV=1	Q7JRC0	Dmel	10 kDa	0		1	1
Electron transfer flavoprotein-ubiquinone oxidoreductase, isoform A OS=Drosophila melanogaster OX=7227 GN=Etf-QO PE=1 SV=1	Q7JWF1	Etf-QO	66 kDa	0		1	1
Adenylate kinase isoenzyme 6 homolog OS=Drosophila melanogaster OX=7227 GN=Ak6 PE=1 SV=1	Q7JYV7	Ak6	20 kDa	0		1	1
LD19356p (Fragment) OS=Drosophila melanogaster OX=7227 GN=elm PE=2 SV=1	Q7K107 (+1)	elm	27 kDa	0		1	1
Peptidylprolyl isomerase OS=Drosophila melanogaster OX=7227 GN=zda PE=1 SV=1	Q7K3D4	zda	45 kDa	0		1	1
CathD, isoform A OS=Drosophila melanogaster OX=7227 GN=cathD PE=1 SV=1	Q7K485	cathD	42 kDa	0		1	1
LD33689p OS=Drosophila melanogaster OX=7227 GN=Dmel\CG8405 PE=1 SV=1	Q7K4L9	Dmel	104 kDa	0		1	1
Dymeclin OS=Drosophila melanogaster OX=7227 GN=CG8230 PE=1 SV=1	Q7KNA0	CG8230	79 kDa	0		1	1
GIGYF family protein CG11148 OS=Drosophila melanogaster OX=7227 GN=CG11148 PE=1 SV=2	Q7KQM6	CG11148	174 kDa	0		1	1
Phospholipid-transporting ATPase OS=Drosophila melanogaster OX=7227 GN=CG13112 PE=3 SV=1	Q7KTG5 (+1)	CG13112	166 kDa	0		1	1
Transmembrane GTPase Marf OS=Drosophila melanogaster OX=7227 GN=Marf PE=1 SV=1	Q7YU24	Marf	91 kDa	0		1	1
SD10043p OS=Drosophila melanogaster OX=7227 GN=Cap-G PE=2 SV=1	Q7YU89	Cap-G	154 kDa	0		1	1
Zinc-finger protein at 72D, isoform B OS=Drosophila melanogaster OX=7227 GN=Zn72D PE=1 SV=1	Q86BI3	Zn72D	96 kDa	0		1	1
RE27227p OS=Drosophila melanogaster OX=7227 GN=CstF64 PE=2 SV=1	Q86NL1 (+1)	CstF64	48 kDa	0		1	1
Putative RNA-binding protein OS=Drosophila melanogaster OX=7227 GN=ytr PE=2 SV=1	Q8I7W6 (+1)	ytr	21 kDa	0		1	1
RE72291p (Fragment) OS=Drosophila melanogaster OX=7227 GN=GM130 PE=2 SV=1	Q8IGK8 (+2)	GM130	96 kDa	0		1	1
RE33889p OS=Drosophila melanogaster OX=7227 GN=CG11414 PE=2 SV=1	Q8IGT4 (+1)	CG11414	96 kDa	0		1	1
Alphabet, isoform B OS=Drosophila melanogaster OX=7227 GN=alph PE=1 SV=1	Q8IMK7 (+2)	alph	41 kDa	0		1	1
GH13542p OS=Drosophila melanogaster OX=7227 GN=vap PE=2 SV=2	Q8IR23	vap	108 kDa	0		1	1
LD24928p OS=Drosophila melanogaster OX=7227 GN=CG5003 PE=2 SV=1	Q8MSW5 (+1)	CG5003	80 kDa	0		1	1
Mitochondrial ribosomal protein S9 OS=Drosophila melanogaster OX=7227 GN=mRpS9 PE=1 SV=1	Q8SXF0	mRpS9	45 kDa	0		1	1
CDP-diacylglycerol--glycerol-3-phosphate 3-phosphatidyltransferase OS=Drosophila melanogaster OX=7227 GN=Dmel\CG7718 PE=2 SV=1	Q8SYL0	Dmel	56 kDa	0		1	1
LD12501p OS=Drosophila melanogaster OX=7227 GN=CG11089 PE=2 SV=1	Q95RT1 (+1)	CG11089	41 kDa	0		1	1
E3 ubiquitin-protein ligase Kcmf1 OS=Drosophila melanogaster OX=7227 GN=Kcmf1 PE=1 SV=1	Q95RX5	Kcmf1	62 kDa	0		1	1
Elongation of very long chain fatty acids protein OS=Drosophila melanogaster OX=7227 GN=Baldspot PE=2 SV=1	Q95T92 (+1)	Baldspot	16 kDa	0		1	1
SD10981p OS=Drosophila melanogaster OX=7227 GN=Dis3 PE=2 SV=1	Q960A7 (+2)	Dis3	112 kDa	0		1	1
GH21853p OS=Drosophila melanogaster OX=7227 GN=Bsg PE=2 SV=1	Q961I4	Bsg	32 kDa	0		1	1
BRCT-domain protein MUS101 OS=Drosophila melanogaster OX=7227 GN=mus101 PE=4 SV=1	Q9GTU6	mus101	158 kDa	0		1	1
Nuclear pore complex protein Nup88 OS=Drosophila melanogaster OX=7227 GN=mbo PE=1 SV=2	Q9GYU8	mbo	79 kDa	0		1	1
CLIP-associating protein OS=Drosophila melanogaster OX=7227 GN=chb PE=1 SV=1	Q9NBD7	chb	166 kDa	0		1	1
Partner of Inscuteable OS=Drosophila melanogaster OX=7227 GN=pins PE=2 SV=1	Q9NH88 (+1)	pins	71 kDa	0		1	1
Delta-A kinase anchor protein 200 OS=Drosophila melanogaster OX=7227 GN=Akap200 PE=2 SV=1	Q9U7E6	Akap200	38 kDa	0		1	1
LD47962p OS=Drosophila melanogaster OX=7227 GN=ND-49 PE=1 SV=2	Q9V4E0	ND-49	53 kDa	0		1	1
Proteasome subunit alpha type-3 OS=Drosophila melanogaster OX=7227 GN=Prosalpha7 PE=1 SV=1	Q9V5C6	Prosalpha7	28 kDa	0		1	1
GH07286p OS=Drosophila melanogaster OX=7227 GN=Dmel\CG13850 PE=1 SV=3	Q9VD14	Dmel	62 kDa	0		1	1
O-GlcNAcase OS=Drosophila melanogaster OX=7227 GN=Oga PE=1 SV=1	Q9VDC9	Oga	114 kDa	0		1	1
Peroxiredoxin 3 OS=Drosophila melanogaster OX=7227 GN=Prx3 PE=1 SV=2	Q9VEJ0	Prx3	26 kDa	0		1	1
c-Myc-binding protein homolog OS=Drosophila melanogaster OX=7227 GN=CG17202 PE=2 SV=2	Q9VG76	CG17202	20 kDa	0		1	1
Heme oxygenase OS=Drosophila melanogaster OX=7227 GN=Ho PE=1 SV=1	Q9VGJ9	Ho	34 kDa	0		1	1
Uncharacterized protein OS=Drosophila melanogaster OX=7227 GN=dTti1 PE=1 SV=1	Q9VH80	dTti1	124 kDa	0		1	1
LD11955p OS=Drosophila melanogaster OX=7227 GN=mib2 PE=1 SV=1	Q9VJ14	mib2	115 kDa	0		1	1
LD23647p OS=Drosophila melanogaster OX=7227 GN=Dmel\CG5787 PE=1 SV=2	Q9VK59	Dmel	100 kDa	0		1	1
Aurora kinase B OS=Drosophila melanogaster OX=7227 GN=ial PE=1 SV=1	Q9VKN7	ial	38 kDa	0		1	1
Farjavit, isoform A OS=Drosophila melanogaster OX=7227 GN=frj PE=2 SV=1	Q9VMD5	frj	56 kDa	0		1	1
GM05057p OS=Drosophila melanogaster OX=7227 GN=Dmel\CG7382 PE=1 SV=1	Q9VMR0	Dmel	27 kDa	0		1	1
LD47277p OS=Drosophila melanogaster OX=7227 GN=Dmel\CG11367 PE=2 SV=3	Q9VNR8	Dmel	40 kDa	0		1	1
LD24714p OS=Drosophila melanogaster OX=7227 GN=Dmel\CG3542 PE=1 SV=1	Q9VQK5	Dmel	91 kDa	0		1	1
LD44813p OS=Drosophila melanogaster OX=7227 GN=Dmel\CG17260 PE=2 SV=1	Q9VQL2	Dmel	42 kDa	0		1	1
GEO06356p1 OS=Drosophila melanogaster OX=7227 GN=Uev1A PE=1 SV=1	Q9VRL1	Uev1A	17 kDa	0		1	1
Probable small nuclear ribonucleoprotein Sm D1 OS=Drosophila melanogaster OX=7227 GN=SmD1 PE=1 SV=1	Q9VU02	SmD1	14 kDa	0		1	1
LD41491p OS=Drosophila melanogaster OX=7227 GN=Pex3 PE=1 SV=1	Q9VUL8	Pex3	44 kDa	0		1	1
Grasp65 OS=Drosophila melanogaster OX=7227 GN=Grasp65 PE=1 SV=1	Q9VW57	Grasp65	48 kDa	0		1	1
GH21048p OS=Drosophila melanogaster OX=7227 GN=Shawn PE=2 SV=2	Q9VWG0	Shawn	42 kDa	0		1	1
RE16337p OS=Drosophila melanogaster OX=7227 GN=Dmel\CG9921 PE=1 SV=1	Q9VXH4	Dmel	11 kDa	0		1	1
LSM12 homolog A OS=Drosophila melanogaster OX=7227 GN=Lsm12 PE=1 SV=2	Q9VYR0	Lsm12	24 kDa	0		1	1
Receptor-mediated endocytosis protein 6 homolog OS=Drosophila melanogaster OX=7227 GN=CG1657 PE=1 SV=2	Q9VZ08	CG1657	191 kDa	0		1	1
Adaptor protein complex AP-3 small chain sigma3 OS=Drosophila melanogaster OX=7227 GN=or PE=1 SV=2	Q9W1E8	or	22 kDa	0		1	1
HL01517p OS=Drosophila melanogaster OX=7227 GN=wmd PE=1 SV=1	Q9W1N4	wmd	36 kDa	0		1	1
Uncharacterized protein, isoform B OS=Drosophila melanogaster OX=7227 GN=Dmel\CG13531 PE=4 SV=1	Q9W1Y8	Dmel	208 kDa	0		1	1
Queuosine salvage protein OS=Drosophila melanogaster OX=7227 GN=Dmel\CG9752 PE=1 SV=1	Q9W2I2	Dmel	40 kDa	0		1	1
LD40707p OS=Drosophila melanogaster OX=7227 GN=l(1)G0289 PE=1 SV=1	Q9W2V9	l	67 kDa	0		1	1
LD17927p OS=Drosophila melanogaster OX=7227 GN=Dmel\CG2972 PE=1 SV=2	Q9W2Y4	Dmel	54 kDa	0		1	1
40S ribosomal protein S28 OS=Drosophila melanogaster OX=7227 GN=RpS28b PE=1 SV=2	Q9W334 (+1)	RpS28b	7 kDa	0		1	1
LD42637p OS=Drosophila melanogaster OX=7227 GN=Aladin PE=1 SV=1	Q9W351	Aladin	52 kDa	0		1	1
LD18904p OS=Drosophila melanogaster OX=7227 GN=schlank PE=1 SV=2	Q9W423	schlank	46 kDa	0		1	1
Augmin complex subunit dgt4 OS=Drosophila melanogaster OX=7227 GN=dgt4 PE=1 SV=1	Q9W4M8	dgt4	21 kDa	0		1	1
LP07417p OS=Drosophila melanogaster OX=7227 GN=Dmel\CG13365 PE=2 SV=1	Q9W5E7	Dmel	14 kDa	0		1	1
HL08141p OS=Drosophila melanogaster OX=7227 GN=Dmel\CG9578 PE=1 SV=2	Q9W5W6	Dmel	32 kDa	0		1	1
Carboxy terminus of Hsp70-interacting protein OS=Drosophila melanogaster OX=7227 GN=STUB1 PE=2 SV=1	Q9XYW6	STUB1	34 kDa	0		1	1
GH11153p (Fragment) OS=Drosophila melanogaster OX=7227 PE=2 SV=1	A9UNE7 (+1)		114 kDa	0		1	1
Mitogen-activated protein kinase kinase kinase 7 OS=Drosophila melanogaster OX=7227 GN=Tak1 PE=2 SV=1	Q9V3Q6	Tak1	76 kDa	0		1	1
GH14572p OS=Drosophila melanogaster OX=7227 GN=Gbp2 PE=1 SV=1	Q7K533	Gbp2	49 kDa	0		1	1
Pros26 protein (Fragment) OS=Drosophila melanogaster OX=7227 GN=Prosbeta6 PE=4 SV=1	O77288 (+1)	Prosbeta6	7 kDa	0		1	1
GEO07170p1 (Fragment) OS=Drosophila melanogaster OX=7227 PE=2 SV=1	A0A1B2AKT8 (+1)		8 kDa	0		1	1
Short wing, isoform O OS=Drosophila melanogaster OX=7227 GN=sw PE=1 SV=1	X2JLF7	sw	71 kDa	0		1	1
CCR4-NOT transcription complex subunit 10, isoform B OS=Drosophila melanogaster OX=7227 GN=Not10 PE=4 SV=1	A0A126GUU0 (+2)	Not10	70 kDa	0		1	1
GEO08987p1 OS=Drosophila melanogaster OX=7227 GN=Dmel\CG5323 PE=1 SV=1	Q7JVK8	Dmel	17 kDa	0		1	1
Protein BCL9 homolog OS=Drosophila melanogaster OX=7227 GN=lgs PE=1 SV=1	Q961D9	lgs	154 kDa	0		1	1
Serine/threonine-protein kinase Smg1 OS=Drosophila melanogaster OX=7227 GN=nonC PE=1 SV=2	Q70PP2 (+1)	nonC	362 kDa	0		1	1
ATP-dependent RNA helicase Ddx1 OS=Drosophila melanogaster OX=7227 GN=Ddx1 PE=2 SV=1	Q9VNV3	Ddx1	81 kDa	0		1	1
LD29995p OS=Drosophila melanogaster OX=7227 GN=drosha PE=2 SV=1	Q960Y4	drosha	123 kDa	0		1	1
Anti-silencing factor 1, isoform B OS=Drosophila melanogaster OX=7227 GN=asf1 PE=1 SV=1	C0MIY4 (+1)	asf1	24 kDa	0		1	1
Acyl carrier protein (Fragment) OS=Drosophila melanogaster OX=7227 PE=2 SV=1	A0A1B2AKC6 (+3)		16 kDa	0		1	1
Mediator of RNA polymerase II transcription subunit 23 OS=Drosophila melanogaster OX=7227 GN=MED23 PE=1 SV=1	Q9W1X7	MED23	167 kDa	0		1	1
Uncharacterized protein, isoform B OS=Drosophila melanogaster OX=7227 GN=Dmel\CG7218 PE=4 SV=1	A0A0B4LH99 (+1)	Dmel	76 kDa	0		1	1
GrpE protein homolog OS=Drosophila melanogaster OX=7227 GN=Roe1-RA PE=2 SV=1	B6IDM7 (+2)	Roe1-RA	24 kDa	0		1	1
Protein ecdysoneless OS=Drosophila melanogaster OX=7227 GN=ecd PE=1 SV=1	Q9W032	ecd	78 kDa	0		1	1
Rab3 GTPase-activating protein catalytic subunit OS=Drosophila melanogaster OX=7227 GN=CG31935 PE=1 SV=2	Q9VQ26	CG31935	104 kDa	0		1	1
FI01445p OS=Drosophila melanogaster OX=7227 GN=thetaTry PE=2 SV=1	A8E6I8 (+1)	thetaTry	28 kDa	0		1	1
Coatomer subunit delta (Fragment) OS=Drosophila melanogaster OX=7227 GN=deltaCOP-RB PE=2 SV=1	F0JAK8 (+3)	deltaCOP-RB	43 kDa	0		1	1
Hpr1 OS=Drosophila melanogaster OX=7227 GN=Hpr1 PE=1 SV=1	Q9VNI8	Hpr1	81 kDa	0		1	1
Odorant-binding protein 99c OS=Drosophila melanogaster OX=7227 GN=Obp99c PE=4 SV=1	|#DECOY#D1FZ89|D1FZ89_DROME-DECOY		?	0		1	1
RE01412p OS=Drosophila melanogaster OX=7227 GN=Grip163 PE=2 SV=1	Q8MT65 (+2)	Grip163	155 kDa	0		1	1
RE65864p OS=Drosophila melanogaster OX=7227 GN=SMC5 PE=2 SV=1	Q7YU66 (+1)	SMC5	118 kDa	0		1	1
SD03094p OS=Drosophila melanogaster OX=7227 GN=mop PE=2 SV=1	Q960G3 (+1)	mop	201 kDa	0		1	1
GILT-like protein 1 OS=Drosophila melanogaster OX=7227 GN=GILT1 PE=1 SV=1	Q95RA9	GILT1	28 kDa	0		1	1
Uncharacterized protein, isoform B OS=Drosophila melanogaster OX=7227 GN=Dmel\CG11007 PE=4 SV=1	A0A0B4LFY2 (+1)	Dmel	31 kDa	0		1	1
Zormin, isoform I OS=Drosophila melanogaster OX=7227 GN=zormin PE=1 SV=2	|#DECOY#Q0E8J3|Q0E8J3_DROME-DECOY		?	0		1	1
Peptide-N(4)-(N-acetyl-beta-glucosaminyl)asparagine amidase OS=Drosophila melanogaster OX=7227 GN=Pngl PE=1 SV=1	Q7KRR5	Pngl	73 kDa	0		1	1
SD09259p OS=Drosophila melanogaster OX=7227 GN=Dmel\CG1907 PE=1 SV=1	Q9VAJ9	Dmel	35 kDa	0		1	1
Host cell factor OS=Drosophila melanogaster OX=7227 GN=Hcf PE=1 SV=2	Q9V4C8	Hcf	160 kDa	0		1	1
Chiffon, isoform D OS=Drosophila melanogaster OX=7227 GN=chif PE=4 SV=1	M9PD16 (+1)	chif	188 kDa	0		1	1
Acyl-CoA synthetase long-chain, isoform J OS=Drosophila melanogaster OX=7227 GN=Acsl PE=1 SV=1	A0A0B4KFE4 (+1)	Acsl	82 kDa	0		1	1
RE16268p OS=Drosophila melanogaster OX=7227 GN=CG2990-RC PE=2 SV=1	E8NH96 (+3)	CG2990-RC	125 kDa	0		1	1
EG:86E4.1 protein OS=Drosophila melanogaster OX=7227 GN=EG:86E4.1 PE=4 SV=1	O46090 (+2)	EG	75 kDa	0		1	1
LP13860p OS=Drosophila melanogaster OX=7227 GN=CG30410 PE=2 SV=1	A9UNB7 (+1)	CG30410	31 kDa	0		1	1
Short stop, isoform AB OS=Drosophila melanogaster OX=7227 GN=shot PE=1 SV=1	|#DECOY#A0A0B4K718|A0A0B4K718_DROME-DECOY		?	0		1	1
IP19992p OS=Drosophila melanogaster OX=7227 GN=mRpL28 PE=1 SV=1	A8E702 (+1)	mRpL28	35 kDa	0		1	1
Adaptor protein complex 2, mu subunit, isoform A OS=Drosophila melanogaster OX=7227 GN=AP-2mu PE=1 SV=1	O62530	AP-2mu	50 kDa	0		1	1
RPS6-p70-protein kinase (Fragment) OS=Drosophila melanogaster OX=7227 GN=S6k PE=3 SV=1	H1ZYE3 (+2)	S6k	45 kDa	0		1	1
Casein kinase ialpha, isoform D OS=Drosophila melanogaster OX=7227 GN=CkIalpha PE=1 SV=1	E1JJI5 (+1)	CkIalpha	40 kDa	0		1	1
Calcium load-activated calcium channel OS=Drosophila melanogaster OX=7227 GN=anon-37B-2 PE=3 SV=1	Q8IA62 (+1)	anon-37B-2	20 kDa	0		1	1
Kismet, isoform C OS=Drosophila melanogaster OX=7227 GN=kis PE=1 SV=1	B7Z002 (+4)	kis	593 kDa	0		1	1
FI21214p1 OS=Drosophila melanogaster OX=7227 GN=CG33123-RA PE=2 SV=1	|#DECOY#T2FFJ2|T2FFJ2_DROME-DECOY		?	0		1	1
Transport and Golgi organization protein 1 OS=Drosophila melanogaster OX=7227 GN=Tango1 PE=1 SV=2	Q9VMA7 (+1)	Tango1	159 kDa	0		1	1
BcDNA.GH12174 OS=Drosophila melanogaster OX=7227 GN=Bap170 PE=2 SV=1	Q7KMJ0	Bap170	126 kDa	0		1	1
Tyrosine-protein kinase OS=Drosophila melanogaster OX=7227 GN=Src64B PE=3 SV=1	M9MSK3 (+2)	Src64B	63 kDa	0		1	1
Ecdysone-inducible gene L2, isoform D OS=Drosophila melanogaster OX=7227 GN=ImpL2 PE=1 SV=1	M9PEL7 (+2)	ImpL2	29 kDa	1	1	0
Protein disulfide-isomerase OS=Drosophila melanogaster OX=7227 GN=Pdi PE=2 SV=1	P54399 (+1)	Pdi	56 kDa	1	1	0
LD30416p OS=Drosophila melanogaster OX=7227 GN=l(2)05287 PE=2 SV=1	Q95RG7 (+1)	l	120 kDa	1	1	0
Conserved oligomeric Golgi complex subunit 3 OS=Drosophila melanogaster OX=7227 GN=Cog3 PE=1 SV=1	Q961G1	Cog3	101 kDa	1	1	0
SD07644p OS=Drosophila melanogaster OX=7227 GN=Dmel\CG6340 PE=2 SV=1	Q9VXU4	Dmel	20 kDa	1	1	0
Nervous fingers 2, isoform B OS=Drosophila melanogaster OX=7227 GN=nerfin-2 PE=4 SV=1	|#DECOY#A0A0B4KH20|A0A0B4KH20_DROME-DECOY		?	0		1	1
GH14278p OS=Drosophila melanogaster OX=7227 GN=Dmel\CG2493 PE=1 SV=1	Q9VIM0	Dmel	54 kDa	0		1	1
LP04985p OS=Drosophila melanogaster OX=7227 GN=mRpL20 PE=1 SV=1	Q9VU36	mRpL20	17 kDa	0		1	1
Uncharacterized protein, isoform B OS=Drosophila melanogaster OX=7227 GN=RRP12 PE=1 SV=1	|#DECOY#X2JEW2|X2JEW2_DROME-DECOY		?	0		1	1
RE65032p (Fragment) OS=Drosophila melanogaster OX=7227 PE=2 SV=1	Q6AWP5 (+2)		96 kDa	0		1	1
LD18774p OS=Drosophila melanogaster OX=7227 GN=OstDelta PE=1 SV=1	Q7K110	OstDelta	69 kDa	0		1	1
Gamma-tubulin complex component OS=Drosophila melanogaster OX=7227 GN=Grip84 PE=1 SV=1	E1JJQ4 (+1)	Grip84	96 kDa	0		1	1
RE01471p OS=Drosophila melanogaster OX=7227 GN=Tdrd3 PE=1 SV=1	Q9VUH8	Tdrd3	92 kDa	0		1	1
Transcription termination factor 5, mitochondrial OS=Drosophila melanogaster OX=7227 GN=mTerf5 PE=1 SV=1	Q9VEB4	mTerf5	65 kDa	0		1	1
Kinesin-like protein (Fragment) OS=Drosophila melanogaster OX=7227 GN=pav PE=2 SV=1	O16048 (+3)	pav	85 kDa	0		1	1
MIP01420p OS=Drosophila melanogaster OX=7227 GN=yellow-g-RA PE=2 SV=1	D0IQ95 (+1)	yellow-g-RA	43 kDa	0		1	1
LD23870p OS=Drosophila melanogaster OX=7227 GN=RnpS1 PE=1 SV=2	Q9VHC0	RnpS1	42 kDa	0		1	1
BcDNA.LD23876 OS=Drosophila melanogaster OX=7227 GN=Dmel\CG11970 PE=1 SV=1	Q9Y0Z1	Dmel	178 kDa	0		1	1
Uncharacterized protein, isoform A OS=Drosophila melanogaster OX=7227 GN=Dmel\CG8841 PE=1 SV=1	Q0E9B5 (+1)	Dmel	96 kDa	0		1	1
Uncharacterized protein, isoform D OS=Drosophila melanogaster OX=7227 GN=anon-EST:fe2C9 PE=1 SV=1	A0A0B4LGI9 (+2)	anon-EST	29 kDa	0		1	1
Mitochondrial ribosomal protein S5, isoform A OS=Drosophila melanogaster OX=7227 GN=mRpS5 PE=1 SV=1	Q8SYP9	mRpS5	46 kDa	0		1	1
Uncharacterized protein OS=Drosophila melanogaster OX=7227 GN=Dmel\CG14309 PE=1 SV=2	Q9VE79	Dmel	111 kDa	0		1	1
Cytochrome c oxidase subunit 4, isoform A OS=Drosophila melanogaster OX=7227 GN=COX4 PE=1 SV=1	Q9VIQ8	COX4	21 kDa	0		1	1
Optic atrophy 1, isoform D OS=Drosophila melanogaster OX=7227 GN=Opa1 PE=1 SV=1	A0A0B4LFB8 (+5)	Opa1	107 kDa	0		1	1
Condensin complex subunit 2 OS=Drosophila melanogaster OX=7227 GN=barr PE=1 SV=1	Q9VIP9	barr	83 kDa	0		1	1
Sponge, isoform F OS=Drosophila melanogaster OX=7227 GN=spg PE=1 SV=1	A0A0B4KHD2 (+2)	spg	228 kDa	0		1	1
FI03455p OS=Drosophila melanogaster OX=7227 GN=CG13750 PE=1 SV=1	A1Z7K2 (+1)	CG13750	68 kDa	0		1	1
Nuclear cap-binding protein subunit 2 (Fragment) OS=Drosophila melanogaster OX=7227 PE=2 SV=1	A0A1B2AJS4 (+1)		18 kDa	0		1	1
GEO10170p1 (Fragment) OS=Drosophila melanogaster OX=7227 PE=2 SV=1	A0A1B2AKN4 (+3)		12 kDa	0		1	1
FI02892p OS=Drosophila melanogaster OX=7227 GN=Marc PE=1 SV=1	A1Z803 (+2)	Marc	38 kDa	0		1	1
ADP-ribosylation factor GTPase activating protein 3, isoform H OS=Drosophila melanogaster OX=7227 GN=ArfGAP3 PE=1 SV=2	A8JNX0 (+2)	ArfGAP3	59 kDa	0		1	1
GPN-loop GTPase (Fragment) OS=Drosophila melanogaster OX=7227 GN=CG3704 PE=3 SV=1	B4F5J7 (+1)	CG3704	35 kDa	0		1	1
CG1751-PA OS=Drosophila melanogaster OX=7227 GN=Spase25 PE=1 SV=1	B4F5U4 (+3)	Spase25	22 kDa	0		1	1
GH28443p (Fragment) OS=Drosophila melanogaster OX=7227 GN=Cpr-RB PE=2 SV=1	D3DMD4 (+3)	Cpr-RB	66 kDa	0		1	1
Bendless, isoform B OS=Drosophila melanogaster OX=7227 GN=ben PE=1 SV=1	E1JJN1 (+1)	ben	17 kDa	0		1	1
Putative dual specificity tyrosine-phosphorylation-regulated kinase 3 homolog OS=Drosophila melanogaster OX=7227 GN=Dyrk3 PE=1 SV=3	P83102	Dyrk3	93 kDa	0		1	1
Chorion protein b at 7F, isoform B OS=Drosophila melanogaster OX=7227 GN=Cp7Fb PE=2 SV=1	Q058X8 (+1)	Cp7Fb	15 kDa	0		1	1
COP9 signalosome complex subunit 8 OS=Drosophila melanogaster OX=7227 GN=CSN8 PE=1 SV=1	Q7KTH8	CSN8	21 kDa	0		1	1
LD28380p OS=Drosophila melanogaster OX=7227 GN=anon-WO0140519.52 PE=1 SV=1	Q8SWW4	anon-WO0140519	191 kDa	0		1	1
GEO09626p1 OS=Drosophila melanogaster OX=7227 GN=ND-MLRQ PE=1 SV=1	Q8SYJ2	ND-MLRQ	9 kDa	0		1	1
Protein vreteno OS=Drosophila melanogaster OX=7227 GN=vret PE=1 SV=1	Q9VCU7	vret	79 kDa	0		1	1
39S ribosomal protein L10, mitochondrial OS=Drosophila melanogaster OX=7227 GN=mRpL10 PE=2 SV=1	Q9VPL3	mRpL10	28 kDa	0		1	1
LP01149p OS=Drosophila melanogaster OX=7227 GN=16769716 PE=1 SV=1	Q9VWF0	16769716	35 kDa	0		1	1
Replication protein A 70 kDa DNA-binding subunit OS=Drosophila melanogaster OX=7227 GN=RpA-70 PE=1 SV=1	|#DECOY#Q24492|RFA1_DROME-DECOY		?	0		1	1
Connector enhancer of KSR protein CNK OS=Drosophila melanogaster OX=7227 GN=cnk PE=1 SV=1	|#DECOY#Q7KNQ9|Q7KNQ9_DROME-DECOY		?	0		1	1
LD46465p OS=Drosophila melanogaster OX=7227 GN=anon-EST:Posey169 PE=1 SV=1	Q9W1V7	anon-EST	53 kDa	0		1	1
LD04327p OS=Drosophila melanogaster OX=7227 GN=Edc3-RB PE=2 SV=1	C6TP77 (+1)	Edc3-RB	73 kDa	0		1	1
Zinc finger protein swm OS=Drosophila melanogaster OX=7227 GN=swm PE=1 SV=1	Q9VIV2	swm	116 kDa	0		1	1
Puffyeye, isoform H OS=Drosophila melanogaster OX=7227 GN=puf PE=1 SV=1	|#DECOY#A0A0B4KI06|A0A0B4KI06_DROME-DECOY		?	0		1	1
Dolichyl-phosphate beta-glucosyltransferase OS=Drosophila melanogaster OX=7227 GN=wol PE=1 SV=1	Q9VLQ1	wol	37 kDa	0		1	1
39 kDa FK506-binding nuclear protein OS=Drosophila melanogaster OX=7227 GN=FK506-bp1 PE=1 SV=2	P54397	FK506-bp1	39 kDa	0		1	1
Probable 39S ribosomal protein L45, mitochondrial OS=Drosophila melanogaster OX=7227 GN=mRpL45 PE=2 SV=1	Q9VCX3	mRpL45	42 kDa	0		1	1
Centrocortin, isoform A OS=Drosophila melanogaster OX=7227 GN=Cen PE=1 SV=1	Q9VIK6	Cen	90 kDa	0		1	1
Protein fem-1 homolog CG6966 OS=Drosophila melanogaster OX=7227 GN=CG6966 PE=2 SV=2	Q9VFD5	CG6966	74 kDa	0		1	1
GH27216p2 OS=Drosophila melanogaster OX=7227 GN=fab1-RA PE=2 SV=1	C7LAB6 (+1)	fab1-RA	205 kDa	0		1	1
Proteasome subunit beta OS=Drosophila melanogaster OX=7227 GN=Prosbeta1 PE=2 SV=1	Q95SA6	Prosbeta1	24 kDa	0		1	1
GM01081p OS=Drosophila melanogaster OX=7227 GN=CG10333 PE=2 SV=1	Q95SF2 (+1)	CG10333	73 kDa	0		1	1
LD46156p (Fragment) OS=Drosophila melanogaster OX=7227 GN=CG10527 PE=2 SV=1	Q8MR08 (+1)	CG10527	33 kDa	0		1	1
Related to the N terminus of tre oncogene, isoform F OS=Drosophila melanogaster OX=7227 GN=RN-tre PE=4 SV=1	|#DECOY#A0A0B4KEQ5|A0A0B4KEQ5_DROME-DECOY		?	0		1	1
Sphingosine-1-phosphate lyase OS=Drosophila melanogaster OX=7227 GN=Sply PE=1 SV=1	Q9V7Y2	Sply	60 kDa	0		1	1
MICOS complex subunit Mic60 OS=Drosophila melanogaster OX=7227 GN=Mitofilin PE=1 SV=4	|#DECOY#P91928|MIC60_DROME-DECOY		?	0		1	1
Adenosine kinase, isoform B OS=Drosophila melanogaster OX=7227 GN=AdenoK PE=1 SV=1	|#DECOY#Q9VU38|Q9VU38_DROME-DECOY		?	0		1	1
Trailer hitch, isoform F OS=Drosophila melanogaster OX=7227 GN=tral PE=1 SV=1	|#DECOY#M9PI44|M9PI44_DROME-DECOY		?	0		1	1
Uncharacterized protein, isoform D OS=Drosophila melanogaster OX=7227 GN=Dmel\CG6118 PE=4 SV=1	A0A0C4DHB3 (+3)	Dmel	109 kDa	0		1	1
26S proteasome non-ATPase regulatory subunit 5 OS=Drosophila melanogaster OX=7227 GN=CG12096 PE=1 SV=3	Q9VYG1 (+1)	CG12096	57 kDa	0		1	1
MIP11944p (Fragment) OS=Drosophila melanogaster OX=7227 GN=CG9203-RA PE=2 SV=1	C5WLS7 (+1)	CG9203-RA	85 kDa	0		1	1
LD40224p OS=Drosophila melanogaster OX=7227 GN=Grx4 PE=1 SV=1	Q9VJZ6	Grx4	24 kDa	0		1	1
Uncharacterized protein, isoform C OS=Drosophila melanogaster OX=7227 GN=Dmel\CG30122 PE=1 SV=1	|#DECOY#E1JGL8|E1JGL8_DROME-DECOY		?	0		1	1
Adaptor protein complex 1, mu subunit OS=Drosophila melanogaster OX=7227 GN=AP-1mu PE=1 SV=1	O62531 (+1)	AP-1mu	49 kDa	0		1	1
La-related protein Larp4B OS=Drosophila melanogaster OX=7227 GN=Larp4B PE=1 SV=2	Q9I7T7	Larp4B	162 kDa	1	1	0
Uncharacterized protein OS=Drosophila melanogaster OX=7227 GN=CG14876 PE=4 SV=1	B7Z0K4 (+2)	CG14876	28 kDa	0		1	1
Zinc finger protein weckle OS=Drosophila melanogaster OX=7227 GN=wek PE=1 SV=1	Q9VJN5	wek	53 kDa	1	1	0
Comatose, isoform B OS=Drosophila melanogaster OX=7227 GN=comt PE=1 SV=1	M9PH10 (+2)	comt	83 kDa	0		1	1
Muscle-specific protein 300 kDa, isoform M OS=Drosophila melanogaster OX=7227 GN=Msp300 PE=1 SV=1	M9PEP8	Msp300	749 kDa	1	1	0
cGMP-dependent protein kinase OS=Drosophila melanogaster OX=7227 GN=for PE=1 SV=1	A0A1W5Q0S1 (+5)	for	83 kDa	0		1	1
40S ribosomal protein S5b OS=Drosophila melanogaster OX=7227 GN=RpS5b PE=2 SV=1	Q9VFE4	RpS5b	26 kDa	0		1	1
RE72321p (Fragment) OS=Drosophila melanogaster OX=7227 GN=CG2691-RA PE=2 SV=1	C5WLN0 (+3)	CG2691-RA	157 kDa	1	1	0
Protein phosphatase 1 regulatory subunit OS=Drosophila melanogaster OX=7227 GN=Gbs-70E PE=2 SV=1	Q8SXW5 (+1)	Gbs-70E	43 kDa	0		0
Multiple ankyrin repeats single KH domain, isoform E OS=Drosophila melanogaster OX=7227 GN=mask PE=4 SV=1	|#DECOY#A0A0B4KHR8|A0A0B4KHR8_DROME-DECOY		?	0		0
Transaldolase OS=Drosophila melanogaster OX=7227 GN=CG2827-RA PE=2 SV=1	B3DMP7 (+1)	CG2827-RA	37 kDa	1	1	0
MIP05689p (Fragment) OS=Drosophila melanogaster OX=7227 GN=Nop60B-RC PE=2 SV=1	C0P8M5 (+3)	Nop60B-RC	60 kDa	1	1	0
NADH dehydrogenase (Ubiquinone) 75 kDa subunit, isoform B OS=Drosophila melanogaster OX=7227 GN=ND-75 PE=1 SV=1	A4V449 (+3)	ND-75	79 kDa	1	1	0
Glorund, isoform C OS=Drosophila melanogaster OX=7227 GN=glo PE=1 SV=1	Q8INJ6 (+1)	glo	20 kDa	1	1	0
AMP deaminase OS=Drosophila melanogaster OX=7227 GN=AMPdeam PE=1 SV=2	D0IQK3 (+7)	AMPdeam	90 kDa	1	1	0
Hu li tai shao, isoform Q OS=Drosophila melanogaster OX=7227 GN=hts PE=1 SV=1	A0A0B4K7A5 (+5)	hts	82 kDa	1	1	0
Msr-110, isoform C OS=Drosophila melanogaster OX=7227 GN=Msr-110 PE=1 SV=1	Q8IQ63	Msr-110	72 kDa	1	1	0
FI21128p1 OS=Drosophila melanogaster OX=7227 GN=lds-RA PE=2 SV=1	A0A0C5K8A0 (+1)	lds-RA	118 kDa	0		1	1
GEO09496p1 (Fragment) OS=Drosophila melanogaster OX=7227 PE=2 SV=1	A0A1B2ALR4 (+1)		6 kDa	0		1	1
Uncharacterized protein, isoform E OS=Drosophila melanogaster OX=7227 GN=Dmel\CG2162 PE=4 SV=2	E1JIB4 (+4)	Dmel	73 kDa	0		1	1
LD29322p OS=Drosophila melanogaster OX=7227 GN=Dmel\CG8507 PE=1 SV=1	Q9VH64	Dmel	45 kDa	0		1	1
Coracle, isoform G OS=Drosophila melanogaster OX=7227 GN=cora PE=1 SV=1	|#DECOY#A0A0B4LG23|A0A0B4LG23_DROME-DECOY		?	0		1	1
Polycomb group protein Psc OS=Drosophila melanogaster OX=7227 GN=Psc PE=1 SV=2	|#DECOY#P35820|PSC_DROME-DECOY		?	0		1	1
LD20207p (Fragment) OS=Drosophila melanogaster OX=7227 GN=glu PE=2 SV=2	|#DECOY#Q9U9P6|Q9U9P6_DROME-DECOY		?	0		1	1
Uncharacterized protein, isoform A OS=Drosophila melanogaster OX=7227 GN=Dmel\CG16789 PE=4 SV=4	|#DECOY#Q9VHB4|Q9VHB4_DROME-DECOY		?	0		1	1
