# Supplementary material for: Mechanisms of PP2A-Ankle2 dependent nuclear reassembly after mitosis
Source: bioRxiv preprint, doi:10.1101/2024.10.07.617051, version 3 (2024-12-03)
Supplement: Supplementary Table 5 [file 617051_file06.xlsx]

## Sheet: Vincent Archambault 2876 proteo
Sequence	Accession	Gene name	Description	Log2(Ankle_R1)	Log2(Ankle_R2)	Log2(Ankle_R3)	Log2(Ankle_R4)	Log2(CTL_R1)	Log2(CTL_R2)	Log2(CTL_R3)	Log2(CTL_R4)	Log2(Ankle2/CTL)	p-val(Ankle2/CTL)
R.LQSS(phos)PPIAQR.T	Q7KMH9	wde	BcDNA.LD26050 OS=Drosophila melanogaster OX=7227 GN=wde PE=1 SV=1	5.33882	2.33478	3.08379	4.75612	-9.2138	-9.36747	-10.187	-11.0763	13.8	2.45e-07	S1053
K.KSAVPVDAS(phos)S(phos)EDEAAASKR.H	Q9VNG4	Xe7	Xe7 isoform D OS=Drosophila melanogaster OX=7227 GN=Xe7 PE=1 SV=3	-1.88734	-0.286786	2.53942	5.66174	-9.51238	-0.787439	-10.2829	-10.1381	9.19	0.00866416	S446,S447
K.SIS(phos)TSSIIAK.E	Q9VIV0	Dmel\CG10188	Uncharacterized protein isoform A OS=Drosophila melanogaster OX=7227 GN=Dmel\CG10188 PE=4 SV=1	1.70643	1.79255	2.56585	2.44057	-9.48404	-10.5128	-9.49529	1.76527	9.06	0.0105636	S273
K.FGSDHKEEIS(phos)ADELD.S	Q9VU04	Dmel\CG32109	RE60105p OS=Drosophila melanogaster OX=7227 GN=Dmel\CG32109 PE=2 SV=2	-0.230102	-1.76493	-1.96496	-1.60612	-9.84723	-9.76462	-10.189	-10.27	8.63	7.28e-08	S179
K.SVINIEAPGS(phos)TDTEHQYQAASPDEIALVK.W	Q4V5C6	CG31729	Phospholipid-transporting ATPase OS=Drosophila melanogaster OX=7227 GN=CG31729 PE=2 SV=1	-1.60336	-1.82027	-1.70534	-0.173587	-9.64987	-9.58915	-9.57388	-10.3092	8.45	1.01e-07	S525
R.SVLTAS(phos)PADLSFASR.S	A1ZAW3	RhoGAP54D	FI17823p1 OS=Drosophila melanogaster OX=7227 GN=RhoGAP54D PE=2 SV=1	5.03324	7.83616	4.90591	4.91127	2.55032	0.247772	-9.44583	-3.923	8.31	0.0116043	S899
R.LST(phos)DGNQ(d)TNNNNNSSSSSNLLFATK.S	E1JI64	syd	Sunday driver isoform D OS=Drosophila melanogaster OX=7227 GN=syd PE=1 SV=1	1.10878	0.465134	0.391026	0.415615	-10.1401	-10.1041	-10.8219	1.25285	8.05	0.0179776	T835
K.LQWGPGGKLEDEAGS(phos)DNESHETHEEDDGALLGK.Y	Q9V9T4	Acf	ATP-dependent chromatin assembly factor large subunit OS=Drosophila melanogaster OX=7227 GN=Acf PE=1 SV=1	-3.09598	-1.51619	-2.46649	-1.72489	-10.7653	-9.32382	-10.2547	-10.1206	7.92	3.01e-07	S925
R.STT(phos)PISLIVS(phos)PTAELTQQQQLHQQQNAGQGGNGR.D	M9PF20	tral	Trailer hitch isoform H OS=Drosophila melanogaster OX=7227 GN=tral PE=1 SV=1	5.89751	5.8247	6.19328	6.56436	6.22298	-10.2083	-8.62239	5.76985	7.83	0.0933112	T219,S226
K.S(phos)MGDLDGVK.L	Q9VUU4	DCP2	Decapping protein 2 isoform A OS=Drosophila melanogaster OX=7227 GN=DCP2 PE=4 SV=4	0.356528	-0.644914	-0.27266	-0.812973	-9.60794	-2.17971	-10.1573	-10.3867	7.74	0.00339407	S503
R.HSST(phos)GSGNSSDTAHLLNTTQTR.R	A0A2Z1Z8F4	red	RedK1-PA OS=Drosophila melanogaster OX=7227 GN=red PE=4 SV=1	-2.42558	-2.23311	-2.19404	-1.98977	-9.92073	-9.47726	-10.0286	-10.1592	7.69	1.55e-09	T307
K.HTLDS(phos)DEEDS(phos)DDYER.E	Q9VKV5	holn1	CD2 antigen cytoplasmic tail-binding protein 2 homolog OS=Drosophila melanogaster OX=7227 GN=holn1 PE=1 SV=1	-3.94956	-1.76988	-1.89988	-2.78015	-9.40777	-10.3271	-10.384	-10.3521	7.52	1.32e-06	S26,S31
R.NSMRS(phos)PNDLISIAGS(phos)KAS(phos)AR.S	Q9W3F7	Miga	Mitoguardin OS=Drosophila melanogaster OX=7227 GN=Miga PE=1 SV=2	-3.82647	-2.70552	-1.47243	-2.29762	-10.0878	-9.55823	-11.3227	-9.43107	7.52	3.79e-06	S72,S82,S85
K.DTDNQ(d)FTKPTASIDERDDSDNLS(phos)QPDSR.Q	M9PB69	Piezo	Piezo-type mechanosensitive ion channel component OS=Drosophila melanogaster OX=7227 GN=Piezo PE=1 SV=1	-4.34305	-2.06568	-1.74636	-1.74758	-10.6382	-9.79158	-10.0346	-9.29548	7.46	5.58e-06	S1872
K.KLVHSISS(phos)EDYTQIKDK.S	H1ZYH4	chico	Uncharacterized protein chico OS=Drosophila melanogaster OX=7227 GN=chico PE=4 SV=1	-0.22038	-4.56769	-3.62977	-2.80373	-10.0786	-9.84896	-10.7058	-10.0756	7.37	5.25e-05	S785
R.TIS(phos)LQQR.N	A0A0B4LGN1	Itp-r83A	Inositol 1 4 5 -tris-phosphate receptor isoform C OS=Drosophila melanogaster OX=7227 GN=Itp-r83A PE=4 SV=1	-0.476286	-0.426188	-3.93888	-3.89744	-9.6758	-9.4142	-9.66691	-9.07872	7.27	8.45e-05	S59
R.SRS(phos)HDDEELAAN(d)AAK.V	Q9VSF2	MED24	Mediator of RNA polymerase II transcription subunit 24 OS=Drosophila melanogaster OX=7227 GN=MED24 PE=1 SV=2	-2.98646	-2.82393	-2.93868	-3.32153	-10.5028	-9.5794	-10.4457	-10.0376	7.12	1.21e-08	S830
K.AC(cam)SLC(cam)LDGVQSTIMGSS(phos)PSNETIVK.I	Q9VM00	RapGAP1	Rap GTPase activating protein 1 isoform D OS=Drosophila melanogaster OX=7227 GN=RapGAP1 PE=4 SV=2	0.188621	-0.674742	0.630145	0.970325	-9.10656	-9.1657	-10.1382	1.03556	7.12	0.0206862	S852
K.NFDLSKS(phos)QEFDK.Q	Q9V9M6	Tif-IA	LD10456p OS=Drosophila melanogaster OX=7227 GN=Tif-IA PE=2 SV=3	-2.7332	0.801448	0.0603182	-0.0328346	-2.32002	-9.02289	-9.76911	-9.21769	7.11	0.00446243	S599
R.KTEATQDAEEHPDKDNSY(phos)SDSDETDELQ(d)KFPGK.M	X2JCI8	Msr-110	Msr-110 isoform D OS=Drosophila melanogaster OX=7227 GN=Msr-110 PE=1 SV=1	-2.97333	-2.58734	-2.70846	-2.32295	-9.84385	-10.1916	-8.78934	-9.99953	7.06	9.5e-08	Y143
R.SS(phos)GAS(phos)AIAVGTELPR.N	Q86P46	CG8046	SD23581p (Fragment) OS=Drosophila melanogaster OX=7227 GN=CG8046 PE=2 SV=1	-0.38657	-0.30282	-2.08479	-1.67512	-10.7227	-10.2854	-10.638	-0.901058	7.02	0.0154749	S34,S37
T.Q(ac)Y(phos)PMHGWVDVTK.E	H5V8E9	CG4065-RB	FI19334p1 OS=Drosophila melanogaster OX=7227 GN=CG4065-RB PE=2 SV=1	-5.12611	-0.800633	-0.353539	1.65045	-9.00612	-6.80755	-10.239	-6.29936	6.93	0.00263512	Y75
K.KHTLDS(phos)DEEDS(phos)DDYER.E	Q9VKV5	holn1	CD2 antigen cytoplasmic tail-binding protein 2 homolog OS=Drosophila melanogaster OX=7227 GN=holn1 PE=1 SV=1	-1.98932	-1.51619	-0.924328	-2.55336	-7.92547	-10.694	-9.49944	-5.91887	6.76	0.000218316	S26,S31
R.TIS(phos)LQQR.N	Q95R71	KrT95D	Krueppel target at 95D isoform D OS=Drosophila melanogaster OX=7227 GN=KrT95D PE=1 SV=1	-3.06781	-2.85511	-3.40295	-3.41649	-9.17593	-10.5456	-9.86494	-10.0217	6.72	8.2e-08	S59
R.EEHS(phos)IDEAEEEAGEADDDRR.S	Q9W3F7	Miga	Mitoguardin OS=Drosophila melanogaster OX=7227 GN=Miga PE=1 SV=2	-3.32185	-3.19744	-2.6011	-3.273	-9.59246	-10.491	-9.13278	-9.97473	6.7	1.19e-07	S209
R.VQIQS(phos)PNNEVDDEGDGAAAAER.K	Q9W2L2	Magi	LD27118p OS=Drosophila melanogaster OX=7227 GN=Magi PE=1 SV=2	-2.58611	-1.19367	-0.60616	-0.905611	-10.22	-10.6066	-1.359	-9.53677	6.61	0.0136137	S749
R.T(phos)TSNSTFASQATDSDERPVDPLGR.Q	A0A0B4LFJ8	Dmel\CG4853	Uncharacterized protein isoform C OS=Drosophila melanogaster OX=7227 GN=Dmel\CG4853 PE=1 SV=1	-0.929281	-4.87771	-3.23737	-3.04935	-6.71978	-10.2475	-10.0734	-10.2679	6.3	0.000579682	T154
R.EAS(phos)VDTLASNLAALC(cam)AVNPDEYR.A	Q9VYB2	Dmel\CG11178	LD19061p OS=Drosophila melanogaster OX=7227 GN=Dmel\CG11178 PE=2 SV=1	-0.855191	-0.642644	-1.30987	-1.33736	-0.154674	-9.3152	-9.68738	-10.1586	6.29	0.0227625	S339
R.SVS(phos)ATLR.R	A1ZAW3	RhoGAP54D	FI17823p1 OS=Drosophila melanogaster OX=7227 GN=RhoGAP54D PE=2 SV=1	1.31673	3.16362	1.00703	1.15749	-10.2503	1.34774	0.818377	-10.3532	6.27	0.075274	S676
K.FPEAQPTEQ(d)LPEPES(phos)PNPIPLPPR.E	Q9I7F7	Ack-like	Activated Cdc42 kinase-like OS=Drosophila melanogaster OX=7227 GN=Ack-like PE=1 SV=3	-5.26632	-3.62726	-2.79189	-2.98055	-9.72169	-10.2729	-9.40843	-10.0555	6.2	7.82e-06	S950
K.Q(d)(ac)GPQS(phos)PKLDEDEGNENTEPK.G	A0A0B4KEI5	Ars2	Arsenic resistance protein 2 isoform E OS=Drosophila melanogaster OX=7227 GN=Ars2 PE=1 SV=1	-2.42558	-2.33935	-2.64892	-2.8277	-3.69345	-10.189	-9.74338	-10.1234	5.88	0.00444924	S423
R.SS(phos)GASAIAVGTELPR.N	Q86P46	CG8046	SD23581p (Fragment) OS=Drosophila melanogaster OX=7227 GN=CG8046 PE=2 SV=1	1.1692	0.842523	-0.805772	-1.16714	-2.07268	-2.32647	-9.16558	-9.83969	5.86	0.0208683	S34
K.HNLNT(phos)S(phos)EEELQSHQPK.R	M9PDR5	spen	Split ends isoform F OS=Drosophila melanogaster OX=7227 GN=spen PE=1 SV=1	2.48945	0.715614	-1.0154	2.05455	-9.95954	-8.99305	1.25011	-1.46172	5.85	0.0589864	T2227,S2228
R.RIS(phos)FSGK.K	Q9VPB2	Spc105R	Spc105-related isoform A OS=Drosophila melanogaster OX=7227 GN=Spc105R PE=4 SV=2	-3.45232	-3.4033	-2.9151	-3.39127	-10.6246	-9.77589	-10.6902	-5.29664	5.81	0.00152527	S36
R.FDS(phos)IDS(phos)DKKPR.A	Q59DP9	PMCA	Calcium-transporting ATPase OS=Drosophila melanogaster OX=7227 GN=PMCA PE=1 SV=3	-4.20473	-3.02203	-2.50998	-3.31813	-9.28963	-5.5863	-10.7399	-10.6102	5.79	0.00131361	S1087,S1090
R.NAQHDTS(phos)PNPVSSK.M	Q9VNG9	plx	Pollux isoform A OS=Drosophila melanogaster OX=7227 GN=plx PE=4 SV=1	0.343477	0.443938	1.87785	1.29566	-9.60821	0.713657	-0.167718	-10.1104	5.78	0.0668547	S67
R.RNS(phos)ETTLLR.F	Q24371	l(2)dtl	Protein lethal(2)denticleless OS=Drosophila melanogaster OX=7227 GN=l(2)dtl PE=1 SV=2	2.44126	0.333017	0.568761	0.148584	1.02828	0.205661	-10.5207	-10.0166	5.7	0.0887738	S712
R.HN(d)SAGSSGSGSGSGGS(phos)PPSDEQSAIR.N	Q9VGI5	Lk6	Lk6 kinase isoform B OS=Drosophila melanogaster OX=7227 GN=Lk6 PE=1 SV=1	-2.94744	-2.93061	-4.58476	-4.67094	-10.1068	-8.89642	-8.89339	-10.0262	5.7	1.4e-05	S987
K.GDSPKS(phos)PQLAFQTSSSPSHR.K	Q9VF04	Rbf2	RE32990p OS=Drosophila melanogaster OX=7227 GN=Rbf2 PE=2 SV=1	-0.0818958	-0.963842	-0.353539	-1.0012	-10.8893	-10.785	-0.59191	-2.75492	5.66	0.0527873	S345
K.TTDDS(phos)PLNR.S	A0A0B4LFE1	Dmel\CG10139	Uncharacterized protein isoform B OS=Drosophila melanogaster OX=7227 GN=Dmel\CG10139 PE=4 SV=1	-3.64905	-3.45652	-3.775	-3.98908	-9.08004	-10.1273	-7.97781	-10.2848	5.65	8.69e-06	S60
K.VPNLVVATVAPQLQQPPLQQHQQ(d)QQTS(phos)PVVVS(phos)PK.Q	Q9W0L7	Usp10	LD28815p OS=Drosophila melanogaster OX=7227 GN=Usp10 PE=1 SV=2	-3.70218	-4.45829	-4.21586	-4.41709	-9.27121	-9.8225	-9.7265	-10.5755	5.65	3.25e-07	S638,S643
R.IEDDS(phos)S(phos)EADDTADKAEK.N	M9PDR5	spen	Split ends isoform F OS=Drosophila melanogaster OX=7227 GN=spen PE=1 SV=1	0.701543	1.67011	-0.324131	2.11081	-9.26524	-10.3537	3.04684	-1.77059	5.63	0.0949559	S1858,S1859
K.WRDES(phos)DDEEGDQKD.N	E8NH46	CG16817-RA	MIP29050p OS=Drosophila melanogaster OX=7227 GN=CG16817-RA PE=2 SV=1	-3.70435	-2.99863	-3.48388	-3.36647	-10.2284	-9.9289	-6.19169	-9.6624	5.61	0.000315267	S117
R.SPNDLISIAGS(phos)KAS(phos)AR.S	Q9W3F7	Miga	Mitoguardin OS=Drosophila melanogaster OX=7227 GN=Miga PE=1 SV=2	-3.49295	-3.25174	-2.93868	-2.08768	-9.84672	-4.46093	-9.9797	-9.58704	5.53	0.00285477	S82,S85
K.Q(ac)GPQ(d)S(phos)PKLDEDEGNENTEPK.G	A0A0B4KEI5	Ars2	Arsenic resistance protein 2 isoform E OS=Drosophila melanogaster OX=7227 GN=Ars2 PE=1 SV=1	-2.42558	-2.33935	-2.64892	-2.8277	-3.69345	-9.0607	-10.1944	-9.38953	5.52	0.00437345	S423
K.DEPLDGAIDS(phos)GSSLDQDGPPPSK.R	A8MPH9	kay	Transcription factor kayak isoforms D/sro OS=Drosophila melanogaster OX=7227 GN=kay PE=1 SV=2	1.45056	1.65174	2.6645	-2.86442	0.2212	-10.2997	-10.5866	1.63977	5.48	0.128416	S544
R.ASPADHVNST(phos)PSPHRT(phos)PPPQR.Q	Q9U4I2	Smr	SANT domain protein SMRTER OS=Drosophila melanogaster OX=7227 GN=Smr PE=2 SV=1	3.20368	2.36329	1.41426	1.94386	-10.0878	4.62522	2.14003	-9.37029	5.4	0.163751	T2540,T2546
R.S(phos)RS(phos)PDENSQ(d)C(cam)SFDSALNHSREEEDQQQQHQHLR.S	X2JIR4	C3G	C3G guanyl-nucleotide exchange factor isoform L OS=Drosophila melanogaster OX=7227 GN=C3G PE=4 SV=1	-3.70435	-3.08226	-2.29693	-2.0449	-3.32829	-9.76807	-9.59116	-9.71264	5.32	0.00857414	S453,S455
R.SKYDDEEEPTDLS(phos)QK.G	M9PBA9	Ef4A	Uncharacterized protein isoform D OS=Drosophila melanogaster OX=7227 GN=Ef4A PE=4 SV=1	-4.58109	-1.9602	-1.38481	-1.45379	-10.0216	-1.59191	-8.68454	-10.3291	5.31	0.0309861	S502
R.ST(phos)DSEEETEDSAC(cam)FSR.K	Q86NY7	RhoGEF4	LD45290p (Fragment) OS=Drosophila melanogaster OX=7227 GN=RhoGEF4 PE=2 SV=1	0.382281	0.834401	-0.426666	1.14984	-10.5844	0.636509	-9.66001	0.293048	5.31	0.0981024	T396
K.S(phos)PDGGISEIETEEEPEN(d)LANSLDDSWR.G	O46043	Parg	Poly(ADP-ribose) glycohydrolase OS=Drosophila melanogaster OX=7227 GN=Parg PE=1 SV=3	1.43833	-4.5236	-4.67296	-4.25229	-9.87069	-10.5478	-3.17487	-9.50455	5.27	0.0365405	S5
K.SC(cam)S(phos)LEQLPTAK.S	Q9VAE7	CG7854	Uncharacterized protein isoform A OS=Drosophila melanogaster OX=7227 GN=CG7854 PE=4 SV=2	-3.2568	-2.45404	-1.96496	-2.36618	-9.88814	-9.93694	-1.92104	-9.28597	5.25	0.0212353	S321
K.LN(d)QELAQTSSSIGGT(phos)PEHS(phos)PLRPR.R	Q8IPK8	Bsg25D	Blastoderm-specific gene 25D isoform C OS=Drosophila melanogaster OX=7227 GN=Bsg25D PE=4 SV=1	0.234587	-0.597995	-0.608522	0.00498089	-10.0581	-9.14942	0.423382	-3.16499	5.25	0.0532967	T407,S411
R.IELDSLDSLPDNMEHEQSS(phos)PSKS(phos)PTFSVK.E	M9PDR8	CdGAPr	Cd GTPase activating protein-related isoform D OS=Drosophila melanogaster OX=7227 GN=CdGAPr PE=1 SV=1	-1.93107	-3.19744	-2.13838	-1.69703	-6.39784	-9.96748	-9.78745	-3.60232	5.2	0.00750884	S1468,S1472
R.IGLDETSNSLAAPEQAIS(phos)ESESEGR.T	A0A0B4K863	cnn	Centrosomin isoform L OS=Drosophila melanogaster OX=7227 GN=cnn PE=1 SV=1	5.64171	4.53324	4.81521	4.34319	4.1698	-0.198566	-10.1988	4.77646	5.2	0.142047	S933
R.RS(phos)PHS(phos)PSISR.S	Q9VZU5	BtbVII	BTB-protein-VII isoform F OS=Drosophila melanogaster OX=7227 GN=BtbVII PE=4 SV=2	0.584397	0.605381	0.0618041	0.267911	-10.3335	0.432552	-0.344802	-8.90081	5.17	0.081487	S703,S706
K.TEAT(phos)QDAEEHPDKDN(d)S(phos)YSDSDETDELQKFPGK.M	X2JCI8	Msr-110	Msr-110 isoform D OS=Drosophila melanogaster OX=7227 GN=Msr-110 PE=1 SV=1	-1.98273	-2.02966	-2.24457	-4.86069	-10.1038	-8.86357	-2.57642	-10.0418	5.12	0.0215003	T130,S142
R.KSSSAS(phos)S(phos)QAPAAVNPR.R	Q9VWH5	Dmel\CG14200	Uncharacterized protein isoform A OS=Drosophila melanogaster OX=7227 GN=Dmel\CG14200 PE=1 SV=1	-9.76253	-2.64068	-2.49243	-3.24852	-9.00179	-9.83458	-9.75197	-9.99297	5.11	0.0147343	S355,S356
K.AVSDNES(phos)EDDVENVVEK.D	Q5U0X8	Dmel\CG12325	LD10780p OS=Drosophila melanogaster OX=7227 GN=Dmel\CG12325 PE=1 SV=1	-4.0126	-4.2728	-2.67838	-4.55036	-9.31128	-10.3587	-9.31194	-6.92598	5.1	0.000256741	S251
R.RKS(phos)TDEGGSALGATNQNS(phos)PPAPNQIVSILK.K	X2JAM4	Svil	Supervillin isoform AE OS=Drosophila melanogaster OX=7227 GN=Svil PE=1 SV=1	2.87906	-0.177631	-1.42171	-1.79997	-3.39146	-10.2262	3.54364	-10.7486	5.08	0.155715	S2488,S2503
R.GSMSNESISPST(phos)T(phos)PPPVQSNKR.R	Q7K003	MrgBP	MRG/MORF4L binding protein OS=Drosophila melanogaster OX=7227 GN=MrgBP PE=1 SV=1	-1.18888	-0.0946474	-2.51884	-2.10222	-9.78338	-1.70786	-9.38393	-5.35447	5.08	0.0245947	T189,T190
R.LLVPQTPPTPAS(phos)PGK.S	Q8MSQ4	Mekk1	Mekk1 isoform B OS=Drosophila melanogaster OX=7227 GN=Mekk1 PE=2 SV=1	-4.48483	-4.83979	-4.51931	-5.65082	-9.92169	-10.0399	-9.2071	-10.6233	5.07	2.48e-06	S1221
R.KAM(ox)IT(phos)NAQ(d)LDNDR.A	Q9VXN3	Dmel\CG8578	LD07988p OS=Drosophila melanogaster OX=7227 GN=Dmel\CG8578 PE=1 SV=2	-3.47249	-5.71673	-6.34074	-6.28507	-10.5951	-10.8149	-10.5241	-10.1459	5.07	8e-05	T137
R.AAS(phos)PERADSVKS(phos)AT(phos)PEPVDTESRR.I	Q9Y0Y6	Madm	Nuclear receptor-binding protein homolog OS=Drosophila melanogaster OX=7227 GN=Madm PE=1 SV=1	-3.37091	-3.53852	-4.34852	-3.02144	-10.0711	-9.03851	-5.12547	-10.2716	5.06	0.00256327	S474,S483,T485
R.KTT(phos)Q(d)EIPTSPIAK.I	Q9U4P9	E(var)3-9	C2H2 zinc-finger protein (Fragment) OS=Drosophila melanogaster OX=7227 GN=E(var)3-9 PE=4 SV=1	-1.29101	-0.90283	-0.847004	-1.28664	-9.67676	-1.02749	-9.24778	-4.51947	5.04	0.0304016	T499
K.DALNEPS(phos)FNLPAAGGGQNFFDGELPAPGPGPVPDETAK.Q	A8JQY2	anon-87Ab	Uncharacterized protein isoform C OS=Drosophila melanogaster OX=7227 GN=anon-87Ab PE=1 SV=1	-3.89658	-4.44241	-4.11303	-4.45766	-9.97152	-7.28778	-9.81503	-9.71461	4.97	6.45e-05	S467
R.SS(phos)PDPEDDEM(ox)S(phos)DGPAAR.R	Q9VN31	Fip1	Factor interacting with poly(A) polymerase 1 OS=Drosophila melanogaster OX=7227 GN=Fip1 PE=1 SV=1	-5.10305	-4.82736	-5.30245	-5.56773	-10.1749	-10.0795	-9.73488	-10.5453	4.93	1.35e-07	S124,S133
K.S(phos)GSAC(cam)S(phos)T(phos)PTKDTLK.G	O61307	Ten-m	Teneurin-m OS=Drosophila melanogaster OX=7227 GN=Ten-m PE=1 SV=2	-3.96247	-1.0973	-1.04389	-2.01707	-6.18632	-9.55947	-7.52816	-4.48677	4.91	0.00357886	S173,S178,T179
R.SRS(phos)T(phos)TPPHWK.H	Q9VAW1	Moca-cyp	Moca-cyp isoform A OS=Drosophila melanogaster OX=7227 GN=Moca-cyp PE=1 SV=1	-3.28896	-2.91958	-3.32787	-3.58808	-7.17116	-9.47958	-9.32303	-6.79077	4.91	0.000125616	S357,T358
R.SYS(phos)LSNVSAAR.D	O46042	Mnt	EG:114E2.2 protein OS=Drosophila melanogaster OX=7227 GN=Mnt PE=4 SV=1	-6.54867	-4.30977	-4.24496	-4.55036	-9.43397	-10.3725	-9.73044	-9.64269	4.88	3.64e-05	S159
R.SLVITDEPLNNTYIES(phos)PPES(phos)SDREVSPK.L	Q8IPK8	Bsg25D	Blastoderm-specific gene 25D isoform C OS=Drosophila melanogaster OX=7227 GN=Bsg25D PE=4 SV=1	-1.71908	-0.124418	-0.906783	-3.50456	-3.45752	-9.64043	-2.41937	-10.2501	4.88	0.0410489	S45,S49
R.NIS(phos)GSSTPSGMQTPR.K	A1Z9J3	shot	Short stop isoform H OS=Drosophila melanogaster OX=7227 GN=shot PE=1 SV=1	-0.487904	1.161	-4.56628	0.926213	-6.27652	-6.15144	-5.226	-4.78172	4.87	0.00563614	S8764
R.SLGS(phos)PEYANN(d)SSNMSSGS(phos)GGGGGGGGGPGGASITQAIAQAAAVAAR.L	A1ZAK7	Psi	LD35640p OS=Drosophila melanogaster OX=7227 GN=Psi PE=1 SV=1	-3.67219	-3.60059	-5.14059	-2.10222	-4.46249	-10.2649	-9.51897	-9.70374	4.86	0.00840162	S72,S86
R.EWEEEGAGGGPGGPSGT(phos)PGRPGGFVGGPK.R	Q9VWN4	Flacc	Fl(2)d-associated complex component OS=Drosophila melanogaster OX=7227 GN=Flacc PE=1 SV=1	-4.91066	-2.93061	-2.10465	1.92156	-9.62162	-2.68204	-9.49079	-5.65999	4.86	0.0445151	T548
R.TNS(phos)RGT(phos)PTSSGDALLDTSFSSAGDAERDHPAYK.S	M9PIC3	ptdss1	Uncharacterized protein isoform B OS=Drosophila melanogaster OX=7227 GN=ptdss1 PE=1 SV=1	0.248656	0.187569	-1.23499	-0.162112	-0.22661	-0.458077	-9.9497	-9.64337	4.83	0.0933606	S8,T11
K.SPC(cam)GS(phos)PGENNDGQVILSADQDANTNTK.A	Q29QU9		IP12935p OS=Drosophila melanogaster OX=7227 PE=2 SV=1	-1.63401	-1.28982	-0.555158	-3.76888	-1.20656	-10.0059	-9.48128	-5.40959	4.71	0.0464798	S137
R.LSDS(phos)PGDC(cam)R.V	E2QC61	bin3	Bicoid-interacting protein 3 isoform B OS=Drosophila melanogaster OX=7227 GN=bin3 PE=1 SV=1	-1.52947	-1.37766	-1.44263	-1.32026	-10.5318	-9.50204	-1.1157	-3.36096	4.71	0.057888	S9
M(ac)DEPS(phos)DDENSEPTPK.K	Q9W4N2	CG6379	Cap-specific mRNA (nucleoside-2'-O-)-methyltransferase 1 OS=Drosophila melanogaster OX=7227 GN=CG6379 PE=2 SV=1	0.10138	0.274185	-0.892324	-0.478163	-0.138063	-0.379048	-9.77987	-9.42941	4.68	0.0978573	S6
K.KTIYS(phos)PFN(d)KK.E	Q9XZ32	Dmel\CG10254	Uncharacterized protein isoform A OS=Drosophila melanogaster OX=7227 GN=Dmel\CG10254 PE=1 SV=1	-3.08182	-2.54434	-3.34352	-3.00768	-1.88359	-9.42911	-9.28478	-10.0642	4.67	0.0322197	S531
K.N(d)GNAS(phos)PGGSHLVAPVSDLDR.A	A0A0B4K7T7	RhoGEF2	Rho guanine nucleotide exchange factor 2 isoform G OS=Drosophila melanogaster OX=7227 GN=RhoGEF2 PE=1 SV=1	-3.28733	-0.743592	-5.16263	-5.95433	-9.51624	-9.71795	-4.81842	-9.78826	4.67	0.0176424	S616
K.KDTS(phos)LERDVNES(phos)GS(phos)EHEQDR.S	Q9VNE0	Dmel\CG2926	Uncharacterized protein isoform A OS=Drosophila melanogaster OX=7227 GN=Dmel\CG2926 PE=1 SV=1	-3.84786	-2.6049	-2.90345	-4.03858	-9.74138	-10.3437	-2.00894	-9.85406	4.64	0.039014	S1030,S1038,S1040
R.AIS(phos)ES(phos)DDDGPKVTK.K	A8JV07	Dmel\CG9915	Uncharacterized protein isoform B OS=Drosophila melanogaster OX=7227 GN=Dmel\CG9915 PE=1 SV=1	-1.59329	0.200266	-1.00603	-0.760118	-9.57343	-2.2136	-0.544772	-9.3294	4.63	0.0690027	S469,S471
R.LADDET(phos)EANTLGSEELEPTYSSK.R	Q7K7T1	EG:63B12.6	EG:63B12.6 protein OS=Drosophila melanogaster OX=7227 GN=EG:63B12.6 PE=4 SV=1	2.20195	1.98827	2.14647	2.18756	1.03562	0.386173	-0.818434	-10.2644	4.55	0.0990712	T234
K.EQIIAPS(phos)YENNEDYDSDEEPIYNEEYGKEESQNK.N	Q9VHP9	Cenp-C	Centromeric protein-C isoform A OS=Drosophila melanogaster OX=7227 GN=Cenp-C PE=1 SV=4	-0.0766237	-0.320847	-0.673793	-0.698041	-0.898899	0.318632	-10.2437	-9.061	4.53	0.10913	S873
R.TQFVDPNADDEDLVNDGLGET(phos)PVS(phos)ER.F	Q7YU20	rb	AP-3 complex subunit beta OS=Drosophila melanogaster OX=7227 GN=rb PE=2 SV=1	-5.61189	-5.9572	-4.49115	-4.14299	-10.3263	-9.348	-10.5023	-8.13434	4.53	0.000177889	T256,S259
R.SS(phos)VSDAGLLSVSN(d)SLFDC(cam)TTSPDKLESDK.L	Q8IQ95	pbl	Pebble isoform D OS=Drosophila melanogaster OX=7227 GN=pbl PE=4 SV=1	-5.61189	-5.59942	-5.97628	-4.69279	-10.6334	-9.53492	-10.206	-9.601	4.52	4.1e-06	S729
R.S(phos)NS(phos)PLDLKPAANIDSLLM(ox)HIK.D	A8MPH9	kay	Transcription factor kayak isoforms D/sro OS=Drosophila melanogaster OX=7227 GN=kay PE=1 SV=2	-1.98273	-0.387677	2.28333	1.88976	-9.24669	2.2422	-10.6654	1.44165	4.51	0.205258	S514,S516
R.ADARS(phos)S(phos)PDPEDDEMS(phos)DGPAAR.R	Q9VN31	Fip1	Factor interacting with poly(A) polymerase 1 OS=Drosophila melanogaster OX=7227 GN=Fip1 PE=1 SV=1	-6.70301	-1.16734	-0.405978	-0.443023	-2.43706	-3.97492	-10.1613	-10.0186	4.47	0.0907336	S123,S124,S133
K.GS(phos)PEVSPVLSDPLLK.R	Q9VEF0	Odj	LD33778p OS=Drosophila melanogaster OX=7227 GN=Odj PE=1 SV=2	-0.843204	-0.719477	0.526338	0.478059	-8.72491	0.0830864	-10.2226	0.476981	4.46	0.128337	S91
K.QQIQQNQTQQVS(phos)PK.A	Q7YU15	klar	Klarsicht isoform B OS=Drosophila melanogaster OX=7227 GN=klar PE=1 SV=1	-0.480922	0.890318	1.48242	2.10291	-9.55786	-0.475101	-2.31023	-1.43873	4.44	0.0554571	S1891
K.TSS(phos)ISPTASSNK.E	Q7YZA2	CG7065	Uncharacterized protein CG7065 OS=Drosophila melanogaster OX=7227 GN=CG7065 PE=1 SV=1	-4.29982	-4.92546	-4.36121	-4.5424	-6.20835	-10.2817	-9.51025	-9.87394	4.44	0.00122913	S574
R.SGYINVDEEDS(phos)DVPMDC(cam)GDELGDQR.T	Q9VBN8	Dmel\CG5039	GEO09012p1 OS=Drosophila melanogaster OX=7227 GN=Dmel\CG5039 PE=2 SV=1	2.89032	4.39512	4.60197	4.43262	1.27149	3.49471	3.85873	-10.0078	4.43	0.181437	S76
R.LAS(phos)SASSTAPAAHPS(phos)DDSEEDEEEEEPSAAR.A	Q9VWP5	htk	Hat-trick isoform D OS=Drosophila melanogaster OX=7227 GN=htk PE=1 SV=4	-4.81859	-3.43594	-3.34825	-3.8698	-9.63869	-4.92028	-9.70995	-8.89126	4.42	0.00437957	S963,S975
R.N(d)NSQQS(phos)TGTVASTGTTPSK.E	Q9VHC8	Dmel\CG8149	LD31448p OS=Drosophila melanogaster OX=7227 GN=Dmel\CG8149 PE=1 SV=1	-3.86715	-4.83979	-4.55166	-4.75119	-10.4666	-5.80303	-9.77585	-9.58464	4.41	0.00263644	S126
K.S(phos)PTPSGPPS(phos)PGR.N	D0IQK1	CG5798-RA	RH33842p OS=Drosophila melanogaster OX=7227 GN=CG5798-RA PE=2 SV=1	-4.85664	-3.87534	-2.81352	-2.46612	-8.74054	-9.86315	-3.39408	-9.59571	4.4	0.019435	S483,S491
K.GDSPKS(phos)PQLAFQTSSS(phos)PSHR.K	Q9VF04	Rbf2	RE32990p OS=Drosophila melanogaster OX=7227 GN=Rbf2 PE=2 SV=1	3.82604	3.26076	3.71255	3.46539	2.14808	-0.511518	-2.16653	-2.75492	4.39	0.00313014	S345,S355
R.TNS(phos)HS(phos)SNHMDAEPQGEASER.R	Q9VNG4	Xe7	Xe7 isoform D OS=Drosophila melanogaster OX=7227 GN=Xe7 PE=1 SV=3	-2.71125	-0.833901	1.6199	4.38453	-0.910137	-10.1221	5.43755	-9.51274	4.39	0.267731	S745,S747
K.IAN(d)VLIGAGTHLLDES(phos)S(phos)DEEPPR.G	Q95SH7	Dmel\CG14969	GH26007p OS=Drosophila melanogaster OX=7227 GN=Dmel\CG14969 PE=1 SV=1	-5.85017	-5.55778	-3.32321	-5.0564	-8.14343	-9.9896	-9.75286	-9.43098	4.38	0.000224165	S284,S285
K.LKNDPDAEIS(phos)DEEGNEDKYVDEVD.M	Q9VAQ7	Slu7	Pre-mRNA-splicing factor Slu7 OS=Drosophila melanogaster OX=7227 GN=Slu7 PE=1 SV=2	-1.30738	-1.57555	-1.35278	-1.5206	-2.59132	-5.24993	-5.94326	-9.37748	4.35	0.0106822	S208
K.ST(phos)GSSPTTTTTTTTGGGTTPQQQR.H	F3YDC5	CG5004-RD	SD11546p OS=Drosophila melanogaster OX=7227 GN=CG5004-RD PE=2 SV=1	2.30653	2.61635	4.22474	2.88276	-9.30848	2.8079	0.41347	0.722519	4.35	0.122949	T58
R.NGEEVKADS(phos)PVKAEPTKR.G	Q9VT00	Jarid2	Jumonji AT rich interactive domain 2 OS=Drosophila melanogaster OX=7227 GN=Jarid2 PE=1 SV=3	-3.96767	-2.88699	-4.28067	-5.30964	-9.25907	-10.0272	-9.74719	-4.59298	4.3	0.0104847	S317
K.VDAPAQNVDAVKEESVPKPEVAANQ(d)NIS(phos)DKQELPPPPNAAPK.V	Q9W366	Dmel\CG12121	RE59932p OS=Drosophila melanogaster OX=7227 GN=Dmel\CG12121 PE=1 SV=1	-3.61604	-4.16988	-4.07074	-4.78834	-5.55121	-9.81888	-8.98859	-9.34164	4.26	0.00216068	S240
R.RQS(phos)FKGS(phos)RDQGLNAR.K	E1JH63	shot	Short stop isoform O OS=Drosophila melanogaster OX=7227 GN=shot PE=1 SV=1	-2.93466	-3.49039	-3.43948	-4.13101	-9.70876	-9.64214	-5.39964	-6.28056	4.26	0.0044916	S4984,S4988
R.S(phos)LT(phos)PVPPPGYNEEEIK.K	Q5LJZ2	Set1	Histone-lysine N-methyltransferase SETD1 OS=Drosophila melanogaster OX=7227 GN=Set1 PE=1 SV=1	-7.45455	-2.66811	-1.82656	-1.5502	-5.3852	-5.80303	-10.0618	-9.25024	4.25	0.0362471	S1057,T1059
K.DRS(phos)QT(phos)TEDEYEDVVPEPR.D	C7LAA5	CG30122-RB	GM15464p OS=Drosophila melanogaster OX=7227 GN=CG30122-RB PE=2 SV=1	-2.36434	-1.69273	-1.02168	-2.28098	-10.4168	-0.824048	-11.2215	-1.82491	4.23	0.135302	S483,T485
R.SM(ox)SIDETPDFDRVNSNS(phos)PPNR.Q	A4UZI0	Khc-73	Kinesin heavy chain 73 isoform C OS=Drosophila melanogaster OX=7227 GN=Khc-73 PE=1 SV=1	4.6317	4.75383	4.33638	3.07077	-10.1331	2.73945	3.57733	3.73648	4.22	0.212961	S1581
R.S(phos)TAGSGGDGSAGTDDDVDSENEKLSPLLSPGSK.S	Q86NN7	CG9941	LD34250p OS=Drosophila melanogaster OX=7227 GN=CG9941 PE=2 SV=1	-1.51039	-1.68337	-2.24457	-0.918424	-10.5688	-1.66817	-1.359	-9.51994	4.19	0.104933	S516
R.S(phos)RS(phos)PQLR.R	P19018	tra2	Transformer-2 sex-determining protein OS=Drosophila melanogaster OX=7227 GN=tra2 PE=1 SV=1	-2.06387	-2.47004	-1.43842	-2.20052	-2.06638	-3.48658	-9.99084	-9.31063	4.17	0.056492	S253,S255
R.LNKS(phos)PANAAPGPSLPR.R	Q8SX63	BRWD3	LD40380p OS=Drosophila melanogaster OX=7227 GN=BRWD3 PE=2 SV=1	-4.1069	-3.73143	-4.63395	-4.54637	-9.87996	-10.8587	-8.12166	-4.78503	4.16	0.0112937	S1223
K.AAASSSEDSS(phos)SEEEVKPAAK.S	M9PFZ1	Nopp140	Nopp140 isoform E OS=Drosophila melanogaster OX=7227 GN=Nopp140 PE=1 SV=1	-3.65742	-4.30402	-4.50868	-4.82165	-10.1147	-9.96607	-3.48311	-10.3145	4.15	0.0293414	S263
R.GGGGGGS(phos)QDLPMRPVDFSNLAPFK.K	E1JJ68	Rm62	Rm62 isoform H OS=Drosophila melanogaster OX=7227 GN=Rm62 PE=1 SV=1	-1.44553	-1.89393	-2.02048	-2.19272	-9.81614	-2.30196	-2.58434	-9.43673	4.15	0.0634425	S83
K.SNAIT(phos)PEPGKDDFGSDPFAALHAPTGQGQVLS(phos)PNAQK.S	Q8MMD2	Eps-15	Epidermal growth factor receptor pathway substrate clone 15 isoform B OS=Drosophila melanogaster OX=7227 GN=Eps-15 PE=1 SV=1	-0.0215546	-0.582689	-0.167938	-0.167838	-9.9044	-0.846025	-0.818434	-5.91161	4.14	0.0765111	T706,S733
K.EKQES(phos)FPKVER.E	Q9W4C1	Dmel\CG15784	IP13321p OS=Drosophila melanogaster OX=7227 GN=Dmel\CG15784 PE=1 SV=1	-4.69281	-4.90791	-4.93693	-4.62821	-9.85307	-9.98475	-5.16295	-10.6886	4.13	0.00864138	S515
M.V(ac)DTNS(phos)SNPGIVGGNSASSAR.L	Q9W0L6	Dmel\CG13907	GH22266p OS=Drosophila melanogaster OX=7227 GN=Dmel\CG13907 PE=1 SV=1	-4.03971	-5.35992	-5.12427	-5.28288	-9.52679	-9.63936	-7.1347	-10.0229	4.13	0.000408257	S7
M(ox)(ac)DS(phos)PTTETTPPPPTLSGPFVGAIDEGTTSAR.F	Q9W0U0	Gk1	GH12641p OS=Drosophila melanogaster OX=7227 GN=Gk1 PE=1 SV=1	-4.82329	-3.91861	-3.30165	-4.7105	-9.67984	-3.7644	-9.92085	-9.87646	4.12	0.0220154	S4
K.SGQVADES(phos)LES(phos)TRR.M	Q9VH76	Snap24	Synaptosomal-associated protein OS=Drosophila melanogaster OX=7227 GN=Snap24 PE=1 SV=1	-5.54824	-5.51067	-5.57799	-5.81363	-9.70678	-10.0307	-10.249	-8.86745	4.1	2.59e-06	S28,S31
R.HENNQNGLEDS(phos)PRR.H	A1ZBH8	hppy	Mitogen-activated protein kinase kinase kinase kinase OS=Drosophila melanogaster OX=7227 GN=hppy PE=1 SV=1	-3.5309	-3.08226	-3.23299	-3.04935	-4.23349	-4.8618	-10.1435	-9.96129	4.08	0.0256481	S497
K.SNHSDS(phos)DVFVEC(cam)LSLHSER.Y	A0A0B4JCV4	tacc	Transforming acidic coiled-coil protein isoform J OS=Drosophila melanogaster OX=7227 GN=tacc PE=1 SV=1	1.30331	2.48242	0.330673	1.52	-10.9211	0.604456	0.128509	-0.414248	4.06	0.153184	S109
R.MLPHAPGVQIQAIPEDAINDES(phos)DDEDKVD.K	Q94517	Rpd3	Histone deacetylase Rpd3 OS=Drosophila melanogaster OX=7227 GN=Rpd3 PE=1 SV=2	-4.29655	-4.1517	-4.18734	-4.12803	-7.16684	-6.5643	-11.7755	-7.40108	4.04	0.00728409	S392
K.QRHS(phos)LDS(phos)AMDENC(cam)R.S	Q7KU45	l(2)k05819	Lethal (2) k05819 isoform C OS=Drosophila melanogaster OX=7227 GN=l(2)k05819 PE=4 SV=1	-4.7861	-2.15989	-1.9529	-1.92369	-9.11468	-5.05304	-10.0669	-2.676	4.02	0.0487371	S978,S981
R.AAS(phos)PERADSVKS(phos)AT(phos)PEPVDTESR.R	Q9Y0Y6	Madm	Nuclear receptor-binding protein homolog OS=Drosophila melanogaster OX=7227 GN=Madm PE=1 SV=1	-2.8603	-3.34311	-3.32321	-2.8277	-9.25822	-4.98124	-4.23846	-9.92346	4.01	0.0187243	S474,S483,T485
R.RLS(phos)NSELSPK.S	X2JAM4	Svil	Supervillin isoform AE OS=Drosophila melanogaster OX=7227 GN=Svil PE=1 SV=1	3.83772	1.13478	-0.0999047	-0.200722	-2.63727	2.30088	-10.8478	-0.138152	4	0.18536	S2207
R.S(phos)APSTPFK.A	Q2PE14	CG4622	Zinc finger CCHC domain-containing protein 8 homolog OS=Drosophila melanogaster OX=7227 GN=CG4622 PE=1 SV=2	-0.72027	-0.693409	-0.915529	-0.630596	-8.6939	-0.30717	-9.45637	-0.488178	4	0.121993	S483
K.SSSLTDFS(phos)PSTTPTPPQR.E	P28167	zfh2	Zinc finger protein 2 OS=Drosophila melanogaster OX=7227 GN=zfh2 PE=1 SV=2	-4.32627	-5.73982	-3.74559	-4.07255	-9.71343	-9.3565	-10.0013	-4.78835	3.99	0.0117476	S2347
M.VDTNS(phos)SNPGIVGGNSASSAR.L	Q9W0L6	Dmel\CG13907	GH22266p OS=Drosophila melanogaster OX=7227 GN=Dmel\CG13907 PE=1 SV=1	-6.40642	-5.54416	-5.49176	-5.81363	-10.1651	-9.88381	-9.59523	-9.57904	3.99	9.9e-07	S7
R.SM(ox)S(phos)RSPS(phos)PVQAAPVAAEPVLDTLEEEEQPEDK.T	A1ZBB4	SAF-A	Uncharacterized protein isoform B OS=Drosophila melanogaster OX=7227 GN=SAF-A PE=1 SV=1	0.809887	-0.803165	0.0603182	-0.246439	-9.57419	-2.2483	-2.53745	-1.70252	3.97	0.0531942	S66,S70
R.K(ac)FS(phos)GGDQ(d)DEATPNKK.Y	M9PFZ1	Nopp140	Nopp140 isoform E OS=Drosophila melanogaster OX=7227 GN=Nopp140 PE=1 SV=1	-1.85088	-1.54981	-4.93219	-3.24368	-4.04084	-3.99442	-9.22465	-10.1703	3.96	0.0471118	S561
R.PVATAAVLATNRESSS(phos)S(phos)TEGR.E	D0IQK3	AMPdeam	AMP deaminase OS=Drosophila melanogaster OX=7227 GN=AMPdeam PE=1 SV=2	-0.490238	1.86611	2.52603	3.47307	-0.791084	0.194938	-9.58078	1.82754	3.93	0.150678	S116,S117
R.SGSQS(phos)MPR.A	A0A0B4K7H9	Dscam1	Down syndrome cell adhesion molecule 1 isoform BI OS=Drosophila melanogaster OX=7227 GN=Dscam1 PE=1 SV=1	-2.87243	-2.91958	-3.06271	-2.96718	-10.4285	-9.39788	-3.73493	-3.97497	3.93	0.0431028	S1831
R.DQIY(phos)QTR.R	A0A0B4K6Y7	pyd	Polychaetoid isoform O OS=Drosophila melanogaster OX=7227 GN=pyd PE=1 SV=1	-2.42558	-2.47004	-2.02048	-2.20052	-2.06638	-3.48658	-8.68613	-10.6051	3.93	0.0710583	Y2011
R.SPS(phos)PVQAAPVAAEPVLDTLEEEEQPEDK.T	A1ZBB4	SAF-A	Uncharacterized protein isoform B OS=Drosophila melanogaster OX=7227 GN=SAF-A PE=1 SV=1	-0.0574557	-1.40049	-0.739568	-0.861639	-9.7514	-3.43238	-3.01643	-2.55807	3.92	0.0394615	S70
K.RPPS(phos)PPPR.H	A1ZBT6	anon-WO0118547.91	Uncharacterized protein isoform C OS=Drosophila melanogaster OX=7227 GN=anon-WO0118547.91 PE=1 SV=1	-1.40092	-4.73165	-1.83207	-2.33149	-10.0864	-0.930381	-4.78152	-10.0843	3.9	0.109671	S214
M.S(ac)(phos)DVDS(phos)DGEEPTRK.T	Q9VG61	Dmel\CG5961	LD45245p OS=Drosophila melanogaster OX=7227 GN=Dmel\CG5961 PE=2 SV=1	-2.84828	-2.23995	-1.90567	-2.55336	-9.71164	-9.60781	-2.99515	-2.82985	3.9	0.0636062	S3,S7
R.HSSHANQS(phos)QS(phos)DDEDTLGGSPSK.K	Q7JVP4	Br140	Bromodomain-containing protein 140kD isoform A OS=Drosophila melanogaster OX=7227 GN=Br140 PE=1 SV=1	-3.19914	-0.449798	-1.41756	-1.43525	-7.61023	-9.76569	-2.58434	-2.13218	3.9	0.064574	S811,S813
R.EELLDEVMN(d)PSPAGYTAASHYDQESVS(phos)PPAVERPR.S	Q4H2F8	Hsf	Heat shock factor isoform C OS=Drosophila melanogaster OX=7227 GN=Hsf PE=1 SV=1	0.492798	-1.20367	-0.900982	-0.763004	-10.2587	-1.05283	-0.433254	-6.13832	3.88	0.110316	S300
R.DDS(phos)PMGPPEK.I	Q9VP05	MED1	Mediator of RNA polymerase II transcription subunit 1 OS=Drosophila melanogaster OX=7227 GN=MED1 PE=1 SV=2	-2.55645	-2.15342	-2.42428	-2.22419	-10.8068	-1.83395	-9.44805	-2.75492	3.87	0.103658	S798
M.GGHDNWNNGQNEEQDDS(phos)ITEPEHMR.K	C8VV67	Hrb98DE-RE	RE34829p OS=Drosophila melanogaster OX=7227 GN=Hrb98DE-RE PE=2 SV=1	-4.80458	-3.05787	-3.22572	-3.76425	-9.42677	-4.46637	-10.7052	-5.69691	3.86	0.0271823	S19
K.SPT(phos)ITS(phos)PDKETPAPLPVDTPK.K	Q8SWW4	anon-WO0140519.52	LD28380p OS=Drosophila melanogaster OX=7227 GN=anon-WO0140519.52 PE=1 SV=1	-1.59832	-5.72438	-2.0142	-1.71368	-3.49426	-3.77617	-8.41928	-10.7999	3.86	0.0757485	T1018,S1021
K.SSS(phos)PTT(phos)PSLEQQPVEDAPPIPGTETAPQEK.M	Q9VMQ7	CG6907	Putative elongator complex protein 4 OS=Drosophila melanogaster OX=7227 GN=CG6907 PE=1 SV=1	-3.11027	-3.52675	-3.6608	-3.6659	-5.08094	-6.16906	-8.50865	-9.59051	3.85	0.00472591	S185,T188
R.AES(phos)PGDNETSTEAEVIGQLNFIR.D	Q9VFX6	TBC1D5	GH10459p OS=Drosophila melanogaster OX=7227 GN=TBC1D5 PE=2 SV=1	-0.888677	-4.49712	-1.22046	0.76526	-3.71694	-10.7128	-3.08221	-3.71301	3.85	0.0846504	S274
K.EMAPT(phos)PEATEAAT(phos)PIKR.E	P28166	zfh1	Zinc finger protein 1 OS=Drosophila melanogaster OX=7227 GN=zfh1 PE=1 SV=2	3.625	3.08193	-2.08479	3.015	-2.19792	-0.464863	-2.98462	-2.04529	3.83	0.0214667	T568,T576
M(ox)(ac)ES(phos)PVVNEVAASLGGEK.L	Q9VEM2	Det	Deterin OS=Drosophila melanogaster OX=7227 GN=Det PE=1 SV=1	-3.44506	-4.56769	-4.40981	-4.7743	-5.3178	-7.35073	-10.1483	-9.64013	3.82	0.00798602	S4
K.FPSIEYEGAHNLEPESPINHSGS(phos)PTPR.N	M9PCQ6	Dlg5	Discs large 5 isoform C OS=Drosophila melanogaster OX=7227 GN=Dlg5 PE=1 SV=1	-3.65532	-4.31554	-2.53672	-3.07782	-3.26488	-10.8285	-5.02286	-9.72769	3.81	0.057711	S1398
R.VYHDRS(phos)AS(phos)PYDNYR.D	P19018	tra2	Transformer-2 sex-determining protein OS=Drosophila melanogaster OX=7227 GN=tra2 PE=1 SV=1	-3.68497	-2.68669	-4.07857	-4.30516	-10.4281	-10.7984	-4.14644	-4.62821	3.81	0.0554303	S213,S215
R.ST(phos)PKAS(phos)PKPQT(phos)PTAAR.L	A4V3G8	ball	Ballchen isoform B OS=Drosophila melanogaster OX=7227 GN=ball PE=1 SV=1	-4.28029	-4.92546	-3.50309	-4.61981	-6.60576	-10.498	-6.9094	-8.46283	3.79	0.00298581	T459,S463,T468
K.HDDGSS(phos)SPTSSMEALR.E	Q9W350	c11.1	C11.1 isoform A OS=Drosophila melanogaster OX=7227 GN=c11.1 PE=1 SV=2	-4.84226	-4.79475	-4.07595	-4.13101	-10.5402	-9.91327	-6.22103	-6.13832	3.74	0.0104072	S1582
K.LNTT(phos)AGDSSNDEDS(phos)DEETASPGGESHDEPR.F	O76902	rush	Pleckstrin homology domain-containing family F member 1 homolog OS=Drosophila melanogaster OX=7227 GN=rush PE=1 SV=1	-6.83732	-5.5374	-5.04026	-5.18674	-9.29545	-10.4926	-8.71025	-9.07079	3.74	0.0001652	T240,S250
K.LSGGSGSGS(phos)SGSLNGK.Q	Q7K4C7	Pcyt1	LD46058p OS=Drosophila melanogaster OX=7227 GN=Pcyt1 PE=1 SV=1	-6.74701	-4.72395	-7.55105	-5.11419	-8.44424	-10.9615	-10.1073	-9.54282	3.73	0.00188336	S476
R.HS(phos)SMDQLIGLLENMGKS(phos)PR.T	A1ZBH8	hppy	Mitogen-activated protein kinase kinase kinase kinase OS=Drosophila melanogaster OX=7227 GN=hppy PE=1 SV=1	-3.29875	-4.18565	-4.05004	-3.83052	-10.5135	-4.93528	-9.42909	-5.39435	3.73	0.0229813	S502,S517
K.DDVGSYHPVFLDGWSPDYLINDELEPPPNS(phos)PPAHVSK.R	Q8IPW1	aru	Arouser isoform A OS=Drosophila melanogaster OX=7227 GN=aru PE=1 SV=1	-0.907275	-0.886628	-0.691209	-0.912003	-0.317204	-1.01748	-9.96583	-6.99942	3.73	0.122103	S521
R.IPQIT(phos)PPAS(phos)PKPPKR.V	E2QCZ8	CG1055	Uncharacterized protein isoform F OS=Drosophila melanogaster OX=7227 GN=CG1055 PE=1 SV=1	-3.15995	-3.11964	-3.59189	-4.10148	-7.73898	-6.11683	-10.6654	-4.34815	3.72	0.0191994	T887,S891
R.RSASTATGTDNPS(phos)PANNPSQAAAEGGR.T	Q9VHI7	Dmel\CG11982	LD47007p OS=Drosophila melanogaster OX=7227 GN=Dmel\CG11982 PE=1 SV=1	-5.086	-5.03072	-7.59833	-3.17903	-10.2109	-9.75358	-9.6917	-6.08841	3.71	0.016933	S341
R.NFS(phos)EEDREQQQQEQLRR.E	P33438	Glt	Glutactin OS=Drosophila melanogaster OX=7227 GN=Glt PE=1 SV=2	-3.75286	-1.80497	-2.00173	-1.09991	-3.89528	-1.25262	-9.2067	-9.15898	3.71	0.0867613	S813
R.QT(phos)SSDGMIVHK.Q	Q961A1	Clamp	LD26873p OS=Drosophila melanogaster OX=7227 GN=Clamp PE=2 SV=1	-4.9564	-5.31876	-4.82285	-5.3577	-10.1423	-10.5987	-6.08893	-8.45326	3.71	0.00529957	T446
K.DKSEGDS(phos)PNIET(phos)PK.K	P91638	smid	Smallminded protein OS=Drosophila melanogaster OX=7227 GN=smid PE=1 SV=1	2.22704	4.11405	5.52997	4.41677	1.51675	-10.067	4.74968	5.30932	3.69	0.300201	S544,T549
K.TSDNS(phos)NTQEFSSSAK.E	Q8MSY3	mor	LD06146p OS=Drosophila melanogaster OX=7227 GN=mor PE=2 SV=1	-4.00457	-3.33576	-3.25206	-4.11322	-10.229	-4.76483	-10.3724	-3.96931	3.66	0.0525971	S220
R.RYNNSNYEGES(phos)DNPEYNHMGDAELDGSGGR.S	X2JJP5	Sec16	Secretory 16 isoform H OS=Drosophila melanogaster OX=7227 GN=Sec16 PE=1 SV=1	-3.5175	-3.13232	-3.98478	-3.43847	-3.60131	-10.453	-4.26878	-10.4015	3.66	0.0691218	S842
R.GM(ox)EDDS(phos)S(phos)DEDKLQQK.L	C5WLN0	CG2691-RA	RE72321p (Fragment) OS=Drosophila melanogaster OX=7227 GN=CG2691-RA PE=2 SV=1	-3.73725	-2.30306	-2.86907	-3.28125	-9.45028	-10.0104	-3.44944	-3.85534	3.64	0.0588046	S1284,S1285
R.GAQEATSQLQEETSSSC(cam)DS(phos)PPATKR.A	Q8IH53	l(3)02640	GH12864p OS=Drosophila melanogaster OX=7227 GN=l(3)02640 PE=2 SV=1	-1.06538	-1.82541	-1.94095	-1.62175	-3.82127	-10.4031	-3.60192	-3.09144	3.62	0.0554586	S234
R.S(phos)YTPASNSSSPVR.V	Q9VCD3	Dmel\CG13605	LP20373p OS=Drosophila melanogaster OX=7227 GN=Dmel\CG13605 PE=2 SV=2	-0.11935	-1.75509	-1.2423	-3.78757	-1.6537	-0.879631	-9.62441	-9.18956	3.61	0.151695	S111
R.SGDADPEVAS(phos)TAS(phos)EK.Q	Q86P46	CG8046	SD23581p (Fragment) OS=Drosophila melanogaster OX=7227 GN=CG8046 PE=2 SV=1	-0.141198	0.526917	-0.726684	-1.74188	-10.2365	-3.34216	-1.55136	-1.39067	3.61	0.104389	S25,S28
R.RAIS(phos)ES(phos)DDDGPK.V	A8JV07	Dmel\CG9915	Uncharacterized protein isoform B OS=Drosophila melanogaster OX=7227 GN=Dmel\CG9915 PE=1 SV=1	-2.80114	-1.74532	-1.71548	-2.38385	-9.86043	-10.204	-1.90607	-1.12127	3.61	0.151713	S469,S471
R.SVS(phos)PTVEAR.G	Q9VNG2	Wdr33	LD24014p OS=Drosophila melanogaster OX=7227 GN=Wdr33 PE=1 SV=2	-0.191599	-0.310004	-0.895204	-0.861639	-10.24	-1.70786	-2.91304	-1.82491	3.61	0.0928816	S633
K.DIS(phos)PTKSDT(phos)TDNVLNFVDVR.Q	B7Z0D7	Dmel\CG7504	Uncharacterized protein isoform B OS=Drosophila melanogaster OX=7227 GN=Dmel\CG7504 PE=4 SV=1	0.26259	0.633739	1.48242	1.19515	0.573577	-2.11424	-0.173682	-9.13189	3.61	0.117401	S691,T697
R.RSS(phos)QSSVEIIER.H	Q0E8J3	zormin	Zormin isoform I OS=Drosophila melanogaster OX=7227 GN=zormin PE=1 SV=2	1.04571	-4.16206	-2.29693	-4.28179	-3.42009	-4.20322	-9.42956	-6.97654	3.58	0.0697221	S1891
K.AKANDDDS(phos)S(phos)DDNDDDDATGVK.L	P91875	RpI1	DNA-directed RNA polymerase I subunit RPA1 OS=Drosophila melanogaster OX=7227 GN=RpI1 PE=1 SV=2	-8.80841	-4.19626	-5.19066	-5.27627	-10.3062	-10.2255	-8.42888	-8.78451	3.57	0.00971529	S1365,S1366
K.FSGQQS(phos)PK.A	Q9VUU4	DCP2	Decapping protein 2 isoform A OS=Drosophila melanogaster OX=7227 GN=DCP2 PE=4 SV=4	-1.07586	-2.39938	-1.02799	-1.34167	-2.26848	-4.46909	-10.9846	-2.41021	3.57	0.0984859	S472
R.SRS(phos)VS(phos)PTVEAR.G	Q9VNG2	Wdr33	LD24014p OS=Drosophila melanogaster OX=7227 GN=Wdr33 PE=1 SV=2	-0.0317212	-0.0792222	-0.171426	-0.250484	-9.69641	-2.3203	-1.86207	-0.894341	3.56	0.0930337	S631,S633
R.ASDANEDS(phos)DEEVSPTKR.S	Q4U2Q2	mus201	XPG variant OS=Drosophila melanogaster OX=7227 GN=mus201 PE=2 SV=1	-3.75735	-3.50022	-3.88751	-4.56237	-10.1449	-4.33128	-5.10254	-10.3882	3.56	0.0459018	S798
R.VPSAPDGGNYNEDDEDS(phos)N(d)GYDNADVNK.E	A0A0B4LGI9	anon-EST:fe2C9	Uncharacterized protein isoform D OS=Drosophila melanogaster OX=7227 GN=anon-EST:fe2C9 PE=1 SV=1	2.96891	1.0033	3.10736	0.843243	-9.04272	-0.602115	0.818377	2.68329	3.52	0.188134	S129
R.RVS(phos)S(phos)DLDPWGR.L	Q9W3D3	Crag	DENN domain-containing protein Crag OS=Drosophila melanogaster OX=7227 GN=Crag PE=1 SV=3	-5.19147	-2.99863	-3.04982	-2.73411	-9.71543	-4.23071	-10.3658	-3.72727	3.52	0.0736198	S1301,S1302
K.KHQPS(phos)DS(phos)ENEDDQDEDDDGNS(phos)SIEER.R	P22058	D1	Chromosomal protein D1 OS=Drosophila melanogaster OX=7227 GN=D1 PE=1 SV=3	-9.24991	-3.44224	-4.1211	-5.33004	-9.43943	-9.76735	-7.74972	-9.26776	3.52	0.025256	S134,S136,S150
R.RPS(phos)S(phos)VAEK.E	Q9VEH0	alt	Aluminum tubes isoform A OS=Drosophila melanogaster OX=7227 GN=alt PE=1 SV=1	-3.91653	-4.37758	-4.04748	-4.13399	-6.48926	-10.0401	-8.90243	-5.09014	3.51	0.0108584	S130,S131
K.DVT(phos)ADGPGSEN(d)GDAGAAGSTN(d)GSSDNQSAASGQR.D	A0A0B4K6U6	sqd	Squid isoform E OS=Drosophila melanogaster OX=7227 GN=sqd PE=4 SV=1	-9.86976	-6.13971	-2.58241	-5.62539	-9.86547	-7.89952	-10.2876	-10.1974	3.51	0.0455229	T22
K.ANAAPVEKHEDNDDDQDDENS(phos)GEEEHS(phos)S(phos)PEKTVVAPK.K	P22058	D1	Chromosomal protein D1 OS=Drosophila melanogaster OX=7227 GN=D1 PE=1 SV=3	-7.79524	-4.77076	-5.19633	-5.81363	-9.58538	-9.79326	-9.53307	-8.63369	3.49	0.0010477	S247,S253,S254
K.NSFIT(phos)PNR.S	A1Z9S6	Su(var)2-HP2	Su(Var)2-HP2 isoform A OS=Drosophila melanogaster OX=7227 GN=Su(var)2-HP2 PE=1 SV=1	-1.97617	-2.5359	-2.80267	-2.81566	-2.29034	-2.56807	-10.0672	-9.1846	3.49	0.107966	T1569
M.M(ox)(ac)DLS(phos)PNNQIEDR.K	A0A1B2AJ79	MED9	Mediator of RNA polymerase II transcription subunit 9 (Fragment) OS=Drosophila melanogaster OX=7227 GN=MED9 PE=2 SV=1	-0.226205	0.66155	0.983698	-0.0328346	-0.750117	-10.2888	-0.497254	-0.962962	3.47	0.155291	S6
K.YES(phos)DS(phos)EEEPGASGK.S	Q7K0X3	Ctr9	Ctr9 isoform A OS=Drosophila melanogaster OX=7227 GN=Ctr9 PE=1 SV=1	-5.61189	-3.01028	-3.03704	-3.56977	-10.238	-10.4025	-4.1071	-4.36044	3.47	0.0786	S955,S957
R.RTS(phos)KGS(phos)LS(phos)PSYKR.P	X2JE07	Dmel\CG1677	Uncharacterized protein isoform D OS=Drosophila melanogaster OX=7227 GN=Dmel\CG1677 PE=1 SV=1	-2.67893	-1.59297	-2.56396	-2.98055	-9.19976	-9.501	-2.68297	-2.2761	3.46	0.0987552	S801,S804,S806
R.LLS(phos)PTLEEHETSDGN(d)QSFGVISSAK.D	A0A0B4JCV4	tacc	Transforming acidic coiled-coil protein isoform J OS=Drosophila melanogaster OX=7227 GN=tacc PE=1 SV=1	6.03069	0.633739	6.16764	-1.33736	-0.219602	-0.43958	-0.776988	-0.848177	3.44	0.0867493	S927
R.TNS(phos)LPSIVFPIETK.S	B7Z043	Mrtf	Myocardin-related transcription factor isoform H OS=Drosophila melanogaster OX=7227 GN=Mrtf PE=4 SV=3	-3.96767	-4.54717	-4.41311	-4.26533	-10.56	-4.84046	-5.63608	-9.89493	3.43	0.0355389	S1321
R.S(ac)PAVEQKKS(phos)VDFNNDTDDLEVEK.K	Q8INM3	sle	Protein slender lobes OS=Drosophila melanogaster OX=7227 GN=sle PE=1 SV=1	-4.62968	-8.86684	-9.12015	-3.56171	-9.32601	-10.783	-9.62433	-10.1695	3.43	0.0362311	S498
M(ac)DDATS(phos)QNSAATPMTR.E	Q4V5C6	CG31729	Phospholipid-transporting ATPase OS=Drosophila melanogaster OX=7227 GN=CG31729 PE=2 SV=1	0.979766	1.12815	0.999292	1.66663	-10.6166	0.468611	0.788013	0.42422	3.43	0.218679	S7
R.VN(d)T(phos)PTPPIDQNSDDVPSRNPS(phos)PSR.T	Q9VHP9	Cenp-C	Centromeric protein-C isoform A OS=Drosophila melanogaster OX=7227 GN=Cenp-C PE=1 SV=4	-1.91844	-2.47004	-3.49258	-1.91083	-9.50876	5.7194	-9.39157	-10.3156	3.43	0.363249	T998,S1016
K.SEESPEKHDTADNLEDKNS(phos)DAEESTK.I	M9NEL3	kis	Kismet isoform F OS=Drosophila melanogaster OX=7227 GN=kis PE=1 SV=1	-3.77318	-3.63626	-3.79208	-3.71647	-10.2582	-9.62248	-4.38851	-4.34082	3.42	0.0517265	S3387
K.QLDS(phos)LQSIGESSGYESFK.W	M9PB19	FBgn0025681	Uncharacterized protein isoform D OS=Drosophila melanogaster OX=7227 GN=FBgn0025681 PE=4 SV=1	-4.7724	-4.5004	-4.95605	-4.81206	-9.96148	-3.05943	-9.88733	-9.81192	3.42	0.0628245	S612
R.GPS(phos)PNTHTTGGVTNSASLVGSGNNSGHSGNANANEK.T	Q59E36	CoRest	REST corepressor OS=Drosophila melanogaster OX=7227 GN=CoRest PE=1 SV=2	2.44126	2.77965	2.30545	2.59789	2.13789	2.42077	-10.4134	2.35953	3.4	0.276208	S23
K.V(ac)IQ(d)GLEDNEDS(phos)QGEAPNLK.L	Q8IGK0	cg	RE74316p OS=Drosophila melanogaster OX=7227 GN=cg PE=2 SV=1	-4.77695	-4.97028	-3.60692	-3.02144	-6.19729	-4.05866	-9.8889	-9.839	3.4	0.0415724	S232
R.ADS(phos)VKS(phos)AT(phos)PEPVDTESRR.I	Q9Y0Y6	Madm	Nuclear receptor-binding protein homolog OS=Drosophila melanogaster OX=7227 GN=Madm PE=1 SV=1	-2.12786	-1.7164	-1.98323	-1.73619	-6.09116	-7.0902	-3.70871	-4.28587	3.4	0.00210679	S480,S483,T485
K.AVIISS(phos)DEDEVVSPPETK.K	P35600	Gnf1	Replication factor C subunit 1 OS=Drosophila melanogaster OX=7227 GN=Gnf1 PE=1 SV=2	-5.16735	-4.80689	-5.4573	-5.23722	-6.54423	-10.6766	-10.6144	-6.3573	3.38	0.0182148	S42
R.GAET(phos)VTPPDSDYDSS(phos)DIEDLDDTK.M	C1C5B1	cact-RB	RE25277p OS=Drosophila melanogaster OX=7227 GN=cact-RB PE=2 SV=1	-6.6156	-2.71502	-2.92684	-2.31446	-2.47828	-4.14976	-10.9825	-10.4808	3.38	0.162353	T458,S469
R.KDHDVEGEPVKLDEEDDT(phos)EN(d)EAEAPLVVPK.R	Q9VX34	Dmel\CG5800	RNA helicase OS=Drosophila melanogaster OX=7227 GN=Dmel\CG5800 PE=1 SV=2	-3.59579	-4.01393	-3.58258	-3.25826	-4.09624	-3.90681	-9.78629	-10.1636	3.38	0.0685076	T609
R.SADNEEEEEEHS(phos)ATAAGC(cam)GSNSSGHR.Q	Q9VWR8	CG6659	C-mannosyltransferase dpy-19 homolog OS=Drosophila melanogaster OX=7227 GN=CG6659 PE=2 SV=1	-3.53668	-3.25174	-3.08885	-3.85741	-9.61528	-3.72967	-4.27903	-9.57771	3.37	0.0561433	S594
K.ANDDDS(phos)S(phos)DDNDDDDATGVK.L	P91875	RpI1	DNA-directed RNA polymerase I subunit RPA1 OS=Drosophila melanogaster OX=7227 GN=RpI1 PE=1 SV=2	-8.0057	-3.5675	-3.33881	-3.68548	-9.02852	-10.0253	-5.84862	-7.128	3.36	0.0387397	S1365,S1366
K.QVPTS(phos)PK.E	Q9VCX1	loco	Regulator of G-protein signaling loco OS=Drosophila melanogaster OX=7227 GN=loco PE=1 SV=2	-2.5467	-3.21083	-2.50998	-2.63561	-3.2955	-9.88846	-4.53744	-6.63933	3.36	0.0374769	S1501
R.M(ox)THDIDQS(phos)TSSPPQS(phos)PSTMSSLLGR.G	Q9VB49	mrt	Martik isoform A OS=Drosophila melanogaster OX=7227 GN=mrt PE=4 SV=1	-1.09706	-0.635858	-1.02483	-1.57535	-1.91155	-0.725018	-4.36376	-10.776	3.36	0.143208	S483,S490
D.GRYS(phos)PPPTR.N	Q961V3	Dmel\CG2246	GH05377p OS=Drosophila melanogaster OX=7227 GN=Dmel\CG2246 PE=1 SV=1	-4.85183	-5.17017	-5.41039	-6.76773	-9.8989	-7.67647	-9.05621	-8.98252	3.35	0.000601575	S214
K.TMST(phos)PVGS(phos)LQTGHEVIISPNKDR.H	A0A0B4KHL4	gish	Gilgamesh isoform L OS=Drosophila melanogaster OX=7227 GN=gish PE=1 SV=1	-5.56389	-4.15428	-4.49115	-4.67528	-6.94536	-10.12	-10.2267	-4.97606	3.35	0.0261777	T359,S363
R.SRPPSFAGGDS(phos)PVLR.S	A1Z7A6	Asap	ArfGAP with SH3 domain ANK repeat and PH domain-containing protein OS=Drosophila melanogaster OX=7227 GN=Asap PE=1 SV=1	-0.0505481	-1.31851	-0.162723	-0.370802	-10.3417	-4.57963	-0.417246	0.126899	3.33	0.175484	S738
F.SKYGLGDS(phos)DEEDELPTDPKK.A	Q9VCH5	Nup98-96	Nuclear pore complex protein Nup98-Nup96 OS=Drosophila melanogaster OX=7227 GN=Nup98-96 PE=1 SV=3	-3.4799	-4.06893	-9.17141	-4.42073	-8.64603	-8.72142	-8.37072	-8.68718	3.32	0.0266905	S1037
R.YES(phos)S(phos)HEEGKLK.S	Q24325	Taf2	Transcription initiation factor TFIID subunit 2 OS=Drosophila melanogaster OX=7227 GN=Taf2 PE=1 SV=2	-2.76677	-2.54434	-3.33724	-3.94909	-9.62138	-10.0507	-2.64105	-3.57628	3.32	0.106043	S1136,S1137
K.VEEDDGGNVS(phos)VK.M	O18401	D19A	D19A protein OS=Drosophila melanogaster OX=7227 GN=D19A PE=2 SV=2	-0.831316	-0.244879	-0.490571	-0.471066	0.141802	-10.504	0.509647	-5.4669	3.32	0.203665	S165
R.SQQLQHQQS(phos)ENGSSANTSGQDQDTFEPR.P	Q7JRH5	Dmel\CG5726	RE28271p OS=Drosophila melanogaster OX=7227 GN=Dmel\CG5726 PE=1 SV=1	-4.01798	-3.64169	-2.90345	-3.74358	-4.65703	-4.26109	-9.62029	-9.02796	3.31	0.0376968	S343
K.DVLQNIQSDDDEET(phos)YDLNNLAK.E	Q9VXK5	Dmel\CG8939	Putative rRNA methyltransferase OS=Drosophila melanogaster OX=7227 GN=Dmel\CG8939 PE=1 SV=1	0.516249	-0.972366	0.537061	-0.0987578	-6.17543	-0.10285	-7.10887	0.170264	3.3	0.106773	T549
K.GSLS(phos)PSYK.R	X2JE07	Dmel\CG1677	Uncharacterized protein isoform D OS=Drosophila melanogaster OX=7227 GN=Dmel\CG1677 PE=1 SV=1	-3.08182	-3.34902	-3.36412	-3.5577	-9.32968	-9.94042	-3.79434	-3.39849	3.28	0.0777197	S806
K.VAEKDS(phos)ES(phos)DVDAGT(phos)EDEKSAQPQK.V	Q9VX35	CC4	LD36501p OS=Drosophila melanogaster OX=7227 GN=CC4 PE=1 SV=1	-1.88734	-0.952555	-1.33703	-1.26194	-2.67511	-11.0088	-2.27134	-2.50936	3.26	0.137074	S179,S181,T187
K.TTTAVPGAGT(phos)PES(phos)SDDDNSTKR.N	Q59E36	CoRest	REST corepressor OS=Drosophila melanogaster OX=7227 GN=CoRest PE=1 SV=2	0.444722	0.454575	0.547705	0.428322	-9.65231	-0.785314	0.128509	-0.822446	3.25	0.162656	T66,S69
R.RRIS(phos)ELSDQSAN(d)GTGDLR.S	Q9VWE6	CG14215	Protein ELYS homolog OS=Drosophila melanogaster OX=7227 GN=CG14215 PE=1 SV=2	-0.419564	-0.783033	-0.900982	-6.27185	-7.06888	-5.70338	-4.39965	-4.16023	3.24	0.0542584	S2063
R.LRAQ(d)S(phos)DDGSDAET(phos)GVDGAALEEFQQSR.R	Q960C4	CG7971	SD07741p OS=Drosophila melanogaster OX=7227 GN=CG7971 PE=2 SV=1	-1.94382	-0.823583	-1.22771	-1.27424	-6.25344	-4.59444	-6.77132	-0.594854	3.24	0.0397876	S861,T869
R.LNEST(phos)NPSLIPSGPQPASATSAER.S	Q9V3W9	Rad23	DNA repair protein Rad23 OS=Drosophila melanogaster OX=7227 GN=Rad23 PE=1 SV=1	-6.43636	-6.40913	-6.54415	-6.82063	-9.34753	-9.88221	-10.3552	-9.57499	3.24	3.23e-06	T214
R.KNS(phos)NSETMTNGK.K	I1V4Y5	JIL-1	Non-specific serine/threonine protein kinase OS=Drosophila melanogaster OX=7227 GN=JIL-1 PE=4 SV=1	-0.907275	-5.8361	-4.69287	-3.99994	-4.30586	-4.0403	-10.1637	-9.8585	3.23	0.115893	S62
R.S(phos)MHS(phos)LHS(phos)LR.S	Q59DP9	PMCA	Calcium-transporting ATPase OS=Drosophila melanogaster OX=7227 GN=PMCA PE=1 SV=3	-6.3362	-2.19271	-2.17292	-2.12432	-10.3712	-3.62716	-5.48013	-6.2166	3.22	0.0840958	S1130,S1133,S1136
K.QYS(phos)VESPTETAAPMPPPVPTR.H	Q86B74	WASp	WASp isoform C OS=Drosophila melanogaster OX=7227 GN=WASp PE=4 SV=1	-3.3952	-2.64068	-5.31474	-2.86442	-2.77431	-2.95066	-10.4826	-10.8075	3.2	0.173113	S273
K.QQAPVTLNPS(phos)WESK.L	Q9VMB6	Ent2	Equilibrative nucleoside transporter 2 isoform A OS=Drosophila melanogaster OX=7227 GN=Ent2 PE=1 SV=1	-4.73205	-4.17774	-4.72531	-4.2951	-5.9923	-4.10879	-10.4875	-10.0951	3.19	0.0598313	S25
R.T(phos)RST(phos)PS(phos)PLVKEDR.A	Q9VNE0	Dmel\CG2926	Uncharacterized protein isoform A OS=Drosophila melanogaster OX=7227 GN=Dmel\CG2926 PE=1 SV=1	-2.81278	-1.91021	-2.00796	-1.89175	-5.34805	-3.29303	-2.01965	-10.724	3.19	0.111048	T959,T962,S964
R.EN(d)AGS(phos)DDENAKPLSHAQR.Y	Q8SY39	CG6994	ATP-dependent RNA helicase OS=Drosophila melanogaster OX=7227 GN=CG6994 PE=1 SV=1	-6.1241	0.00857559	-0.532559	-0.362023	-4.43626	-4.69935	-5.32341	-5.22297	3.17	0.0497219	S736
R.KLT(phos)DNVINIQ(d)AISDSSDEGLGSMSPEPMTLLTAGGAAATK.L	Q9V406	crp	Activator protein 4 OS=Drosophila melanogaster OX=7227 GN=crp PE=1 SV=1	-3.67856	-3.59883	-8.65894	-3.1335	-9.90846	-9.37645	-9.78274	-2.69923	3.17	0.152466	T207
R.SEEPQFNENPTSDPVAVASLS(phos)PAKEITR.E	Q9W1A9	enok	Histone acetyltransferase OS=Drosophila melanogaster OX=7227 GN=enok PE=1 SV=2	-3.09598	-4.2395	-3.55316	-3.16675	-9.09852	-2.51781	-10.4484	-4.58719	3.15	0.107469	S1231
R.RSS(phos)EDS(phos)VEEEGR.S	Q9VXN3	Dmel\CG8578	LD07988p OS=Drosophila melanogaster OX=7227 GN=Dmel\CG8578 PE=1 SV=2	-5.14364	-4.61317	-4.709	-5.06207	-10.0014	-11.06	-5.73139	-5.31088	3.14	0.0503139	S106,S109
R.S(phos)PDPTDM(ox)MR.S	Q8IPW1	aru	Arouser isoform A OS=Drosophila melanogaster OX=7227 GN=aru PE=1 SV=1	-3.70218	-3.93406	-3.02437	-3.78522	-10.4674	-3.13317	-3.1278	-10.262	3.14	0.143025	S785
K.LIGAQLPESPS(phos)SSAGPSVTGLTVAGSGGDGNANATGGGDASDK.T	X2J5X6	loqs	Loquacious isoform F OS=Drosophila melanogaster OX=7227 GN=loqs PE=1 SV=1	-2.09196	-0.441885	-0.322191	0.795	-0.176559	-1.64872	-2.06882	-10.6309	3.12	0.201883	S215
D.AS(phos)NGLAPATALQEDLVK.T	X2JE07	Dmel\CG1677	Uncharacterized protein isoform D OS=Drosophila melanogaster OX=7227 GN=Dmel\CG1677 PE=1 SV=1	-0.7148	0.0817611	0.174608	0.0858052	-3.06953	-2.09833	-3.57642	-4.08692	3.11	0.000191692	S264
K.ET(phos)GS(phos)GGSTGTLS(phos)PTGSHK.M	Q9I7T7	Larp4B	La-related protein Larp4B OS=Drosophila melanogaster OX=7227 GN=Larp4B PE=1 SV=2	-5.36569	-3.62906	-6.57929	-4.67528	-9.79448	-9.89196	-8.05674	-4.9277	3.11	0.0350147	T1404,S1406,S1414
R.M(ac)DWDS(phos)LDIGQSENSPTASQSGDLPSK.V	Q8SY59	gem	GH01967p OS=Drosophila melanogaster OX=7227 GN=gem PE=1 SV=1	-4.34982	5.43591	-0.176673	0.227769	0.402454	-4.43939	-3.33943	-3.8977	3.1	0.177699	S195
R.EEHS(phos)IDEAEEEAGEADDDRRS(phos)R.K	Q9W3F7	Miga	Mitoguardin OS=Drosophila melanogaster OX=7227 GN=Miga PE=1 SV=2	-3.29221	-3.23797	-0.38356	-2.6677	-10.4342	-1.34975	-0.890273	-9.31791	3.1	0.234268	S209,S226
R.SNS(phos)LVGLVPK.T	Q9VGL0	Dmel\CG14712	LD43047p OS=Drosophila melanogaster OX=7227 GN=Dmel\CG14712 PE=1 SV=3	-4.81391	-5.74761	-4.59222	-4.61563	-5.3978	-10.8923	-6.74125	-9.10368	3.09	0.0296117	S164
R.KLGTDSLNSS(phos)FQQDEDTR.A	Q9W2M0	Rbpn-5	LD23155p OS=Drosophila melanogaster OX=7227 GN=Rbpn-5 PE=1 SV=2	-4.91066	-5.17541	-4.87193	-5.18055	-9.76343	-9.91577	-6.24093	-6.56918	3.09	0.0112541	S182
K.TDTIT(phos)IDSDNEDDMPSTSTATQQEQPQETAIMK.I	A1Z8R2	ADD1	ADD domain-containing protein 1 isoform A OS=Drosophila melanogaster OX=7227 GN=ADD1 PE=1 SV=1	1.84252	2.64217	1.98746	1.76508	0.208267	-10.893	4.97698	1.59671	3.09	0.355563	T650
R.NST(phos)PQHAPTSSAR.Q	Q961V3	Dmel\CG2246	GH05377p OS=Drosophila melanogaster OX=7227 GN=Dmel\CG2246 PE=1 SV=1	-5.80298	-2.0356	-7.08548	-2.40173	-5.81285	-6.43077	-7.32335	-10.059	3.08	0.0663354	T222
K.HNTASN(d)SPKS(phos)PFGTHS(phos)PK.H	Q9VP05	MED1	Mediator of RNA polymerase II transcription subunit 1 OS=Drosophila melanogaster OX=7227 GN=MED1 PE=1 SV=2	-4.09264	-3.61475	-4.25973	-5.10245	-9.13458	-10.4862	-4.28418	-5.35447	3.05	0.0619058	S876,S882
K.LT(phos)VAS(phos)DS(phos)EDSDC(cam)QTSTSNVDVPAAR.N	Q9VX35	CC4	LD36501p OS=Drosophila melanogaster OX=7227 GN=CC4 PE=1 SV=1	-1.83893	-4.73939	-6.44492	-5.04511	-4.29698	-8.71623	-9.51282	-7.74334	3.05	0.0598768	T51,S54,S56
R.LNS(phos)NSGGTPATTPGSVTPRPR.G	Q9NBD7	chb	CLIP-associating protein OS=Drosophila melanogaster OX=7227 GN=chb PE=1 SV=1	-7.28672	-5.52397	-6.63213	-7.6169	-10.2302	-9.21219	-10.4337	-9.30917	3.03	0.000588738	S635
R.AGS(phos)MSNLQGEDGSDTK.D	M9MRN1	Svil	Supervillin isoform AG OS=Drosophila melanogaster OX=7227 GN=Svil PE=4 SV=1	1.55048	1.05315	1.95584	1.99173	1.24007	-10.2898	1.45242	2.01166	3.03	0.297886	S775
R.EEHSIDEAEEEAGEADDDRRS(phos)R.K	Q9W3F7	Miga	Mitoguardin OS=Drosophila melanogaster OX=7227 GN=Miga PE=1 SV=2	-1.69734	-1.87782	-1.85432	-2.11692	-2.61871	-2.59759	-4.20387	-10.2154	3.02	0.107989	S226
K.RHS(phos)WS(phos)PR.S	Q6NR26	CG18490	RE33713p OS=Drosophila melanogaster OX=7227 GN=CG18490 PE=2 SV=1	-4.43002	-3.42186	-4.39669	-3.80412	-9.88383	-11.1157	-3.47572	-3.60671	3.01	0.147696	S310,S312
K.TVQDNDEDYS(phos)PKK.S	O16810	Orc1	Origin recognition complex subunit 1 OS=Drosophila melanogaster OX=7227 GN=Orc1 PE=1 SV=2	-4.53794	-1.60176	-4.05519	-3.25989	-2.41288	-9.70214	-2.88341	-10.4902	3.01	0.183984	S482
K.SKKES(phos)S(phos)EEDDDVDDKDES(phos)DEDEPLTK.K	A1ZAK4	Dek	Dek isoform A OS=Drosophila melanogaster OX=7227 GN=Dek PE=1 SV=1	-5.95979	-2.43036	-1.95892	-1.93666	-3.54943	-5.03677	-6.30233	-9.42442	3.01	0.0740519	S580,S581,S593
K.FSHQDS(phos)VEPK.N	Q7KUD6	BcDNA:RE59468	Anion exchange protein OS=Drosophila melanogaster OX=7227 GN=BcDNA:RE59468 PE=1 SV=1	-3.53475	-3.54021	-4.79246	-5.6594	-5.92692	-10.0422	-4.26114	-9.30734	3	0.0586104	S142
K.VIDVPDEAADDDDEDVDDDEEES(phos)AEDGAAKKEEK.K	Q9I7K6	CG8223	Protein NASP homolog OS=Drosophila melanogaster OX=7227 GN=CG8223 PE=1 SV=1	-6.91549	-6.70087	-6.75735	-6.58502	-10.3213	-10.8537	-8.12536	-9.67432	3	0.000897766	S144
D.DS(phos)DEEEVVPAK.G	M9ND37	eIF5B	Eukaryotic translation initiation factor 5B isoform E OS=Drosophila melanogaster OX=7227 GN=eIF5B PE=1 SV=1	-5.04699	-4.30115	-4.8674	-4.66229	-10.4143	-10.2613	-5.18687	-5.01438	3	0.0660009	S77
K.TAAT(phos)PPAVR.R	A0A126GV13	spas	Spastin OS=Drosophila melanogaster OX=7227 GN=spas PE=3 SV=1	-3.36575	-3.69524	-3.6452	-3.957	-9.5428	-9.64823	-3.86592	-3.61111	3	0.0917979	T150
R.S(phos)IEASVGSAYENVK.T	A1ZB78	BcDNA:RH27395	Uncharacterized protein isoform G OS=Drosophila melanogaster OX=7227 GN=BcDNA:RH27395 PE=1 SV=1	-1.86899	0.834401	-0.96309	-0.568687	-0.645458	-2.06186	-1.37609	-10.4669	3	0.204481	S141
R.KTEKYES(phos)DS(phos)EEEPGASGK.S	Q7K0X3	Ctr9	Ctr9 isoform A OS=Drosophila melanogaster OX=7227 GN=Ctr9 PE=1 SV=1	-5.73053	-4.00925	-6.52404	-5.94381	-9.66033	-6.69861	-6.8425	-10.9585	2.99	0.0273688	S955,S957
R.SES(phos)EPGM(ox)PSMVEK.G	Q9VED0	CG7218	Protein TAPT1 homolog OS=Drosophila melanogaster OX=7227 GN=CG7218 PE=2 SV=2	-2.75549	-3.51177	-4.62627	-4.43908	-9.206	-3.32972	-10.5677	-4.13045	2.98	0.12052	S652
R.TT(phos)SVADTVT(phos)PVVSDDEGQEPQSELNQR.H	A1Z9S6	Su(var)2-HP2	Su(Var)2-HP2 isoform A OS=Drosophila melanogaster OX=7227 GN=Su(var)2-HP2 PE=1 SV=1	-5.57178	-2.68669	-5.91888	-1.74758	-3.25768	-10.7722	-3.80171	-9.96889	2.97	0.187053	T273,T280
R.NRDNEDLESIAS(phos)S(phos)NQSK.Q	Q9VYW4	Dmel\CG1703	LD04461p OS=Drosophila melanogaster OX=7227 GN=Dmel\CG1703 PE=1 SV=1	-7.6816	-4.85232	-5.16263	-5.25012	-10.101	-8.41774	-8.77841	-7.48686	2.96	0.00642566	S67,S68
K.FPSIEYEGAHN(d)LEPESPINHSGS(phos)PTPR.N	M9PCQ6	Dlg5	Discs large 5 isoform C OS=Drosophila melanogaster OX=7227 GN=Dlg5 PE=1 SV=1	-3.60385	-4.05438	-2.99936	-3.70755	-10.4211	-2.97952	-9.42567	-3.32438	2.95	0.144404	S1398
R.S(phos)IEASVGSAYENVK.T	Q7JRI6	BcDNA:RH27395	RE18604p OS=Drosophila melanogaster OX=7227 GN=BcDNA:RH27395 PE=1 SV=1	-1.86899	0.834401	-0.96309	-0.568687	-0.645458	-2.06186	-1.37609	-10.2669	2.95	0.203002	S141
K.SGGDGSSGGGSS(phos)PALTAAEK.H	Q9VUB5	upSET	UpSET isoform A OS=Drosophila melanogaster OX=7227 GN=upSET PE=1 SV=3	-4.45899	-3.6581	-3.25502	-3.03533	-10.4896	-2.38318	-3.11627	-10.1891	2.94	0.186861	S1042
R.TQRQS(phos)PAGQPLPPGGSAVPK.A	Q8IN55	CG15684	Oxysterol-binding protein OS=Drosophila melanogaster OX=7227 GN=CG15684 PE=1 SV=1	-1.87508	-1.40817	-2.73919	-3.08214	-10.0854	-3.06973	-5.18687	-2.53003	2.94	0.108216	S499
V.TN(d)T(phos)KFSN(d)PK.V	Q8MSB1	CG13638	LD35157p OS=Drosophila melanogaster OX=7227 GN=CG13638 PE=1 SV=1	-3.42885	-3.58482	-3.49433	-5.77583	-4.24768	-7.64407	-9.83635	-6.27124	2.93	0.0425569	T382
R.SHS(phos)IPNGVLASELEPLNNNK.H	A8JR87	Irk1	FI16807p1 OS=Drosophila melanogaster OX=7227 GN=Irk1 PE=1 SV=1	0.617301	1.71946	-0.125043	0.465784	0.944973	0.521063	-6.41085	-4.06061	2.92	0.12191	S434
R.N(d)GENGSTSGTPHHAQESMQ(d)LGNIS(phos)PQSGITFYSPAR.L	A0A0B4KH10	Stat92E	Signal transducer and activator of transcription OS=Drosophila melanogaster OX=7227 GN=Stat92E PE=3 SV=1	-2.28113	-4.00691	-3.04982	-5.51228	-9.99439	-3.94046	-2.20266	-10.3966	2.92	0.186633	S621
R.SMAISHSDAESLLGPQS(phos)PNPEESTESEAVETSK.Q	Q6A1Q0	Cap-G	CAP-G protein OS=Drosophila melanogaster OX=7227 GN=Cap-G PE=4 SV=1	2.4382	1.33803	1.69364	3.47307	3.09979	0.66009	2.2857	-8.76931	2.92	0.285657	S1051
K.YTIS(phos)DDDDDDM(ox)D.X	M9PFS6	brm	Brahma isoform E OS=Drosophila melanogaster OX=7227 GN=brm PE=4 SV=1	-7.7373	-6.09932	-6.71928	-6.83028	-9.93749	-9.40983	-9.34713	-10.3162	2.91	0.00012938	S1631
R.LS(phos)PSTVDEVK.K	Q9V4F9	MED26	Mediator of RNA polymerase II transcription subunit 26 OS=Drosophila melanogaster OX=7227 GN=MED26 PE=1 SV=2	-0.637722	1.21204	1.30557	0.745087	1.82704	-0.293516	-0.343121	-10.2098	2.91	0.278945	S374
K.LPS(phos)NSDLSAPR.E	X2J516	Gart	Trifunctional purine biosynthetic protein adenosine-3 OS=Drosophila melanogaster OX=7227 GN=Gart PE=1 SV=1	-4.32627	-4.05679	-3.83126	-3.71647	-9.39242	-4.7515	-4.26878	-9.16565	2.91	0.0537961	S815
K.YVPQ(d)QQAS(phos)PNHR.V	Q7K4C7	Pcyt1	LD46058p OS=Drosophila melanogaster OX=7227 GN=Pcyt1 PE=1 SV=1	-2.71125	-2.33935	-5.86368	-2.75695	-6.56398	-3.41914	-7.07633	-8.22133	2.9	0.0451095	S144
K.YTIS(phos)DDDDDDM(ox)D	P25439	brm	ATP-dependent helicase brm OS=Drosophila melanogaster OX=7227 GN=brm PE=1 SV=2	-7.7373	-6.09932	-6.71928	-6.83028	-9.83831	-10.4707	-8.842	-9.78196	2.89	0.000324294	S1631
K.E(ac)FQ(d)DVSTDGS(phos)PKK.D	B8A408	hts-RF	MIP03122p (Fragment) OS=Drosophila melanogaster OX=7227 GN=hts-RF PE=2 SV=1	-1.74673	-2.43821	-1.69526	-2.05902	-3.32077	-3.94615	-9.87432	-2.37238	2.89	0.103338	S218
K.VEPPPPAPPGVES(phos)PPGPQPPAS(phos)PR.F	Q9VAY4	BOD1	Biorientation defective 1 isoform A OS=Drosophila melanogaster OX=7227 GN=BOD1 PE=1 SV=2	4.82602	2.04919	1.83504	1.89434	4.0839	0.903438	4.24842	-10.1317	2.88	0.390882	S381,S390
R.MNTLFGGPDTPS(phos)GDIPPLPQDPDQIMAGFK.K	Q8IP97	Pex19	Peroxin 19 isoform A OS=Drosophila melanogaster OX=7227 GN=Pex19 PE=1 SV=2	-4.70144	-1.74532	-8.90424	-6.85569	-9.4753	-7.80833	-8.17426	-8.28738	2.88	0.0828674	S78
K.NAS(phos)ILLEELDLER.T	A0A0B4LHK4	mask	Multiple ankyrin repeats single KH domain isoform F OS=Drosophila melanogaster OX=7227 GN=mask PE=4 SV=1	-4.48483	-4.23676	-4.47727	-4.95259	-4.22505	-8.60652	-9.28958	-7.48041	2.86	0.027044	S2310
R.HDS(phos)NTLESQR.S	E8NH23	cenB1A-RB	SD22850p OS=Drosophila melanogaster OX=7227 GN=cenB1A-RB PE=2 SV=1	-3.80074	-4.096	-3.11548	-4.20443	-3.66271	-3.44574	-9.92856	-9.61732	2.86	0.125519	S585
R.SMAISHSDAESLLGPQS(phos)PNPEESTESEAVETSK.Q	A1Z987	Cap-G	Chromosome associated protein G isoform F OS=Drosophila melanogaster OX=7227 GN=Cap-G PE=1 SV=2	1.93678	1.64247	1.46005	1.90802	1.57836	1.61235	1.58638	-9.17469	2.84	0.283608	S1051
R.QNS(phos)LDSSSSASQGAPK.K	E1JJN9	Set2	SET domain containing 2 isoform B OS=Drosophila melanogaster OX=7227 GN=Set2 PE=4 SV=1	0.936964	4.72666	6.28361	5.8798	0.573577	-0.129555	2.93177	3.08702	2.84	0.070177	S1090
R.SPS(phos)LGVDR.T	Q9VIT3	msb1l	LD32040p OS=Drosophila melanogaster OX=7227 GN=msb1l PE=1 SV=2	-4.20473	-2.74392	-2.24457	-2.74548	-10.2858	-3.45923	-6.2014	-3.32438	2.83	0.105934	S219
R.QEEEQILAVESVPEALVTS(phos)IN(d)VEEK.S	M9PE93	ens	Ensconsin isoform K OS=Drosophila melanogaster OX=7227 GN=ens PE=1 SV=1	-3.40046	-4.74717	-8.68422	-5.48153	-8.56991	-6.34816	-9.80521	-8.91765	2.83	0.0526913	S625
K.S(phos)QDELASK.G	Q7K1L4	Dmel\CG8468	SD10469p OS=Drosophila melanogaster OX=7227 GN=Dmel\CG8468 PE=1 SV=1	-2.7443	-2.83425	-2.80267	-3.79228	-10.4511	-4.59147	-4.17248	-4.21497	2.81	0.0860346	S9
K.QYGWQC(cam)S(phos)EC(cam)C(cam)DKSEGSDAVTEISSGPR.K	Q8T096	CG15439	LD18949p OS=Drosophila melanogaster OX=7227 GN=CG15439 PE=2 SV=1	-0.653335	-1.0942	-0.942089	-1.39888	-1.72633	-10.4749	-2.64934	-0.425503	2.8	0.21635	S405
K.EFSS(phos)HLS(phos)LR.S	Q7JWI7	Dmel\CG11665	RE60337p OS=Drosophila melanogaster OX=7227 GN=Dmel\CG11665 PE=1 SV=1	-3.87689	-4.00691	-4.11571	-4.42438	-8.49887	-4.99689	-4.1893	-9.92961	2.8	0.0605637	S405,S408
K.QAEAAAALLAASTTPQHHHVAEDENENEEELTNGDAGGDVS(phos)R.D	M9PHG2	Moe	Moesin isoform M OS=Drosophila melanogaster OX=7227 GN=Moe PE=1 SV=1	0.628104	0.0679723	0.650039	0.120671	0.413765	-0.342662	-9.24636	-0.555465	2.8	0.218838	S500
R.EMS(phos)S(phos)VER.A	A0A0B4KGP6	Fmr1	Fmr1 isoform H OS=Drosophila melanogaster OX=7227 GN=Fmr1 PE=1 SV=1	0.0118258	-0.69576	-0.230219	-0.852388	-10.2653	-1.20072	-0.825459	-0.67126	2.8	0.230818	S495,S496
K.KPSQM(ox)QAIQS(phos)PPSSSSR.D	Q9VEJ1	SF1	LD36095p OS=Drosophila melanogaster OX=7227 GN=SF1 PE=1 SV=3	-5.41452	-5.06434	-7.00761	-7.06998	-10.3585	-11.0013	-7.44042	-6.90135	2.79	0.032394	S630
R.SSGGT(phos)AGNSPDNEDDDGGAAGEEEPINMADLLPR.V	Q9U5W6	msps	Microtubule associated protein OS=Drosophila melanogaster OX=7227 GN=msps PE=4 SV=1	-3.98337	-5.07899	-3.86023	-3.18212	-3.74685	-4.00625	-9.78894	-9.71837	2.79	0.12083	T825
R.SS(phos)LTPASSSAGVK.R	Q86B87	mod(mdg4)	Modifier of mdg4 OS=Drosophila melanogaster OX=7227 GN=mod(mdg4) PE=1 SV=1	-5.49476	-3.65993	-3.34037	-4.15204	-4.28816	-9.48552	-10.1029	-3.88522	2.78	0.118213	S231
R.ADS(phos)VKSAT(phos)PEPVDTESRR.I	Q9Y0Y6	Madm	Nuclear receptor-binding protein homolog OS=Drosophila melanogaster OX=7227 GN=Madm PE=1 SV=1	-2.93466	-3.34164	-3.32631	-2.28927	-10.3507	-4.93528	-4.28676	-3.42406	2.78	0.0945382	S480,T485
R.KPFNS(phos)GEQLR.T	A1Z920	fra	FI24025p1 OS=Drosophila melanogaster OX=7227 GN=fra PE=1 SV=1	-4.0019	-3.99528	-4.18734	-3.9623	-9.6113	-4.03222	-10.3499	-3.23116	2.77	0.142141	S466
K.IHVRPPSGEENES(phos)PDEEAVVAI	Q9VZ61	sofe	Sister of feo isoform A OS=Drosophila melanogaster OX=7227 GN=sofe PE=4 SV=2	-1.99594	-2.27467	-3.54771	-3.69206	-3.79812	-4.33874	-9.61196	-4.8494	2.77	0.0663365	S599
K.DKSSEQYNPGS(phos)PTSESNDAQPSEKK.L	Q7KRW8	CG1646	Pre-mRNA-processing factor 39 OS=Drosophila melanogaster OX=7227 GN=CG1646 PE=1 SV=1	-6.95416	-5.54416	-7.61951	-6.54473	-10.2307	-7.38739	-9.56863	-10.5122	2.76	0.0081744	S309
F.ISGANIET(phos)YLLEK.S	Q59E58	zip	Zipper isoform C OS=Drosophila melanogaster OX=7227 GN=zip PE=1 SV=1	0.606416	0.212852	0.78211	0.606605	-0.890527	-7.27246	-0.630352	-0.0484228	2.76	0.116363	T270
K.LRDQNPGQS(phos)PTGGASGPGEQGDENESYEK.A	Q9VG62	trus	Toys are us OS=Drosophila melanogaster OX=7227 GN=trus PE=4 SV=1	0.00355286	-1.11922	-0.486221	-0.771697	-10.8178	-0.198566	0.582223	-2.94544	2.75	0.283722	S356
R.VADGDDDIKS(phos)LKS(phos)EDET(phos)DEDHVQDHK.H	O46093	mip130	EG:86E4.4 protein OS=Drosophila melanogaster OX=7227 GN=mip130 PE=4 SV=1	-3.25046	0.767725	0.903097	0.833722	-0.092543	-0.596516	-1.72877	-9.27915	2.74	0.24448	S657,S660,T664
K.KVST(phos)SPDAAEAAGDPVEQSVWAQK.L	Q961T2	Fbl6	SD01170p OS=Drosophila melanogaster OX=7227 GN=Fbl6 PE=2 SV=1	-4.30968	-1.31851	-2.78119	-2.39276	-1.26307	-10.134	-8.93978	-1.39699	2.73	0.260253	T273
K.YTQQVNYDS(phos)ADELDATFGQQK.Q	A0A0B4KEE4	koi	Klaroid isoform A OS=Drosophila melanogaster OX=7227 GN=koi PE=1 SV=1	-5.72172	-4.333	-4.07334	-5.14398	-10.1712	-10.123	-4.67279	-5.18751	2.72	0.0952691	S236
R.ATAQQPQQEPQQQS(phos)LAGGK.T	Q7JQL5	Atg9	Autophagy-related protein 9 OS=Drosophila melanogaster OX=7227 GN=Atg9 PE=1 SV=1	-4.48856	-3.5796	-4.28067	-5.13797	-10.3101	-4.21004	-6.55287	-7.30103	2.72	0.0541746	S605
R.IAELT(phos)DPAEQSK.C	A1Z814	Dmel\CG1513	Oxysterol-binding protein OS=Drosophila melanogaster OX=7227 GN=Dmel\CG1513 PE=1 SV=2	-6.05612	-5.39005	-5.85468	-5.21176	-10.5422	-6.09983	-10.6978	-6.03227	2.71	0.0591732	T189
K.S(phos)PTNPNSGIGATGAGNR.S	G7H807	InR-RC	Receptor protein-tyrosine kinase (Fragment) OS=Drosophila melanogaster OX=7227 GN=InR-RC PE=2 SV=1	-4.32294	-3.88175	-4.18734	-4.07255	-4.47913	-3.51447	-10.234	-9.05006	2.7	0.115955	S839
D.LGFGQS(phos)DDEDDVGPR.A	P49735	Mcm2	DNA replication licensing factor Mcm2 OS=Drosophila melanogaster OX=7227 GN=Mcm2 PE=1 SV=1	-8.44162	-7.56971	-7.46911	-6.92227	-10.1789	-10.2207	-10.5874	-10.1475	2.68	6.68e-05	S125
K.TEFNSGS(phos)PSTTASGSVK.G	Q9W0X5	Dmel\CG2765	MIP21584p OS=Drosophila melanogaster OX=7227 GN=Dmel\CG2765 PE=2 SV=2	-0.864247	-2.09021	-2.44102	-2.67856	-10.7332	-3.26908	-3.09348	-1.69472	2.68	0.198816	S128
K.TPAS(phos)PLEVMIK.L	Q9VHM5	Dmel\CG8159	RT10616p OS=Drosophila melanogaster OX=7227 GN=Dmel\CG8159 PE=2 SV=2	-3.71742	-5.2019	-4.1265	-4.7375	-11.0166	-4.17401	-9.38096	-3.89591	2.67	0.153611	S114
R.S(phos)INSDDKSNAMTPLENR.A	Q7JW01	Dmel\CG15107	LD14312p OS=Drosophila melanogaster OX=7227 GN=Dmel\CG15107 PE=2 SV=1	-4.02068	-2.87628	-2.77058	-6.13395	-11.3045	-2.25416	-4.28676	-8.61617	2.67	0.222207	S80
K.ASQVST(phos)ATSSPQASR.N	Q95SC6	Cip4	GM03419p OS=Drosophila melanogaster OX=7227 GN=Cip4 PE=2 SV=1	6.63837	1.21204	6.3928	17.3544	5.85926	3.92604	4.59932	6.51778	2.67	0.419893	T51
K.HTPAVTIRPQNQS(phos)PYK.K	A1Z920	fra	FI24025p1 OS=Drosophila melanogaster OX=7227 GN=fra PE=1 SV=1	-6.64028	-6.19184	-5.79321	-6.79961	-8.83897	-11.1773	-9.97111	-6.09661	2.66	0.0331576	S1463
R.NQTFTPGQLNS(phos)QSSLYAVPEGR.S	Q7JWI7	Dmel\CG11665	RE60337p OS=Drosophila melanogaster OX=7227 GN=Dmel\CG11665 PE=1 SV=1	-2.8603	-3.08226	-3.24911	-2.6677	-3.7651	-4.58258	-9.41617	-4.73617	2.66	0.0569815	S347
R.EMS(phos)S(phos)VER.A	B3LF78	Fmr1	Fmr1 isoform F OS=Drosophila melanogaster OX=7227 GN=Fmr1 PE=1 SV=1	0.0118258	-0.69576	-0.230219	-0.852388	-9.70148	-1.20072	-0.825459	-0.67126	2.66	0.226823	S495,S496
R.QGS(phos)PGVSSLPQIR.A	P49847	Taf6	Transcription initiation factor TFIID subunit 6 OS=Drosophila melanogaster OX=7227 GN=Taf6 PE=1 SV=2	-4.27706	-4.81096	-3.62977	-6.45388	-5.31182	-5.95523	-9.93815	-8.55809	2.65	0.0516336	S506
K.NNEVAGES(phos)PTDQQESEATLNDLDK.T	Q95R81	fmt	SD02803p OS=Drosophila melanogaster OX=7227 GN=fmt PE=2 SV=1	-5.37948	-4.6749	-4.29277	-4.34267	-7.59274	-7.0835	-9.9409	-4.65521	2.65	0.0345109	S546
R.RQEVASHS(phos)DSDSVPR.K	Q9VNE0	Dmel\CG2926	Uncharacterized protein isoform A OS=Drosophila melanogaster OX=7227 GN=Dmel\CG2926 PE=1 SV=1	-3.88179	-3.04582	-4.59222	-4.12209	-5.18084	-10.2435	-4.90308	-5.93348	2.65	0.0571992	S71
R.RS(phos)S(phos)ERELADSGAK.K	M9PE93	ens	Ensconsin isoform K OS=Drosophila melanogaster OX=7227 GN=ens PE=1 SV=1	-5.63651	-3.83333	-4.81847	-4.83617	-6.18632	-10.8339	-5.72437	-6.90279	2.63	0.0496846	S181,S182
R.STRPS(phos)DS(phos)SIEN(d)ESFVLTYSQR.F	Q9VZZ9	dos	Protein daughter of sevenless OS=Drosophila melanogaster OX=7227 GN=dos PE=1 SV=1	2.0931	-6.13971	-10.2918	-4.67094	-8.02924	-6.22325	-6.60349	-8.65776	2.63	0.308505	S431,S433
R.ELS(phos)MDESTPK.R	M9PHK2	Tao	Tao isoform I OS=Drosophila melanogaster OX=7227 GN=Tao PE=1 SV=1	-5.26632	-5.93926	-5.10814	-5.15001	-9.46836	-5.71628	-10.5379	-6.28056	2.63	0.0459313	S682
R.SLT(phos)EEATKDGDEVASSTR.R	X2JAM4	Svil	Supervillin isoform AE OS=Drosophila melanogaster OX=7227 GN=Svil PE=1 SV=1	1.30331	-1.60176	-3.62402	-3.04935	-5.09626	-0.772631	-10.049	-1.56105	2.63	0.26358	T2350
R.GS(phos)SSEDYDSGEMISNK.L	H6WS59	Patronin	Patronin (Fragment) OS=Drosophila melanogaster OX=7227 GN=Patronin PE=2 SV=1	-5.99119	-5.77121	-4.88104	-6.39395	-6.58832	-5.19024	-11.1898	-10.5376	2.62	0.0967188	S1089
R.HFT(phos)PPSDS(phos)DSKESS(phos)VER.E	Q9VY91	Pdcd4	LD21074p OS=Drosophila melanogaster OX=7227 GN=Pdcd4 PE=1 SV=2	-7.87891	-7.23617	-6.77252	-7.00076	-8.98316	-10.2134	-9.70341	-10.4737	2.62	0.000242305	T19,S24,S30
K.PM(ox)VVEDEES(phos)T	Q24034	Mybbp1A	Lethal(1)1Bi protein OS=Drosophila melanogaster OX=7227 GN=Mybbp1A PE=4 SV=1	-5.36569	-5.10875	-5.54143	-5.32321	-6.38523	-5.98614	-10.0184	-9.34	2.6	0.0270045	S1133
R.YHRPTPTASNDS(phos)DDEISHLEWETVR.V	Q9U4U5	Rgl	LD16082p OS=Drosophila melanogaster OX=7227 GN=Rgl PE=2 SV=1	-3.42885	-4.64916	-2.97478	-3.12012	-9.59888	-2.55353	-9.55461	-2.87321	2.6	0.19824	S226
K.S(phos)PVSYPPQQQQQSPR.P	A0A126GUN6	Zasp52	Z band alternatively spliced PDZ-motif protein 52 isoform X OS=Drosophila melanogaster OX=7227 GN=Zasp52 PE=1 SV=1	1.89266	-3.85418	-1.22046	3.25146	1.41348	-2.53914	-4.89124	-4.29528	2.6	0.222095	S466
K.KES(phos)S(phos)EEDDDVDDKDES(phos)DEDEPLTKK.G	A1ZAK4	Dek	Dek isoform A OS=Drosophila melanogaster OX=7227 GN=Dek PE=1 SV=1	-6.18331	-2.66811	-2.47509	-2.41075	-3.93146	-5.01669	-6.77857	-8.3645	2.59	0.070892	S580,S581,S593
K.TETQ(d)LDISVMEVDS(phos)S(phos)DHDEEEKTEK.V	Q8INM3	sle	Protein slender lobes OS=Drosophila melanogaster OX=7227 GN=sle PE=1 SV=1	-9.09634	-4.77871	-4.79676	-7.64048	-8.73916	-7.90246	-10.4412	-9.57459	2.59	0.0502322	S834,S835
R.NTSSSGGGGASALQT(phos)PENVSVPR.T	A0A0B4LFA6	Rpn13	Regulatory particle non-ATPase 13 isoform G OS=Drosophila melanogaster OX=7227 GN=Rpn13 PE=1 SV=1	-2.58611	-2.48622	-2.95061	-2.98055	-3.12083	-3.36737	-5.01427	-9.85147	2.59	0.111557	T197
K.ENATT(phos)PPQQQQPPLSQTLN(d)NNNDNVK.T	A0A0B4K7Y7	larp	La related protein isoform G OS=Drosophila melanogaster OX=7227 GN=larp PE=1 SV=1	-4.89572	-5.35397	-5.2662	-5.2962	-9.76542	-5.72277	-5.60351	-10.0836	2.59	0.0543801	T983
R.GS(phos)FAGSHFMVQLPDGTIER.K	Q9W0L6	Dmel\CG13907	GH22266p OS=Drosophila melanogaster OX=7227 GN=Dmel\CG13907 PE=1 SV=1	-7.28932	-6.33691	-5.75923	-6.44051	-10.7021	-10.1442	-7.1686	-8.11422	2.58	0.015637	S284
R.LQRFS(phos)EDASNKR.Q	Q9VXU6	mh	Maternal haploid OS=Drosophila melanogaster OX=7227 GN=mh PE=1 SV=1	0.0604915	-0.41066	-0.688708	-0.91521	-9.47024	-1.53369	-2.15468	0.867891	2.58	0.243925	S432
M(ac)DIS(phos)GGNTSR.Q	P46863	Klp61F	Kinesin-like protein Klp61F OS=Drosophila melanogaster OX=7227 GN=Klp61F PE=1 SV=2	-2.28924	-2.31024	-2.42428	-2.45674	-10.8988	-3.17707	-2.97418	-2.70705	2.57	0.19748	S5
K.IVIEDS(phos)DDDAN(d)HS(phos)DVDPSADSSPR.K	Q9VX35	CC4	LD36501p OS=Drosophila melanogaster OX=7227 GN=CC4 PE=1 SV=1	-6.39098	-5.99375	-6.83841	-5.98635	-9.37973	-6.81447	-9.96176	-9.29333	2.56	0.00628567	S101,S108
R.GLGLC(cam)SLLASS(phos)QESLPSASSASVISDPREDDEEREER.T	Q9VZ60	Dmel\CG2186	Uncharacterized protein isoform A OS=Drosophila melanogaster OX=7227 GN=Dmel\CG2186 PE=1 SV=1	-1.14407	-2.99863	-2.67838	-2.57349	-2.4534	-10.0687	-3.22354	-3.87637	2.56	0.160012	S200
R.S(phos)QPDLM(ox)LLN(d)NSGDGVTSAK.A	Q9VED0	CG7218	Protein TAPT1 homolog OS=Drosophila melanogaster OX=7227 GN=CG7218 PE=2 SV=2	-3.79611	-4.85232	-5.66971	-5.33004	-5.69154	-10.1386	-3.95967	-10.0913	2.56	0.12523	S616
K.RNAS(phos)LER.H	Q9VM04	Ziz	Zizimin isoform C OS=Drosophila melanogaster OX=7227 GN=Ziz PE=1 SV=5	-3.91905	-5.04024	-4.77114	-4.7743	-10.1278	-4.56498	-4.00149	-10.0075	2.55	0.14066	S406
K.SAVSS(phos)PEQ(d)LPSPTSPIAAEIGDKPYGR.G	Q29R25	CG6718	RE23733p OS=Drosophila melanogaster OX=7227 GN=CG6718 PE=2 SV=1	-0.87336	-2.4461	-3.44116	-3.58808	-1.87256	-4.59147	-8.16283	-5.94084	2.55	0.094477	S539
K.SQPT(phos)TPN(d)GDPQQLTFNLHK.E	Q7K1L4	Dmel\CG8468	SD10469p OS=Drosophila melanogaster OX=7227 GN=Dmel\CG8468 PE=1 SV=1	-2.67893	-6.4956	-3.23153	-4.15811	-4.38832	-3.31739	-9.77073	-9.2854	2.55	0.174054	T333
R.SLT(phos)PSKTS(phos)PR.G	P46863	Klp61F	Kinesin-like protein Klp61F OS=Drosophila melanogaster OX=7227 GN=Klp61F PE=1 SV=2	-2.06387	-2.70552	-2.3592	-2.94079	-10.9765	-2.97952	-3.13943	-3.14359	2.54	0.200205	T1046,S1051
K.TAT(phos)PPKDEANAEQNGGEPAANSGDK.M	Q9VUC1	Hsc70Cb	Hsc70Cb isoform A OS=Drosophila melanogaster OX=7227 GN=Hsc70Cb PE=1 SV=1	1.02134	1.01053	0.146873	0.336929	0.391054	0.386173	-8.47261	0.0360511	2.54	0.242893	T763
K.RNNS(phos)QQSTGTVASTGTTPSK.E	Q9VHC8	Dmel\CG8149	LD31448p OS=Drosophila melanogaster OX=7227 GN=Dmel\CG8149 PE=1 SV=1	-3.79842	-4.08609	-4.32038	-4.27519	-5.4825	-5.89534	-10.2389	-4.99127	2.53	0.055548	S123
R.QFQS(phos)QHSTQETPTTSTTLPAK.L	H0RNJ0	NC2alpha-RA	FI17839p1 (Fragment) OS=Drosophila melanogaster OX=7227 GN=NC2alpha-RA PE=2 SV=1	0.20603	-0.297455	-0.659031	0.415615	-0.638432	-4.31647	-3.57168	-1.94471	2.53	0.0143875	S188
K.N(d)GGKS(phos)DS(phos)DDDEPVAK.K	Q9VJI6	BuGZ	Bub3 interacting GLEBS and zinc finger domain protein isoform A OS=Drosophila melanogaster OX=7227 GN=BuGZ PE=1 SV=2	5.54527	2.47199	3.94167	3.17624	-0.603805	-1.27034	5.00613	1.957	2.51	0.121482	S103,S105
K.KAS(phos)PVNC(cam)NLC(cam)R.T	Q8MSE4	PIG-P	GM30016p2 OS=Drosophila melanogaster OX=7227 GN=PIG-P PE=2 SV=1	-3.9755	-2.4461	-3.5459	-3.61703	-9.97899	-3.87032	-6.10708	-3.68801	2.51	0.107191	S123
R.IVSQVIVAVNKPPEPS(phos)DDEDM(ox)AEKPVNSVIK.V	Q500Y6		SD07352p OS=Drosophila melanogaster OX=7227 PE=2 SV=1	-1.88734	-3.29385	-2.25193	-2.43817	-9.95014	-2.91306	-2.31681	-4.73617	2.51	0.159898	S417
R.RHS(phos)FTPPS(phos)NENSR.S	Q9VAN6	Slbp	Histone RNA hairpin-binding protein OS=Drosophila melanogaster OX=7227 GN=Slbp PE=1 SV=1	-5.83111	-4.63466	-4.86288	-5.15607	-9.43826	-9.51297	-5.4625	-6.06408	2.5	0.0423891	S119,S124
K.FESS(phos)PVEQLPNFDFSVR.G	M9PDR8	CdGAPr	Cd GTPase activating protein-related isoform D OS=Drosophila melanogaster OX=7227 GN=CdGAPr PE=1 SV=1	-4.6338	-5.15975	-2.27426	-2.96718	-7.39791	-4.43672	-1.92104	-11.2681	2.5	0.235814	S1487
K.TSHVDLSVSTTNGNS(phos)PAKSEK.R	Q8IRH5	CG2199	Zinc finger protein CG2199 OS=Drosophila melanogaster OX=7227 GN=CG2199 PE=1 SV=1	-3.75062	-4.28691	-4.77114	-4.34959	-4.58682	-3.45923	-9.99039	-9.13691	2.5	0.136093	S601
K.C(cam)SS(phos)PSALKEELKR.L	Q8IPK8	Bsg25D	Blastoderm-specific gene 25D isoform C OS=Drosophila melanogaster OX=7227 GN=Bsg25D PE=4 SV=1	-0.540161	-1.84094	-1.87124	-1.36341	-9.12643	-2.78867	-0.0519659	-3.64679	2.5	0.19592	S862
M(ox)(ac)NDS(phos)FGDFNATQTAPTGAASNQK.G	Q8SXG3	RPA2	RH07841p OS=Drosophila melanogaster OX=7227 GN=RPA2 PE=2 SV=1	-1.54881	-0.889316	-1.73084	-1.38104	-9.32176	-1.79069	-2.18448	-2.15341	2.48	0.179832	S5
R.RTSKGS(phos)LS(phos)PSYK.R	X2JE07	Dmel\CG1677	Uncharacterized protein isoform D OS=Drosophila melanogaster OX=7227 GN=Dmel\CG1677 PE=1 SV=1	-2.93466	-2.81368	-3.5297	-4.15507	-9.84369	-5.47252	-3.10483	-4.93872	2.48	0.103401	S804,S806
K.DALQIIGDVS(phos)MATVSSPLPPPVK.N	F6J774	CG18102	CG18102 (Fragment) OS=Drosophila melanogaster OX=7227 GN=CG18102 PE=4 SV=1	-3.44144	-8.34323	-3.51367	-8.0014	-8.17779	-8.61616	-8.22488	-8.21061	2.48	0.0845234	S88
K.IGQLSTITAQES(phos)SESQAAR.V	A0A0B4LGI9	anon-EST:fe2C9	Uncharacterized protein isoform D OS=Drosophila melanogaster OX=7227 GN=anon-EST:fe2C9 PE=1 SV=1	-3.40398	-2.59609	-3.07572	-2.79189	-9.74625	-3.62564	-3.29975	-5.08605	2.47	0.111748	S105
R.HDS(phos)EVEN(d)WDRDLELER.N	Q9VRM6	l(3)psg2	Lethal (3) persistent salivary gland 2 OS=Drosophila melanogaster OX=7227 GN=l(3)psg2 PE=4 SV=2	-2.07084	0.389543	0.0795173	0.617742	-11.0437	0.347966	0.23364	-0.401493	2.47	0.370907	S818
K.DHELSSGSNSDNC(cam)NHKPTPT(phos)PPAT(phos)PTK.A	Q7JQI1	DUBAI	Deubiquitinating apoptotic inhibitor isoform A OS=Drosophila melanogaster OX=7227 GN=DUBAI PE=2 SV=1	1.43218	0.633739	-1.20609	-2.08046	-10.5249	-0.688822	-2.60837	2.73475	2.47	0.383368	T514,T518
R.NQLVHSEQNS(phos)LK.I	M9PCA7	Ncc69	Sodium chloride cotransporter 69 isoform C OS=Drosophila melanogaster OX=7227 GN=Ncc69 PE=1 SV=1	-4.62556	0.66155	-0.160989	0.15777	-4.60497	0.128873	0.116341	-9.45008	2.46	0.330556	S918
R.AAAAAPLIIPLLST(phos)SC(cam)S(phos)EEEVEEIDKEEQQRR.L	C5I7D5	CG6227	Uncharacterized protein OS=Drosophila melanogaster OX=7227 GN=CG6227 PE=4 SV=1	-0.888677	-0.805702	-1.05996	-0.604477	-3.57961	-3.91794	-0.809121	-4.88802	2.46	0.0181756	T172,S175
R.QQS(phos)MLER.G	A0A0B4K6Y7	pyd	Polychaetoid isoform O OS=Drosophila melanogaster OX=7227 GN=pyd PE=1 SV=1	-4.81859	-3.76066	-3.93888	-4.00813	-7.169	-7.28202	-6.46834	-5.40449	2.45	0.00105286	S1736
R.S(phos)PS(phos)QIPR.R	X2JE07	Dmel\CG1677	Uncharacterized protein isoform D OS=Drosophila melanogaster OX=7227 GN=Dmel\CG1677 PE=1 SV=1	-1.80948	-1.49148	-1.43422	-1.87917	-2.84804	-9.27678	-2.3913	-1.90366	2.45	0.164103	S789,S791
K.HDQT(phos)PQ(d)DDDEDREEGELHPLVTITK.I	Q9VAW1	Moca-cyp	Moca-cyp isoform A OS=Drosophila melanogaster OX=7227 GN=Moca-cyp PE=1 SV=1	-3.06781	-2.02966	-1.72058	-1.53532	-1.80282	-1.68392	-7.07276	-7.5896	2.45	0.146485	T251
R.KVVISDPIQMPEVYSSTPGGTLYST(phos)T(phos)PGGTK.L	Q9XZ56	Thor	4E-binding protein THOR OS=Drosophila melanogaster OX=7227 GN=Thor PE=1 SV=1	-1.88734	-2.36157	-1.64592	-2.03789	-2.38909	-2.44222	-2.67449	-10.2295	2.45	0.206161	T46,T47
R.SRPS(phos)PSDS(phos)PMSR.N	Q0KHR5	RhoGAP15B	Rho GTPase activating protein at 15B isoform B OS=Drosophila melanogaster OX=7227 GN=RhoGAP15B PE=1 SV=1	-6.72572	-6.12951	-6.10908	-6.64169	-10.9645	-9.10654	-8.18194	-7.12297	2.44	0.0146255	S364,S368
K.ESS(phos)GNMASPGKM(ox)DGN(d)PLSEIEEIVK.T	Q7YZA0	trio	Trio isoform B OS=Drosophila melanogaster OX=7227 GN=trio PE=1 SV=1	-2.10621	-3.45811	-1.8376	-2.57349	-2.47828	-3.18825	-4.41088	-9.61773	2.43	0.149407	S266
R.TKS(phos)C(cam)SALSGMR.Q	H1ZYA6	Tsc1	Uncharacterized protein Tsc1 OS=Drosophila melanogaster OX=7227 GN=Tsc1 PE=4 SV=1	-2.15724	-2.0356	-1.91149	-6.17027	-2.17064	-0.282985	-8.98432	-10.5543	2.43	0.357701	S567
K.QAPQS(phos)PC(cam)SPISSNAK.C	Q6AWS1	CG30015	SD19814p OS=Drosophila melanogaster OX=7227 GN=CG30015 PE=2 SV=1	1.01312	0.834401	-3.40295	-4.7375	-4.24199	-3.73951	-3.8795	-4.13467	2.43	0.112394	S844
R.TRS(phos)TNNDWEEYADLIEDTDDLK	Q960T2	Sap47	Synapse-associated protein of 47 kDa OS=Drosophila melanogaster OX=7227 GN=Sap47 PE=1 SV=1	-3.48175	-3.47578	-3.90598	-3.95172	-3.4892	-4.21461	-10.4391	-6.33773	2.42	0.133114	S533
K.KLAGS(phos)LSSK.L	Q9VWS3	Rip11	Rab11 interacting protein isoform A OS=Drosophila melanogaster OX=7227 GN=Rip11 PE=1 SV=1	-4.75883	-4.39887	-4.8405	-4.32892	-9.84568	-3.95567	-4.13011	-10.0237	2.41	0.164053	S181
K.APS(phos)PSEVRPVEVLTHSLVNVK.G	Q9VKP5	Dmel\CG6700	Uncharacterized protein isoform A OS=Drosophila melanogaster OX=7227 GN=Dmel\CG6700 PE=1 SV=1	-6.79977	-4.37457	-4.04748	-4.90081	-4.73882	-4.20322	-10.1458	-10.6711	2.41	0.189604	S645
R.EGGGGS(phos)GNRGDSR.D	X2JE34	eIF4H1	Eukaryotic translation initiation factor 4H1 isoform E OS=Drosophila melanogaster OX=7227 GN=eIF4H1 PE=1 SV=1	-5.66999	-6.32522	-6.05655	-7.91258	-9.45937	-8.77979	-9.53574	-7.8065	2.4	0.00445672	S161
K.HRDEVLVS(phos)PVQQR.P	Q94513	BEAF-32	Boundary element associated factor OS=Drosophila melanogaster OX=7227 GN=BEAF-32 PE=1 SV=1	-7.16237	-7.05725	-6.73076	-6.84391	-9.44606	-7.79732	-10.4503	-9.69049	2.4	0.0025522	S65
R.ARPEDFSSQTNSVNPS(phos)PK.K	M9PDR8	CdGAPr	Cd GTPase activating protein-related isoform D OS=Drosophila melanogaster OX=7227 GN=CdGAPr PE=1 SV=1	-1.3748	-1.1706	-1.12947	-0.984257	-9.34103	-1.32176	-1.10426	-2.49574	2.4	0.217091	S939
R.T(phos)QT(phos)PEPLPSK.E	Q9VNE0	Dmel\CG2926	Uncharacterized protein isoform A OS=Drosophila melanogaster OX=7227 GN=Dmel\CG2926 PE=1 SV=1	-0.143034	-3.26564	0.174608	0.230674	-3.59767	-3.43238	-2.87367	-2.69923	2.4	0.0192059	T1620,T1622
R.QGPT(phos)SPSTPR.T	M9PEB2	Chd1	Chromodomain-helicase-DNA-binding protein 1 isoform C OS=Drosophila melanogaster OX=7227 GN=Chd1 PE=1 SV=1	3.97098	6.04305	5.69467	6.30061	4.16144	5.20183	3.29644	-0.248037	2.4	0.0806419	T1750
K.EESVPKPEVAANQNIS(phos)DKQELPPPPNAAPK.V	Q9W366	Dmel\CG12121	RE59932p OS=Drosophila melanogaster OX=7227 GN=Dmel\CG12121 PE=1 SV=1	-4.26742	-3.95644	-2.8919	-3.87229	-4.44277	-10.247	-5.17247	-4.68581	2.39	0.104224	S240
K.SQDDAS(phos)PPKQAEHK.A	A0A0B4KHP8	Rad60	Rad60 isoform F OS=Drosophila melanogaster OX=7227 GN=Rad60 PE=4 SV=1	-1.80948	0.187569	-1.00292	-1.01489	-2.35798	-1.76953	-2.11397	-6.9451	2.39	0.081053	S74
R.NNS(phos)QQST(phos)GT(phos)VASTGTTPSKENEAPAAAASDSTGETPTKK.H	Q9VHC8	Dmel\CG8149	LD31448p OS=Drosophila melanogaster OX=7227 GN=Dmel\CG8149 PE=1 SV=1	-0.300059	-1.01869	-1.96496	-1.79997	-9.69056	-1.85608	-1.55136	-1.51568	2.38	0.241022	S123,T127,T129
R.S(phos)M(ox)DALALAEK.E	A0A0B4LG23	cora	Coracle isoform G OS=Drosophila melanogaster OX=7227 GN=cora PE=1 SV=1	-3.88179	-3.75673	-3.7373	-4.43171	-6.78119	-4.48556	-10.1202	-3.93031	2.38	0.106882	S367
K.QES(phos)FPKVER.E	Q9W4C1	Dmel\CG15784	IP13321p OS=Drosophila melanogaster OX=7227 GN=Dmel\CG15784 PE=1 SV=1	-6.53626	-6.46065	-6.36609	-7.88013	-8.81073	-8.94604	-9.33847	-9.6508	2.38	0.000449623	S515
R.RS(phos)NNAINSGYQDEN(d)C(cam)AYNSN(d)GPESNSR.S	Q7JRH5	Dmel\CG5726	RE28271p OS=Drosophila melanogaster OX=7227 GN=Dmel\CG5726 PE=1 SV=1	-4.07572	-0.919215	-0.599098	-0.740075	-7.79455	-6.8048	-0.727897	-0.515404	2.38	0.254371	S613
R.TAT(phos)VGADS(phos)DEEDIEPPQPDAGDLTR.R	X2JAI4	Mcm3	DNA helicase OS=Drosophila melanogaster OX=7227 GN=Mcm3 PE=1 SV=1	-8.14944	-5.98452	-6.36609	-6.31187	-7.33113	-9.80313	-10.025	-9.15735	2.38	0.0127398	T692,S697
R.SGDSS(phos)TPLVS(phos)PTKDSDPGDVSLLQTSGSEK.L	X2JAF1	lva	Lava lamp isoform D OS=Drosophila melanogaster OX=7227 GN=lva PE=4 SV=1	-5.35885	-5.64957	-5.14607	-5.55968	-6.43631	-10.4764	-6.66938	-7.61293	2.37	0.0271864	S118,S123
R.HNQNQNHSS(phos)MADITADGR.G	Q9VGD4	ATP8B	Phospholipid-transporting ATPase OS=Drosophila melanogaster OX=7227 GN=ATP8B PE=3 SV=2	-0.922959	-0.420346	2.10743	2.02975	-2.09175	-0.198566	-2.34346	-2.06024	2.37	0.0276181	S1688
K.NFS(phos)FDDQSIRR.G	Q7JR91	Nmda1	GH12715p OS=Drosophila melanogaster OX=7227 GN=Nmda1 PE=2 SV=1	2.63313	-0.500262	-1.37674	-1.04268	-0.452372	1.03551	-0.222303	-10.1253	2.37	0.372297	S93
R.HRNS(phos)LPNVSVNDIFDDLQMK.L	L0MN72	Asator	Asator isoform J OS=Drosophila melanogaster OX=7227 GN=Asator PE=1 SV=1	-2.46177	-0.844293	-0.379521	0.693386	-9.80937	0.184135	0.0281599	-2.83842	2.36	0.319556	S1005
K.ATAS(phos)PPPTGNILR.Q	M9PD06	Usp32	Ubiquitin carboxyl-terminal hydrolase 32 OS=Drosophila melanogaster OX=7227 GN=Usp32 PE=3 SV=1	-2.19483	-2.39938	-2.70846	-2.94079	-1.6396	-5.75567	-2.7174	-9.56298	2.36	0.188628	S1562
R.LQQQQQQDQDRERVS(phos)QELIDC(cam)DIDFVEDTTSK.V	Q9W4C1	Dmel\CG15784	IP13321p OS=Drosophila melanogaster OX=7227 GN=Dmel\CG15784 PE=1 SV=1	-6.07842	-6.31362	-6.08784	-6.07538	-9.27729	-10.0649	-9.23383	-5.40449	2.36	0.0429865	S22
R.C(cam)S(phos)PPPPNEYELIASPDTESFR.K	Q9W3R6	Dok	Downstream of kinase OS=Drosophila melanogaster OX=7227 GN=Dok PE=2 SV=1	-0.204958	-0.116524	-0.883717	-0.456976	-9.09455	0.117562	-0.422562	-1.70644	2.36	0.264876	S531
R.MVRPMS(phos)R.K	Q9W0L6	Dmel\CG13907	GH22266p OS=Drosophila melanogaster OX=7227 GN=Dmel\CG13907 PE=1 SV=1	-4.32961	-4.02571	-4.32348	-4.24905	-5.37271	-5.85914	-5.75981	-9.32985	2.35	0.0270953	S485
R.ET(phos)ATESDTERDFGHSGGNGGGNHHNQR.T	Q8MQK2	ClC-c	Chloride channel protein (Fragment) OS=Drosophila melanogaster OX=7227 GN=ClC-c PE=2 SV=1	-5.91896	-1.58424	-4.02965	-3.59218	-10.1343	-3.14402	-5.64268	-5.61218	2.35	0.172702	T91
K.LRS(phos)AT(phos)PNASPLVNNIK.A	Q7JVP4	Br140	Bromodomain-containing protein 140kD isoform A OS=Drosophila melanogaster OX=7227 GN=Br140 PE=1 SV=1	-4.79994	-2.85511	-3.08885	-4.15204	-7.58985	-10.3119	-3.5939	-2.76306	2.34	0.199984	S1249,T1251
K.GS(phos)PQQGHSES(phos)PQQEEEHKSEELR.Q	Q9W4D2	Rnp4F	RNA-binding protein 4F OS=Drosophila melanogaster OX=7227 GN=Rnp4F PE=1 SV=1	-4.19556	-4.05438	-3.79638	-3.8949	-9.88162	-4.77829	-6.01854	-4.60462	2.34	0.0752915	S44,S52
R.ES(phos)EAAPPKEEPQSPC(cam)SWPK.N	Q9VCU8	Dmel\CG6985	LD15939p OS=Drosophila melanogaster OX=7227 GN=Dmel\CG6985 PE=2 SV=2	-2.34731	-0.313609	-0.174921	0.239353	0.356303	-2.76335	0.104069	-9.60736	2.33	0.318717	S10
K.GVAGADS(phos)SGAQQQAQPTNYR.C	A4V013	oaf	Out at first isoform B OS=Drosophila melanogaster OX=7227 GN=oaf PE=4 SV=1	-5.22218	-4.48406	-2.19404	-2.50424	-9.61918	-4.3288	-5.39964	-4.39542	2.33	0.120569	S294
K.N(d)GS(phos)VPAFNTR.V	Q9W0L6	Dmel\CG13907	GH22266p OS=Drosophila melanogaster OX=7227 GN=Dmel\CG13907 PE=1 SV=1	-3.88179	-4.49384	-3.88293	-4.13698	-5.62337	-9.84403	-5.27132	-4.97606	2.33	0.062072	S418
R.SQTS(phos)VNASN(d)GK.V	Q9VC57	atl	Atlastin OS=Drosophila melanogaster OX=7227 GN=atl PE=1 SV=1	-4.95125	-8.3014	-7.93897	-7.86815	-10.2794	-8.18124	-9.96901	-9.90027	2.32	0.0268197	S531
K.S(phos)VS(phos)PTT(phos)AATSSSPVKC(cam)PASTPNVDC(cam)R.V	Q494L6	eIF2B-delta	RE55357p OS=Drosophila melanogaster OX=7227 GN=eIF2B-delta PE=2 SV=1	-4.99832	-3.42966	-3.58629	-3.2979	-6.82136	-4.43672	-5.14878	-8.15817	2.31	0.028887	S211,S213,T216
K.LQAS(phos)PVQVATQGQGS(phos)PTKK.F	Q9VQ58	EMSY	FI15207p1 OS=Drosophila melanogaster OX=7227 GN=EMSY PE=1 SV=1	0.234587	0.0817611	0.00268657	0.239353	0.379563	1.11729	-9.84373	-0.353104	2.31	0.354646	S439,S450
R.DLDLPPYGS(phos)R.E	Q9VWN4	Flacc	Fl(2)d-associated complex component OS=Drosophila melanogaster OX=7227 GN=Flacc PE=1 SV=1	-2.28113	-1.06049	-0.416285	-0.651837	-6.04089	-0.227121	-6.21118	-1.11344	2.3	0.16679	S365
R.ELS(phos)MDESTPKR.Q	M9PHK2	Tao	Tao isoform I OS=Drosophila melanogaster OX=7227 GN=Tao PE=1 SV=1	-6.41633	-5.60648	-5.04026	-5.66803	-10.272	-5.95523	-5.42788	-10.2718	2.3	0.104349	S682
R.HADADQEDDS(phos)C(cam)AIEMERL	F3YD72	CG42806-RB	SD23574p OS=Drosophila melanogaster OX=7227 GN=CG42806-RB PE=1 SV=1	-2.24126	-2.70552	-2.76004	-1.93016	-2.19105	-10.1206	-3.79434	-2.74683	2.3	0.210915	S81
R.SLDS(phos)PVPTC(cam)AAGR.D	A0A0B4LFF9	Pcf11	Protein 1 of cleavage and polyadenylation factor 1 isoform E OS=Drosophila melanogaster OX=7227 GN=Pcf11 PE=1 SV=1	-0.629979	0.321441	1.16746	-0.789243	-9.95666	-0.499277	1.69264	-0.336317	2.29	0.371716	S1343
R.SGS(phos)MPAYTPR.G	H0RNJ0	NC2alpha-RA	FI17839p1 (Fragment) OS=Drosophila melanogaster OX=7227 GN=NC2alpha-RA PE=2 SV=1	-0.787589	-1.15112	-1.44263	-0.607068	-1.22048	-6.57601	-1.82405	-3.53113	2.29	0.0767225	S211
R.SDDTIGEDDTLMSGTEAGAVGMEPPSKS(phos)PVQLPESLQDLSR.F	Q9W531	Dmel\CG4281	GH10944p OS=Drosophila melanogaster OX=7227 GN=Dmel\CG4281 PE=2 SV=1	-0.864247	-2.07178	-1.04069	0.239353	-0.9017	-0.655451	-10.7945	-0.529213	2.29	0.359492	S498
R.RRGS(phos)PSFLDR.R	Q960C4	CG7971	SD07741p OS=Drosophila melanogaster OX=7227 GN=CG7971 PE=2 SV=1	-2.33048	-2.15342	-8.10404	-3.16065	-11.1265	-9.57515	-1.99304	-2.17495	2.28	0.397233	S1043
R.S(phos)QSISSPVIATSFAPLPK.L	Q9V3Y4	Mtch	LD43650p OS=Drosophila melanogaster OX=7227 GN=Mtch PE=1 SV=1	-6.46546	-7.59476	-9.18184	-6.98774	-10.4684	-9.67316	-9.22267	-9.98646	2.28	0.00629917	S295
R.S(phos)SM(ox)ASLNS(phos)AFNLDTAYEHNLDR.V	M9PFQ9	CG42348	Uncharacterized protein isoform E OS=Drosophila melanogaster OX=7227 GN=CG42348 PE=1 SV=1	-5.66999	-5.14426	-4.93693	-4.6409	-7.05884	-10.0472	-7.81683	-4.57568	2.28	0.0657585	S438,S445
K.APAVEPTHST(phos)DASQKDDDEGKPK.T	Q9VPM7	Dmel\CG17078	IP13529p OS=Drosophila melanogaster OX=7227 GN=Dmel\CG17078 PE=1 SV=2	-5.97018	-5.73982	-5.4848	-6.4302	-5.89085	-10.1512	-10.1262	-6.59219	2.28	0.0656215	T70
K.LAS(phos)GEGQGNVLGSIFR.S	A0A0B4K7J2	Nup358	E3 SUMO-protein ligase RanBP2 OS=Drosophila melanogaster OX=7227 GN=Nup358 PE=1 SV=1	-6.84687	-7.20799	-7.26697	-7.57086	-9.57595	-9.59486	-9.4893	-9.3245	2.27	7.02e-06	S2284
R.LSAES(phos)PISEEDPVAATK.I	Q9VC62	Esyt2	Extended synaptotagmin-like protein 2 isoform A OS=Drosophila melanogaster OX=7227 GN=Esyt2 PE=1 SV=1	-1.74673	-1.37766	-1.39293	-1.32879	-1.60267	-1.76953	-1.82405	-9.74021	2.27	0.251779	S633
K.WRDES(phos)DDEEGDQKDNSMFGNF.L	E8NH46	CG16817-RA	MIP29050p OS=Drosophila melanogaster OX=7227 GN=CG16817-RA PE=2 SV=1	-2.12061	-2.01198	-1.88262	-0.921646	-1.68714	-2.16306	-1.79618	-10.3347	2.26	0.281047	S117
R.EKS(phos)PDAVENKR.G	Q8IQ71	dikar	Dikar isoform C OS=Drosophila melanogaster OX=7227 GN=dikar PE=1 SV=2	-4.64208	2.02084	-4.84941	-6.38966	-5.1754	-6.02572	-5.73139	-5.94825	2.26	0.227753	S1347
K.NPEHAAS(phos)DDEVANKS(phos)LILAPQVDQQEVPTDKPAK.R	Q9W019	Dmel\CG15877	IP09724p OS=Drosophila melanogaster OX=7227 GN=Dmel\CG15877 PE=1 SV=1	-1.57335	-1.85138	-1.76205	-1.58553	-2.32002	-1.73631	-2.19051	-9.58445	2.26	0.226276	S31,S39
K.QRS(phos)SGAS(phos)AIAVGTELPR.N	Q86P46	CG8046	SD23581p (Fragment) OS=Drosophila melanogaster OX=7227 GN=CG8046 PE=2 SV=1	-1.03439	-0.921964	-4.37723	-3.88985	-4.15921	-3.75939	-1.60273	-9.72992	2.26	0.245073	S33,S37
K.YS(phos)PPPPPNSNTSSTTPNTLLENLK.A	Q9VQ30	chinmo	Zinc finger protein chinmo OS=Drosophila melanogaster OX=7227 GN=chinmo PE=1 SV=3	0.919482	1.18035	2.12175	1.83355	-9.91239	1.78672	2.9283	2.21947	2.26	0.445166	S455
K.TPVRGS(phos)SHDLREQS(phos)PDGTLRR.Q	E1JH63	shot	Short stop isoform O OS=Drosophila melanogaster OX=7227 GN=shot PE=1 SV=1	-3.04018	-4.14912	-1.13627	-1.02872	-9.03421	-4.15194	-4.16059	-1.03255	2.26	0.214094	S4967,S4975
K.AEDS(phos)DEEMIIPDRR.R	Q9Y102	rgn	BcDNA.GH11973 OS=Drosophila melanogaster OX=7227 GN=rgn PE=1 SV=1	-2.7332	-0.952555	-0.668856	-0.506904	-1.50146	-1.72405	-9.53644	-1.10567	2.25	0.274179	S245
K.ET(phos)AASASVN(d)PTPSPK.R	Q8T096	CG15439	LD18949p OS=Drosophila melanogaster OX=7227 GN=CG15439 PE=2 SV=1	1.36918	2.47982	-0.224774	-0.740075	-1.7363	-2.93174	-1.24473	-0.219771	2.25	0.032357	T678
K.KAVS(phos)DNES(phos)EDDVENVVEKDALK.E	Q5U0X8	Dmel\CG12325	LD10780p OS=Drosophila melanogaster OX=7227 GN=Dmel\CG12325 PE=1 SV=1	-5.90893	-5.23981	-4.95605	-5.6594	-9.92379	-9.84409	-5.73844	-5.22747	2.24	0.0979288	S247,S251
K.SSKQS(phos)DPEVGDLDEALAALDFGESR.Q	P23647	fu	Serine/threonine-protein kinase fused OS=Drosophila melanogaster OX=7227 GN=fu PE=1 SV=2	-5.06915	-4.55057	-4.85838	-5.49683	-5.46251	-5.52829	-7.72149	-10.2078	2.24	0.0680385	S287
K.GTQQLGLPLAAPPPPPPPPAAEQVPETPASPT(phos)DDGEEPPAVYLSPYIR.S	O02193	mof	Males-absent on the first protein OS=Drosophila melanogaster OX=7227 GN=mof PE=1 SV=1	0.584397	0.148795	-0.0817445	-0.684297	0.296456	-9.66482	-0.0113468	0.406196	2.24	0.355308	T266
R.HHVQGSSANSAPPTEEVVSVEPEN(d)GHTPPY(phos)LPLGEPPEPEELIR.A	Q8SX50	FBgn0035318	RE04530p OS=Drosophila melanogaster OX=7227 GN=FBgn0035318 PE=1 SV=1	-0.364987	-1.38523	-0.519167	-0.815967	0.332661	-1.33103	-9.77268	-1.28733	2.24	0.317409	Y217
R.GS(phos)QDSLTIK.D	H6WS59	Patronin	Patronin (Fragment) OS=Drosophila melanogaster OX=7227 GN=Patronin PE=2 SV=1	-4.43002	-5.59942	-4.77963	-5.00629	-5.7229	-3.94046	-9.3565	-9.70059	2.23	0.129623	S1476
K.VGFYQ(d)DTTTKS(phos)SPDKSC(cam)S(phos)PR.E	Q8IQ71	dikar	Dikar isoform C OS=Drosophila melanogaster OX=7227 GN=dikar PE=1 SV=2	0.0118258	-0.0579002	0.104244	-0.0155228	-4.72685	-4.20095	-0.0657637	0.104718	2.23	0.100643	S1991,S1998
R.S(phos)TSAFQNENLDGEPSNTQYSDPEVEPDIPIR.R	Q5U1E3		SD27713p OS=Drosophila melanogaster OX=7227 PE=2 SV=1	1.53908	1.0033	1.99914	1.54938	1.49028	-9.62697	4.26229	1.04141	2.23	0.448494	S45
K.QAIS(phos)LDGTAPDQELER.N	Q8MT29	Tom70	RE66761p OS=Drosophila melanogaster OX=7227 GN=Tom70 PE=2 SV=1	-3.71961	-4.19095	-3.81808	-3.99994	-7.85929	-3.61353	-9.12522	-4.03084	2.23	0.119094	S62
K.YSS(phos)DDEMNSATVLKDK.M	Q8I077	Usp1	BcDNA.LD22910 OS=Drosophila melanogaster OX=7227 GN=Usp1 PE=1 SV=1	-5.70427	-2.10263	-3.33411	-3.95172	-10.1906	-1.28527	-2.56854	-9.96801	2.23	0.355414	S632
R.SSSSSYASGRS(phos)PQLQEEVK.C	Q9XZ11	Dmel\CG7139	Uncharacterized protein OS=Drosophila melanogaster OX=7227 GN=Dmel\CG7139 PE=1 SV=1	-3.34195	-3.15802	-3.11548	-3.06352	-10.772	-3.87574	-3.04894	-3.887	2.23	0.216128	S794
R.SPS(phos)PTASSGIEGGSIK.D	Q9VB98	CG5521	Probable Rho GTPase-activating protein CG5521 OS=Drosophila melanogaster OX=7227 GN=CG5521 PE=1 SV=2	-1.71908	-1.13508	-1.4941	-1.14815	-9.84557	-1.32485	-1.32542	-1.92632	2.23	0.277761	S796
K.E(ac)LDTIKEGSDEADST(phos)GEAEQ(d)AQSDEKPSK.K	Q9I7K6	CG8223	Protein NASP homolog OS=Drosophila melanogaster OX=7227 GN=CG8223 PE=1 SV=1	-4.41575	-5.01654	-7.17897	-9.32086	-8.90913	-9.25671	-8.2052	-8.49716	2.23	0.0682484	T186
R.LLESQTS(phos)DEDNEDIER.R	A0A2Z5Y5E4	GlcAT-S	Galactosylgalactosylxylosylprotein 3-beta-glucuronosyltransferase OS=Drosophila melanogaster OX=7227 GN=GlcAT-S PE=2 SV=1	-3.45597	-2.82393	-2.98702	-2.71163	-9.61271	-3.58812	-3.77607	-3.88344	2.22	0.141739	S13
K.QAAVAEN(d)AGEDEAS(phos)DDEEGGSTVK.S	M9ND37	eIF5B	Eukaryotic translation initiation factor 5B isoform E OS=Drosophila melanogaster OX=7227 GN=eIF5B PE=1 SV=1	-2.94744	-4.0665	-2.74957	-3.3877	-3.2434	-10.2116	-3.62462	-4.94611	2.22	0.179068	S204
R.TQS(phos)PSVASGSSNEGWLQSNGNANQN(d)GR.G	Q7KU93	lqf	Liquid facets isoform C OS=Drosophila melanogaster OX=7227 GN=lqf PE=1 SV=1	-1.64438	-0.831315	-0.713914	-0.774607	-1.73131	-9.83913	-0.280643	-0.977087	2.22	0.311938	S355
V.APSVTQ(d)RGNDM(ox)QLES(phos)MEQR.S	M9PB69	Piezo	Piezo-type mechanosensitive ion channel component OS=Drosophila melanogaster OX=7227 GN=Piezo PE=1 SV=1	-0.951627	-1.03051	-0.951052	-6.81295	-0.868438	-5.94761	-6.72855	-5.08605	2.22	0.251654	S405
R.QIS(phos)GTASSVAFTPLQGLEIVNPQAAER.S	Q9VUM1	Prp31	LD41209p OS=Drosophila melanogaster OX=7227 GN=Prp31 PE=1 SV=1	-3.70218	-5.42083	-5.66971	-6.13395	-6.61015	-6.79109	-8.15904	-8.25031	2.22	0.00969954	S454
R.FDSIDS(phos)DKKPR.A	Q59DP9	PMCA	Calcium-transporting ATPase OS=Drosophila melanogaster OX=7227 GN=PMCA PE=1 SV=3	0.00189256	-2.85511	-2.69837	0.0533607	-3.48079	-3.54291	-3.93718	-3.38587	2.21	0.0212706	S1090
K.AC(cam)STAS(phos)PLSSSR.S	B6IDS7	key-RA	FI08812p OS=Drosophila melanogaster OX=7227 GN=key-RA PE=2 SV=1	-2.26505	-1.67407	-1.85994	-2.16956	-2.69441	-2.38962	-9.14633	-2.58666	2.21	0.184319	S331
K.APS(phos)NSDLS(phos)ILSIPN(d)DLNANEAQPVPAPR.A	B5RIT7	Apc2-RA	FI05284p (Fragment) OS=Drosophila melanogaster OX=7227 GN=Apc2-RA PE=2 SV=1	-5.08037	-3.04582	-2.35127	-3.89237	-9.61545	-10.1091	-1.64768	-1.84636	2.21	0.346795	S869,S874
K.TNS(phos)KENIVKEDVVPLAK.E	Q8MZ12	CG10265	RE23651p OS=Drosophila melanogaster OX=7227 GN=CG10265 PE=2 SV=1	-1.01745	-1.71163	-2.11805	-2.37499	-9.11718	-1.67996	-3.18689	-2.03048	2.2	0.211274	S125
R.SQS(phos)PQPSMK.K	C4IXX9	CG8516-RA	GM31468p (Fragment) OS=Drosophila melanogaster OX=7227 GN=CG8516-RA PE=2 SV=1	-1.67062	-2.26068	-1.9232	-1.97631	-9.68784	-2.43554	-2.22725	-2.29957	2.2	0.229757	S139
K.VAEMVEVATVS(phos)PTR.K	X2JFU8	baz	Bazooka isoform C OS=Drosophila melanogaster OX=7227 GN=baz PE=1 SV=1	-3.90403	-3.97687	-3.92234	-5.33691	-5.33587	-5.75567	-10.5246	-4.32387	2.2	0.132772	S418
R.TSS(phos)FAEGNKQSPSLVLGGVK.T	A4V3W2	sgg	Shaggy isoform C OS=Drosophila melanogaster OX=7227 GN=sgg PE=1 SV=1	-6.74522	-6.82546	-6.49578	-7.39151	-6.86618	-9.15118	-9.35285	-10.8281	2.19	0.0247565	S10
K.QDQNAAGEEDDS(phos)KDWDDIIPEGFR.K	M9PEB2	Chd1	Chromodomain-helicase-DNA-binding protein 1 isoform C OS=Drosophila melanogaster OX=7227 GN=Chd1 PE=1 SV=1	3.00665	5.70173	5.67962	6.35361	4.0571	5.21847	3.04042	-0.348506	2.19	0.130739	S1097
R.QVQTPS(phos)PVEESAPR.V	Q7K105	Myd88	LD20892p OS=Drosophila melanogaster OX=7227 GN=Myd88 PE=1 SV=1	-0.408482	-0.127588	-1.32922	-1.18638	-2.73381	0.0115612	0.164411	-9.24304	2.19	0.313577	S394
K.QVFC(cam)VDSS(phos)DEENENAR.K	M9NF67	nbs	Nibrin OS=Drosophila melanogaster OX=7227 GN=nbs PE=1 SV=1	-3.40751	-1.95456	-1.96496	-3.19609	-9.61973	-2.33888	-3.32608	-4.00746	2.19	0.194075	S479
R.DLS(phos)PGAGGGGGGGSAGGGGGGSGN(d)GGGPLNN(d)GNSYR.S	R9PY73	wcy	Wacky isoform C OS=Drosophila melanogaster OX=7227 GN=wcy PE=4 SV=1	-0.617165	-1.81005	-1.84873	-1.13687	-2.33508	-8.55353	-2.91304	-0.353104	2.19	0.219164	S52
R.S(phos)GDLLPQGATLLR.W	A0A0B4K703	Mical	Molecule interacting with CasL isoform K OS=Drosophila melanogaster OX=7227 GN=Mical PE=4 SV=1	-1.95023	-2.68669	-2.80267	-3.06352	-2.55558	-3.51447	-3.22354	-9.98669	2.19	0.20978	S559
R.NDRS(phos)PDRDLYR.D	Q8IPW6	cg4896	Uncharacterized protein isoform K OS=Drosophila melanogaster OX=7227 GN=cg4896 PE=4 SV=4	3.59778	5.54258	4.76478	-0.0172447	2.86245	-2.23664	2.64036	1.8709	2.19	0.202409	S63
R.VPSST(phos)TDAPALPIVAEAESTQK.S	Q6NP21	CG12124	LD32107p (Fragment) OS=Drosophila melanogaster OX=7227 GN=CG12124 PE=2 SV=1	-4.47001	-6.87403	-5.1135	-4.26533	-5.83839	-10.0277	-9.31581	-4.28353	2.19	0.152339	T1533
K.IYNSSGAHPSTS(phos)PSLPATPTSAPSTAQTSK.R	M9PDR5	spen	Split ends isoform F OS=Drosophila melanogaster OX=7227 GN=spen PE=1 SV=1	1.45056	-0.633603	-2.31997	0.537912	0.593608	-0.212773	-10.4725	0.406196	2.18	0.420671	S2762
R.GGS(phos)SSSVVDGVAPSK.L	E1JGN0	par-1	Non-specific serine/threonine protein kinase OS=Drosophila melanogaster OX=7227 GN=par-1 PE=1 SV=1	-0.971061	-1.82027	-0.996722	-1.82388	-8.13076	-1.71189	-1.59471	-2.90887	2.18	0.167768	S322
R.YMDVPNIS(phos)PSAEQK.A	A1Z721	Dmel\CG43340	Uncharacterized protein isoform E OS=Drosophila melanogaster OX=7227 GN=Dmel\CG43340 PE=4 SV=1	0.444722	-6.78646	0.330673	0.126921	-3.713	-3.29303	-3.77789	-3.83462	2.18	0.218041	S442
R.S(phos)LT(phos)PPRR.R	Q9V468	CG9776	Zinc finger matrin-type protein CG9776 OS=Drosophila melanogaster OX=7227 GN=CG9776 PE=1 SV=1	-2.63694	-2.49439	-2.9151	-2.75695	-3.50445	-10.0145	-3.05995	-2.95472	2.18	0.204208	S84,T86
K.AEPEPES(phos)EPQPDEEADAEVDSKFEESK.E	F6J9M9	CG1703	CG1703 (Fragment) OS=Drosophila melanogaster OX=7227 GN=CG1703 PE=4 SV=1	-3.23785	-3.63085	-4.33595	-3.61703	-3.83406	-3.17707	-10.3087	-6.17259	2.17	0.186133	S184
K.KSEAAGADDDYLDEGPGEEDGAGGHLS(phos)S(phos)EEDEDKDNLELDSLIK.A	P35600	Gnf1	Replication factor C subunit 1 OS=Drosophila melanogaster OX=7227 GN=Gnf1 PE=1 SV=2	-6.00181	-5.10875	-4.63011	-4.27519	-4.48921	-9.62458	-5.27132	-9.31313	2.17	0.128754	S939,S940
K.AST(phos)SSTTATTSPSLAQPNK.I	H1UUG6	mip120-RA	FI18123p1 OS=Drosophila melanogaster OX=7227 GN=mip120-RA PE=2 SV=1	-6.2325	-4.82736	-4.77114	-5.07349	-5.95458	-9.85404	-5.05773	-8.67902	2.16	0.0835479	T243
R.S(phos)RENLAC(cam)DEVTSTTSSSTAMNGGGR.T	O46122	puc	Puckered protein OS=Drosophila melanogaster OX=7227 GN=puc PE=2 SV=1	0.701543	-0.674742	-0.562008	-0.633234	-0.0329773	1.15651	-0.853906	-10.0298	2.15	0.390168	S90
R.SLT(phos)PS(phos)KTS(phos)PRGSPAFVR.H	P46863	Klp61F	Kinesin-like protein Klp61F OS=Drosophila melanogaster OX=7227 GN=Klp61F PE=1 SV=2	-1.62886	-2.05357	-2.25934	-2.12432	-2.82658	-2.47609	-2.53745	-8.80749	2.15	0.172933	T1046,S1048,S1051
R.KNS(phos)QGGQSSIYTPAPEYDDPANC(cam)AEEDQYRR.Y	A0A0B4K7H9	Dscam1	Down syndrome cell adhesion molecule 1 isoform BI OS=Drosophila melanogaster OX=7227 GN=Dscam1 PE=1 SV=1	-1.49156	-1.34778	-2.31997	-1.96297	-8.86988	-2.14116	-2.20266	-2.48224	2.14	0.199326	S1843
R.HVRPLSNAS(phos)PDEQSENER.S	M9PDH1	E(bx)	Enhancer of bithorax isoform H OS=Drosophila melanogaster OX=7227 GN=E(bx) PE=1 SV=1	-2.96033	-3.38043	-3.91999	-3.15457	-2.86981	-6.11683	-5.28675	-7.69771	2.14	0.0563879	S2491
K.DGPDQESMPLPADN(d)GES(phos)PSKQQAPVNR.D	Q541C9	Ts	RE18955p OS=Drosophila melanogaster OX=7227 GN=Ts PE=1 SV=1	-4.53023	-6.56541	-4.69689	-4.68401	-10.2989	-9.49899	-4.66941	-4.57855	2.14	0.185399	S25
M.S(ac)S(phos)GDFGNPLR.K	X2J5T3	Rab6	Rab6 isoform B OS=Drosophila melanogaster OX=7227 GN=Rab6 PE=1 SV=1	-7.85946	-7.44553	-6.90002	-6.97698	-7.81806	-9.57846	-10.2781	-10.0125	2.13	0.00623276	S4
R.S(phos)QDELGLMAQDAQQR.D	P42283	lola	Longitudinals lacking protein isoform G OS=Drosophila melanogaster OX=7227 GN=lola PE=1 SV=2	-2.84828	-2.78337	-2.02678	-2.0102	-2.1639	-2.75501	-10.5856	-2.66834	2.13	0.28675	S438
R.GHPEEYTDGM(ox)NLGEERFDS(phos)IDS(phos)DKKPR.A	Q59DP9	PMCA	Calcium-transporting ATPase OS=Drosophila melanogaster OX=7227 GN=PMCA PE=1 SV=3	-2.40781	-5.07899	-2.65867	-2.34873	-9.667	-3.60002	-4.36376	-3.36096	2.12	0.193545	S1087,S1090
K.HNQVGS(phos)PK.K	P13468	fs(1)K10	DNA-binding protein K10 OS=Drosophila melanogaster OX=7227 GN=fs(1)K10 PE=2 SV=2	-0.617165	1.58069	-0.183698	2.26398	-0.930017	1.41396	-1.65183	-4.24884	2.12	0.129665	S117
R.RQGPTS(phos)PSTPR.T	M9PEB2	Chd1	Chromodomain-helicase-DNA-binding protein 1 isoform C OS=Drosophila melanogaster OX=7227 GN=Chd1 PE=1 SV=1	4.07334	6.28202	6.25141	7.00701	4.72384	6.03899	3.98121	0.406196	2.12	0.13112	S1751
K.SNIQTNEETQQNNLPS(phos)PSR.N	Q06K00	cdc6	Cell division control protein OS=Drosophila melanogaster OX=7227 GN=cdc6 PE=3 SV=1	-1.68125	-1.45917	-1.78858	-1.51572	-1.56221	-1.41395	-10.5583	-1.37812	2.12	0.339952	S247
R.QAPVTLPVSNAS(phos)	P53624	alpha-Man-Ia	Mannosyl-oligosaccharide alpha-1 2-mannosidase IA OS=Drosophila melanogaster OX=7227 GN=alpha-Man-Ia PE=2 SV=2	-7.8556	-7.38117	-7.8151	-7.90848	-10.9379	-10.1273	-9.79081	-8.60066	2.12	0.00261348	S668
K.SSGGAGS(phos)GS(phos)GDS(phos)VKTPGSAK.K	P22058	D1	Chromosomal protein D1 OS=Drosophila melanogaster OX=7227 GN=D1 PE=1 SV=3	-5.20982	-4.9477	-3.55498	-4.52662	-6.07084	-10.2558	-4.9392	-5.41471	2.11	0.110544	S108,S110,S113
R.STS(phos)PAVT(phos)PSSELK.L	M9MRJ4	Msp300	Muscle-specific protein 300 kDa isoform G OS=Drosophila melanogaster OX=7227 GN=Msp300 PE=1 SV=1	-2.50833	-3.08226	-2.36718	-2.44742	-2.79499	-2.84067	-10.6506	-2.56516	2.11	0.279995	S2290,T2294
R.SRS(phos)PS(phos)PQVFNPR.K	M9PB57	Wee1	Wee1-like protein kinase OS=Drosophila melanogaster OX=7227 GN=Wee1 PE=3 SV=1	1.24835	0.614896	0.460268	0.595381	-2.50359	-2.20789	-1.6394	0.814224	2.11	0.0205124	S26,S28
R.EDS(phos)GSGMGDYNLGGFGGPGENDQTESAAILK.I	C8VUZ9	Ssdp-RB	RE64068p OS=Drosophila melanogaster OX=7227 GN=Ssdp-RB PE=2 SV=1	0.0998287	-3.46451	0.679375	0.187973	-1.40292	1.34289	-0.935158	-9.94396	2.11	0.409946	S394
R.RSETVSTQTQGLGS(phos)PAASSSTTR.Q	Q9VV52	RAF2	LD37257p OS=Drosophila melanogaster OX=7227 GN=RAF2 PE=1 SV=3	-2.19483	-2.21277	-2.57316	-2.73411	-9.95857	-2.73027	-2.50701	-2.97348	2.11	0.239978	S722
R.N(d)PNS(phos)AAEN(d)IK.S	Q8MRT0	CG9684	SD27884p OS=Drosophila melanogaster OX=7227 GN=CG9684 PE=2 SV=1	-2.45264	-2.40706	-2.31225	-2.28927	-2.80544	-2.91306	-9.87504	-2.27029	2.1	0.241673	S316
K.EKGEGQEPATSAEKPDPAAPTEPAEENSKEPAPEDAS(phos)PDKK.D	Q7KJ96	La2	La autoantigen-like 2 OS=Drosophila melanogaster OX=7227 GN=La2 PE=2 SV=1	-2.40781	-1.06049	-0.534803	-1.17096	-9.21949	-0.156765	-0.738908	-3.46328	2.1	0.308604	S46
K.ES(phos)DLDSEAEAEQQER.R	O46307	Dmel\CG11417	EG:8D8.4 protein OS=Drosophila melanogaster OX=7227 GN=Dmel\CG11417 PE=4 SV=1	-5.22218	-3.89898	-5.23085	-4.12803	-3.8578	-7.85036	-6.71596	-8.40466	2.09	0.0700133	S125
R.GLQAPS(phos)RS(phos)PS(phos)PSAER.L	Q9XYZ6	Dmel\CG5808	Peptidyl-prolyl cis-trans isomerase OS=Drosophila melanogaster OX=7227 GN=Dmel\CG5808 PE=2 SV=1	-2.9997	0.0679723	0.504649	-0.355474	-3.83192	-2.2959	-1.62299	-3.41121	2.09	0.0440136	S177,S179,S181
K.NEPADKPLLPYNSPPS(phos)PLYLPGDER.L	Q7JWI7	Dmel\CG11665	RE60337p OS=Drosophila melanogaster OX=7227 GN=Dmel\CG11665 PE=1 SV=1	0.234587	-0.500262	-0.582754	-0.082443	-10.2212	0.25811	0.668093	0.0124162	2.09	0.412926	S289
K.VQSSGIALFNADGSEVTKS(phos)DEEEGESETFK.Y	Q2PE14	CG4622	Zinc finger CCHC domain-containing protein 8 homolog OS=Drosophila melanogaster OX=7227 GN=CG4622 PE=1 SV=2	-1.25483	-0.651742	-0.196076	-0.200722	-0.742564	-9.98456	-0.0796949	0.126899	2.09	0.379032	S293
K.QQLIPTELENLFDAHGDS(phos)DAEGEPR.Q	Q9VXW7	gce	Germ cell-expressed bHLH-PAS isoform C OS=Drosophila melanogaster OX=7227 GN=gce PE=1 SV=2	-3.61196	-4.245	-3.73523	-2.85208	-4.47245	-4.29213	-3.78335	-10.2667	2.09	0.182052	S420
R.KLS(phos)AMSNK.S	Q961G1	Cog3	Conserved oligomeric Golgi complex subunit 3 OS=Drosophila melanogaster OX=7227 GN=Cog3 PE=1 SV=1	-6.73278	-5.53067	-5.55594	-4.69719	-10.5362	-5.83081	-9.53991	-4.98745	2.09	0.149972	S857
K.DQS(phos)PVPEGSAR.R	Q9VID9	BEST:LD19244	Uncharacterized protein isoform B OS=Drosophila melanogaster OX=7227 GN=BEST:LD19244 PE=1 SV=3	0.13358	0.400587	0.379156	0.428322	-1.94006	-1.78219	-0.390953	-2.84704	2.08	0.0033343	S1100
K.QENGFGAS(phos)PNQ(d)KENGQASIAEAR.A	Q0E8J0	MEP-1	MEP-1 isoform A OS=Drosophila melanogaster OX=7227 GN=MEP-1 PE=1 SV=1	-7.19856	-7.59196	-7.87207	-9.01582	-9.36039	-9.31045	-10.2368	-11.0832	2.08	0.00577551	S217
K.S(phos)IELLETTSNERDPKPMDLC(cam)IR.S	M9PDR8	CdGAPr	Cd GTPase activating protein-related isoform D OS=Drosophila melanogaster OX=7227 GN=CdGAPr PE=1 SV=1	-3.25362	-4.63466	-3.1021	-3.29957	-6.82987	-9.62746	-2.89322	-3.26542	2.08	0.203451	S814
K.SRT(phos)PS(phos)PAVGK.S	M9PDL0	EG:152A3.3	Uncharacterized protein isoform B OS=Drosophila melanogaster OX=7227 GN=EG:152A3.3 PE=4 SV=1	0.691278	6.55188	-0.212148	0.852701	0.788676	2.17832	-0.287094	-3.1225	2.08	0.269079	T179,S181
R.LLAT(phos)PS(phos)PPPQK.A	Q9VZ60	Dmel\CG2186	Uncharacterized protein isoform A OS=Drosophila melanogaster OX=7227 GN=Dmel\CG2186 PE=1 SV=1	2.28621	1.60477	1.57378	1.92156	1.37927	1.656	-5.41652	1.4636	2.08	0.229852	T986,S988
K.ES(phos)KPVIDDDNSEDLDEQEADDDEDEFFSAHDATSR.N	Q9VT00	Jarid2	Jumonji AT rich interactive domain 2 OS=Drosophila melanogaster OX=7227 GN=Jarid2 PE=1 SV=3	-1.15514	-2.09021	-2.07823	-1.61652	-1.3754	-10.9409	-0.958135	-1.92632	2.07	0.374365	S275
K.NSLNSS(phos)PLPQR.Q	Q24113	nonA-l	FI21126p1 OS=Drosophila melanogaster OX=7227 GN=nonA-l PE=1 SV=2	1.24835	0.951676	1.83069	1.63409	-0.619861	1.13423	-3.11627	0.0242821	2.06	0.044085	S14
K.HIDADNEDDKSS(phos)TTASQ(d)PTK.I	A1A708	CG4951	Uncharacterized protein CG4951 OS=Drosophila melanogaster OX=7227 GN=CG4951 PE=1 SV=1	-5.78452	0.344501	-3.55863	-3.35249	-6.09116	-4.0669	-5.95965	-4.45479	2.06	0.143054	S186
R.ERS(phos)LDT(phos)VERER.E	Q9VWN4	Flacc	Fl(2)d-associated complex component OS=Drosophila melanogaster OX=7227 GN=Flacc PE=1 SV=1	-3.62422	-1.98298	-6.03606	-2.55336	-3.94758	-4.12805	-9.20898	-5.16147	2.06	0.179183	S369,T372
K.LESGGS(phos)ENAGYASQQR.Q	O46093	mip130	EG:86E4.4 protein OS=Drosophila melanogaster OX=7227 GN=mip130 PE=4 SV=1	-1.79209	-1.46317	-2.28933	-1.4868	-1.83459	-5.34688	-4.51001	-3.57772	2.06	0.0232295	S729
K.SNLEYHPEKPALDAS(phos)PAK.K	Q5BIE2	CG12877	RE36502p OS=Drosophila melanogaster OX=7227 GN=CG12877 PE=2 SV=1	-2.51783	-2.48622	-2.26678	-2.85208	-2.81597	-2.90381	-9.41021	-3.23116	2.06	0.202813	S91
R.ES(phos)ESAAGTPVNADQPGSPN(d)AK.S	X2JE07	Dmel\CG1677	Uncharacterized protein isoform D OS=Drosophila melanogaster OX=7227 GN=Dmel\CG1677 PE=1 SV=1	-1.08289	-3.22434	-1.43004	-2.28927	-4.25053	-4.90914	-2.28419	-4.79835	2.05	0.0231836	S137
R.FERTDS(phos)ELAC(cam)EEAAR.L	Q9W0L6	Dmel\CG13907	GH22266p OS=Drosophila melanogaster OX=7227 GN=Dmel\CG13907 PE=1 SV=1	-5.0415	-4.92105	-5.24842	-4.94209	-10.5907	-5.30244	-6.04454	-6.39726	2.05	0.101675	S31
K.VS(phos)SPAAVENSLNPR.Q	Q9W0N9	ebd1	Earthbound 1 OS=Drosophila melanogaster OX=7227 GN=ebd1 PE=2 SV=2	-0.191599	-0.750905	-0.410092	-0.20268	-9.27566	0.57994	-1.22912	0.159545	2.05	0.361014	S499
R.HN(d)FSIKT(phos)GEQGR.L	O76928	cm	Carmine isoform A OS=Drosophila melanogaster OX=7227 GN=cm PE=1 SV=1	1.92368	1.88589	-4.33908	1.93498	2.54261	-6.44144	-5.52213	2.61235	2.05	0.465082	T283
R.DAS(phos)ESEEVINR.E	A0A0H4Y1G5	hyd-RA	FI24602p1 OS=Drosophila melanogaster OX=7227 GN=hyd-RA PE=2 SV=1	-5.46506	-7.90698	-5.51284	-5.69423	-9.37822	-10.5804	-6.62949	-6.16395	2.04	0.108061	S1618
R.KFVEWLQSAEEES(phos)ES(phos)EDEQK.N	Q9VNE2	kra	Protein krasavietz OS=Drosophila melanogaster OX=7227 GN=kra PE=1 SV=1	-9.71982	-7.40067	-4.44652	-4.71497	-5.28232	-9.73585	-10.3409	-9.07727	2.04	0.224883	S413,S415
K.SEMEYYHGGNYNS(phos)VPR.R	M9NDX8	Spn	Spinophilin isoform I OS=Drosophila melanogaster OX=7227 GN=Spn PE=1 SV=1	-2.41667	-2.69607	-2.72887	-3.03533	-4.88195	-4.43405	-4.75624	-4.97228	2.04	1.92e-05	S491
R.AGS(phos)KPNS(phos)RPLS(phos)R.Q	A1Z9J3	shot	Short stop isoform H OS=Drosophila melanogaster OX=7227 GN=shot PE=1 SV=1	-5.64481	-4.21502	-4.1566	-2.86442	-10.588	-5.10297	-4.34479	-5.01051	2.04	0.192783	S8649,S8653,S8657
K.GS(phos)TES(phos)QEKQSLEK.V	Q24458	Ask1	Protein kinase OS=Drosophila melanogaster OX=7227 GN=Ask1 PE=2 SV=1	-3.86473	-3.70657	-3.79854	-3.91274	-9.79662	-4.90914	-4.53436	-4.17535	2.03	0.135032	S608,S611
M.T(ac)(phos)SPAAAAAGAALAAGAPYR.G	Q8MSV2	shep	Protein alan shepard OS=Drosophila melanogaster OX=7227 GN=shep PE=1 SV=2	-3.4688	-6.23494	-5.00002	-5.03391	-5.00186	-8.27735	-8.76683	-5.80027	2.03	0.0786418	T98
R.RS(phos)NNAINSGYQDENC(cam)AYNSNGPESNSR.S	Q7JRH5	Dmel\CG5726	RE28271p OS=Drosophila melanogaster OX=7227 GN=Dmel\CG5726 PE=1 SV=1	-4.10404	-0.831315	-4.57364	-3.75502	-0.804128	-0.387081	-10.1446	-10.0128	2.02	0.462496	S613
R.KDS(phos)VDS(phos)NHSVVK.V	Q9VUE5	stwl	LD17962p OS=Drosophila melanogaster OX=7227 GN=stwl PE=1 SV=1	-5.1854	-5.06434	-4.67296	-5.38589	-10.2913	-5.63444	-6.38848	-6.07214	2.02	0.080688	S773,S776
K.EKSNIQTNEETQQNNLPS(phos)PSR.N	Q06K00	cdc6	Cell division control protein OS=Drosophila melanogaster OX=7227 GN=cdc6 PE=3 SV=1	-4.24517	-3.55549	-4.78817	-3.8698	-10.4742	-4.32139	-5.14409	-4.55293	2.01	0.180202	S247
R.NVLN(d)LIQ(d)GS(phos)IQR.K	Q9VX48	CG12432	SD02996p OS=Drosophila melanogaster OX=7227 GN=CG12432 PE=1 SV=2	-3.47249	-1.21374	-0.656585	4.22981	-1.38713	-0.212773	-10.3815	2.8155	2.01	0.518979	S590
R.RT(phos)PS(phos)PASR.Y	A0A0B4JDC3	TTC14	Uncharacterized protein isoform B OS=Drosophila melanogaster OX=7227 GN=TTC14 PE=4 SV=1	-4.62968	-3.92081	-3.93414	-5.81363	-9.81612	-4.0023	-7.41307	-5.11908	2.01	0.148572	T784,S786
K.VPSS(phos)PVVSGRNT(phos)PVDISAGDDISR.S	Q9W074	HBS1	FI04779p OS=Drosophila melanogaster OX=7227 GN=HBS1 PE=1 SV=2	-2.37293	-3.01028	-3.01181	-3.13649	-3.26056	-3.45923	-2.53745	-10.2722	2	0.264618	S197,T205
R.NDHNYTPFTS(phos)PEQLK.N	Q9VG78	pps	Protein partner of snf isoform A OS=Drosophila melanogaster OX=7227 GN=pps PE=1 SV=1	-1.3748	-0.921964	-1.61235	-0.751494	-0.168103	-2.02129	0.321064	-10.8054	2	0.424364	S211
K.NLEENHSQLNPNAVAFVPGVGS(phos)QSSSPLPAAEDPLPGVQPR.P	P23226	Map205	205 kDa microtubule-associated protein OS=Drosophila melanogaster OX=7227 GN=Map205 PE=1 SV=2	-0.255692	0.249964	-0.599098	1.52592	-1.97504	-2.83187	-1.46838	-0.784691	2	0.0112961	S250
K.SQAS(phos)PPLRIEDVVAAR.S	E1JIB4	Dmel\CG2162	Uncharacterized protein isoform E OS=Drosophila melanogaster OX=7227 GN=Dmel\CG2162 PE=4 SV=2	-2.38157	-1.55407	-1.57492	-2.23217	-9.49213	-1.74868	-2.41937	-2.07536	2	0.277845	S372
R.IELLRPKS(phos)PPPNSK.V	Q9VLP7	Mettl14	N6-adenosine-methyltransferase non-catalytic subunit OS=Drosophila melanogaster OX=7227 GN=Mettl14 PE=1 SV=1	-4.38067	-3.60765	-4.53719	-5.90249	-10.3996	-3.52862	-2.86399	-9.61879	2	0.315741	S375
R.SIS(phos)PLM(ox)NTR.S	Q7KMI7	BcDNA.LD22679	BcDNA.LD22679 OS=Drosophila melanogaster OX=7227 GN=BcDNA.LD22679 PE=2 SV=1	-6.66033	-1.18374	-1.80474	-1.36341	-1.03068	-1.18944	-10.1082	-6.70051	2	0.419487	S405
R.TLS(phos)EAGSS(phos)PIPN(d)TNMHEAHK.N	Q9VJK4	Dmel\CG5953	RE18252p OS=Drosophila melanogaster OX=7227 GN=Dmel\CG5953 PE=1 SV=2	-4.08416	-5.46505	-4.29886	-3.15913	-1.23807	-4.72519	-9.36569	-9.66102	2	0.323772	S411,S416
R.NSS(phos)S(phos)PNAFK.V	B7YZL1	10737	Uncharacterized protein isoform O OS=Drosophila melanogaster OX=7227 GN=10737 PE=1 SV=1	-4.62556	-2.68669	-2.81352	-3.17441	-9.68557	-5.20835	-3.22354	-3.16499	2	0.210705	S571,S572
R.AKS(phos)PS(phos)PPPTTIQR.S	B5X552	CG11873-RA	SD13785p (Fragment) OS=Drosophila melanogaster OX=7227 GN=CG11873-RA PE=2 SV=1	-2.59613	-2.25374	-2.33553	-3.67674	-5.49598	-6.01772	-3.70871	-3.61257	1.99	0.0170461	S32,S34
K.S(phos)PNMLGNK.N	E2QC61	bin3	Bicoid-interacting protein 3 isoform B OS=Drosophila melanogaster OX=7227 GN=bin3 PE=1 SV=1	-2.55645	-1.7164	-1.30221	-1.5206	-10.1683	-1.13702	-1.05114	-2.70705	1.99	0.348671	S969
R.KSGSQQ(d)KS(phos)PISK.A	Q8SX89	kuk	Kugelkern isoform A OS=Drosophila melanogaster OX=7227 GN=kuk PE=1 SV=1	-4.69281	-4.41737	-4.49813	-4.50326	-6.75826	-6.84247	-7.85313	-4.59298	1.98	0.0165434	S254
K.LTQSLGS(phos)SSTS(phos)VHSKPSPSNSAK.S	Q0KHZ4	CG31035	Uncharacterized protein isoform B OS=Drosophila melanogaster OX=7227 GN=CG31035 PE=1 SV=1	-4.6338	-5.07899	-4.89943	-5.56773	-10.0723	-6.55269	-6.52821	-4.93137	1.98	0.0899884	S379,S383
R.KHPS(phos)S(phos)DS(phos)DSEDRPMNR.L	Q7KSD3	fray	Frayed isoform A OS=Drosophila melanogaster OX=7227 GN=fray PE=1 SV=1	-8.55592	-1.26518	-5.85468	-2.9021	-9.27466	-10.2895	-3.48756	-3.46328	1.98	0.400165	S384,S385,S387
R.YALDTN(d)DIGQPES(phos)DEELC(cam)DEATRPR.R	Q9Y095	XRCC1	FI04011p OS=Drosophila melanogaster OX=7227 GN=XRCC1 PE=1 SV=1	-3.7262	-5.26751	-2.96264	-5.0395	-4.82129	-5.59818	-6.21118	-8.28363	1.98	0.0509218	S518
K.LIEHNS(phos)SDLEK.I	Q94527	Rel	Nuclear factor NF-kappa-B p110 subunit OS=Drosophila melanogaster OX=7227 GN=Rel PE=1 SV=1	-3.57978	-3.75673	-3.39152	-4.0583	-3.7898	-4.96191	-9.71817	-4.23294	1.98	0.157816	S529
R.TATVGADS(phos)DEEDIEPPQPDAGDLTR.R	X2JAI4	Mcm3	DNA helicase OS=Drosophila melanogaster OX=7227 GN=Mcm3 PE=1 SV=1	-0.453329	-0.308204	-0.349583	-0.250484	-7.39791	-0.694792	-0.583946	-0.60031	1.98	0.239272	S697
R.TAAAPS(phos)LPSIPSK.V	A0A0B4LI25	ncd	Kinesin-like protein OS=Drosophila melanogaster OX=7227 GN=ncd PE=1 SV=1	-7.53556	-7.23399	-7.57745	-8.02781	-10.3387	-9.52059	-9.26492	-9.13016	1.97	0.000388359	S115
M.PPGTQIASDS(phos)DMETALEEFK.Q	Q9VXB4	Dmel\CG9609	LD35155p OS=Drosophila melanogaster OX=7227 GN=Dmel\CG9609 PE=1 SV=1	6.08806	-0.963842	-0.363477	-0.45231	-3.35261	3.36919	-0.217674	-3.37336	1.97	0.380209	S12
R.K(ac)PVRPVN(d)S(phos)DGENWDDDDAENSAPK.K	A0A0B4KEI5	Ars2	Arsenic resistance protein 2 isoform E OS=Drosophila melanogaster OX=7227 GN=Ars2 PE=1 SV=1	2.43513	-2.55284	-1.42171	-2.20837	-2.07901	-2.28986	-5.04019	-2.23027	1.97	0.152435	S323
K.SC(cam)LKS(phos)PTK.T	B7Z0D7	Dmel\CG7504	Uncharacterized protein isoform B OS=Drosophila melanogaster OX=7227 GN=Dmel\CG7504 PE=4 SV=1	-0.584371	3.65361	0.0780495	0.295916	-0.45032	-2.58275	-1.27326	-0.138152	1.97	0.0887034	S461
N.TKVEPS(phos)PS(phos)TPLEK.K	Q9VDK7	Srp72	Signal recognition particle subunit SRP72 OS=Drosophila melanogaster OX=7227 GN=Srp72 PE=1 SV=1	-1.85689	-7.11245	-7.43116	-7.46781	-7.9566	-7.71219	-7.77852	-8.29869	1.97	0.160206	S539,S541
R.QENLT(phos)TS(phos)RDSINAIAPSDVEHLETDVEDNMQR.V	P23647	fu	Serine/threonine-protein kinase fused OS=Drosophila melanogaster OX=7227 GN=fu PE=1 SV=2	-3.09598	-2.82393	-2.80267	-3.00768	-4.06325	-3.03903	-2.91304	-9.59608	1.97	0.214135	T312,S314
R.KGGDLADS(phos)PVDEK.A	Q6NP70	CG32626	RE05438p OS=Drosophila melanogaster OX=7227 GN=CG32626 PE=2 SV=1	-1.96964	-2.46202	-2.02678	-2.65692	-9.79274	-2.31416	-2.7174	-2.11646	1.96	0.285777	S48
K.ARLES(phos)IGDST(phos)ADESTLSC(cam)DR.C	Q8IRH5	CG2199	Zinc finger protein CG2199 OS=Drosophila melanogaster OX=7227 GN=CG2199 PE=1 SV=1	-7.71966	-4.60255	-4.85838	-4.61981	-6.91063	-7.92324	-7.31489	-7.47612	1.96	0.0300924	S643,T648
R.TDSNSTT(phos)ASDPEFIELDFPLGK.L	X2JDJ3	PAPLA1	Phosphatidic acid phospholipase A1 isoform D OS=Drosophila melanogaster OX=7227 GN=PAPLA1 PE=1 SV=1	-7.7373	-6.91375	-7.14786	-9.3057	-8.79141	-10.4291	-9.27309	-10.4365	1.96	0.0167278	T1919
R.IVDNEEVS(phos)RPTEEDQVVSR.A	Q9VS47	Dmel\CG8602	LD39967p OS=Drosophila melanogaster OX=7227 GN=Dmel\CG8602 PE=2 SV=1	-6.36333	-5.37792	-6.94898	-7.67486	-8.90906	-9.33411	-7.74972	-8.17892	1.95	0.00989127	S17
K.LQEDEGEKSDQ(d)DLVVDVANEMESHS(phos)PRPNGEHVSMEVR.D	A0A0B4LHP1	gro	Groucho isoform J OS=Drosophila melanogaster OX=7227 GN=gro PE=1 SV=1	-4.30968	-4.73165	-6.22027	-5.61701	-3.97328	-5.30244	-8.96486	-10.4284	1.95	0.21581	S246
R.NLISLTGS(phos)PGGAEK.D	X2JEK7	Dmel\CG15160	Uncharacterized protein isoform B OS=Drosophila melanogaster OX=7227 GN=Dmel\CG15160 PE=4 SV=1	1.13173	-0.11495	0.448956	0.224858	0.563457	-3.76106	-3.77426	0.874461	1.95	0.149798	S549
R.VNTPT(phos)PPIDQNSDDVPSRNPS(phos)PSR.T	Q9VHP9	Cenp-C	Centromeric protein-C isoform A OS=Drosophila melanogaster OX=7227 GN=Cenp-C PE=1 SV=4	-0.375738	-1.56692	-1.29839	-1.22964	-1.35222	-9.75133	-1.43935	0.283206	1.95	0.377743	T1000,S1016
K.SKADVET(phos)DDEDMEAEREPT(phos)PPPPPPTSK.K	Q8IQ71	dikar	Dikar isoform C OS=Drosophila melanogaster OX=7227 GN=dikar PE=1 SV=2	-2.03631	-0.995344	-1.09264	-2.6677	-9.87326	-1.00754	-2.25861	-1.44526	1.95	0.347155	T941,T953
R.SMAEDGS(phos)PS(phos)PEKEKPEK.L	E1JIP3	WRNexo	WRN exonuclease isoform B OS=Drosophila melanogaster OX=7227 GN=WRNexo PE=4 SV=1	2.15042	0.66155	1.40258	0.785154	-0.569991	-2.3514	0.00194268	0.159545	1.94	0.0161641	S111,S113
K.KVAEKDS(phos)ES(phos)DVDAGT(phos)EDEKSAQPQK.V	Q9VX35	CC4	LD36501p OS=Drosophila melanogaster OX=7227 GN=CC4 PE=1 SV=1	-2.88467	-1.66483	-2.49243	-2.70053	-3.56001	-7.04394	-3.40807	-3.45009	1.93	0.057914	S179,S181,T187
R.G(ac)PPS(phos)PPAPVLHS(phos)PSR.K	M9PGQ6	Bx42	Bx42 isoform B OS=Drosophila melanogaster OX=7227 GN=Bx42 PE=4 SV=1	-1.28694	-1.17716	-1.30987	-4.5664	-0.423904	-1.86055	-8.49424	-5.29664	1.93	0.319762	S228,S236
R.RQQS(phos)ANSSNSTPVR.K	Q9V4P1	scra	Anillin OS=Drosophila melanogaster OX=7227 GN=scra PE=1 SV=3	-7.34773	-8.15761	-8.47119	-8.12427	-9.82898	-10.3109	-10.0837	-9.58401	1.93	0.000269521	S778
R.T(phos)PPVGGSPQLLAMGSNEFAPTR.N	Q9VXU1	Gmap	Golgi microtubule-associated protein isoform B OS=Drosophila melanogaster OX=7227 GN=Gmap PE=1 SV=2	-2.8603	-4.45829	-2.82446	-3.87229	-9.90824	-4.56207	-3.68127	-3.58203	1.93	0.215715	T1175
K.ES(phos)KPDIESPPKNYRPAEVNSVGGLVVGSTDESK.D	Q5U156	row	RE01954p OS=Drosophila melanogaster OX=7227 GN=row PE=1 SV=1	-3.25204	-3.63085	-7.61343	-7.25263	-7.38531	-7.41236	-7.0692	-7.55528	1.92	0.112717	S182
K.KWSLEDES(phos)EEDDSNPAPPLDSGKK.D	C5I7D5	CG6227	Uncharacterized protein OS=Drosophila melanogaster OX=7227 GN=CG6227 PE=4 SV=1	1.14684	-1.45917	-1.9529	-0.673396	-1.24517	-10.5647	0.443002	0.737013	1.92	0.467246	S235
K.EGGDGDVSMS(phos)PPC(cam)QK.V	M9PB57	Wee1	Wee1-like protein kinase OS=Drosophila melanogaster OX=7227 GN=Wee1 PE=3 SV=1	0.711736	0.556843	0.379156	0.415615	-2.57334	-2.09833	-1.66018	0.729784	1.92	0.0254607	S88
K.SPT(phos)SPC(cam)TAFETK.V	Q9VK43	A16	A16 OS=Drosophila melanogaster OX=7227 GN=A16 PE=2 SV=1	2.03746	2.83768	2.22484	2.10291	3.09628	-0.781074	-0.0382987	-0.735839	1.92	0.0603441	T101
R.S(phos)IGS(phos)ARNPGNGS(phos)PEPPPPPPR.N	A0A0B4K7H9	Dscam1	Down syndrome cell adhesion molecule 1 isoform BI OS=Drosophila melanogaster OX=7227 GN=Dscam1 PE=1 SV=1	-2.65778	-2.02374	-2.28178	-3.09663	-5.06578	-3.98854	-4.63609	-4.00939	1.91	0.000786817	S1928,S1931,S1939
R.SS(phos)VS(phos)PVNVSSK.Q	P28167	zfh2	Zinc finger protein 2 OS=Drosophila melanogaster OX=7227 GN=zfh2 PE=1 SV=2	-3.86715	-3.4203	-2.39137	-3.00768	-2.91438	-4.51624	-2.85438	-10.0282	1.91	0.262666	S2750,S2752
R.KSSS(phos)PKPGAMPSLK.L	A8DYI2	Ttd14	TRPL translocation defect 14 isoform C OS=Drosophila melanogaster OX=7227 GN=Ttd14 PE=1 SV=1	-5.09167	-5.81142	-5.74253	-6.24578	-10.0435	-5.85914	-9.74097	-4.88447	1.91	0.162028	S43
R.GGGGGS(phos)GSNLNEQ(d)TAEDGQAQQQQQPR.N	A0A0H4XWW0	bel-RB	FI24601p1 OS=Drosophila melanogaster OX=7227 GN=bel-RB PE=2 SV=1	-6.32282	-7.09447	-8.62795	-9.32304	-9.56795	-9.07298	-10.05	-10.2698	1.9	0.0264168	S178
R.SNS(phos)LEEDRPK.K	X2JD52	Dmel\CG11929	Uncharacterized protein isoform B OS=Drosophila melanogaster OX=7227 GN=Dmel\CG11929 PE=4 SV=1	-5.009	-5.53067	-4.85838	-5.07924	-4.64571	-9.41218	-3.89716	-10.1045	1.9	0.234664	S639
R.EMIDADDS(phos)NEPLSSIR.T	A0A0B4KEK1	E(Pc)	Enhancer of polycomb-like protein OS=Drosophila melanogaster OX=7227 GN=E(Pc) PE=1 SV=1	0.711736	0.66155	0.620094	-2.12432	-10.117	0.636509	1.53702	0.201954	1.9	0.482636	S821
R.SPT(phos)AGHDFN(d)GSSTTPGYANQGS(phos)LPR.Q	Q9GSE0	Pax	Focal contact protein paxillin OS=Drosophila melanogaster OX=7227 GN=Pax PE=2 SV=1	-0.23401	-1.67407	-0.592071	-0.609663	-1.97504	-4.13886	-3.48311	-1.12913	1.9	0.0285276	T72,S91
R.S(phos)RS(phos)PS(phos)PQVFNPR.K	M9PB57	Wee1	Wee1-like protein kinase OS=Drosophila melanogaster OX=7227 GN=Wee1 PE=3 SV=1	-9.29511	-1.33307	-0.768324	-0.714708	-7.21286	-5.03677	-5.75266	-1.66393	1.89	0.414805	S24,S26,S28
R.RRDS(phos)DQS(phos)PPRR.R	Q9VC60	anon-WO0118547.376	GH07383p OS=Drosophila melanogaster OX=7227 GN=anon-WO0118547.376 PE=2 SV=1	-0.339506	-2.02374	-0.34367	-1.54523	-9.27265	-0.268073	-0.368548	-1.89917	1.89	0.372017	S250,S253
K.HAS(phos)PIPER.K	Q86NM6	wts	SD19495p OS=Drosophila melanogaster OX=7227 GN=wts PE=2 SV=1	-4.09833	-3.97459	-3.84011	-3.99722	-4.67609	-4.06072	-10.2638	-4.48408	1.89	0.199688	S619
K.AEEDLES(phos)ETESHER.S	Q0E9B5	Dmel\CG8841	Uncharacterized protein isoform A OS=Drosophila melanogaster OX=7227 GN=Dmel\CG8841 PE=1 SV=1	-5.24093	-4.99786	-3.71677	-5.11419	-10.291	-6.0914	-6.02716	-4.23068	1.89	0.162487	S623
K.EQLAQLNGTAT(phos)LRSPR.K	Q9VTY8	sti	Non-specific serine/threonine protein kinase OS=Drosophila melanogaster OX=7227 GN=sti PE=1 SV=2	-5.37948	-6.92783	-4.61863	-4.51101	-7.98674	-7.90837	-8.94468	-4.15594	1.89	0.126171	T1321
K.TKQELLEYIDDGT(phos)EDDDEEEDFKR.R	Q9V6L0	Kdm4B	Probable lysine-specific demethylase 4B OS=Drosophila melanogaster OX=7227 GN=Kdm4B PE=3 SV=3	1.76143	-5.3719	-4.42638	2.24615	-4.89083	-5.1286	2.22182	-5.54892	1.89	0.47113	T452
R.ERVS(phos)QELIDC(cam)DIDFVEDTTSK.V	Q9W4C1	Dmel\CG15784	IP13321p OS=Drosophila melanogaster OX=7227 GN=Dmel\CG15784 PE=1 SV=1	-7.90259	-8.72428	-7.80121	-7.06314	-9.93246	-10.3833	-9.39938	-9.31235	1.88	0.0021703	S22
L.AIS(phos)PGMK.N	A4V402	MAPk-Ak2	LD26767p OS=Drosophila melanogaster OX=7227 GN=MAPk-Ak2 PE=1 SV=1	-7.07679	-7.31955	-6.6982	-6.63829	-9.91963	-8.43377	-6.66938	-10.2233	1.88	0.0426995	S229
K.MNSNTTGAT(phos)TSPTAAAK.L	Q8IPK8	Bsg25D	Blastoderm-specific gene 25D isoform C OS=Drosophila melanogaster OX=7227 GN=Bsg25D PE=4 SV=1	-0.384397	-0.862662	-1.42171	-0.798096	-3.04455	-3.40602	-0.870763	-3.65888	1.88	0.018983	T155
K.VNPPPPPRPAS(phos)PK.V	Q9VAY4	BOD1	Biorientation defective 1 isoform A OS=Drosophila melanogaster OX=7227 GN=BOD1 PE=1 SV=2	2.58957	-0.0443577	-0.432931	-1.19026	-9.9048	-1.50194	1.14022	3.72744	1.87	0.524299	S366
K.KAIKS(phos)ES(phos)EDEDWSK.G	Q9Y155	BcDNA.GH03108	BcDNA.GH03108 OS=Drosophila melanogaster OX=7227 GN=BcDNA.GH03108 PE=2 SV=1	1.07759	2.31449	0.894784	0.843243	-8.92896	0.117562	2.36754	4.08696	1.87	0.502312	S408,S410
R.RS(phos)SEDANEAFSK.E	Q9VID9	BEST:LD19244	Uncharacterized protein isoform B OS=Drosophila melanogaster OX=7227 GN=BEST:LD19244 PE=1 SV=3	-7.6214	-2.13416	-1.99554	-4.43908	-9.58673	-3.15495	-2.26496	-8.63369	1.86	0.398887	S1043
K.LDGLSS(phos)PK.L	A0A0B4LGG4	Sesn	Sestrin isoform D OS=Drosophila melanogaster OX=7227 GN=Sesn PE=4 SV=1	-3.05393	-3.49693	-3.52791	-3.49685	-5.06076	-2.99909	-3.22354	-9.72326	1.86	0.23273	S156
R.RNS(phos)DDMVIDDSLS(phos)KEHDPK.I	M9PHL0	e(y)3	Enhancer of yellow 3 isoform B OS=Drosophila melanogaster OX=7227 GN=e(y)3 PE=4 SV=1	0.136609	0.996041	0.504649	0.96161	-1.37151	-2.89462	-1.98777	1.40581	1.86	0.0688769	S518,S528
K.NKS(phos)LVLAPR.D	Q8IN55	CG15684	Oxysterol-binding protein OS=Drosophila melanogaster OX=7227 GN=CG15684 PE=1 SV=1	-4.32961	-3.89898	-3.52255	-4.5227	-4.36031	-4.53041	-4.7491	-10.0596	1.86	0.187852	S519
K.KPPKPTDSPS(phos)T(phos)PAAQSGGTGR.G	Q5U156	row	RE01954p OS=Drosophila melanogaster OX=7227 GN=row PE=1 SV=1	-6.94388	-2.00031	-6.25536	-5.97559	-6.58544	-7.4019	-7.98116	-6.6274	1.86	0.124118	S91,T92
R.QSKPGDIPLNTSGS(phos)SSR.N	A0A0B4K6Y7	pyd	Polychaetoid isoform O OS=Drosophila melanogaster OX=7227 GN=pyd PE=1 SV=1	-3.25362	-3.25174	-3.04982	-3.36823	-3.91099	-3.63939	-3.52367	-9.26574	1.85	0.188048	S1311
R.ASS(phos)PGDDYIDVEGHGGHASSSNSIHR.S	P51123	Taf1	Transcription initiation factor TFIID subunit 1 OS=Drosophila melanogaster OX=7227 GN=Taf1 PE=1 SV=3	-2.36434	-2.40706	-3.24911	-2.5434	-2.46165	-2.75501	-3.02718	-9.73177	1.85	0.284994	S1741
K.TYVS(phos)PALR.Y	A0A0B4LGI9	anon-EST:fe2C9	Uncharacterized protein isoform D OS=Drosophila melanogaster OX=7227 GN=anon-EST:fe2C9 PE=1 SV=1	-1.71361	-1.59297	-1.4093	-1.49638	-1.77687	-1.71999	-5.1301	-5.00278	1.85	0.0723368	S175
M.A(ac)TVQMKPDYAAS(phos)EVYS(phos)TASEPPPAYKR.Q	X2JCI8	Msr-110	Msr-110 isoform D OS=Drosophila melanogaster OX=7227 GN=Msr-110 PE=1 SV=1	-0.182132	-3.07001	-3.27589	-2.78015	-3.5233	-3.44574	-5.60351	-4.11788	1.85	0.0552217	S22,S26
K.EQKPS(phos)EQVEQK.S	Q9VR91	HERC2	Probable E3 ubiquitin-protein ligase HERC2 OS=Drosophila melanogaster OX=7227 GN=HERC2 PE=1 SV=3	1.5786	1.28538	1.16054	0.978988	0.921393	0.298738	-0.870763	-2.76306	1.85	0.0428642	S2499
M(ox)(ac)DVAPAPPASSGGDHST(phos)QQAPISPNQNANQAPVALAK.A	Q9VPM7	Dmel\CG17078	IP13529p OS=Drosophila melanogaster OX=7227 GN=Dmel\CG17078 PE=1 SV=2	-2.26505	-2.5359	-3.06271	-3.55569	-3.04455	-2.91306	-10.3785	-2.48224	1.85	0.323222	T18
R.T(phos)TTATSASGVPEYNTLDEPIRETVLR.D	Q9VQZ0	Dmel\CG3652	Protein YIPF OS=Drosophila melanogaster OX=7227 GN=Dmel\CG3652 PE=1 SV=2	-3.24099	-3.60942	-4.03726	-3.66806	-3.41688	-4.26346	-9.46754	-4.82195	1.85	0.17942	T29
R.KKESDLPEADQT(phos)SPS(phos)PIKQK.L	Q9W5C2	TRAM	Translocating chain-associated membrane protein OS=Drosophila melanogaster OX=7227 GN=TRAM PE=1 SV=1	-6.3497	-3.8354	-4.88562	-5.15001	-9.81931	-5.61017	-5.23595	-6.94067	1.85	0.124219	T359,S362
M.S(ac)KKPT(phos)AGPALHK.V	Q962I2	Rala	RAL2 OS=Drosophila melanogaster OX=7227 GN=Rala PE=1 SV=1	-2.15724	-2.25374	-2.07823	-3.61495	-9.33667	-2.46925	-2.78884	-2.91793	1.85	0.268293	T7
R.HAS(phos)LESN(d)GN(d)AVVASGSSAHSTPTQR.Q	Q9V3C5	Rich	Guanine nucleotide exchange factor subunit Rich OS=Drosophila melanogaster OX=7227 GN=Rich PE=1 SV=1	-3.23158	3.99157	3.46832	3.47919	3.14121	-2.14116	2.92307	-3.55918	1.84	0.434	S1392
R.RS(phos)PPPPR.S	Q94901	lark	RNA-binding protein lark OS=Drosophila melanogaster OX=7227 GN=lark PE=1 SV=1	-3.30695	-10.2669	-3.43612	-4.66229	-5.82131	-3.73786	-10.2181	-9.26414	1.84	0.393196	S301
R.S(ac)LGAN(d)S(phos)STDNVDGKK.E	P40797	pnut	Protein peanut OS=Drosophila melanogaster OX=7227 GN=pnut PE=1 SV=2	-5.93923	-5.52397	-5.77612	-5.94381	-5.77127	-5.45081	-10.3043	-9.01289	1.84	0.137307	S523
K.N(d)GASS(phos)PSKVPNNK.H	Q9I7F7	Ack-like	Activated Cdc42 kinase-like OS=Drosophila melanogaster OX=7227 GN=Ack-like PE=1 SV=3	0.660037	-1.52035	0.0165457	-0.137559	-2.5823	-2.1853	-1.85726	-1.6754	1.83	0.0058025	S118
R.EEGGGDQEAS(phos)ADEEDAKNNSGGGSPR.V	X2JKW3	Dmel\CG8611	Uncharacterized protein isoform C OS=Drosophila melanogaster OX=7227 GN=Dmel\CG8611 PE=4 SV=1	-4.06733	-3.25174	-3.28644	-4.13998	-3.78565	-4.26583	-9.68989	-4.34082	1.83	0.197414	S211
K.SVS(phos)PTTAATSSSPVKC(cam)PASTPNVDC(cam)R.V	Q494L6	eIF2B-delta	RE55357p OS=Drosophila melanogaster OX=7227 GN=eIF2B-delta PE=2 SV=1	-5.64481	-5.31876	-6.69659	-8.63131	-7.1842	-10.0744	-10.0178	-6.34748	1.83	0.142335	S213
R.EVQDIMSNSVVENAS(phos)QEDDQLEQELR.E	Q9Y124	BcDNA.GH08385	BcDNA.GH08385 OS=Drosophila melanogaster OX=7227 GN=BcDNA.GH08385 PE=1 SV=1	-5.44318	-5.91277	-5.9473	-6.08691	-9.86355	-5.09033	-10.3472	-5.40959	1.83	0.197629	S382
K.NQQS(phos)PQ(d)FVIEIHYDNEDLK.F	Q9VWK5	Ulp1	GH15225p OS=Drosophila melanogaster OX=7227 GN=Ulp1 PE=1 SV=1	-4.3981	-6.0894	-6.24357	-6.79961	-6.31186	-6.52975	-10.1262	-7.90101	1.83	0.0888849	S497
Y.DPESTPVRKSST(phos)SSM(ox)PASPAAWQLDVGDDDMR.S	H6WS59	Patronin	Patronin (Fragment) OS=Drosophila melanogaster OX=7227 GN=Patronin PE=2 SV=1	-3.19456	-4.5885	-2.81352	-3.38414	-4.08346	-9.85902	-3.80171	-3.55918	1.83	0.238425	T600
K.NLLTQLRQEES(phos)EEETIPR.K	Q9VID9	BEST:LD19244	Uncharacterized protein isoform B OS=Drosophila melanogaster OX=7227 GN=BEST:LD19244 PE=1 SV=3	-3.40222	-5.66423	-4.64943	-3.36647	-7.08102	-5.74242	-4.17009	-7.36894	1.82	0.0663882	S1006
M.S(ac)EPEVTSVVDMKS(phos)PNISSSC(cam)SFFK.L	Q8T0S6	hpo	Serine/threonine-protein kinase hippo OS=Drosophila melanogaster OX=7227 GN=hpo PE=1 SV=1	-5.73053	-3.07001	-6.67426	-2.60421	-5.14853	-4.66145	-8.61889	-6.93625	1.82	0.17988	S15
R.S(phos)AGS(phos)VGRR.S	M9PC85	x16	X16 splicing factor isoform B OS=Drosophila melanogaster OX=7227 GN=x16 PE=1 SV=1	-2.59613	-2.62268	-3.18427	-2.81566	-3.04455	-3.38014	-3.46837	-8.58673	1.82	0.178003	S168,S171
K.KVESSSEDS(phos)SSEEEPAKPAVK.A	M9PFZ1	Nopp140	Nopp140 isoform E OS=Drosophila melanogaster OX=7227 GN=Nopp140 PE=1 SV=1	-3.78002	-3.43751	-4.48072	-4.10441	-4.74686	-4.44743	-9.51872	-4.38785	1.82	0.158547	S171
R.NGS(phos)AEGLPLEPILR.Q	Q9VPP0	Ent1	Equilibrative nucleoside transporter 1 isoform A OS=Drosophila melanogaster OX=7227 GN=Ent1 PE=2 SV=2	-3.17791	-3.44698	-3.04982	-3.36647	-2.84804	-3.24552	-4.29975	-9.91544	1.82	0.263395	S294
K.NGS(phos)VPAFNTR.V	Q9W0L6	Dmel\CG13907	GH22266p OS=Drosophila melanogaster OX=7227 GN=Dmel\CG13907 PE=1 SV=1	-5.35204	-4.77871	-5.23668	-5.19296	-5.64573	-6.09983	-10.3376	-5.76717	1.82	0.121724	S418
K.GLPVNDDS(phos)DEGK.V	Q494G7	MFS17	Major facilitator superfamily transporter 17 isoform F OS=Drosophila melanogaster OX=7227 GN=MFS17 PE=2 SV=1	0.135095	0.688836	0.293211	0.0168082	-8.80755	1.75056	0.961293	-0.0484228	1.82	0.441262	S486
K.QMAGGS(phos)TTGLATVPLSLEEK.Q	Q7KNF2	Pabp2	Polyadenylate-binding protein 2 OS=Drosophila melanogaster OX=7227 GN=Pabp2 PE=1 SV=1	-6.46106	-7.38845	-5.82801	-6.47644	-7.67931	-8.08443	-9.914	-7.7667	1.82	0.0149814	S77
K.QGAVSMN(d)GQNGTAEGS(phos)PQKYEEDR.E	P48591	RnrL	Ribonucleoside-diphosphate reductase large subunit OS=Drosophila melanogaster OX=7227 GN=RnrL PE=1 SV=2	-7.40578	-7.09051	-6.91678	-6.58013	-9.37125	-8.47358	-10.2372	-7.2057	1.82	0.0213453	S783
R.DEEGGINYS(phos)PGGR.V	Q9I7T7	Larp4B	La-related protein Larp4B OS=Drosophila melanogaster OX=7227 GN=Larp4B PE=1 SV=2	-6.91549	-6.95821	-6.29133	-6.75848	-9.58492	-6.89136	-7.54291	-10.1944	1.82	0.0432392	S851
K.DT(phos)SPSASIEGAGSSGNEAKS(phos)ADGDQQAGEK.G	A0A0B4K7Y7	larp	La related protein isoform G OS=Drosophila melanogaster OX=7227 GN=larp PE=1 SV=1	-7.7057	-8.00804	-8.18293	-8.17749	-10.1647	-8.66533	-10.5369	-9.98833	1.82	0.00265439	T219,S237
K.TAT(phos)PPKDEANAEQN(d)GGEPAANSGDK.M	Q9VUC1	Hsc70Cb	Hsc70Cb isoform A OS=Drosophila melanogaster OX=7227 GN=Hsc70Cb PE=1 SV=1	-2.23342	-0.933013	1.04509	-0.0345773	-3.82127	-2.96984	-1.21367	-1.42253	1.82	0.070901	T763
R.S(phos)RQSS(phos)VEQELLFSSELDIQHNIQK.T	Q9NBD7	chb	CLIP-associating protein OS=Drosophila melanogaster OX=7227 GN=chb PE=1 SV=1	-8.36284	-5.87819	-5.33337	-6.11024	-7.66097	-10.7465	-7.70205	-6.7961	1.81	0.112976	S1121,S1125
R.QSS(phos)SSPQPIPPILK.G	Q9VWE6	CG14215	Protein ELYS homolog OS=Drosophila melanogaster OX=7227 GN=CG14215 PE=1 SV=2	-3.77546	-5.38397	-5.03517	-5.55167	-9.8159	-5.40311	-6.00998	-5.75414	1.81	0.115941	S1160
K.S(phos)PGGREEGIEIFYFPDEPKEK.R	Q9VZX7	Atg2	Autophagy-related 2 isoform A OS=Drosophila melanogaster OX=7227 GN=Atg2 PE=2 SV=1	-3.42885	-4.16466	-3.49084	-4.78834	-3.49426	-9.70811	-3.47572	-6.44882	1.81	0.230194	S1230
K.KTINKEQDS(phos)DAES(phos)DHADSLLANK.S	Q9VYU0	rudhira	Rudhira isoform C OS=Drosophila melanogaster OX=7227 GN=rudhira PE=4 SV=3	-2.24915	-0.656313	-1.70534	-0.44071	0.246724	-1.08383	-0.882926	-10.5524	1.81	0.460658	S1284,S1288
R.S(phos)IEASVGSAYENVK.V	A0A0B4K7G1	Dmel\CG5174	Uncharacterized protein isoform N OS=Drosophila melanogaster OX=7227 GN=Dmel\CG5174 PE=1 SV=1	-4.50736	-3.71037	-3.79638	-4.2013	-3.76919	-5.50572	-4.5313	-9.65107	1.81	0.176746	S161
R.QS(phos)PEGVSATESEREDQPEEC(cam)LR.H	M9PHR5	Ect4	Ectoderm-expressed 4 isoform K OS=Drosophila melanogaster OX=7227 GN=Ect4 PE=1 SV=1	0.979766	1.02488	1.11116	1.071	0.864825	0.916551	-5.85628	1.01786	1.81	0.278874	S1630
K.VIETGTANDS(phos)TIDYDWVPQETLR.A	Q9W335	l(1)G0320	LD26546p OS=Drosophila melanogaster OX=7227 GN=l(1)G0320 PE=1 SV=1	-2.41667	-2.81368	-2.56396	-2.50424	-2.52071	-3.30516	-2.32343	-9.37628	1.81	0.275413	S246
K.ENGAADS(phos)SATEPTDAVDGEK.A	O16043	Df31	Anon1A4 OS=Drosophila melanogaster OX=7227 GN=Df31 PE=1 SV=1	-5.55604	-4.09104	-5.33963	-4.95259	-4.84266	-8.35994	-5.63608	-8.32542	1.81	0.0798569	S63
R.SVVS(phos)GSDNEEVAQ(d)EQIDPQIQAR.F	Q9Y1B4	Orc3	Origin recognition complex subunit 3 OS=Drosophila melanogaster OX=7227 GN=Orc3 PE=2 SV=1	-1.68125	-5.70153	-4.44315	-3.38236	-10.4264	-5.39272	-1.34547	-5.26857	1.81	0.363387	S674
R.SPS(phos)GESLNR.N	A1Z7A6	Asap	ArfGAP with SH3 domain ANK repeat and PH domain-containing protein OS=Drosophila melanogaster OX=7227 GN=Asap PE=1 SV=1	-0.52572	-1.76	-0.580434	-0.0172447	-3.01999	-5.1243	-0.952997	-1.01302	1.81	0.102917	S957
R.T(phos)PS(phos)PFLKPHER.L	Q6AWQ1	SRm160	RE71183p OS=Drosophila melanogaster OX=7227 GN=SRm160 PE=2 SV=1	-5.12031	-0.992452	-0.990548	-0.678836	-4.91327	-4.42873	-4.79617	-0.894341	1.81	0.206316	T670,S672
R.TFSSSS(phos)EPHQ	A0A0B4KG56	PEK	Pancreatic eIF-2alpha kinase isoform C OS=Drosophila melanogaster OX=7227 GN=PEK PE=4 SV=1	-2.06387	-2.19271	-3.44454	-2.28927	-4.77535	-3.87032	-3.04894	-5.5046	1.8	0.0165342	S1096
R.TLDDYDRYPVQTTS(phos)PVPTENPSLR.Y	Q9V8P9	Topors	E3 ubiquitin-protein ligase Topors OS=Drosophila melanogaster OX=7227 GN=Topors PE=1 SV=1	-2.7443	-2.65891	-2.41598	-2.55336	-1.68232	-2.65076	-2.85438	-10.3951	1.8	0.357942	S167
R.SMS(phos)LNNGAGSGGGAAATK.R	H0RNJ0	NC2alpha-RA	FI17839p1 (Fragment) OS=Drosophila melanogaster OX=7227 GN=NC2alpha-RA PE=2 SV=1	-2.19483	-0.726669	-0.180181	-1.26603	0.356303	-5.51696	0.116341	-6.51322	1.8	0.324338	S168
R.NHLSAGGGLNHSGPDS(phos)PQEPQDAGATLAIGYVR.E	Q4QQC1		RE07060p OS=Drosophila melanogaster OX=7227 PE=2 SV=1	-2.52739	-2.58734	-3.04982	-2.80373	-2.62796	-2.28385	-9.62679	-3.61257	1.8	0.289243	S22
K.ANQDS(phos)DTESPSVSYT(phos)PS(phos)PAKKPIVDALKDQDNEK.F	Q9VMV9	Rtnl1	Reticulon-like protein OS=Drosophila melanogaster OX=7227 GN=Rtnl1 PE=1 SV=2	-2.9997	0.237699	-1.84873	-1.10723	-0.994342	-1.17268	-9.92842	-0.841701	1.8	0.422346	S232,T242,S244
R.NS(phos)SLNYADFEYNMNSTPFDNIELK.T	Q9VHX1	Dmel\CG10435	LD44032p OS=Drosophila melanogaster OX=7227 GN=Dmel\CG10435 PE=1 SV=1	-0.867278	-0.283246	-1.56571	-1.14438	-3.71694	-1.93868	-3.36649	-2.00132	1.79	0.00861699	S179
R.KAKS(phos)PIIFNR.R	Q500Y6		SD07352p OS=Drosophila melanogaster OX=7227 PE=2 SV=1	-4.22015	-4.33007	-4.17049	-5.83291	-5.51645	-4.46365	-9.49678	-6.24366	1.79	0.132964	S271
R.S(phos)SELVFK.Q	Q8T051	CG4639	LD28458p OS=Drosophila melanogaster OX=7227 GN=CG4639 PE=2 SV=1	-1.37912	-1.14468	-1.48974	-0.957563	-0.554478	-1.30037	-10.2745	0.0124162	1.79	0.445165	S424
K.DIS(phos)PT(phos)KSDTTDN(d)VLNFVDVR.Q	B7Z0D7	Dmel\CG7504	Uncharacterized protein isoform B OS=Drosophila melanogaster OX=7227 GN=Dmel\CG7504 PE=4 SV=1	0.962798	0.122354	1.06003	1.37	-1.81333	-2.70596	0.152543	0.729784	1.79	0.0556362	S691,T693
K.SLVLAPRDT(phos)NS(phos)DSSQSPQGAVK.R	Q8IN55	CG15684	Oxysterol-binding protein OS=Drosophila melanogaster OX=7227 GN=CG15684 PE=1 SV=1	-3.47619	-2.76351	-2.99936	-2.33149	-10.0391	-2.62773	-2.70872	-3.33647	1.79	0.313525	T527,S529
R.GRS(phos)FDSEPATVEDK.V	A1Z9J3	shot	Short stop isoform H OS=Drosophila melanogaster OX=7227 GN=shot PE=1 SV=1	-5.08037	-4.21232	-2.95061	-4.24259	-10.2912	-4.70577	-4.14644	-4.46803	1.78	0.241584	S2434
K.QKS(phos)PVHS(phos)PTR.K	O62528	pav	Kinesin-like protein OS=Drosophila melanogaster OX=7227 GN=pav PE=2 SV=1	-3.09598	-0.329946	-2.98702	-0.561132	-5.50959	-3.68145	-3.1278	-1.78295	1.78	0.112616	S836,S840
R.FADPTIEETQHHDS(phos)QNDEK.R	Q8MLQ5	kcc	Kazachoc isoform D OS=Drosophila melanogaster OX=7227 GN=kcc PE=1 SV=1	-6.54711	-5.8361	-6.07733	-6.73472	-8.84561	-7.77287	-8.18194	-7.49768	1.78	0.00136438	S956
K.SST(phos)SSMPASPAAWQLDVGDDDMR.S	H6WS59	Patronin	Patronin (Fragment) OS=Drosophila melanogaster OX=7227 GN=Patronin PE=2 SV=1	-7.13639	-7.10643	-5.10814	-5.45889	-6.10143	-10.454	-5.41087	-9.97182	1.78	0.205641	T600
R.NSS(phos)QSVSEDEILK.T	A0A0B4KGL8	Dmel\CG7029	Uncharacterized protein isoform F OS=Drosophila melanogaster OX=7227 GN=Dmel\CG7029 PE=4 SV=1	-3.59378	-3.96322	-3.24176	-4.11322	-4.88195	-2.68997	-7.51356	-6.89276	1.77	0.123816	S1225
R.M(ox)QQRS(phos)PS(phos)PEAPPEPK.E	Q960X8	Hrs	Hepatocyte growth factor-regulated tyrosine kinase substrate OS=Drosophila melanogaster OX=7227 GN=Hrs PE=1 SV=1	-3.02656	-2.6049	-4.14284	-3.03533	-3.91099	-3.34216	-3.29975	-9.35658	1.77	0.235162	S301,S303
R.VLLYSTQS(phos)PR.L	B5RJK8	CG16833-RB	AT03470p OS=Drosophila melanogaster OX=7227 GN=CG16833-RB PE=2 SV=1	-4.07291	-4.13885	-3.93651	-4.73297	-4.66082	-4.69297	-10.0539	-4.54169	1.77	0.198501	S411
R.LHIS(phos)PSVAHK.R	Q7K2D2	DCTN2-p50	Dynactin subunit 2 OS=Drosophila melanogaster OX=7227 GN=DCTN2-p50 PE=1 SV=1	-6.91549	-7.94585	-7.24328	-7.0518	-10.5837	-6.94045	-9.78505	-8.93013	1.77	0.049723	S50
K.AAAGAAGSSERDS(phos)T(phos)SPDAKPLPPHLDLANLSHVLSAENMAK.L	X2JDA8	su(sable)	Suppressor of sable isoform B OS=Drosophila melanogaster OX=7227 GN=su(sable) PE=4 SV=1	-0.341612	-2.83425	-1.89988	-0.234373	-0.541312	-1.70786	-9.49294	-0.661723	1.77	0.411557	S525,T526
K.SEDT(phos)PDNTVSLSEPTT(phos)SQRR.E	B7Z0I8	CG14896	Uncharacterized protein OS=Drosophila melanogaster OX=7227 GN=CG14896 PE=1 SV=1	-8.98258	-7.91047	-8.62795	-4.82648	-10.47	-10.3372	-5.8259	-10.8113	1.77	0.23869	T3202,T3214
K.TPT(phos)KAAAPAAVAS(phos)PAA.A	M9NG39	Pep	Protein on ecdysone puffs isoform D OS=Drosophila melanogaster OX=7227 GN=Pep PE=1 SV=1	-3.61808	-2.82393	-3.19843	-3.29121	-10.0016	-3.50046	-3.49202	-3.03125	1.77	0.282627	T641,S651
K.EEGAGSTSSGVATS(phos)PR.Q	A0A0B4LF82	Sin3A	Sin3A isoform H OS=Drosophila melanogaster OX=7227 GN=Sin3A PE=1 SV=1	-7.07455	-6.5274	-5.39727	-7.28412	-7.54712	-7.64901	-10.8502	-7.28783	1.76	0.0799004	S1451
K.S(ac)KKPVAGS(phos)S(phos)FEK.R	M9PB57	Wee1	Wee1-like protein kinase OS=Drosophila melanogaster OX=7227 GN=Wee1 PE=3 SV=1	1.26921	0.809758	1.01472	1.10305	-1.80807	-1.44381	-1.03477	1.43277	1.76	0.0356222	S278,S279
R.NINDEDLTS(phos)PLKELN(d)GQSPVQLSVDEIVAAMNSEDQER.Q	P52295	Pen	Importin subunit alpha OS=Drosophila melanogaster OX=7227 GN=Pen PE=1 SV=2	-6.81655	-7.47624	-7.43384	-8.11009	-9.95544	-10.6728	-8.07806	-8.18241	1.76	0.0289765	S57
R.RT(phos)SKGS(phos)LS(phos)PSYKRPAVDK.R	X2JE07	Dmel\CG1677	Uncharacterized protein isoform D OS=Drosophila melanogaster OX=7227 GN=Dmel\CG1677 PE=1 SV=1	-5.65315	-4.80283	-5.27819	-7.14993	-10.7294	-10.2831	-4.5191	-4.38283	1.76	0.323726	T800,S804,S806
R.SS(phos)LT(phos)PTPTPMR.Q	Q9VU76	cmb	Combover isoform A OS=Drosophila melanogaster OX=7227 GN=cmb PE=1 SV=2	-3.54831	-4.65281	-3.2925	-2.99405	-6.08096	-1.9867	-10.1009	-3.33647	1.75	0.325563	S645,T647
R.TQFVDPNADDEDLVNDGLGET(phos)PVSER.F	Q7YU20	rb	AP-3 complex subunit beta OS=Drosophila melanogaster OX=7227 GN=rb PE=2 SV=1	-3.90652	-5.05465	-5.04537	-5.55968	-9.56597	-6.29883	-5.19171	-5.52106	1.75	0.112911	T256
M.APALTAEPLS(phos)PK.E	E1JIM0	nsl1	Non-specific lethal 1 isoform E OS=Drosophila melanogaster OX=7227 GN=nsl1 PE=1 SV=1	-0.574429	-0.826155	-0.673793	-0.531301	-10.0192	0.706125	0.659732	-0.925958	1.74	0.479243	S12
R.TTPTELS(phos)PEER.D	Q9VM49	Caper	Caper isoform A OS=Drosophila melanogaster OX=7227 GN=Caper PE=1 SV=1	-7.31823	-6.25699	-7.18799	-6.63153	-9.29829	-9.74371	-8.21304	-7.103	1.74	0.0215902	S231
K.STINST(phos)SPPATPSSSAS(phos)PGSTLTTR.K	Q7K4C7	Pcyt1	LD46058p OS=Drosophila melanogaster OX=7227 GN=Pcyt1 PE=1 SV=1	-2.68962	-2.94173	-2.8919	-2.80373	-3.28668	-3.00897	-3.03802	-8.93766	1.74	0.23213	T16,S27
K.N(d)GTSGGS(phos)PVGGNR.N	Q7YZA2	CG7065	Uncharacterized protein CG7065 OS=Drosophila melanogaster OX=7227 GN=CG7065 PE=1 SV=1	-3.27279	-7.12456	-3.41447	-3.43847	-3.77739	-10.5241	-5.99301	-3.86582	1.73	0.335174	S1069
R.NVNISC(cam)KPLTVTQGEQC(cam)S(phos)PDVR.D	A0A0B4KHZ0	woc	Without children isoform E OS=Drosophila melanogaster OX=7227 GN=woc PE=1 SV=1	-5.66999	-8.52388	-8.69062	-5.76653	-8.85253	-9.87006	-7.57791	-9.28648	1.73	0.0902759	S1146
K.RRS(phos)T(phos)GSINSLKK.L	M9PCT8	Abl	Abl tyrosine kinase isoform C OS=Drosophila melanogaster OX=7227 GN=Abl PE=1 SV=1	-4.53023	-4.31554	-4.47382	-4.94733	-4.71104	-5.72277	-4.76342	-10.0066	1.73	0.175652	S1418,T1419
R.SNS(phos)PFEILR.Q	X2JFM8	Dmel\CG16952	Uncharacterized protein isoform E OS=Drosophila melanogaster OX=7227 GN=Dmel\CG16952 PE=4 SV=1	-4.18645	-4.64189	-4.21011	-4.32892	-9.80705	-4.93906	-4.98881	-4.55293	1.73	0.173323	S984
K.YSS(phos)TDS(phos)LKSEK.R	Q9XZ21	snama	Something that sticks like glue isoform A OS=Drosophila melanogaster OX=7227 GN=snama PE=1 SV=1	-4.17138	-4.49384	-4.85838	-5.09079	-8.65206	-6.35823	-5.15349	-5.33493	1.72	0.0579006	S1203,S1206
R.QHDLSQFGLTEIPDDFDPSAGYGEDDGGDS(phos)DLEAELAAITGGEGAKPKPKPK.A	Q9VKJ9	l(2)gd1	Coiled-coil and C2 domain-containing protein 1-like OS=Drosophila melanogaster OX=7227 GN=l(2)gd1 PE=1 SV=1	-2.20246	-2.88699	-4.25973	-3.09954	-2.88083	-2.80579	-10.2108	-3.43701	1.72	0.339362	S44
K.QVIAAEAAAALLAASTTPQHHHVAEDENENEEELTNGDAGGDVS(phos)R.D	M9NG50	Moe	Moesin isoform L OS=Drosophila melanogaster OX=7227 GN=Moe PE=1 SV=1	-7.15287	-7.40805	-7.53658	-7.55797	-9.50009	-8.46485	-8.58798	-9.99012	1.72	0.00210737	S494
R.AKYNQQNS(phos)SNLNAC(cam)M(ox)GSTDPNKVVEK.I	Q9VI56	Dmel\CG1943	GEO05313p1 OS=Drosophila melanogaster OX=7227 GN=Dmel\CG1943 PE=1 SV=1	-8.3091	-8.14522	-9.103	-8.4717	-10.2869	-9.42434	-9.5649	-11.6202	1.72	0.0116245	S52
R.ES(phos)KSPAPLTSAAQ(d)NNALVN(d)NSHSK.L	E8NH12	alpha-Adaptin-RB	AP-2 complex subunit alpha OS=Drosophila melanogaster OX=7227 GN=alpha-Adaptin-RB PE=2 SV=1	-3.31521	-4.5236	-4.51222	-4.75578	-5.52333	-5.18127	-9.57856	-3.70672	1.72	0.188849	S645
K.S(phos)KEAAALK.G	Q6AWQ1	SRm160	RE71183p OS=Drosophila melanogaster OX=7227 GN=SRm160 PE=2 SV=1	-3.30366	-4.00691	-3.74352	-3.76888	-9.60559	-3.85242	-3.95556	-4.29764	1.72	0.219501	S773
K.VES(phos)DPES(phos)DIKDDSMSNITGEK.S	Q9VCH1	eIF4G2	Eukaryotic translation initiation factor 4G2 isoform A OS=Drosophila melanogaster OX=7227 GN=eIF4G2 PE=1 SV=2	-2.51783	-2.43821	-2.05228	-1.30335	-2.79499	-3.35471	-6.43357	-2.62322	1.72	0.0831062	S935,S939
R.S(phos)FEPMDIN.Q	Q9NHF8		Gag protein OS=Drosophila melanogaster OX=7227 PE=4 SV=1	-5.56389	-5.77121	-5.56326	-5.60039	-9.83052	-7.1946	-6.66938	-5.65392	1.71	0.0740623	S289
K.SANGSNAVTPTT(phos)SANTS(phos)PISGR.A	M9PB54	homer	Homer isoform F OS=Drosophila melanogaster OX=7227 GN=homer PE=1 SV=1	1.45056	2.10765	1.98355	1.50208	0.320693	0.423395	-0.0796949	-0.461456	1.71	0.000374418	T131,S136
R.HS(phos)GS(phos)DDNEKGDDAGSGSGSSETEVVTK.N	Q9VPB8	Pex14	Peroxin 14 OS=Drosophila melanogaster OX=7227 GN=Pex14 PE=1 SV=1	-4.33631	-3.17104	-2.70846	-3.8698	-6.34808	-4.98904	-4.51304	-5.02608	1.7	0.0113615	S247,S249
R.KS(phos)ST(phos)PVKPILATPK.S	B7YZW8	CLIP-190	Cytoplasmic linker protein 190 isoform S OS=Drosophila melanogaster OX=7227 GN=CLIP-190 PE=1 SV=2	-4.17739	-4.48731	-4.50164	-4.81685	-5.23633	-5.21291	-9.38991	-4.93872	1.7	0.126956	S353,T355
K.YNQQNS(phos)SNLNAC(cam)MGSTDPNK.V	Q9VI56	Dmel\CG1943	GEO05313p1 OS=Drosophila melanogaster OX=7227 GN=Dmel\CG1943 PE=1 SV=1	-6.51938	-6.63877	-6.52975	-6.7311	-8.28138	-7.96881	-9.07435	-7.90676	1.7	0.000465219	S52
M(ac)DTEKS(phos)SS(phos)SSFEDLTNAEDTK.D	Q7K3D4	zda	Peptidylprolyl isomerase OS=Drosophila melanogaster OX=7227 GN=zda PE=1 SV=1	-8.37937	-6.39684	-6.55285	-5.79461	-7.88745	-9.21219	-8.97344	-7.85021	1.7	0.0271383	S7,S9
R.SGATPT(phos)PPSVGSTSPYSAK.S	Q9VHC4	Dmel\CG8176	Uncharacterized protein isoform A OS=Drosophila melanogaster OX=7227 GN=Dmel\CG8176 PE=1 SV=3	-3.9755	-3.48713	-3.12898	-3.63384	-6.98854	-2.86739	-7.02367	-4.1389	1.7	0.122168	T1119
K.ATNDAQDTS(phos)VTDEK.S	B7Z0I8	CG14896	Uncharacterized protein OS=Drosophila melanogaster OX=7227 GN=CG14896 PE=1 SV=1	-6.40219	-6.80745	-6.0669	-6.52735	-9.6961	-7.51678	-7.43353	-7.90676	1.69	0.0133171	S1370
R.GNS(phos)PVITQN(d)GLK.N	Q86NM6	wts	SD19495p OS=Drosophila melanogaster OX=7227 GN=wts PE=2 SV=1	-4.38762	-6.19184	-4.19868	-5.05074	-5.7229	-9.83104	-5.17726	-5.84793	1.69	0.155356	S247
R.GAISS(phos)GDEESTSSR.K	Q6AWQ1	SRm160	RE71183p OS=Drosophila melanogaster OX=7227 GN=SRm160 PE=2 SV=1	-2.82451	-3.59531	-3.28795	-3.8065	-10.8106	-3.40602	-2.88341	-3.17581	1.69	0.366776	S806
K.A(ac)LGGIVLT(phos)ASHN(d)PGGPENDFGIK.F	Q9VUY9	Pgm	Phosphoglucomutase OS=Drosophila melanogaster OX=7227 GN=Pgm PE=1 SV=1	-6.93775	-7.64911	-5.4573	-5.87226	-7.265	-7.98433	-10.3468	-7.09312	1.69	0.0790848	T115
R.KLST(phos)SS(phos)VEETAAAAVSEETPSK.D	C0P8M5	Nop60B-RC	MIP05689p (Fragment) OS=Drosophila melanogaster OX=7227 GN=Nop60B-RC PE=2 SV=1	-5.17936	-5.04024	-5.39727	-5.21808	-5.34195	-8.31609	-8.72139	-5.22297	1.69	0.0899562	T470,S472
M.VLT(phos)PTKDGPDQESMPLPADN(d)GES(phos)PSKQQAPVNRDEMHYLDLLR.H	Q541C9	Ts	RE18955p OS=Drosophila melanogaster OX=7227 GN=Ts PE=1 SV=1	-4.44443	-4.64552	-3.56412	-3.78053	-4.06576	-4.69935	-4.4451	-9.97842	1.69	0.233605	T5,S25
K.SPT(phos)AAIKEEPGQEPLEGTPTPSKK.R	Q9VNI5	Dmel\CG10979	LD10772p OS=Drosophila melanogaster OX=7227 GN=Dmel\CG10979 PE=1 SV=1	-1.19267	-1.1319	-2.48373	-3.11421	-9.87652	-0.811021	-2.80726	-1.13968	1.68	0.423464	T649
R.GGGGGGGGGGGGGGSSGVGADGTGLGT(phos)PGTR.T	Q9W002	msn	Misshapen isoform A OS=Drosophila melanogaster OX=7227 GN=msn PE=1 SV=3	-7.4604	-7.37875	-7.29104	-7.81734	-10.4985	-8.34784	-9.51904	-8.29114	1.68	0.0125021	T990
R.SLS(phos)PTTR.A	Q9VWN4	Flacc	Fl(2)d-associated complex component OS=Drosophila melanogaster OX=7227 GN=Flacc PE=1 SV=1	1.08545	2.72578	1.7174	1.44069	1.88914	1.93585	-4.30759	0.758483	1.67	0.266896	S158
R.SSS(phos)VKT(phos)PDVAAVSPPAFK.E	Q9VC62	Esyt2	Extended synaptotagmin-like protein 2 isoform A OS=Drosophila melanogaster OX=7227 GN=Esyt2 PE=1 SV=1	0.562037	-0.578345	-0.562008	-0.521493	-1.16221	-2.01132	-1.89618	-2.72283	1.67	0.00426891	S605,T608
R.QALVNDGDADDDGASS(phos)VDWNDVDEEQGER.L	Q24034	Mybbp1A	Lethal(1)1Bi protein OS=Drosophila melanogaster OX=7227 GN=Mybbp1A PE=4 SV=1	-3.70869	-2.82393	-2.81352	-2.45674	-3.06953	-3.36737	-5.17726	-6.88563	1.67	0.0883383	S791
R.QLPLGSGPAGT(phos)PPGNR.T	Q961R5	CG8547	GH09468p OS=Drosophila melanogaster OX=7227 GN=CG8547 PE=2 SV=1	-2.41667	-1.7502	-1.74636	-2.88943	-4.60862	-3.98074	-2.88341	-3.99975	1.67	0.00597878	T347
K.SDNM(ox)DISNS(phos)P	O61646	Srp54	Splicing factor SRp54 OS=Drosophila melanogaster OX=7227 GN=Srp54 PE=2 SV=3	-5.89897	-5.8196	-5.41039	-5.84265	-9.57746	-6.76406	-6.68292	-6.56918	1.66	0.0443864	S513
K.SINQQQYLPIS(phos)SDDEDIEDEMKPRPTTAQ(d)LPSMPNMTEN(d)HTEPK.A	Q9VRP5	scny	Ubiquitin carboxyl-terminal hydrolase 36 OS=Drosophila melanogaster OX=7227 GN=scny PE=1 SV=3	-4.68423	-5.08391	-5.36496	-4.146	-4.55825	-10.8075	-5.32872	-5.24104	1.66	0.25496	S615
R.IIIASPS(phos)DEEHDGKVQS(phos)NDDS(phos)SENKTEKPK.N	Q8INM3	sle	Protein slender lobes OS=Drosophila melanogaster OX=7227 GN=sle PE=1 SV=1	-6.47727	-3.94521	-4.25085	-9.88041	-10.2734	-9.4082	-5.6694	-5.84103	1.66	0.348029	S745,S755,S759
R.KESPSSSAAS(phos)S(phos)PTEK.Q	Q9V3E9	spag	FI17138p1 OS=Drosophila melanogaster OX=7227 GN=spag PE=1 SV=1	-2.72218	-2.5275	-7.64721	-2.41075	-2.74382	-2.99909	-6.82888	-9.38348	1.66	0.400735	S77,S78
R.DHITS(phos)PTMELVSGDR.K	Q7YU03	Dmel\CG3632	LD11744p OS=Drosophila melanogaster OX=7227 GN=Dmel\CG3632 PE=1 SV=1	-2.87243	-4.48081	-2.80267	-2.14676	-5.69154	-8.22849	-3.69664	-1.32296	1.66	0.277341	S892
K.HSWHNSLDTTETS(phos)C(cam)GEQTDKFFDVDTLK.S	B7YZY0	38D.30	Uncharacterized protein isoform C OS=Drosophila melanogaster OX=7227 GN=38D.30 PE=1 SV=1	-4.04794	-2.25374	-2.10465	-1.35903	-3.6457	-4.36388	-4.03802	-4.34815	1.66	0.0197584	S985
K.IYNSSGAHPST(phos)SPSLPAT(phos)PTSAPSTAQTSK.R	M9PDR5	spen	Split ends isoform F OS=Drosophila melanogaster OX=7227 GN=spen PE=1 SV=1	0.928249	-1.08493	-3.33254	-0.148839	-0.596979	0.140096	-9.65817	-0.164849	1.66	0.493952	T2761,T2768
K.YALQHS(phos)LEAEK.T	Q9VUR5	RhoGAP71E	LD04071p OS=Drosophila melanogaster OX=7227 GN=RhoGAP71E PE=1 SV=2	5.30556	0.225329	1.11832	1.23186	0.0418293	1.1116	-0.197787	0.341276	1.65	0.166504	S283
R.KNS(phos)SSN(d)C(cam)DN(d)SLSSSHQDR.H	A0A0B4KG97	fru	Fruitless isoform O OS=Drosophila melanogaster OX=7227 GN=fru PE=1 SV=1	-1.83893	-2.99863	-1.82108	-2.8277	-2.28302	-4.40766	-4.81842	-4.57855	1.65	0.0311053	S364
R.QS(phos)SGQFSKPAVPAMK.T	M9NEL3	kis	Kismet isoform F OS=Drosophila melanogaster OX=7227 GN=kis PE=1 SV=1	-1.55858	-2.26068	-2.50998	-3.25989	-4.42332	-3.95186	-4.30759	-3.49004	1.65	0.00392251	S3887
R.ASSIVHTRPSTPTVVTHTHDEDYS(phos)EEEETPSGAESSTEAVRDASED	Q7K571	CG6247	GH10029p OS=Drosophila melanogaster OX=7227 GN=CG6247 PE=2 SV=1	-1.35339	-0.597995	-2.50998	-1.33736	-1.44316	-9.35887	-0.373688	-1.22982	1.65	0.422549	S487
K.SVS(phos)VDDSGEEFSR.Y	Q24593	Rbcn-3A	Uncharacterized protein DmX OS=Drosophila melanogaster OX=7227 GN=Rbcn-3A PE=4 SV=1	-4.52257	-4.5746	-4.1817	-5.67671	-6.66392	-6.68587	-5.04893	-7.15686	1.65	0.0161943	S519
R.STSVSESELLS(phos)PVEEQPPK.Q	E2QC61	bin3	Bicoid-interacting protein 3 isoform B OS=Drosophila melanogaster OX=7227 GN=bin3 PE=1 SV=1	-1.30327	-2.25374	-1.36871	-0.638525	-0.530432	-10.6988	0.0281599	-0.962962	1.65	0.504172	S689
R.GYAALEGES(phos)S(phos)PEEELDTKS(phos)PSK.S	Q9VDG2	Rlip	RalA-binding protein 1 OS=Drosophila melanogaster OX=7227 GN=Rlip PE=1 SV=1	-1.89351	0.77623	0.927754	1.26056	-1.16221	0.0714091	-2.77971	-1.65255	1.65	0.0958112	S69,S70,S79
K.T(ac)(phos)TGETSPQ(d)AEKEDSANEQ(d)SADPAVAAEEDESK.Q	Q960D3	vig2	SD06613p OS=Drosophila melanogaster OX=7227 GN=vig2 PE=1 SV=1	-8.38492	-8.57282	-7.87207	-7.48601	-7.37033	-11.3012	-10.4426	-9.81061	1.65	0.0793244	T186
K.QDQNAAGEEDDS(phos)KDWDDIIPEGFRK.A	M9PEB2	Chd1	Chromodomain-helicase-DNA-binding protein 1 isoform C OS=Drosophila melanogaster OX=7227 GN=Chd1 PE=1 SV=1	4.35112	6.95213	6.45773	7.78572	6.06382	6.44463	4.98118	1.48093	1.64	0.221803	S1097
R.QS(phos)PTLSNNLNSGSSKPLR.K	Q8T9F6	Pvr	SD03187p OS=Drosophila melanogaster OX=7227 GN=Pvr PE=2 SV=1	-4.15351	-3.93406	-4.73353	-6.87155	-6.98664	-6.29883	-6.69935	-6.26199	1.64	0.0372249	S1328
R.LGGALTVS(phos)SQR.L	A0A0B4LI25	ncd	Kinesin-like protein OS=Drosophila melanogaster OX=7227 GN=ncd PE=1 SV=1	-7.03257	-7.25158	-7.41255	-8.12427	-9.45831	-10.6869	-8.11064	-8.13097	1.64	0.0309837	S133
R.S(phos)KNDEVAELGEQK.Q	M9PDH1	E(bx)	Enhancer of bithorax isoform H OS=Drosophila melanogaster OX=7227 GN=E(bx) PE=1 SV=1	-6.01251	-5.92155	-6.17476	-6.07538	-6.71504	-6.80755	-6.93348	-10.2954	1.64	0.0788216	S2430
K.STGS(phos)ASQLPITTSR.A	Q9VMD2	Dmel\CG9536	LD47671p OS=Drosophila melanogaster OX=7227 GN=Dmel\CG9536 PE=1 SV=1	2.1163	-1.83574	-2.17992	-1.1294	-2.84804	-2.81443	-2.05774	-1.86375	1.64	0.120382	S385
R.YEPSSPSS(phos)LVEDLAEIIHEEHLSNSLTANNSK.M	P04197	Myb	Myb protein OS=Drosophila melanogaster OX=7227 GN=Myb PE=1 SV=2	-1.93743	-1.4874	-2.61054	-2.23217	-0.717668	-3.51447	-1.06771	-9.53032	1.64	0.407893	S473
K.S(phos)LDGGGERR.T	Q9VUR5	RhoGAP71E	LD04071p OS=Drosophila melanogaster OX=7227 GN=RhoGAP71E PE=1 SV=2	3.46399	0.465134	-0.603802	-3.97295	-1.30325	-1.12892	-2.79802	-1.97746	1.64	0.291424	S487
R.SLS(phos)NS(phos)PLYHR.K	Q8I0A1	SNF4Agamma	LD30628p OS=Drosophila melanogaster OX=7227 GN=SNF4Agamma PE=2 SV=1	-0.938816	1.24918	-1.29839	-1.1748	1.05742	-3.05943	-9.625	2.89035	1.64	0.543874	S80,S82
R.SFHQS(phos)PFDYK.S	A0A0B4K8A5	mahj	Mahjong isoform B OS=Drosophila melanogaster OX=7227 GN=mahj PE=4 SV=1	-10.011	-7.13268	-6.77083	-6.63999	-7.40044	-10.0251	-10.8074	-8.86462	1.64	0.143664	S956
R.KRS(phos)GS(phos)S(phos)PGGGGGHDDDYAENGPR.N	Q9VM49	Caper	Caper isoform A OS=Drosophila melanogaster OX=7227 GN=Caper PE=1 SV=1	-5.06358	-2.7934	-3.66867	-3.47966	-4.41689	-9.34566	-3.76523	-4.00746	1.63	0.243999	S34,S36,S37
R.LYHLSVVDEEEPSTNNTS(phos)HEQEDDDPDQER.A	Q9VJH2	AspRS-m	Aspartyl-tRNA synthetase mitochondrial isoform A OS=Drosophila melanogaster OX=7227 GN=AspRS-m PE=1 SV=3	-3.84308	-3.85208	-3.89902	-4.01362	-10.7297	-3.72314	-4.28418	-3.38587	1.63	0.338174	S997
R.SSS(phos)QSDLPGSR.R	Q8IPK8	Bsg25D	Blastoderm-specific gene 25D isoform C OS=Drosophila melanogaster OX=7227 GN=Bsg25D PE=4 SV=1	0.0588955	-0.227771	-0.900982	-0.571214	-2.35031	-3.13317	0.642864	-3.28871	1.62	0.100687	S115
R.RGS(phos)ESGS(phos)TADAHLR.L	X2JEN2	l(1)G0196	Inositol hexakisphosphate and diphosphoinositol-pentakisphosphate kinase OS=Drosophila melanogaster OX=7227 GN=l(1)G0196 PE=1 SV=1	-5.82167	-5.45228	-1.04389	-6.28507	-6.34808	-6.29883	-6.8624	-5.5716	1.62	0.19577	S1643,S1647
R.NVDAAS(phos)PSLSIC(cam)SVQ(d)SGDS(phos)GKGSSLPR.S	Q9W4C4	spoon	GM14014p OS=Drosophila melanogaster OX=7227 GN=spoon PE=1 SV=2	-4.69711	-1.49557	-1.64107	-1.37661	-0.92716	-4.86898	-6.49199	-3.41121	1.62	0.25151	S260,S273
R.HANPLSS(phos)APSSSGS(phos)TPAPLNAPFR.Q	Q7KK29	Patr-1	BcDNA.LD27979 OS=Drosophila melanogaster OX=7227 GN=Patr-1 PE=2 SV=1	-4.05621	-4.45192	-3.99958	-3.712	-10.9402	-3.83649	-3.69321	-4.21497	1.62	0.34755	S42,S49
R.S(phos)SMASLNS(phos)AFNLDTAYEHNLDR.V	M9PFQ9	CG42348	Uncharacterized protein isoform E OS=Drosophila melanogaster OX=7227 GN=CG42348 PE=1 SV=1	-1.32811	-2.19937	-1.42171	-1.63227	-4.42977	-1.01998	-6.2014	-1.39383	1.62	0.201262	S438,S445
R.QS(phos)GLGSSSNSSNLVEFR.A	A0A0B4LFA6	Rpn13	Regulatory particle non-ATPase 13 isoform G OS=Drosophila melanogaster OX=7227 GN=Rpn13 PE=1 SV=1	-3.1749	-2.69607	-2.50998	-2.75695	-9.13125	-3.16597	-2.98462	-2.31743	1.62	0.301853	S7
R.ALVTATGDPSAPSEELS(phos)PTSSDLLHK.F	Q9VJ30	Nak	Numb-associated kinase isoform A OS=Drosophila melanogaster OX=7227 GN=Nak PE=1 SV=2	-2.14248	-2.08404	-2.21548	-1.64819	-1.72138	-1.58821	-1.56697	-9.67483	1.62	0.407148	S994
K.AS(phos)PAASTTPGADADAENK.Q	Q9VMJ7	lid	Lysine-specific demethylase lid OS=Drosophila melanogaster OX=7227 GN=lid PE=1 SV=1	-6.86227	-6.91902	-6.20875	-6.77331	-7.45733	-8.19201	-7.86234	-9.69845	1.61	0.0123667	S1641
R.RSNS(phos)DGLSTDYAHSLPK.K	Q4V5X3	CG14184	IP06477p (Fragment) OS=Drosophila melanogaster OX=7227 GN=CG14184 PE=2 SV=1	0.1959	-2.31747	0.0333058	-0.0103695	-2.09175	-1.98183	-2.00894	-2.44905	1.61	0.0246704	S50
R.SRS(phos)AC(cam)DIN(d)ELR.G	A0A0B4LI25	ncd	Kinesin-like protein OS=Drosophila melanogaster OX=7227 GN=ncd PE=1 SV=1	-7.1505	-6.78806	-7.2959	-9.44352	-9.39328	-9.47604	-9.2568	-8.97697	1.61	0.0250941	S97
R.KMDTSESES(phos)PVPR.K	X2JEU3	Dmel\CG1737	Uncharacterized protein isoform C OS=Drosophila melanogaster OX=7227 GN=Dmel\CG1737 PE=1 SV=1	-6.96659	-7.48402	-7.51942	-7.15235	-9.8035	-8.26972	-7.48007	-9.98306	1.6	0.0268054	S363
K.VVISDPIQMPEVYSSTPGGTLYS(phos)TT(phos)PGGTKLIYER.A	Q9XZ56	Thor	4E-binding protein THOR OS=Drosophila melanogaster OX=7227 GN=Thor PE=1 SV=1	-2.08489	-2.48622	-2.90345	-2.81566	-2.17064	-1.76953	-3.09348	-9.63767	1.6	0.375104	S45,T47
R.SQDADAGRLS(phos)PR.L	Q9VGD4	ATP8B	Phospholipid-transporting ATPase OS=Drosophila melanogaster OX=7227 GN=ATP8B PE=3 SV=2	0.187161	0.536961	1.31806	0.214625	-0.178257	-1.00754	-3.17487	0.2227	1.6	0.0665694	S719
R.LEYVENESKS(phos)PVIDHR.E	O61380	eIF4G1	Eukaryotic translation initiation factor 4G1 isoform A OS=Drosophila melanogaster OX=7227 GN=eIF4G1 PE=1 SV=3	-3.82647	-4.096	-4.94168	-5.21176	-5.30587	-4.6306	-10.2858	-4.19502	1.59	0.268848	S1501
R.ALHDLS(phos)PVR.I	A1Z9L3	pea	ATP-dependent RNA helicase DHX8 OS=Drosophila melanogaster OX=7227 GN=pea PE=1 SV=1	-0.942008	-0.995344	-0.981337	-0.70635	-0.0893458	-3.38014	-3.85438	-2.676	1.59	0.0778038	S482
K.LSAPNAES(phos)KEK.L	B5RJH6	CG17494-RB	GH14730p (Fragment) OS=Drosophila melanogaster OX=7227 GN=CG17494-RB PE=2 SV=1	-6.22004	-6.18126	-6.0669	-6.09853	-6.17543	-6.28916	-8.87879	-9.60006	1.59	0.0888674	S754
K.YKNQATS(phos)PNIPAC(cam)C(cam)AVGEK.L	M9PE05	enc	Encore isoform H OS=Drosophila melanogaster OX=7227 GN=enc PE=1 SV=1	-3.99924	-4.38363	-4.82285	-4.16115	-11.4195	-4.4773	-4.08896	-3.74166	1.59	0.374256	S865
K.KKEEESDQS(phos)DDDMGFGLFD	M9PBK5	RpLP1	Ribosomal protein LP1 isoform B OS=Drosophila melanogaster OX=7227 GN=RpLP1 PE=3 SV=1	-1.10419	-2.36905	-3.03704	-1.82992	-1.18592	-9.93828	-1.92607	-1.59333	1.58	0.443671	S103
K.NQQQS(phos)PALSVK.K	X2JKW3	Dmel\CG8611	Uncharacterized protein isoform C OS=Drosophila melanogaster OX=7227 GN=Dmel\CG8611 PE=4 SV=1	-3.8867	-4.1936	-4.09173	-4.18882	-4.28816	-4.08351	-9.42886	-4.88447	1.58	0.21278	S23
K.SSEQYN(d)PGS(phos)PTSESNDAQPSEKK.L	Q7KRW8	CG1646	Pre-mRNA-processing factor 39 OS=Drosophila melanogaster OX=7227 GN=CG1646 PE=1 SV=1	-3.11027	-4.82736	-7.13473	-3.9334	-7.67931	-5.23594	-3.28677	-9.13691	1.58	0.301325	S309
K.DIFYSGSVTNLPQYQS(phos)QK.S	Q9W0L6	Dmel\CG13907	GH22266p OS=Drosophila melanogaster OX=7227 GN=Dmel\CG13907 PE=1 SV=1	-6.05612	-6.71453	-5.75923	-6.31187	-9.87537	-8.02868	-7.05504	-6.20769	1.58	0.0718883	S503
R.YSSVTLGS(phos)PK.Q	Q9W0D8	Dmel\CG12099	LD09551p OS=Drosophila melanogaster OX=7227 GN=Dmel\CG12099 PE=2 SV=1	0.584397	1.51106	-0.721562	0.363637	2.89913	2.41385	-9.48413	-0.420669	1.58	0.567926	S599
K.N(d)IREEYDYDEEEDS(phos)LIEFR.S	A0A0B4KG56	PEK	Pancreatic eIF-2alpha kinase isoform C OS=Drosophila melanogaster OX=7227 GN=PEK PE=4 SV=1	-4.17739	-2.5359	-3.31547	-2.86442	-3.37113	-2.63537	-3.23596	-9.98704	1.58	0.35761	S735
R.ENAGS(phos)DDENAKPLSHAQR.Y	Q8SY39	CG6994	ATP-dependent RNA helicase OS=Drosophila melanogaster OX=7227 GN=CG6994 PE=1 SV=1	2.4565	2.11101	1.08217	1.50808	-0.955986	-0.727056	1.18168	1.35033	1.58	0.0409469	S736
R.RS(phos)SMDSLVHDPDVDVANC(cam)DDK.S	P91667	Apc	Adenomatous polyposis coli OS=Drosophila melanogaster OX=7227 GN=Apc PE=2 SV=1	-1.31564	-1.38903	-1.30221	-0.728746	-9.09844	-0.302605	-0.963291	-0.706126	1.58	0.437936	S984
M.S(ac)EATVAQ(d)KPEAVEDVNASTGDEKQT(phos)PK.R	Q9V9U3	Anon1A3	LD45254p OS=Drosophila melanogaster OX=7227 GN=Anon1A3 PE=1 SV=1	-7.13406	-6.75004	-9.52476	-6.56071	-10.7073	-10.6743	-5.54051	-9.38428	1.58	0.253532	T27
K.ANAAAAHLDPLGEHGLEQPLDEHDT(phos)EHEGEDT(phos)PR.N	Q7JQL5	Atg9	Autophagy-related protein 9 OS=Drosophila melanogaster OX=7227 GN=Atg9 PE=1 SV=1	-3.81004	-3.71799	-3.97013	-3.91788	-10.1651	-3.48658	-3.5498	-4.53332	1.58	0.312533	T63,T70
K.C(cam)AVPKPVPVLHS(phos)PQNK.R	A8JR82	Efa6	Exchange factor for Arf 6 isoform C OS=Drosophila melanogaster OX=7227 GN=Efa6 PE=1 SV=1	-2.33048	-1.77982	-2.48373	-3.45892	-9.97263	-2.09306	-2.4772	-1.77059	1.57	0.417706	S254
R.GSPLS(phos)QTPPSNVPSC(cam)LLR.G	Q9XZ56	Thor	4E-binding protein THOR OS=Drosophila melanogaster OX=7227 GN=Thor PE=1 SV=1	-5.79372	-4.1517	-3.55681	-4.35307	-5.53721	-9.12081	-4.98461	-4.48408	1.57	0.179887	S69
K.KEAELENDQEEFIKEDS(phos)PIPHSDS(phos)VAELR.E	Q24478	Cp190	Centrosome-associated zinc finger protein CP190 OS=Drosophila melanogaster OX=7227 GN=Cp190 PE=1 SV=2	-7.87891	-8.10069	-9.35374	-7.97118	-9.36177	-10.5263	-10.2437	-9.47001	1.57	0.0075529	S921,S928
K.QIDENPEQ(d)IHDEPADLSNDKHDPC(cam)LNSSAT(phos)NTTGAPVLQQQR.S	Q9VJ12	Acn	Acinus isoform A OS=Drosophila melanogaster OX=7227 GN=Acn PE=1 SV=1	-3.93932	-3.58134	-3.28191	-3.34555	-2.68473	-3.82248	-10.6755	-3.25391	1.57	0.38704	T291
K.VLLNRT(phos)PT(phos)PEPR.S	Q9W4Z1	EG:BACH48C10.5	EG:BACH48C10.5 protein OS=Drosophila melanogaster OX=7227 GN=EG:BACH48C10.5 PE=1 SV=2	-2.84828	-2.96422	-3.94843	-3.02144	-5.95458	-4.14757	-3.72264	-5.25474	1.57	0.020751	T404,T406
K.REEENAAAAEEEAGEISATGGAT(phos)SPEPVSFK.V	Q9VV74	Smn	Survival motor neuron protein OS=Drosophila melanogaster OX=7227 GN=Smn PE=1 SV=1	-0.444247	-1.39284	-0.678748	-0.654515	-3.22925	-0.325578	-4.54052	-1.36259	1.57	0.117794	T64
K.YDPNRS(phos)PPR.Q	U3PU53	sqz-RA	FI22455p1 OS=Drosophila melanogaster OX=7227 GN=sqz-RA PE=2 SV=1	1.85637	-0.0594127	0.318293	0.0777622	-0.0437667	-2.82313	1.3574	-2.55101	1.56	0.163745	S125
R.HLAATAS(phos)SPIPIVTK.S	Q8MRI4	Dmel\CG1578	LD05643p OS=Drosophila melanogaster OX=7227 GN=Dmel\CG1578 PE=1 SV=1	-3.11027	-3.04582	-3.07572	-3.48919	-9.52015	-3.21089	-3.31286	-2.90887	1.56	0.319737	S325
K.LLTTALGLDKDQEEQLNNSLN(d)NSIAS(phos)PAK	Q9VL72	Etl1	SWI/SNF-related matrix-associated actin-dependent regulator of chromatin subfamily A containing DEAD/H box 1 homolog OS=Drosophila melanogaster OX=7227 GN=Etl1 PE=1 SV=1	-5.59571	-4.29544	-8.02519	-5.6594	-8.07303	-10.0016	-2.45524	-9.26679	1.56	0.39276	S842
R.AT(phos)PPHHMQTFAPR.P	Q94533	S6k	Ribosomal protein S6 kinase OS=Drosophila melanogaster OX=7227 GN=S6k PE=1 SV=2	-7.57625	-7.26492	-7.38638	-8.07294	-10.8629	-8.00001	-9.84364	-7.82546	1.56	0.0601525	T463
R.SSKVS(phos)GDEDEPEK.A	Q9VNE0	Dmel\CG2926	Uncharacterized protein isoform A OS=Drosophila melanogaster OX=7227 GN=Dmel\CG2926 PE=1 SV=1	-1.80366	2.03863	-1.48106	-1.90444	-2.1639	-3.14402	-2.58434	-1.47168	1.55	0.13618	S1083
R.TPTTEQLS(phos)PPPARPPK.S	A0A0B4JDC8	CG6960	Uncharacterized protein isoform C OS=Drosophila melanogaster OX=7227 GN=CG6960 PE=4 SV=1	2.13914	-0.162922	0.228527	-0.177432	0.00789934	0.0115612	-1.07885	-3.1225	1.55	0.10839	S1257
R.TIS(phos)TAS(phos)LTSVSVQMPGVDPHDIER.R	Q9VMD2	Dmel\CG9536	LD47671p OS=Drosophila melanogaster OX=7227 GN=Dmel\CG9536 PE=1 SV=1	-1.0242	-4.21232	-2.68834	-1.57029	-3.03222	-4.22149	-4.17487	-4.26262	1.55	0.063258	S272,S275
R.S(phos)AVFENLK.E	P25991	su(f)	Protein suppressor of forked OS=Drosophila melanogaster OX=7227 GN=su(f) PE=1 SV=2	-5.69563	-5.55778	-5.35224	-5.10831	-5.93609	-10.2948	-6.13473	-5.54892	1.55	0.172849	S543
K.SVT(phos)GAQDGVGGGDAAATADNR.T	Q9VQ76	tho2	LD36155p OS=Drosophila melanogaster OX=7227 GN=tho2 PE=1 SV=2	-6.24506	-8.86324	-7.1391	-8.33349	-9.86547	-8.26972	-9.58576	-9.05154	1.55	0.0444454	T19
R.SM(ox)S(phos)QTPPMPTR.S	Q8INM3	sle	Protein slender lobes OS=Drosophila melanogaster OX=7227 GN=sle PE=1 SV=1	-7.91058	-8.94844	-6.95089	-7.18666	-10.1106	-9.63242	-8.28559	-9.11676	1.54	0.0271498	S156
R.KLS(phos)VSS(phos)IDSVYENK.Q	B7Z0D7	Dmel\CG7504	Uncharacterized protein isoform B OS=Drosophila melanogaster OX=7227 GN=Dmel\CG7504 PE=4 SV=1	1.35625	0.767725	1.02998	1.37	-0.144684	-1.84276	-0.699655	1.05304	1.54	0.0313239	S436,S439
M.PVQS(phos)PIEISNR.A	Q9W3C8	CAH3	LD36568p OS=Drosophila melanogaster OX=7227 GN=CAH3 PE=1 SV=1	-4.87605	-4.70868	-3.21273	-3.77353	-6.32383	-3.41914	-9.68258	-3.28871	1.54	0.314369	S6
R.S(phos)VQPGASLSTAELAMLNR.V	O16844	cos	Kinesin-like protein costa OS=Drosophila melanogaster OX=7227 GN=cos PE=1 SV=2	0.901784	0.0954193	1.09674	0.617742	0.921393	-3.02894	-3.89519	2.56845	1.54	0.31637	S600
R.S(phos)LATPAK.S	A1Z8Q7	MCPH1	Microcephalin isoform A OS=Drosophila melanogaster OX=7227 GN=MCPH1 PE=1 SV=1	-4.90068	-3.81482	-4.9657	-4.90081	-4.88195	-5.42412	-4.65934	-9.75915	1.54	0.214688	S687
R.ASDANEDS(phos)DEEVS(phos)PTKR.S	Q4U2Q2	mus201	XPG variant OS=Drosophila melanogaster OX=7227 GN=mus201 PE=2 SV=1	-3.01307	-3.99528	-3.65884	-3.5007	-4.60497	-9.76605	-2.74378	-3.20876	1.54	0.332012	S798,S803
R.KVVT(phos)REELLAQR.S	Q8T9D1	Chro	SD06626p OS=Drosophila melanogaster OX=7227 GN=Chro PE=2 SV=1	-1.09706	-1.21374	-1.5161	-2.72283	-3.7651	-3.1224	-3.2485	-2.57946	1.54	0.00806154	T642
R.N(d)PMLPTLHTDDPMYSIVVES(phos)PGSITTSR.S	Q9VWE6	CG14215	Protein ELYS homolog OS=Drosophila melanogaster OX=7227 GN=CG14215 PE=1 SV=2	-6.13575	-5.5924	-5.12427	-6.19501	-7.14969	-5.852	-6.78732	-9.36629	1.53	0.0722889	S1523
K.WSS(phos)M(ox)DNISQGGPR.R	Q9VKF0	CycY	Cyclin Y isoform A OS=Drosophila melanogaster OX=7227 GN=CycY PE=1 SV=1	3.4685	2.3319	3.40387	2.12259	1.02828	1.01127	1.51401	1.6703	1.53	0.00470256	S390
K.KPSQVMNFDS(phos)EEEDTAKPMSYDEK.R	M9PJC7	fs(1)h	Female sterile (1) homeotic isoform G OS=Drosophila melanogaster OX=7227 GN=fs(1)h PE=1 SV=1	-3.99658	-4.03759	-3.83347	-3.76888	-4.67225	-4.53897	-6.17245	-6.38717	1.53	0.0125757	S944
R.GRT(phos)PS(phos)LER.E	Q9VWN4	Flacc	Fl(2)d-associated complex component OS=Drosophila melanogaster OX=7227 GN=Flacc PE=1 SV=1	1.18392	2.34911	2.52333	2.15353	2.11034	2.21858	-3.50249	1.2679	1.53	0.266603	T269,S271
R.ST(phos)PS(phos)PLVKEDR.A	Q9VNE0	Dmel\CG2926	Uncharacterized protein isoform A OS=Drosophila melanogaster OX=7227 GN=Dmel\CG2926 PE=1 SV=1	-3.58976	-4.16206	-4.17049	-3.5007	-10.4615	-3.83649	-3.55135	-3.69578	1.53	0.355638	T962,S964
K.S(phos)APC(cam)LTGNYFR.H	Q9VUQ9	dop	Drop out isoform A OS=Drosophila melanogaster OX=7227 GN=dop PE=1 SV=1	0.290059	0.733194	0.355118	0.526138	-1.88914	-0.432912	-0.907562	-0.953622	1.52	0.00192772	S238
K.EDSTQDNDS(phos)DDPEELR.L	Q8IHF9	CG4294	AT04551p (Fragment) OS=Drosophila melanogaster OX=7227 GN=CG4294 PE=2 SV=1	-3.48921	-3.21083	-3.47696	-3.12308	-5.93609	-4.29213	-4.40807	-4.74581	1.52	0.00464174	S509
K.SAS(phos)TGTFLNVPR.Q	Q9VID4	Mondo	LD38259p OS=Drosophila melanogaster OX=7227 GN=Mondo PE=2 SV=2	-3.66795	-3.51177	-3.19843	-3.30798	-9.60236	-3.70375	-3.22354	-3.25391	1.52	0.318218	S597
R.SVDEASRPTSVETVEDSVQGAEQALAPIVLPAAS(phos)PQK.V	Q8T096	CG15439	LD18949p OS=Drosophila melanogaster OX=7227 GN=CG15439 PE=2 SV=1	2.68836	1.69275	0.188278	0.775241	-2.19105	-0.390307	-0.0247598	1.85105	1.52	0.136735	S668
R.AGSGRSS(phos)PVPSDAGSTASAGSSIDDK.T	Q7JQK6	GLS	Glutaminase isoform A OS=Drosophila melanogaster OX=7227 GN=GLS PE=1 SV=1	-6.08971	-5.70153	-5.20203	-5.00083	-5.83839	-5.79617	-7.1347	-9.3122	1.52	0.0950352	S683
R.S(phos)PSQ(d)IPR.R	X2JE07	Dmel\CG1677	Uncharacterized protein isoform D OS=Drosophila melanogaster OX=7227 GN=Dmel\CG1677 PE=1 SV=1	-4.30639	-3.94297	-5.04026	-4.33922	-8.89635	-5.50014	-5.34478	-3.95993	1.52	0.165457	S789
R.ET(phos)SITAK.D	M9MRJ4	Msp300	Muscle-specific protein 300 kDa isoform G OS=Drosophila melanogaster OX=7227 GN=Msp300 PE=1 SV=1	-2.18723	-2.84464	-3.25798	-3.34037	-3.45752	-3.8	-6.42217	-4.01327	1.52	0.0576264	T13078
R.KLPPVPGSNYNT(phos)C(cam)DR.I	A0A0B4K7H9	Dscam1	Down syndrome cell adhesion molecule 1 isoform BI OS=Drosophila melanogaster OX=7227 GN=Dscam1 PE=1 SV=1	-3.53475	-3.27968	-4.02712	-3.22605	-5.75497	-3.71989	-5.37745	-5.28722	1.52	0.0126683	T1709
R.SSS(phos)VKT(phos)PDVAAVSPPAFK.E	A0A0B4KGU9	Esyt2	Extended synaptotagmin-like protein 2 isoform D OS=Drosophila melanogaster OX=7227 GN=Esyt2 PE=1 SV=1	-4.57711	-5.74761	-5.79321	-5.62539	-6.17543	-7.02778	-6.90621	-7.71529	1.52	0.00722384	S605,T608
R.DDDES(phos)EASDFAGFDSKP	Q9VSK4	Dmel\CG6983	GM13032p OS=Drosophila melanogaster OX=7227 GN=Dmel\CG6983 PE=1 SV=1	-4.92574	-3.93406	-4.27766	-4.17646	-3.81704	-9.7762	-5.19171	-4.56711	1.51	0.262052	S169
R.S(phos)SETAIPEENIDDFASAELFSK.V	H1ZYH4	chico	Uncharacterized protein chico OS=Drosophila melanogaster OX=7227 GN=chico PE=4 SV=1	-0.679738	-3.9976	-1.9529	-0.896075	-1.31814	-0.839397	-10.059	-1.36568	1.51	0.500949	S380
R.S(phos)DSDHFTAASLLDDPLVANTEKENR.D	Q6NNE1	CG31037	RH02355p OS=Drosophila melanogaster OX=7227 GN=CG31037 PE=2 SV=1	-0.596896	-0.600195	-1.63143	-0.0415691	-2.97209	-2.26596	-3.04894	-0.61312	1.51	0.0417401	S565
R.S(phos)NNAINSGYQDENC(cam)AYNSN(d)GPESNSR.S	Q7JRH5	Dmel\CG5726	RE28271p OS=Drosophila melanogaster OX=7227 GN=Dmel\CG5726 PE=1 SV=1	-2.89701	-5.2019	-5.33337	-5.58397	-8.16912	-6.08303	-4.09121	-6.70051	1.51	0.160326	S613
K.IPSRNPT(phos)PVLPGAVR.K	Q9VT00	Jarid2	Jumonji AT rich interactive domain 2 OS=Drosophila melanogaster OX=7227 GN=Jarid2 PE=1 SV=3	3.61146	3.18134	2.97758	2.26043	0.155343	1.76513	2.06288	2.00868	1.51	0.0190361	T220
K.KIVIEDS(phos)DDDANHSDVDPSADSSPR.K	Q9VX35	CC4	LD36501p OS=Drosophila melanogaster OX=7227 GN=CC4 PE=1 SV=1	-5.22218	-5.33625	-5.89102	-5.55968	-7.8839	-6.33816	-7.28154	-6.49143	1.5	0.00515207	S101
D.LFGS(phos)DDEEDEEAER.I	O96827	eEF1beta	Probable elongation factor 1-beta OS=Drosophila melanogaster OX=7227 GN=eEF1beta PE=1 SV=3	-9.16153	-8.41082	-8.98834	-8.80317	-10.713	-10.6079	-10.0827	-9.95989	1.5	0.000643239	S105
K.ASIVQQPDGQS(phos)PIAAIPQLQIQPSPQHSR.L	A0A0C4DHD4	yki	Yorkie isoform G OS=Drosophila melanogaster OX=7227 GN=yki PE=1 SV=1	-2.02951	-2.66811	-2.97478	-4.96317	-2.35798	-2.51781	-10.672	-3.09144	1.5	0.458714	S118
K.LQPAHVPIKTS(phos)PQPLSPEK.T	Q9VU84	Abp1	Drebrin-like protein OS=Drosophila melanogaster OX=7227 GN=Abp1 PE=1 SV=1	-2.4989	-3.30242	-3.11548	-3.27464	-2.54679	-2.64304	-3.46837	-9.52541	1.5	0.360265	S238
K.RYS(phos)NS(phos)SIFLENR.D	Q9VSX7	4080	LD02310p OS=Drosophila melanogaster OX=7227 GN=4080 PE=2 SV=1	-3.65952	-2.29591	-2.72887	-3.40382	-1.30325	-0.870593	-10.1798	-5.72207	1.5	0.478996	S455,S457
R.S(phos)QSDSSRPRPPLTGR.N	Q9VAH7	yata	RE62393p OS=Drosophila melanogaster OX=7227 GN=yata PE=1 SV=1	-5.16735	-5.87819	-5.67762	-6.20753	-7.66097	-7.29744	-6.75406	-7.23618	1.5	0.00123257	S584
K.LSS(phos)GDAAAAEK.K	Q9VRP9	Bre1	E3 ubiquitin-protein ligase Bre1 OS=Drosophila melanogaster OX=7227 GN=Bre1 PE=1 SV=2	0.0620858	0.959166	1.07483	1.0547	-0.413871	-0.942168	-0.581962	-0.905553	1.5	0.00104033	S622
R.HLDTDEFDLQS(phos)LHQS(phos)QRPMTLPTRGAT(phos)QR.V	Q9I7F7	Ack-like	Activated Cdc42 kinase-like OS=Drosophila melanogaster OX=7227 GN=Ack-like PE=1 SV=3	0.0700307	-0.576178	0.160807	-0.246439	-1.7066	-1.60685	-2.16059	-1.11865	1.5	0.000977975	S881,S885,T897
K.NGAQELQNTT(phos)TESTA	Q95RE4	yps	LD37574p OS=Drosophila melanogaster OX=7227 GN=yps PE=1 SV=1	-7.93073	-6.7407	-7.74692	-7.70651	-9.52472	-9.60761	-8.56272	-8.42104	1.5	0.00656352	T348
K.ADDAS(phos)DDEDVKVKGDGEDGDGDKS(phos)DEK.A	Q9VT61	Dmel\CG8108	LD27033p OS=Drosophila melanogaster OX=7227 GN=Dmel\CG8108 PE=1 SV=1	-9.60397	-7.60321	-7.25508	-8.86533	-10.2009	-9.78701	-9.55258	-9.74702	1.49	0.0251327	S382,S401
W.RTSARPQSIDT(phos)SPTR.R	Q7PLL3	eIF4B	Eukaryotic initiation factor 4B OS=Drosophila melanogaster OX=7227 GN=eIF4B PE=1 SV=1	-8.92485	-8.19969	-3.99463	-4.39185	-8.64003	-3.8542	-9.61351	-9.37308	1.49	0.406226	T237
M.S(ac)GT(phos)S(phos)QKHR.N	Q9VLU0	baf	Barrier-to-autointegration factor OS=Drosophila melanogaster OX=7227 GN=baf PE=1 SV=1	-8.99951	-7.76122	-9.19996	-9.37071	-10.5858	-11.054	-10.1533	-9.51183	1.49	0.01427	T5,S6
R.M(ac)PT(phos)KLLWMQR.Q	P36241	RpL19	60S ribosomal protein L19 OS=Drosophila melanogaster OX=7227 GN=RpL19 PE=1 SV=2	-5.13777	-4.81914	-5.16819	-5.04511	-6.58544	-6.69861	-6.50396	-6.32804	1.49	4.22e-05	T92
R.SGDADPEVAS(phos)TAS(phos)EKQR.S	Q86P46	CG8046	SD23581p (Fragment) OS=Drosophila melanogaster OX=7227 GN=CG8046 PE=2 SV=1	2.88357	3.05422	1.23488	0.295916	-1.23807	-1.32176	1.74495	2.37583	1.48	0.21184	S25,S28
K.VLDGDDTNDGVGVDLDDES(phos)QGAGGR.N	Q9VYV4	Amun	Amun isoform A OS=Drosophila melanogaster OX=7227 GN=Amun PE=1 SV=1	-0.926117	-0.617917	-0.924328	-0.804029	-0.745077	-0.480247	-7.5983	-0.387277	1.48	0.386428	S263
K.AIPPPPVQDDEDDDDDDDC(cam)VVIEDDTPLSIS(phos)PSGK.R	Q0E8J0	MEP-1	MEP-1 isoform A OS=Drosophila melanogaster OX=7227 GN=MEP-1 PE=1 SV=1	-4.32627	-3.72758	-2.49243	-2.06613	-2.50359	-3.87574	-9.50817	-2.63064	1.48	0.380954	S341
R.LT(phos)TIDNLER.T	Q94883	Dref	DNA replication-related element factor isoform A OS=Drosophila melanogaster OX=7227 GN=Dref PE=1 SV=2	-6.36333	-6.37257	-6.39189	-6.58993	-7.54712	-7.10199	-6.54048	-10.4315	1.48	0.106189	T548
K.VSYSAPNS(phos)PPTPHEQQEQK.Y	U3PU53	sqz-RA	FI22455p1 OS=Drosophila melanogaster OX=7227 GN=sqz-RA PE=2 SV=1	2.04554	0.422426	0.426062	0.178978	-0.0146667	-2.3577	1.93708	-2.35999	1.47	0.195495	S108
R.R(ac)LS(phos)LLETDSRPSTPQLDTVAELGTAS(phos)PR.A	Q8INM3	sle	Protein slender lobes OS=Drosophila melanogaster OX=7227 GN=sle PE=1 SV=1	-3.61808	-4.53702	-3.65493	-3.72095	-9.48065	-4.07934	-4.07103	-3.77747	1.47	0.28536	S13,S36
K.ALNQEENEPTGDAEATES(phos)RSET(phos)PLEVMR.L	Q9VU76	cmb	Combover isoform A OS=Drosophila melanogaster OX=7227 GN=cmb PE=1 SV=2	-3.93932	-2.64977	-2.57316	-2.65692	-2.99584	-9.32293	-2.90309	-2.48898	1.47	0.363901	S1398,T1402
R.NEIPQDGPAS(phos)MEPEGVIESTWHEVYDNFDDMNLR.E	C8VV33	eIF-4a-RD	AT04852p OS=Drosophila melanogaster OX=7227 GN=eIF-4a-RD PE=2 SV=1	-2.82451	-1.83057	-1.74636	-1.97631	-2.04764	-1.98183	-9.83161	-0.381003	1.47	0.475308	S15
R.D(ac)HRQ(d)S(phos)PMQQNQPFR.K	Q6AWQ1	SRm160	RE71183p OS=Drosophila melanogaster OX=7227 GN=SRm160 PE=2 SV=1	0.539325	-5.07409	-3.93414	-4.88564	-5.1754	-4.27057	-5.35559	-4.41323	1.47	0.270338	S501
R.FADDDFDKDTPEGAS(phos)PQHPLQQRPK.L	M9PB57	Wee1	Wee1-like protein kinase OS=Drosophila melanogaster OX=7227 GN=Wee1 PE=3 SV=1	0.741889	0.566682	0.228527	0.38986	-2.09175	-1.66426	-1.3221	1.1374	1.47	0.066384	S53
R.QRHDS(phos)NTLESQR.S	E8NH23	cenB1A-RB	SD22850p OS=Drosophila melanogaster OX=7227 GN=cenB1A-RB PE=2 SV=1	-2.4989	-2.15342	-2.00796	-2.01707	-3.00787	-3.26908	-4.09121	-4.19723	1.47	0.00222841	S585
K.DALNEPS(phos)FNLPAAGGGQ(d)NFFDGELPAPGPGPVPDETAK.Q	A8JQY2	anon-87Ab	Uncharacterized protein isoform C OS=Drosophila melanogaster OX=7227 GN=anon-87Ab PE=1 SV=1	-2.94744	-2.8035	-2.9151	-3.11568	-5.3178	-3.02894	-2.23971	-7.02111	1.46	0.187422	S467
K.KEPMEDSMDATC(cam)NQ(d)NS(phos)NEPQDLK.V	Q7KUA8	Gug	Grunge isoform D OS=Drosophila melanogaster OX=7227 GN=Gug PE=4 SV=1	-0.734038	-0.385779	0.267684	-0.158307	-3.69345	-0.116141	-1.57484	-1.48508	1.46	0.0766735	S617
R.SMSRS(phos)PS(phos)PVQAAPVAAEPVLDTLEEEEQPEDK.T	A1ZBB4	SAF-A	Uncharacterized protein isoform B OS=Drosophila melanogaster OX=7227 GN=SAF-A PE=1 SV=1	2.12396	0.928972	1.81315	1.68262	0.271804	0.0596365	-0.0657637	0.450842	1.46	0.00129135	S68,S70
K.TLC(cam)SIDEDFENLS(phos)S(phos)PRDLPDS(phos)VNTR.V	Q9W4C4	spoon	GM14014p OS=Drosophila melanogaster OX=7227 GN=spoon PE=1 SV=2	-8.79273	-1.54133	-2.10465	-0.997792	-1.42693	-3.75107	-6.50396	-7.54403	1.45	0.508754	S156,S157,S164
R.SMS(phos)LNN(d)GAGSGGGAAATK.R	H0RNJ0	NC2alpha-RA	FI17839p1 (Fragment) OS=Drosophila melanogaster OX=7227 GN=NC2alpha-RA PE=2 SV=1	-1.05843	-6.36059	-1.8376	-1.58553	-3.77945	-6.75073	-2.39827	-3.69734	1.45	0.334814	S168
R.LFEDNLNDS(phos)VKLT(phos)PAKEVSS(phos)TKK.A	Q8IRH5	CG2199	Zinc finger protein CG2199 OS=Drosophila melanogaster OX=7227 GN=CG2199 PE=1 SV=1	-5.59571	-5.38397	-5.36496	-5.18055	-6.98854	-6.67324	-7.12358	-6.55782	1.45	0.000131286	S177,T181,S188
K.MVEPS(phos)PETVGDFQ(d)SVQEEVESPPK.T	B7YZZ9	Rrp1	DNA-(apurinic or apyrimidinic site) lyase OS=Drosophila melanogaster OX=7227 GN=Rrp1 PE=1 SV=1	-6.49817	-3.48388	-9.19087	-7.06542	-9.5947	-7.72778	-7.32335	-7.40108	1.45	0.257669	S259
R.ASGES(phos)SPTSSSSVDSPTNTSSDSVKR.E	A8JR82	Efa6	Exchange factor for Arf 6 isoform C OS=Drosophila melanogaster OX=7227 GN=Efa6 PE=1 SV=1	0.191537	0.309771	0.437554	0.295916	-1.15886	-1.00506	-1.13884	-1.24684	1.45	2.34e-05	S383
K.RHS(phos)S(phos)PTAVAVT(phos)PAKK.Q	Q9Y095	XRCC1	FI04011p OS=Drosophila melanogaster OX=7227 GN=XRCC1 PE=1 SV=1	-4.41575	-4.46149	-4.46352	-4.59491	-5.18629	-6.8524	-5.31812	-6.36719	1.45	0.00745046	S397,S398,T405
K.LEGAN(d)AS(phos)AEEADEGTDITSESGVDVVLNHR.L	A0A126GUT1	Tctp	Translationally controlled tumor protein isoform B OS=Drosophila melanogaster OX=7227 GN=Tctp PE=3 SV=1	-7.04569	-6.93492	-8.19651	-10.2938	-10.4307	-8.0095	-10.2744	-9.5691	1.45	0.14051	S51
M.S(phos)GSQVGDLGSGAGK.G	Q0E8X8	SK[[66]]	FI01416p OS=Drosophila melanogaster OX=7227 GN=SK[[66]] PE=1 SV=1	-6.92153	-6.78806	-6.32823	-7.34095	-8.16912	-8.69055	-8.37951	-7.90101	1.44	0.00115869	S23
R.KAS(phos)AS(phos)VDEEQPAAK.K	B7Z0I8	CG14896	Uncharacterized protein OS=Drosophila melanogaster OX=7227 GN=CG14896 PE=1 SV=1	-6.97912	-7.54509	-6.29133	-6.71849	-9.48387	-8.4262	-7.48244	-7.90676	1.44	0.0188046	S3075,S3077
R.YNLALSQS(phos)QLDSAC(cam)LYESR.S	Q9VN82	cno	Canoe isoform E OS=Drosophila melanogaster OX=7227 GN=cno PE=1 SV=2	1.57302	2.55342	0.367187	1.90802	1.63261	0.538132	-2.38437	0.841307	1.44	0.155033	S486
K.LSVQS(phos)PPKS(phos)GSKR.K	Q9VSD9	Uba2	Smt3 activating enzyme 2 OS=Drosophila melanogaster OX=7227 GN=Uba2 PE=2 SV=3	-4.4774	-4.49712	-4.52644	-4.97919	-10.163	-4.54471	-5.19656	-4.3506	1.44	0.289504	S648,S652
K.ESS(phos)TLQAELEPVLMDPSVQSSSSPTKR.K	Q9XZ32	Dmel\CG10254	Uncharacterized protein isoform A OS=Drosophila melanogaster OX=7227 GN=Dmel\CG10254 PE=1 SV=1	-0.919809	-1.42758	-1.63625	-1.23765	-0.487714	-0.832799	0.0539092	-9.7134	1.44	0.518951	S845
R.ARGRT(phos)PS(phos)LER.E	Q9VWN4	Flacc	Fl(2)d-associated complex component OS=Drosophila melanogaster OX=7227 GN=Flacc PE=1 SV=1	-1.30327	-0.102422	-1.29078	-1.18638	-0.494042	-0.81752	-6.48011	-1.85938	1.44	0.30049	T269,S271
R.EKDQTEVANLN(d)DS(phos)DNEELQK.E	Q9VKB4	CG6712	Probable ribosome production factor 1 OS=Drosophila melanogaster OX=7227 GN=CG6712 PE=2 SV=1	-5.09735	-6.54086	-4.13193	-4.94733	-5.03592	-5.78254	-10.0931	-5.51007	1.43	0.259479	S162
K.FVVEES(phos)DES(phos)EDEDQKR.R	Q9VID9	BEST:LD19244	Uncharacterized protein isoform B OS=Drosophila melanogaster OX=7227 GN=BEST:LD19244 PE=1 SV=3	-4.38067	-1.56692	-1.287	-1.32452	-3.51642	-3.22234	-2.60032	-4.95727	1.43	0.125646	S1744,S1747
R.SST(phos)C(cam)DSIQSSSSPIANC(cam)PSR.Q	A1Z7A6	Asap	ArfGAP with SH3 domain ANK repeat and PH domain-containing protein OS=Drosophila melanogaster OX=7227 GN=Asap PE=1 SV=1	-2.62663	-3.26564	-2.42428	-2.15432	-6.54985	-4.39724	-0.316484	-4.92041	1.43	0.282168	T747
R.KSTDTPVDLGANC(cam)LTTGS(phos)PSKDLVK.Q	A0A0B4LFV9	MESR4	Misexpression suppressor of ras 4 isoform C OS=Drosophila melanogaster OX=7227 GN=MESR4 PE=1 SV=1	-2.29739	-2.26766	-2.70846	-2.20837	-1.43909	-2.42889	-8.97595	-2.32344	1.42	0.40031	S151
R.DLS(phos)PM(ox)PEHYAPR.L	Q9VWN4	Flacc	Fl(2)d-associated complex component OS=Drosophila melanogaster OX=7227 GN=Flacc PE=1 SV=1	-2.07785	-2.40706	-1.68028	-2.10955	-1.94583	-1.62954	-8.05674	-2.31146	1.42	0.344694	S423
K.S(phos)PTAEPADLSK.R	Q9VS50	eco	N-acetyltransferase eco OS=Drosophila melanogaster OX=7227 GN=eco PE=1 SV=1	-4.7907	-2.29591	-1.51167	-2.36618	-1.3484	-2.98927	-2.66606	-9.63337	1.42	0.458549	S579
R.RSS(phos)VSDAGLLSVSNSLFDC(cam)TTSPDKLESDK.L	Q8IQ95	pbl	Pebble isoform D OS=Drosophila melanogaster OX=7227 GN=pbl PE=4 SV=1	-2.93466	-3.22434	-3.73523	-3.91531	-9.99772	-3.35471	-3.2485	-2.88205	1.42	0.396371	S729
K.NSLAT(phos)PPT(phos)PR.R	Q9W060	mv	Mauve OS=Drosophila melanogaster OX=7227 GN=mv PE=4 SV=2	0.721857	0.122354	0.526338	-0.516613	-2.29034	-0.594654	-1.87173	-0.086197	1.42	0.0350672	T1116,T1119
R.DGANPDYVN(d)VST(phos)PGHGSSTNAYR.A	Q9VHH8	beag	Beag OS=Drosophila melanogaster OX=7227 GN=beag PE=1 SV=1	-2.55645	-3.58831	-2.76004	-3.16522	-7.64586	-3.09057	-3.63281	-3.37336	1.42	0.200722	T124
K.RNNS(phos)QQSTGTVAS(phos)TGTTPSKENEAPAAAASDSTGETPTKK.H	Q9VHC8	Dmel\CG8149	LD31448p OS=Drosophila melanogaster OX=7227 GN=Dmel\CG8149 PE=1 SV=1	-1.3115	-2.43821	-3.11548	-2.63561	-2.84804	-5.67164	-3.03802	-3.60232	1.41	0.0801363	S123,S132
K.MNS(phos)GSRSEGNPVTGEGYK.V	B5RJ67	Jupiter-RD	FI07631p (Fragment) OS=Drosophila melanogaster OX=7227 GN=Jupiter-RD PE=2 SV=1	-10.1687	-9.5106	-7.68819	-7.76086	-10.1649	-10.3482	-10.167	-10.0835	1.41	0.0460155	S181
R.ATS(phos)QAPPTAS(phos)PSVRR.S	Q9VWE6	CG14215	Protein ELYS homolog OS=Drosophila melanogaster OX=7227 GN=CG14215 PE=1 SV=2	-4.33968	-5.80329	-7.83621	-8.37245	-10.0254	-6.16906	-5.73139	-10.0794	1.41	0.337715	S1976,S1983
R.KILGGGSSGS(phos)PQKK.A	Q9VKD2	Hacd1	Very-long-chain (3R)-3-hydroxyacyl-CoA dehydratase OS=Drosophila melanogaster OX=7227 GN=Hacd1 PE=1 SV=1	2.69094	2.68796	2.39069	2.52581	2.43571	0.512452	-0.319787	2.02943	1.41	0.0513508	S240
R.SMS(phos)GSLAQAQNASYDDGR.Q	Q9W4X4	PI4KIIIalpha	Phosphatidylinositol 4-kinase III alpha isoform C OS=Drosophila melanogaster OX=7227 GN=PI4KIIIalpha PE=1 SV=3	-2.27307	-2.72459	-2.31997	-2.63561	-4.4526	-5.1547	-3.32608	-2.6456	1.41	0.0335155	S247
K.LGDSGEAFFVEEC(cam)LEDEDEELPANLATS(phos)PIPNSFLASR.D	E5DK16	Lpin	Lipin isoform J OS=Drosophila melanogaster OX=7227 GN=Lpin PE=1 SV=1	-2.21786	-1.90476	-1.46813	-2.35743	-1.72138	-1.21495	-1.83346	-8.81433	1.41	0.42301	S31
K.NGHGNGQEHS(phos)PLIGEK.T	Q9W266	wdp	Protein windpipe OS=Drosophila melanogaster OX=7227 GN=wdp PE=1 SV=1	-5.89897	-2.33202	-4.17049	-4.92647	-4.57604	-3.34216	-10.7245	-4.30712	1.41	0.429609	S519
K.N(d)GS(phos)VERPS(phos)TPAGGIGSAK.Q	Q5KTT4	dNAT1	Uncharacterized protein dNAT1 (Fragment) OS=Drosophila melanogaster OX=7227 GN=dNAT1 PE=2 SV=1	-4.18645	-5.07899	-4.50164	-5.21176	-5.86438	-6.66073	-5.30759	-6.7644	1.4	0.0100089	S1094,S1099
K.VAEKDS(phos)ES(phos)DVDAGTEDEK.S	Q9VX35	CC4	LD36501p OS=Drosophila melanogaster OX=7227 GN=CC4 PE=1 SV=1	-1.14407	-0.574015	-0.206771	-0.490069	-1.72633	-3.47284	-1.54748	-1.27855	1.4	0.0263204	S179,S181
R.VEVAHVAELHADEAQQREES(phos)DNDEDLFGFEK.S	Q9V3P2	l(2)34Fd	LD41558p OS=Drosophila melanogaster OX=7227 GN=l(2)34Fd PE=1 SV=1	-2.14984	-2.48622	0.640126	-3.44032	-2.88083	-6.1869	-4.66269	0.700502	1.4	0.401486	S539
R.TESESS(phos)VEEVPTKR.V	A0A0B4KFB8	CG33097	Uncharacterized protein isoform C OS=Drosophila melanogaster OX=7227 GN=CG33097 PE=1 SV=1	-6.76318	-6.33691	-7.53947	-5.96492	-9.67237	-6.28916	-7.0168	-9.24206	1.4	0.130323	S547
K.RERS(phos)ES(phos)PFSPAFSPVK.S	A0A0B4KHR6	NSD	Nuclear receptor binding SET domain protein isoform B OS=Drosophila melanogaster OX=7227 GN=NSD PE=4 SV=1	-4.42287	-3.83126	-4.40652	-4.97919	-3.38048	-10.0042	-5.33406	-4.5361	1.4	0.329607	S576,S578
K.LLQDPLLS(phos)PTTR.A	A0A0B4LG23	cora	Coracle isoform G OS=Drosophila melanogaster OX=7227 GN=cora PE=1 SV=1	4.55593	4.2951	4.08558	3.06061	2.21103	2.88497	2.44256	2.85424	1.4	0.00551302	S660
K.S(phos)APPDQTPQFQLDEESR.A	A1ZBE8	CG15099	Protein dopey-1 homolog OS=Drosophila melanogaster OX=7227 GN=CG15099 PE=1 SV=1	-6.47727	-6.69333	-6.02592	-6.82063	-6.84015	-7.78369	-7.73272	-9.279	1.4	0.0261492	S688
R.SQ(d)S(phos)PPRTEQVVMTPR.G	Q9W3D6	Dmel\CG12065	Uncharacterized protein isoform A OS=Drosophila melanogaster OX=7227 GN=Dmel\CG12065 PE=1 SV=1	-3.74615	-4.3418	-4.35803	-4.95259	-9.70465	-4.61542	-4.25354	-4.42868	1.4	0.289755	S77
R.IGDGLSST(phos)PR.R	A1Z9I5	tum	FI24033p1 OS=Drosophila melanogaster OX=7227 GN=tum PE=1 SV=1	-7.54796	-6.68434	-6.9878	-7.17924	-9.45419	-8.49564	-8.06381	-7.9777	1.4	0.00684415	T279
R.RQT(phos)SDEDVRTPDLGK.G	Q9W061	mu2	Mutator 2 isoform B OS=Drosophila melanogaster OX=7227 GN=mu2 PE=1 SV=1	-0.78472	-0.622381	-7.74359	-0.670683	-10.5128	-3.05943	0.555433	-2.38488	1.4	0.617486	T755
K.YAPEEAKEDVAEAKEEDAS(phos)PAGVQDQPD.G	Q86PC7	CG1910	SD23516p OS=Drosophila melanogaster OX=7227 GN=CG1910 PE=2 SV=1	3.92792	3.7539	3.15339	3.68513	1.2777	1.36697	5.25535	1.05304	1.39	0.179733	S121
R.LLELEDEEQNS(phos)KDADEN(d)GGDKENITNK.S	Q9NG27	timeout	TIMEOUT OS=Drosophila melanogaster OX=7227 GN=timeout PE=2 SV=1	-2.28113	-2.90864	-1.49847	-1.82992	-10.0982	-1.59563	-0.6783	-1.72221	1.39	0.512498	S1282
R.S(phos)SDELSHS(phos)SEDLLEGDGIVREELPAGK.V	A4UZI0	Khc-73	Kinesin heavy chain 73 isoform C OS=Drosophila melanogaster OX=7227 GN=Khc-73 PE=1 SV=1	6.06588	2.59728	2.33954	1.61754	-0.50465	4.94214	0.676405	1.94456	1.39	0.35268	S1685,S1692
K.YTWEMLHEDDS(phos)TDDEGKVTHK.R	A0A0B4LFQ2	Incenp	Inner centromere protein isoform C OS=Drosophila melanogaster OX=7227 GN=Incenp PE=1 SV=1	-4.56525	-4.22313	-2.159	-3.57992	-4.64571	-2.59015	-10.1001	-2.73879	1.39	0.433385	S672
K.S(phos)PGFDHVN(d)NKNEITEMSAK.L	Q9I7F7	Ack-like	Activated Cdc42 kinase-like OS=Drosophila melanogaster OX=7227 GN=Ack-like PE=1 SV=3	-2.96033	-2.5275	-2.93868	-3.19142	-7.27426	-3.45923	-3.199	-3.24249	1.39	0.174217	S692
R.QAPISNS(phos)PPIPTHQR.L	A0A0B4JCV4	tacc	Transforming acidic coiled-coil protein isoform J OS=Drosophila melanogaster OX=7227 GN=tacc PE=1 SV=1	3.44731	4.82217	3.49606	3.54339	3.04083	2.48819	1.94398	2.26018	1.39	0.00875262	S754
R.NEELTLS(phos)DGELESK.R	Q9VQK5	Dmel\CG3542	LD24714p OS=Drosophila melanogaster OX=7227 GN=Dmel\CG3542 PE=1 SV=1	-5.04699	-5.07409	-4.5336	-4.84593	-4.87313	-9.68801	-4.96793	-5.54892	1.39	0.227757	S786
K.QLIQSVS(phos)ES(phos)ESLLGSDTLPELR.L	Q9VIV2	swm	Zinc finger protein swm OS=Drosophila melanogaster OX=7227 GN=swm PE=1 SV=1	-6.64693	-6.38466	-5.73426	-8.6112	-8.5529	-8.67034	-8.38393	-7.28407	1.38	0.069192	S1031,S1033
K.NLAEEEEAGTTHQNNVS(phos)TSPK.T	Q9VNE0	Dmel\CG2926	Uncharacterized protein isoform A OS=Drosophila melanogaster OX=7227 GN=Dmel\CG2926 PE=1 SV=1	2.38823	2.3319	2.2048	2.69835	2.42736	-3.84001	2.8441	2.67202	1.38	0.382309	S1072
R.S(phos)FKLDDDDDGMSGSGTAPTGTAPTGTIK.T	C5WLN0	CG2691-RA	RE72321p (Fragment) OS=Drosophila melanogaster OX=7227 GN=CG2691-RA PE=2 SV=1	-3.68069	-3.63446	-5.9473	-3.24045	-5.44279	-5.65913	-5.60997	-5.33009	1.38	0.0468603	S119
K.S(phos)SSC(cam)STIYLDDSTVSQPNLK.N	Q9VKF0	CycY	Cyclin Y isoform A OS=Drosophila melanogaster OX=7227 GN=CycY PE=1 SV=1	4.46094	3.65361	4.41842	3.5228	2.75094	2.18646	2.82366	2.78618	1.38	0.00215051	S163
R.LGSS(phos)RS(phos)PPSSSTTTTTK.I	Q9VWN4	Flacc	Fl(2)d-associated complex component OS=Drosophila melanogaster OX=7227 GN=Flacc PE=1 SV=1	1.51017	2.76048	2.83496	2.6931	2.68944	2.62828	-2.75268	1.72948	1.38	0.294112	S204,S206
R.S(phos)PDLYTDFN	Q9VNR6	l(3)04053	Lethal (3) 04053 OS=Drosophila melanogaster OX=7227 GN=l(3)04053 PE=1 SV=1	-1.67062	-2.11516	-1.25335	-1.17865	-2.42089	-2.09306	-5.41087	-1.81219	1.38	0.124597	S578
K.KS(phos)LRES(phos)FRK.L	M9NCX1	l(2)gl	Lethal (2) giant larvae isoform G OS=Drosophila melanogaster OX=7227 GN=l(2)gl PE=4 SV=1	-7.61813	-7.09249	-7.6104	-8.25338	-8.39805	-9.12706	-10.2421	-8.3139	1.38	0.0229474	S661,S665
K.NYSHFSNVS(phos)MEDN(d)NSDNES(phos)QIEPLFNSSPMASR.R	Q9VV52	RAF2	LD37257p OS=Drosophila melanogaster OX=7227 GN=RAF2 PE=1 SV=3	-8.15892	-6.31362	-5.68558	-6.70422	-5.61599	-10.7636	-6.19169	-9.80179	1.38	0.31176	S991,S1001
R.KVVISDPIQMPEVYSSTPGGT(phos)LYSTT(phos)PGGTKLIYER.A	Q9XZ56	Thor	4E-binding protein THOR OS=Drosophila melanogaster OX=7227 GN=Thor PE=1 SV=1	-1.93107	-2.40706	-3.45981	-2.57349	-2.52935	-1.74042	-2.26496	-9.35392	1.38	0.434251	T42,T47
K.IPPAQTASPDQEATPST(phos)PPPMSLQPGTSR.Q	Q9W2R3	sktl	LP03320p OS=Drosophila melanogaster OX=7227 GN=sktl PE=1 SV=2	2.48945	-0.416464	1.06745	0.526138	0.246724	3.94216	3.09104	-9.12327	1.38	0.634491	T65
R.FNKT(phos)ET(phos)Q(d)LDISVMEVDSSDHDEEEKTEK.V	Q8INM3	sle	Protein slender lobes OS=Drosophila melanogaster OX=7227 GN=sle PE=1 SV=1	-8.93296	-7.66376	-10.53	-7.36601	-10.1527	-9.34208	-9.93145	-10.604	1.38	0.0905744	T821,T823
R.NS(phos)NSNALKPPVATGGK.R	P46863	Klp61F	Kinesin-like protein Klp61F OS=Drosophila melanogaster OX=7227 GN=Klp61F PE=1 SV=2	-1.87508	-3.18418	-1.33703	-3.15305	-4.11173	-4.28972	-3.16296	-3.45009	1.37	0.029431	S1022
K.RKPLGIPSDS(phos)EDEEDELEQR.A	P34739	lds	Transcription termination factor 2 OS=Drosophila melanogaster OX=7227 GN=lds PE=1 SV=2	-3.5175	-2.88699	-3.23153	-2.34873	-2.94873	-3.06973	-7.63997	-3.80073	1.37	0.228377	S111
R.TAAQMGSHS(phos)PTASENK.S	P35820	Psc	Polycomb group protein Psc OS=Drosophila melanogaster OX=7227 GN=Psc PE=1 SV=2	-3.09598	3.60669	-1.20967	-1.71368	-1.23101	-1.66426	-1.0484	-3.95061	1.37	0.379464	S1267
R.S(phos)RS(phos)DS(phos)RDRH	A0A1B2AJY5		GEO01114p1 (Fragment) OS=Drosophila melanogaster OX=7227 PE=2 SV=1	-5.14364	-4.98401	-5.9473	-6.40401	-7.5276	-8.73186	-6.57796	-5.11491	1.37	0.117333	S128,S130,S132
R.YSSEDVS(phos)GNESSEAPNMTEVER.Q	Q9VGI5	Lk6	Lk6 kinase isoform B OS=Drosophila melanogaster OX=7227 GN=Lk6 PE=1 SV=1	-4.98246	-3.63446	-4.00206	-3.60663	-10.4045	-2.68997	-6.12546	-2.49574	1.37	0.449141	S18
K.S(phos)RPVSPITETEK.K	Q9NHW0	chm	Histone acetyltransferase OS=Drosophila melanogaster OX=7227 GN=chm PE=2 SV=1	-3.95214	-3.82301	-3.68652	-4.02189	-9.81763	-3.819	-4.01001	-3.32438	1.37	0.35834	S365
R.TAS(phos)MNASDNDMYIK.T	Q9VCX1	loco	Regulator of G-protein signaling loco OS=Drosophila melanogaster OX=7227 GN=loco PE=1 SV=2	-4.67145	-3.51508	-3.50837	-2.99405	-3.40889	-4.15633	-3.199	-9.41162	1.37	0.352188	S760
R.LLVPGSSSTTTTS(phos)SLRKS(phos)SPLK.A	P23226	Map205	205 kDa microtubule-associated protein OS=Drosophila melanogaster OX=7227 GN=Map205 PE=1 SV=2	-7.05009	-6.37257	-6.76407	-7.19912	-9.06922	-7.8704	-9.14481	-6.72573	1.36	0.0453915	S1081,S1086
R.QLS(phos)MHSLLAT(phos)DESSPVYEDFEQTPVK.M	M9PDR8	CdGAPr	Cd GTPase activating protein-related isoform D OS=Drosophila melanogaster OX=7227 GN=CdGAPr PE=1 SV=1	-4.07852	-4.41118	-2.79189	-1.21376	-7.80458	-2.7972	-3.578	-3.74488	1.36	0.303125	S1282,T1289
R.LFEDNLNDS(phos)VK.L	Q8IRH5	CG2199	Zinc finger protein CG2199 OS=Drosophila melanogaster OX=7227 GN=CG2199 PE=1 SV=1	-7.99718	-8.00431	-7.50809	-7.63033	-8.77159	-9.55725	-10.0078	-8.22492	1.36	0.0114349	S177
R.SVTASQLNTDS(phos)PAK.M	Q9VDW6	Dys	Dystrophin isoforms A/C/F/G/H OS=Drosophila melanogaster OX=7227 GN=Dys PE=1 SV=3	-3.4217	-4.19626	-4.30497	-4.39902	-6.14325	-5.02069	-5.0315	-5.56022	1.36	0.00516747	S3431
K.VKS(phos)PPPPVLSK.K	Q7YU85	cindr	SD08724p OS=Drosophila melanogaster OX=7227 GN=cindr PE=2 SV=1	-7.1505	-6.23494	-6.35336	-6.81679	-7.62201	-8.04811	-9.74146	-6.58064	1.36	0.0706872	S493
K.ELPLPEEAAHSVES(phos)PVETR.S	A1Z6I7	BubR1	Bub1-related kinase OS=Drosophila melanogaster OX=7227 GN=BubR1 PE=1 SV=1	-5.27273	-5.90405	-6.43148	-5.93337	-6.02126	-8.15291	-5.97623	-8.83301	1.36	0.0965713	S672
R.S(phos)PS(phos)PVQAAPVAAEPVLDTLEEEEQPEDK.T	A1ZBB4	SAF-A	Uncharacterized protein isoform B OS=Drosophila melanogaster OX=7227 GN=SAF-A PE=1 SV=1	2.74653	2.01726	3.02215	2.8548	1.39648	1.04151	1.01472	1.74031	1.36	0.00197077	S68,S70
K.HSLQHIAVGGGAGAGGDT(phos)PPESPTLPQR.R	Q9VB98	CG5521	Probable Rho GTPase-activating protein CG5521 OS=Drosophila melanogaster OX=7227 GN=CG5521 PE=1 SV=2	-2.64732	-3.01028	-3.07572	-2.75695	-10.0189	-3.1224	-2.1488	-1.65633	1.36	0.467503	T1946
R.SGDADPEVASTAS(phos)EKQR.S	Q86P46	CG8046	SD23581p (Fragment) OS=Drosophila melanogaster OX=7227 GN=CG8046 PE=2 SV=1	3.30981	2.05968	-0.154072	0.824139	-1.95744	-0.963631	2.21898	1.33612	1.35	0.267348	S28
R.APS(phos)QLS(phos)DPWSGTSSPQVDPWNPSAAPR.T	Q7KU93	lqf	Liquid facets isoform C OS=Drosophila melanogaster OX=7227 GN=lqf PE=1 SV=1	-7.05894	-5.05465	-7.54814	-7.37446	-7.80458	-10.6922	-6.32339	-7.62949	1.35	0.21507	S304,S307
N.TVTPQQSQATASSS(phos)PSSSNSTTTTR.A	B7Z090	Psn	Presenilin OS=Drosophila melanogaster OX=7227 GN=Psn PE=1 SV=1	-2.41667	-2.10263	-2.63922	-2.96718	-4.32078	-3.98464	-3.46691	-3.77253	1.35	0.00137349	S335
K.NIQQQLT(phos)PTK.Q	M9PDR5	spen	Split ends isoform F OS=Drosophila melanogaster OX=7227 GN=spen PE=1 SV=1	0.0826523	-2.05962	-4.39343	-0.740075	-10.1569	-1.67602	0.634356	-1.30503	1.35	0.58422	T4829
K.T(phos)TISPAPLPDPAEGNWFHR.T	Q5BHU8	capu	AT04667p OS=Drosophila melanogaster OX=7227 GN=capu PE=2 SV=1	-5.31846	-6.0894	-5.32713	-5.72993	-5.25341	-6.05	-9.21648	-7.32588	1.35	0.140891	T790
R.TQLTTS(phos)LSER.T	P13496	DCTN1-p150	Dynactin subunit 1 OS=Drosophila melanogaster OX=7227 GN=DCTN1-p150 PE=1 SV=2	-7.45455	-7.14702	-7.37604	-7.24228	-8.15622	-9.16596	-10.1605	-7.10135	1.34	0.0644664	S129
K.FSRS(phos)PVR.G	C1C547	SC35-RB	MIP01221p OS=Drosophila melanogaster OX=7227 GN=SC35-RB PE=2 SV=1	-2.07084	-2.74392	-2.47509	-3.47587	-4.04084	-3.90866	-4.00149	-4.19282	1.34	0.00293223	S168
K.NVPENS(phos)PPNQK.N	Q9VBX4	CG10057	LD36051p OS=Drosophila melanogaster OX=7227 GN=CG10057 PE=1 SV=2	-1.44553	3.94518	-1.01227	-1.12197	-0.624481	-1.17546	-1.37953	-1.82066	1.34	0.298756	S200
R.GLLENANS(phos)LER.T	Q24595	Xpc	DNA repair protein complementing XP-C cells homolog OS=Drosophila melanogaster OX=7227 GN=Xpc PE=1 SV=2	-6.3497	-4.69357	-4.85838	-5.10245	-8.97558	-4.83342	-4.97209	-7.59656	1.34	0.216992	S216
K.N(ac)LEEN(d)HSQLNPNAVAFVPGVGSQSSS(phos)PLPAAEDPLPGVQPR.P	P23226	Map205	205 kDa microtubule-associated protein OS=Drosophila melanogaster OX=7227 GN=Map205 PE=1 SV=2	-4.45534	-5.52397	-4.4533	-4.39543	-4.95456	-4.89074	-10.1955	-4.13256	1.34	0.336697	S254
R.GGGGGDS(phos)S(phos)DEDVTTR.N	Q9VYW4	Dmel\CG1703	LD04461p OS=Drosophila melanogaster OX=7227 GN=Dmel\CG1703 PE=1 SV=1	-3.34195	-2.43036	-2.23724	-2.49462	-3.99945	-5.11147	-3.33943	-3.42406	1.34	0.0202043	S47,S48
R.MTHSLS(phos)TPSGVDGTPSTPR.H	A0A0C4DHA1	Cdep	Chondrocyte-derived ezrin-like domain containing protein isoform F OS=Drosophila melanogaster OX=7227 GN=Cdep PE=1 SV=1	-4.69281	-4.95669	-4.83607	-5.74812	-5.89979	-5.03677	-10.0262	-4.63416	1.34	0.28126	S50
K.FSRS(phos)PVR.G	B5X530	CG33256-RA	IP21610p OS=Drosophila melanogaster OX=7227 GN=CG33256-RA PE=2 SV=1	-2.07084	-2.74392	-2.47509	-3.47587	-4.04084	-3.90866	-4.00149	-4.19282	1.34	0.00293223	S168
K.KLS(phos)PSES(phos)PESSK.K	M9PI97	MESR6	Misexpression suppressor of ras 6 isoform B OS=Drosophila melanogaster OX=7227 GN=MESR6 PE=1 SV=1	-2.97333	-2.84464	-2.58241	-3.46454	-9.26659	-2.82313	-3.13943	-1.94934	1.33	0.415157	S20,S24
R.ES(phos)PNQEFS(phos)Q(d)QQMDSPPLTPTPSTASVAVAVPTAASSVSEPAPER.G	Q9W552	Vps26	Vacuolar protein sorting-associated protein 26 OS=Drosophila melanogaster OX=7227 GN=Vps26 PE=2 SV=1	-4.69711	-4.33886	-6.22027	-4.69279	-9.32223	-10.1337	-2.97418	-2.85571	1.33	0.490451	S369,S375
R.NFS(phos)EEDREQQQQEQLR.R	P33438	Glt	Glutactin OS=Drosophila melanogaster OX=7227 GN=Glt PE=1 SV=2	-3.52132	-1.5329	-1.82108	-2.71163	-4.60132	-2.08782	-1.77336	-6.42797	1.33	0.261654	S813
K.S(phos)SSSLHQLPLFSLPQK.L	O16865	B4	B4 protein OS=Drosophila melanogaster OX=7227 GN=B4 PE=2 SV=1	-2.34731	-3.51841	-3.66867	-4.10148	-3.74082	-9.21774	-3.52672	-2.45563	1.33	0.382941	S892
R.ASS(phos)TS(phos)SGRHPAPPPIGLPQPQAQPLEAPK.I	Q9VX09	Arp8	Actin-related protein 8 OS=Drosophila melanogaster OX=7227 GN=Arp8 PE=1 SV=1	-0.916665	-2.93061	-2.51884	-2.23217	-1.49299	-10.2727	-1.35561	-0.811859	1.33	0.545049	S9,S11
R.TPMSAGMVLNPNT(phos)PPLQS(phos)PPYNK.L	Q8MSQ4	Mekk1	Mekk1 isoform B OS=Drosophila melanogaster OX=7227 GN=Mekk1 PE=2 SV=1	-1.45007	-1.37014	-1.52499	-1.21771	-2.26127	-2.82313	-4.199	-1.6006	1.33	0.0374108	T1160,S1165
R.T(phos)PPASIDS(phos)PTRPR.S	Q9W1R5	vir	Protein virilizer OS=Drosophila melanogaster OX=7227 GN=vir PE=1 SV=1	-1.10419	0.378414	2.93362	2.54344	-0.85209	1.70217	-1.75536	0.350731	1.33	0.268192	T289,S296
R.ERPLRT(phos)PS(phos)PTM(ox)PC(cam)PNPLISEIPK.D	X2JG22	prp4	Uncharacterized protein isoform D OS=Drosophila melanogaster OX=7227 GN=prp4 PE=1 SV=1	-3.39871	-4.45192	-3.98723	-4.49556	-10.1016	-4.10243	-4.16771	-3.28871	1.33	0.389426	T494,S496
K.SSS(phos)PKPGAMPSLK.L	A8DYI2	Ttd14	TRPL translocation defect 14 isoform C OS=Drosophila melanogaster OX=7227 GN=Ttd14 PE=1 SV=1	-2.65778	-2.87628	-2.6011	-2.63561	-3.96622	-3.83297	-4.17966	-4.07674	1.32	6.97e-05	S43
K.S(phos)PGFDHVNNK.N	Q9I7F7	Ack-like	Activated Cdc42 kinase-like OS=Drosophila melanogaster OX=7227 GN=Ack-like PE=1 SV=3	-0.864247	-0.719477	-0.528081	-0.902425	-2.4951	-1.89679	-2.01429	-1.87693	1.32	0.000309135	S692
K.SLNN(d)SSS(phos)PVGINR.R	Q7JVP4	Br140	Bromodomain-containing protein 140kD isoform A OS=Drosophila melanogaster OX=7227 GN=Br140 PE=1 SV=1	-0.185911	-1.93777	-4.4533	0.267911	-6.3359	-0.563369	-0.411949	-4.26493	1.32	0.448498	S886
K.ES(phos)VDEDAESEEDLEMAK.E	Q9VKB9	Rab3-GAP	Rab3 GTPase-activating protein regulatory subunit OS=Drosophila melanogaster OX=7227 GN=Rab3-GAP PE=1 SV=2	-3.27601	-2.81368	-1.54295	-2.03092	-1.89471	-9.09602	-2.52978	-1.42899	1.32	0.455839	S920
K.RRSS(phos)EDANEAFSK.E	Q9VID9	BEST:LD19244	Uncharacterized protein isoform B OS=Drosophila melanogaster OX=7227 GN=BEST:LD19244 PE=1 SV=3	-5.49476	-5.09876	-5.92829	-5.88226	-7.82146	-6.72444	-5.45087	-7.63904	1.31	0.0448027	S1044
K.ELAES(phos)HPNS(phos)PFHS(phos)R.T	Q9VQI6	Dmel\CG8814	LD25952p OS=Drosophila melanogaster OX=7227 GN=Dmel\CG8814 PE=2 SV=1	-1.23512	-1.02755	-0.792286	-1.02872	-2.29034	-2.83187	-2.32343	-1.88578	1.31	0.000788249	S130,S134,S138
K.SQS(phos)PPSEQIVR.L	Q9V3A7	glu	Structural maintenance of chromosomes protein OS=Drosophila melanogaster OX=7227 GN=glu PE=1 SV=1	-1.69734	-2.05962	-2.03947	-1.87917	-1.71644	-2.14661	-1.78245	-7.25075	1.31	0.323267	S1338
R.AEGDGEVDTDS(phos)IR.K	Q8MLV1	LBR	Lamin-B receptor OS=Drosophila melanogaster OX=7227 GN=LBR PE=1 SV=1	-8.21713	-7.20156	-7.30814	-8.12427	-8.38863	-8.2359	-9.41348	-10.049	1.31	0.0283689	S212
K.GDSPKS(phos)PQLAFQTSSS(phos)PSHRK.L	Q9VF04	Rbf2	RE32990p OS=Drosophila melanogaster OX=7227 GN=Rbf2 PE=2 SV=1	0.680939	0.367198	0.843871	0.178978	-1.38713	2.11999	-1.59871	-2.31743	1.31	0.195451	S345,S355
R.RS(phos)SASTNPAPIQIDPK.T	Q7KN79	LTV1	Protein LTV1 homolog OS=Drosophila melanogaster OX=7227 GN=LTV1 PE=1 SV=1	-2.88467	-3.66914	-3.75603	-3.94384	-4.67225	-4.92776	-4.81097	-5.08198	1.31	0.0014891	S370
K.HYKS(phos)PTPSGPPS(phos)PGR.N	D0IQK1	CG5798-RA	RH33842p OS=Drosophila melanogaster OX=7227 GN=CG5798-RA PE=2 SV=1	-2.41667	-1.52035	-1.59351	-1.92369	-2.96037	-3.47284	-1.80079	-4.46007	1.31	0.0483654	S483,S491
R.NVS(phos)DTSAFNK.T	Q9VJ30	Nak	Numb-associated kinase isoform A OS=Drosophila melanogaster OX=7227 GN=Nak PE=1 SV=2	-0.787589	-1.13508	-1.1638	-1.26603	-2.44521	-2.10892	-2.38437	-2.66072	1.31	0.000239166	S513
P.V(ac)GGLPETAT(phos)EQ(d)LER.F	A1Z9J3	shot	Short stop isoform H OS=Drosophila melanogaster OX=7227 GN=shot PE=1 SV=1	-3.8941	-2.72459	-2.76004	-3.02144	-6.10143	-4.46909	-3.82592	-3.23116	1.31	0.0749615	T7675
R.GAETVTPPDSDY(phos)DSSDIEDLDDTK.M	C1C5B1	cact-RB	RE25277p OS=Drosophila melanogaster OX=7227 GN=cact-RB PE=2 SV=1	-3.13344	-2.98707	-3.6183	-3.67022	-4.67609	-4.17401	-3.75446	-6.04016	1.31	0.0325139	Y466
N.NS(phos)QQSTGTVASTGTTPSKENEAPAAAASDSTGETPTKK.H	Q9VHC8	Dmel\CG8149	LD31448p OS=Drosophila melanogaster OX=7227 GN=Dmel\CG8149 PE=1 SV=1	-3.7938	-4.86073	-5.40381	-5.7573	-9.80477	-4.73172	-5.08445	-5.38427	1.3	0.298278	S123
K.GPANVANTAS(phos)PLKAHESSGKR.A	O61345	peng	Protein penguin OS=Drosophila melanogaster OX=7227 GN=peng PE=2 SV=1	-5.92906	-5.66423	-8.17395	-6.61976	-6.77131	-7.84752	-8.76683	-8.22133	1.3	0.0843587	S18
R.LQQITQIS(phos)PSGR.Y	M9PEN1	Dmel\CG3967	Alpha-tubulin N-acetyltransferase OS=Drosophila melanogaster OX=7227 GN=Dmel\CG3967 PE=3 SV=1	-3.73503	-3.81277	-3.70864	-3.77353	-6.14325	-4.31157	-4.66269	-5.11075	1.3	0.0114044	S254
R.SAEEPEDC(cam)PDC(cam)QC(cam)LS(phos)PVTSIDDILSER.R	Q9W009	Dmel\CG1146	GH12037p OS=Drosophila melanogaster OX=7227 GN=Dmel\CG1146 PE=2 SV=1	0.954238	1.10133	1.45441	1.19515	-0.148007	0.22687	-0.465814	-0.0990115	1.3	0.000405969	S271
K.QSGAAPISEAIEEIIAENYDDDDKSGPYPYKEDTS(phos)PEPK.R	Q9VBY6	PQBP1	LD40504p OS=Drosophila melanogaster OX=7227 GN=PQBP1 PE=2 SV=1	0.444722	0.652339	0.102802	0.54959	0.632854	-2.09833	-0.122314	-1.88135	1.3	0.0759973	S55
R.NINSS(phos)EPIFHLR.S	Q7JZ25	ClC-b	Chloride channel protein OS=Drosophila melanogaster OX=7227 GN=ClC-b PE=1 SV=1	-5.3318	-4.70111	-5.16819	-5.17439	-5.86438	-6.69861	-6.07994	-6.95104	1.3	0.00288893	S97
R.GET(phos)PEPTT(phos)PSS(phos)VKR.T	Q8INM3	sle	Protein slender lobes OS=Drosophila melanogaster OX=7227 GN=sle PE=1 SV=1	-8.85386	-6.91902	-6.53406	-6.97483	-8.25363	-8.80161	-7.22495	-10.1946	1.3	0.124107	T68,T73,S76
R.IYS(phos)DS(phos)EEEKEYQER.R	Q5LJZ2	Set1	Histone-lysine N-methyltransferase SETD1 OS=Drosophila melanogaster OX=7227 GN=Set1 PE=1 SV=1	-9.12392	1.01053	0.975838	0.184981	-5.57964	-2.05673	-1.656	-2.82985	1.29	0.604135	S1090,S1092
Y.PQS(phos)EPET(phos)EHQVIEIQT(phos)QQAPVPR.Q	B8A408	hts-RF	MIP03122p (Fragment) OS=Drosophila melanogaster OX=7227 GN=hts-RF PE=2 SV=1	2.41655	-4.60255	1.88206	1.82396	-4.21386	-4.08142	2.68017	1.96932	1.29	0.588327	S135,T139,T148
K.MRRPS(phos)SEELVK.V	A0A0B4LFQ2	Incenp	Inner centromere protein isoform C OS=Drosophila melanogaster OX=7227 GN=Incenp PE=1 SV=1	-2.41667	-2.2263	-2.36718	-2.47555	-3.29255	-4.46909	-3.38022	-3.5173	1.29	0.00252006	S164
K.TVSS(phos)PVSK.Q	Q9NH51	lqfR	Epsin-like protein OS=Drosophila melanogaster OX=7227 GN=lqfR PE=2 SV=1	3.29124	-0.949747	1.83938	1.01313	1.82281	0.942424	0.210931	-2.93621	1.29	0.333764	S269
R.SGDADPEVASTAS(phos)EK.Q	Q86P46	CG8046	SD23581p (Fragment) OS=Drosophila melanogaster OX=7227 GN=CG8046 PE=2 SV=1	3.09106	2.66525	1.29297	0.595381	-0.955986	-0.997666	1.68854	2.75626	1.29	0.245698	S28
R.LADTPGHSHS(phos)PHEEAAGEDLVLR.Q	U3PU53	sqz-RA	FI22455p1 OS=Drosophila melanogaster OX=7227 GN=sqz-RA PE=2 SV=1	-0.016498	-2.74392	-1.8941	-2.52369	-2.04764	-4.55916	-0.255125	-5.47757	1.29	0.326114	S402
K.SKDLSDPDS(phos)GNDITPETSLTK.D	Q7KQM6	CG11148	GIGYF family protein CG11148 OS=Drosophila melanogaster OX=7227 GN=CG11148 PE=1 SV=2	-3.46146	-4.68234	-3.84456	-3.78053	-5.14322	-5.12001	-5.62951	-5.05376	1.29	0.00314432	S408
K.S(phos)PGFDHVNNKNEITEM(ox)SAK.L	Q9I7F7	Ack-like	Activated Cdc42 kinase-like OS=Drosophila melanogaster OX=7227 GN=Ack-like PE=1 SV=3	-9.02487	-2.54434	0.861043	0.478059	-4.5689	-3.25725	-4.22353	-3.32438	1.29	0.559223	S692
R.RPS(phos)DGLLAR.V	Q9VMH4	Sec12	FI09914p OS=Drosophila melanogaster OX=7227 GN=Sec12 PE=2 SV=1	-3.06781	-3.43751	-4.21874	-3.40382	-3.44766	-3.30516	-3.32608	-9.21395	1.29	0.371031	S9
R.SEAHT(phos)PDS(phos)PASVC(cam)ER.D	Q9W462	Usp30	Ubiquitin carboxyl-terminal hydrolase 30 homolog OS=Drosophila melanogaster OX=7227 GN=Usp30 PE=2 SV=1	-0.362846	0.389543	-0.324131	-0.395222	-0.904507	-3.21089	-0.671955	-1.06991	1.29	0.0589177	T227,S230
K.VNNVT(phos)PNSK.T	Q9VK59	Dmel\CG5787	LD23647p OS=Drosophila melanogaster OX=7227 GN=Dmel\CG5787 PE=1 SV=2	-8.3411	-5.62787	-8.65894	-8.59136	-9.3653	-8.90412	-8.79009	-9.3245	1.29	0.101406	T540
K.SQENSSVT(phos)PQQTK.K	A0A0B4LFQ2	Incenp	Inner centromere protein isoform C OS=Drosophila melanogaster OX=7227 GN=Incenp PE=1 SV=1	-3.04018	-1.98298	-3.26244	-3.1216	-5.09113	-2.07219	-4.53436	-4.87738	1.29	0.106977	T62
R.STS(phos)KENLDLASSIATK.K	Q9W3D1	Caf1-180	Chromatin assembly factor 1 p180 subunit OS=Drosophila melanogaster OX=7227 GN=Caf1-180 PE=1 SV=1	2.79287	1.43253	2.26086	2.2281	1.70345	1.97084	-0.783814	0.707879	1.28	0.0826205	S109
R.DTS(phos)SSSKS(phos)PTPERPPQPAMER.V	M9PHR5	Ect4	Ectoderm-expressed 4 isoform K OS=Drosophila melanogaster OX=7227 GN=Ect4 PE=1 SV=1	-4.4923	-2.90864	-3.1426	-3.38236	-6.64427	-4.17624	-3.61972	-4.62227	1.28	0.104094	S1606,S1611
R.LGNAVDHDLLPGPPGVDEKS(phos)GNENC(cam)EPR.S	Q9V468	CG9776	Zinc finger matrin-type protein CG9776 OS=Drosophila melanogaster OX=7227 GN=CG9776 PE=1 SV=1	-3.76638	-5.87819	-4.90406	-6.39682	-6.78284	-8.54081	-5.97623	-4.76202	1.28	0.197586	S35
R.TS(phos)AELDELLDVQPDFAVDESQPEETK.L	Q9VXK5	Dmel\CG8939	Putative rRNA methyltransferase OS=Drosophila melanogaster OX=7227 GN=Dmel\CG8939 PE=1 SV=1	-0.0232441	-8.47186	-6.15253	-8.31711	-6.97526	-7.35678	-7.05152	-6.70051	1.28	0.500498	S418
R.KHS(phos)ESEQQTPVKK.E	Q9VM69	nop5	CG10206-PA OS=Drosophila melanogaster OX=7227 GN=nop5 PE=1 SV=2	-4.08981	-2.05357	-3.84679	-4.57855	-4.80022	-4.72519	-5.14409	-5.02608	1.28	0.0438061	S447
K.TS(phos)PSLAQPANGIK.E	E1JIM0	nsl1	Non-specific lethal 1 isoform E OS=Drosophila melanogaster OX=7227 GN=nsl1 PE=1 SV=1	1.06174	-3.3387	0.959987	0.94402	0.308625	-2.34513	1.82938	-5.29192	1.28	0.482781	S700
K.ISLMRTT(phos)N(d)NTLGR.S	X2JIR4	C3G	C3G guanyl-nucleotide exchange factor isoform L OS=Drosophila melanogaster OX=7227 GN=C3G PE=4 SV=1	1.41357	1.23073	1.65478	1.1651	-0.63144	1.3035	-0.223849	-0.086197	1.28	0.0176944	T128
R.QDS(phos)NEDDLLR.E	Q9W3M3	Ubr3	E3 ubiquitin-protein ligase Ubr3 OS=Drosophila melanogaster OX=7227 GN=Ubr3 PE=1 SV=4	-0.994069	-1.94894	-1.65078	-2.13176	-2.23984	-2.06186	-5.28159	-2.20234	1.27	0.136423	S1168
R.SM(ox)S(phos)QT(phos)PPMPTR.S	Q8INM3	sle	Protein slender lobes OS=Drosophila melanogaster OX=7227 GN=sle PE=1 SV=1	-7.03257	-7.17194	-7.12172	-7.62696	-10.5904	-7.87907	-7.75544	-7.8065	1.27	0.0929192	S156,T158
L.EES(phos)QFESPPLTQEK.V	Q9W3D6	Dmel\CG12065	Uncharacterized protein isoform A OS=Drosophila melanogaster OX=7227 GN=Dmel\CG12065 PE=1 SV=1	-1.23121	-5.47794	-5.73426	-2.79189	-5.66845	-5.83784	-4.99725	-3.82437	1.27	0.275232	S243
R.SNGS(phos)PVPK.V	M9NF18	FBXL5	Uncharacterized protein isoform D OS=Drosophila melanogaster OX=7227 GN=FBXL5 PE=1 SV=1	-2.8603	-3.02203	-2.97478	-2.99405	-4.72685	-3.44574	-4.90308	-3.83977	1.27	0.0077322	S394
R.E(ac)N(d)AGS(phos)DDENAKPLSHAQR.Y	Q8SY39	CG6994	ATP-dependent RNA helicase OS=Drosophila melanogaster OX=7227 GN=CG6994 PE=1 SV=1	-3.5137	-3.71227	-4.54803	-4.59903	-6.62934	-6.33816	-3.97002	-4.52223	1.27	0.0955292	S736
R.IST(phos)PS(phos)PLPVR.S	P18502	ptc	Protein patched OS=Drosophila melanogaster OX=7227 GN=ptc PE=2 SV=2	-2.22561	-1.89933	-1.7104	-1.70256	-2.23277	-2.13574	-2.33007	-5.92615	1.27	0.180083	T1124,S1126
K.LRT(phos)SPNEQQK.D	Q95RH7	Rab35	LD28840p OS=Drosophila melanogaster OX=7227 GN=Rab35 PE=2 SV=1	-3.48734	-1.89393	-3.17024	-4.05547	-3.78772	-3.93857	-4.9392	-5.02217	1.27	0.0456528	T122
K.EEAAAT(phos)PPAAEQNLQPVPATGQE	Q960S3	btz	LD37788p OS=Drosophila melanogaster OX=7227 GN=btz PE=2 SV=1	-3.96767	-2.98707	-2.97478	-3.135	-5.14322	-4.08979	-5.39964	-3.5173	1.27	0.0308825	T545
K.KEDNS(phos)EKDEENS(phos)EDGDEPEDEADEKAS(phos)DEESEK.K	A1ZAK4	Dek	Dek isoform A OS=Drosophila melanogaster OX=7227 GN=Dek PE=1 SV=1	-2.04315	-1.94894	-2.07823	-2.42897	-3.17402	-3.94995	-3.2739	-3.13301	1.26	0.00109807	S112,S119,S134
K.Y(ac)AIN(d)EDMGQEGS(phos)PPLK.M	Q9VP57	pzg	LD15904p OS=Drosophila melanogaster OX=7227 GN=pzg PE=1 SV=1	-7.01525	-6.47349	-7.10029	-6.61308	-9.44105	-6.61171	-9.36618	-6.80414	1.26	0.129371	S175
R.S(phos)M(ox)KPANNNGSVPSAAR.E	Q6AWQ1	SRm160	RE71183p OS=Drosophila melanogaster OX=7227 GN=SRm160 PE=2 SV=1	1.33002	-1.52871	0.4028	0.295916	-2.96037	-2.65076	0.46236	0.616771	1.26	0.265306	S175
K.S(phos)PAFDKK.K	Q9VUM0	Msh6	Probable DNA mismatch repair protein Msh6 OS=Drosophila melanogaster OX=7227 GN=Msh6 PE=1 SV=2	-5.25357	-5.08884	-5.13513	-5.90249	-7.27194	-5.18575	-4.57799	-9.40272	1.26	0.25292	S25
K.ELPDSDSLN(d)VAPPEGFS(phos)DEEPEER.Q	Q9VNH5	Dmel\CG2091	GH04919p OS=Drosophila melanogaster OX=7227 GN=Dmel\CG2091 PE=1 SV=1	-9.58923	-5.09379	-5.66184	-4.70605	-8.45485	-6.81725	-6.60349	-8.22852	1.26	0.29447	S345
K.S(phos)LPEVTGAPK.G	Q9W3D1	Caf1-180	Chromatin assembly factor 1 p180 subunit OS=Drosophila melanogaster OX=7227 GN=Caf1-180 PE=1 SV=1	0.504571	-0.319034	0.132803	-0.329571	-0.678707	-0.316345	-2.80726	-1.25542	1.26	0.0536545	S476
K.LSQLLTS(phos)NEKR.R	M9PFG7	Klc	Kinesin light chain isoform C OS=Drosophila melanogaster OX=7227 GN=Klc PE=4 SV=1	-5.0525	-4.68982	-4.25676	-5.22443	-9.99942	-4.71221	-5.16295	-4.39542	1.26	0.334989	S486
R.AKYNQQNS(phos)SNLNAC(cam)MGSTDPNK.V	Q9VI56	Dmel\CG1943	GEO05313p1 OS=Drosophila melanogaster OX=7227 GN=Dmel\CG1943 PE=1 SV=1	-7.86721	-7.47624	-8.11259	-7.88817	-9.51089	-8.54081	-9.76047	-8.55927	1.26	0.0073265	S52
K.ADGKS(phos)DDEGGT(phos)TPTQATIDNGN(d)GSVR.F	A0A0B4LHN0	RhoGAP92B	Rho GTPase activating protein at 92B isoform D OS=Drosophila melanogaster OX=7227 GN=RhoGAP92B PE=1 SV=1	-0.849185	-2.19937	-0.171426	-0.918424	-2.5823	-1.12622	-3.13943	-2.3477	1.26	0.0576742	S546,T552
R.MPGSRPSS(phos)APAEPNAK.A	Q9VDD2	SNF4Agamma	LD22662p OS=Drosophila melanogaster OX=7227 GN=SNF4Agamma PE=1 SV=2	0.234587	-1.38144	-1.27194	-1.49638	-0.669129	-2.07219	-1.44294	-4.78172	1.26	0.202942	S573
R.LNS(phos)LGPNASTESEMASYLHR.K	Q24145	Shark	Tyrosine-protein kinase Shark OS=Drosophila melanogaster OX=7227 GN=Shark PE=1 SV=2	-4.37376	-5.43961	-5.20203	-4.72845	-6.31186	-5.99397	-6.12546	-6.3573	1.26	0.00197774	S618
K.SNSQSNENSEPVVNS(phos)DDEDNYSGIGRK.T	Q9VN03	Suv3	ATP-dependent RNA helicase SUV3 homolog mitochondrial OS=Drosophila melanogaster OX=7227 GN=Suv3 PE=2 SV=3	1.17658	2.01726	0.589514	1.42809	-0.22661	0.604456	0.919885	-1.1344	1.26	0.043003	S745
K.QAEEIT(phos)QPELQ(d)ELPAKVESPTEPEVISEVVVEQEQNKPQKPSR.K	M9MRJ4	Msp300	Muscle-specific protein 300 kDa isoform G OS=Drosophila melanogaster OX=7227 GN=Msp300 PE=1 SV=1	-2.94744	-3.84372	-2.64892	-2.48505	-1.85616	-10.106	-2.42647	-2.57946	1.26	0.506993	T1715
R.NSALQLDLDDDSASLQ(d)SQDIDKLPGT(phos)PTSILR.D	Q9W179	Slik	Sterile20-like kinase isoform B OS=Drosophila melanogaster OX=7227 GN=Slik PE=1 SV=2	0.432448	-0.644914	0.0795173	0.514268	-0.171479	0.0237311	-0.0519659	-4.43907	1.26	0.261498	T355
M.A(ac)TVQMKPDYAASEVY(phos)STASEPPPAYKR.Q	X2JCI8	Msr-110	Msr-110 isoform D OS=Drosophila melanogaster OX=7227 GN=Msr-110 PE=1 SV=1	2.38823	-2.72459	1.70795	-10.3036	-3.03222	-2.97952	-3.60353	-4.35551	1.26	0.650898	Y25
R.S(phos)HETIEFEK.D	M9PE28	tho2	Tho2 isoform C OS=Drosophila melanogaster OX=7227 GN=tho2 PE=1 SV=1	-6.1241	-6.30212	-5.99593	-5.82324	-9.47173	-7.12933	-6.07994	-6.61557	1.26	0.111911	S1505
R.SPRPLS(phos)EANNC(cam)DAMIEAPK.F	F3YDC5	CG5004-RD	SD11546p OS=Drosophila melanogaster OX=7227 GN=CG5004-RD PE=2 SV=1	4.24107	3.15223	4.87982	3.08689	2.4077	6.71471	0.555433	0.663044	1.25	0.390199	S118
R.TLC(cam)PPPELMELS(phos)DSESQGGVETGGR.R	Q86NP0	S6kII	Non-specific serine/threonine protein kinase OS=Drosophila melanogaster OX=7227 GN=S6kII PE=2 SV=1	-0.532922	-0.935789	0.215235	-0.454641	-3.31628	-0.342662	-2.24598	-0.803445	1.25	0.102297	S144
K.S(phos)PGLGSGLGGGSSSSSSR.M	Q9VWN4	Flacc	Fl(2)d-associated complex component OS=Drosophila melanogaster OX=7227 GN=Flacc PE=1 SV=1	-0.32902	0.595804	0.773067	0.526138	0.661604	0.980384	-4.8756	-0.192049	1.25	0.355378	S231
R.S(phos)IRPIDSLT(phos)PSK.I	Q8SX89	kuk	Kugelkern isoform A OS=Drosophila melanogaster OX=7227 GN=kuk PE=1 SV=1	-7.02605	-6.42153	-6.47219	-7.04279	-7.4183	-7.10708	-7.33614	-10.1	1.25	0.104441	S359,T367
K.YAGS(phos)DDDAGFK.N	Q9VA00	Zwilch	Protein zwilch OS=Drosophila melanogaster OX=7227 GN=Zwilch PE=1 SV=1	-2.7332	-2.99863	-2.40773	-3.27464	-4.32378	-5.94761	-2.50701	-3.61699	1.25	0.112315	S491
K.DGRLS(phos)PIDER.D	Q8IPK8	Bsg25D	Blastoderm-specific gene 25D isoform C OS=Drosophila melanogaster OX=7227 GN=Bsg25D PE=4 SV=1	1.382	0.767725	0.515534	1.20257	-0.0909435	-1.15063	1.741	-1.64501	1.25	0.122451	S643
R.WLNMHPGWDWIDDEEDS(phos)C(cam)GS(phos)NDDHKPK.V	P25439	brm	ATP-dependent helicase brm OS=Drosophila melanogaster OX=7227 GN=brm PE=1 SV=2	-7.36134	-5.90405	-6.00586	-5.45889	-5.49598	-6.86384	-10.5895	-6.79077	1.25	0.279818	S696,S699
R.S(phos)INSSPTNMNR.S	A0A0B7P9G0	uex	Unextended isoform E OS=Drosophila melanogaster OX=7227 GN=uex PE=1 SV=1	-7.499	-1.91021	-2.04586	-1.93016	-2.93719	-7.62936	-6.18204	-1.63378	1.25	0.506401	S754
R.SLT(phos)PESR.S	Q8IPK8	Bsg25D	Blastoderm-specific gene 25D isoform C OS=Drosophila melanogaster OX=7227 GN=Bsg25D PE=4 SV=1	-0.0836575	-0.773071	-0.693714	-0.760118	-2.15719	-1.58451	0.199441	-3.76762	1.25	0.147278	T567
R.VNTSS(phos)PDLGIESDAGR.I	A0A0B4K863	cnn	Centrosomin isoform L OS=Drosophila melanogaster OX=7227 GN=cnn PE=1 SV=1	7.51829	6.3916	6.50287	6.29845	5.867	1.70217	7.5563	6.61906	1.24	0.337188	S1251
R.KNS(phos)GDGVASSTNDLLQSQHSITFQLK.R	Q9VPB9	Pex16	Peroxisomal membrane protein PEX16 OS=Drosophila melanogaster OX=7227 GN=Pex16 PE=1 SV=1	-2.08489	-2.00613	-0.681231	-0.745773	-10.1918	0.644412	-0.338089	-0.57861	1.24	0.61231	S160
K.EQQPQPGDPANSS(phos)STGQGPESTVVEAIIVLPHEDAVAK.I	B7Z0I8	CG14896	Uncharacterized protein OS=Drosophila melanogaster OX=7227 GN=CG14896 PE=1 SV=1	-7.41711	-7.03232	-6.34074	-9.82686	-10.6612	-6.62381	-6.93835	-11.3479	1.24	0.377526	S2227
R.DNTQVQDMDEAS(phos)S(phos)DEDTPTTK.L	Q9VEP9	Sf3a1	GH03554p OS=Drosophila melanogaster OX=7227 GN=Sf3a1 PE=1 SV=1	-9.72762	-3.38346	-2.67838	-2.95393	-4.86436	-5.36707	-6.35557	-7.10963	1.24	0.464422	S372,S373
R.SAS(phos)ATEHNLSSLR.N	Q8ST50	mdy	O-acyltransferase OS=Drosophila melanogaster OX=7227 GN=mdy PE=2 SV=1	2.51004	1.56114	1.50989	1.24628	1.25272	1.73584	-2.09687	0.969583	1.24	0.180902	S39
K.TS(phos)PSLAQPAN(d)GIK.E	E1JIM0	nsl1	Non-specific lethal 1 isoform E OS=Drosophila melanogaster OX=7227 GN=nsl1 PE=1 SV=1	-3.87689	-2.49439	-3.80069	-4.34267	-7.28125	-5.51133	-3.65767	-3.01174	1.24	0.235449	S700
M.A(ac)EQ(d)NDS(phos)NGNYDDGEEITEPEQLR.K	E1JIK0	Hrb87F	Heterogeneous nuclear ribonucleoprotein at 87F isoform C OS=Drosophila melanogaster OX=7227 GN=Hrb87F PE=1 SV=1	-3.91402	-4.4551	-3.73317	-3.91788	-4.10655	-4.56207	-3.96174	-8.36846	1.24	0.239393	S8
C.N(ac)VET(phos)KVVDEIDDQVNNK.K	Q8IRH5	CG2199	Zinc finger protein CG2199 OS=Drosophila melanogaster OX=7227 GN=CG2199 PE=1 SV=1	-8.62648	-7.68154	-9.0693	-7.36882	-9.24021	-8.52257	-11.135	-8.79515	1.24	0.10155	T345
K.SANGSN(d)AVTPTTSANTS(phos)PISGR.A	M9PB54	homer	Homer isoform F OS=Drosophila melanogaster OX=7227 GN=homer PE=1 SV=1	1.43833	-0.629104	1.63994	0.785154	-1.18592	-1.15886	0.870024	-0.219771	1.23	0.100922	S136
R.ES(phos)ESAAGTPVNADQPGS(phos)PNAK.S	X2JE07	Dmel\CG1677	Uncharacterized protein isoform D OS=Drosophila melanogaster OX=7227 GN=Dmel\CG1677 PE=1 SV=1	-1.23904	-0.873265	-0.835893	-0.723114	-2.75391	-2.38962	-1.58673	-1.87693	1.23	0.00357762	S137,S152
R.LQS(phos)PTSHDANLATC(cam)K.T	Q6IHY4	Dmel\CG34174	HDC00336 OS=Drosophila melanogaster OX=7227 GN=Dmel\CG34174 PE=2 SV=1	-3.86231	-2.96422	-3.15636	-3.56574	-5.91782	-3.65638	-4.07773	-4.83218	1.23	0.0433986	S34
K.KEGDLEEDIDM(ox)IENENEEEGS(phos)DDGAE	Q9VG73	CG5641	Interleukin enhancer-binding factor 2 homolog OS=Drosophila melanogaster OX=7227 GN=CG5641 PE=2 SV=1	-6.55491	-5.80329	-5.81051	-4.23616	-5.92692	-10.1843	-6.19169	-5.02217	1.23	0.314576	S392
R.KRLS(phos)TELAQSQDPLPPGQQPSSGNR.G	Q8MZ09	hrg	RE25878p OS=Drosophila melanogaster OX=7227 GN=hrg PE=2 SV=1	-2.33048	-2.0356	-2.34338	-3.26316	-10.3589	-1.63335	-1.79618	-1.12127	1.23	0.561755	S557
R.DVEYKPPFGLDS(phos)PSK.L	Q9VFK5	Afti	Aftiphilin isoform B OS=Drosophila melanogaster OX=7227 GN=Afti PE=2 SV=3	3.49235	6.9754	7.30337	6.41874	4.92498	5.15072	3.58838	5.61907	1.23	0.211247	S727
K.EN(d)GAGS(phos)PAKPDDNKPTTN(d)GTNSPSK.S	A1Z909	Nol1Nt	LD11307p OS=Drosophila melanogaster OX=7227 GN=Nol1Nt PE=1 SV=1	-3.32185	-9.01255	-4.17608	-6.25876	-6.21949	-6.64832	-10.4672	-4.3457	1.23	0.478424	S797
R.S(phos)VQATQLDLTSPYWK.Q	Q9VM75	l(2)k09022	HEAT repeat-containing protein 1 homolog OS=Drosophila melanogaster OX=7227 GN=l(2)k09022 PE=2 SV=2	-6.1475	-6.53412	-6.1636	-5.56773	-9.41442	-6.91793	-6.64266	-6.32804	1.22	0.11397	S1155
K.S(phos)APVSVNR.S	A0A0B4K7T7	RhoGEF2	Rho guanine nucleotide exchange factor 2 isoform G OS=Drosophila melanogaster OX=7227 GN=RhoGEF2 PE=1 SV=1	-2.17216	-5.68649	-4.94645	-2.8277	-4.52331	-4.59444	-4.21859	-7.17238	1.22	0.257872	S1361
K.EKPAADLES(phos)SVLT(phos)DEERHER.K	P35600	Gnf1	Replication factor C subunit 1 OS=Drosophila melanogaster OX=7227 GN=Gnf1 PE=1 SV=2	-7.89465	-6.47608	-8.21943	-8.10071	-7.82826	-8.21745	-9.1703	-10.3739	1.22	0.0987962	S194,T198
R.KDTS(phos)PSASIEGAGSSGNEAKS(phos)ADGDQQAGEK.G	A0A0B4K7Y7	larp	La related protein isoform G OS=Drosophila melanogaster OX=7227 GN=larp PE=1 SV=1	-8.36284	-8.13294	-9.47758	-8.93028	-10.018	-9.62372	-8.97079	-11.1601	1.22	0.0496465	S220,S237
K.GPLDLHIMPIESLPAES(phos)PLK.S	A0A0B4KF57	aux	Auxilin isoform D OS=Drosophila melanogaster OX=7227 GN=aux PE=1 SV=1	-7.22321	-7.19091	-6.41816	-6.82641	-7.41574	-6.72444	-8.261	-10.1451	1.22	0.125726	S341
K.WSS(phos)MDNISQGGPR.R	Q9VKF0	CycY	Cyclin Y isoform A OS=Drosophila melanogaster OX=7227 GN=CycY PE=1 SV=1	5.24982	4.45594	5.55656	4.40878	3.66593	3.35721	3.81234	3.93811	1.22	0.00567347	S390
R.SHELSFSDAPS(phos)NESLYR.N	Q9VC45	asp	Protein abnormal spindle OS=Drosophila melanogaster OX=7227 GN=asp PE=1 SV=3	-5.57971	-0.908271	-2.20115	-1.19805	-5.19177	-1.48459	-4.77063	-3.32438	1.22	0.357533	S502
K.KLS(phos)LS(phos)GGDTTEK.F	X2JDP6	Ndf	Uncharacterized protein isoform C OS=Drosophila melanogaster OX=7227 GN=Ndf PE=4 SV=1	-9.46464	-8.08483	-8.65269	-8.66546	-8.76923	-9.70793	-10.8193	-10.4329	1.22	0.0450362	S9,S11
R.EKT(phos)PEKRPEAEPEIDSR.Q	Q500Y6		SD07352p OS=Drosophila melanogaster OX=7227 PE=2 SV=1	-0.852185	-1.5886	-1.7568	-1.48204	-1.61641	-2.1853	-2.3706	-4.38785	1.22	0.077319	T281
R.SMAEDGS(phos)PS(phos)PEKEKPEKLPF.I	E1JIP3	WRNexo	WRN exonuclease isoform B OS=Drosophila melanogaster OX=7227 GN=WRNexo PE=4 SV=1	2.3561	0.801448	1.7954	2.02557	0.479829	0.367196	0.528136	0.751362	1.21	0.0087721	S111,S113
K.AQSS(phos)PVPNSLEELGK.G	Q9XTP7	jumu	DOMINA protein OS=Drosophila melanogaster OX=7227 GN=jumu PE=2 SV=1	2.96678	2.3319	2.11103	5.16009	1.98704	2.12565	3.42533	0.191468	1.21	0.212242	S251
R.MLQKS(phos)DDS(phos)ADEK.E	Q59E34	Mi-2	Mi-2 isoform B OS=Drosophila melanogaster OX=7227 GN=Mi-2 PE=1 SV=1	-5.35885	-4.76285	-4.71713	-5.18674	-5.88198	-6.50716	-6.23095	-6.26199	1.21	0.00103611	S312,S315
D.TSAPQLSSEADS(phos)PVAK.L	P23226	Map205	205 kDa microtubule-associated protein OS=Drosophila melanogaster OX=7227 GN=Map205 PE=1 SV=2	-7.72317	-7.73314	-7.89403	-7.60359	-10.4565	-8.96438	-8.51833	-7.87256	1.21	0.0508438	S497
R.RDGS(phos)DGSVSSAGAR.R	M9PIC3	ptdss1	Uncharacterized protein isoform B OS=Drosophila melanogaster OX=7227 GN=ptdss1 PE=1 SV=1	-1.76923	3.87763	-2.46649	-1.89808	-4.89083	-2.77174	-2.53745	3.11503	1.21	0.576434	S55
R.GNAS(phos)PTTTSAQR.E	M9PG55	Dmel\CG10600	Uncharacterized protein isoform C OS=Drosophila melanogaster OX=7227 GN=Dmel\CG10600 PE=1 SV=1	-2.04315	0.724431	-2.20115	-2.41075	-1.77174	-2.15756	-2.06882	-4.75876	1.21	0.234834	S68
K.AS(phos)EPTVSFAADKDEK.K	O16043	Df31	Anon1A4 OS=Drosophila melanogaster OX=7227 GN=Df31 PE=1 SV=1	-8.54345	-8.0967	-8.62795	-8.4125	-9.42905	-9.83701	-9.76547	-9.50221	1.21	0.00038234	S78
K.S(phos)QQGEELVK.V	Q9VYY2	Spase25	Signal peptidase complex subunit 2 OS=Drosophila melanogaster OX=7227 GN=Spase25 PE=2 SV=1	-7.80265	-7.69352	-7.49684	-8.27959	-7.51931	-8.13895	-10.6775	-9.7965	1.21	0.121319	S9
M(ox)(ac)NNDSHKYS(phos)DAEEDEEDLR.S	Q9VTL5	RIOK1	Serine/threonine-protein kinase RIO1 OS=Drosophila melanogaster OX=7227 GN=RIOK1 PE=2 SV=1	-1.64438	-0.935789	-1.05996	-1.02179	-3.05698	-3.00897	-1.99832	-1.4129	1.2	0.0223446	S10
K.VSYS(phos)APNSPPT(phos)PHEQQEQK.Y	U3PU53	sqz-RA	FI22455p1 OS=Drosophila melanogaster OX=7227 GN=sqz-RA PE=2 SV=1	1.77608	0.274185	0.318293	-0.0120852	-0.0391328	-2.40259	1.86618	-1.86813	1.2	0.250927	S104,T111
K.S(phos)PANAAPGPSLPR.R	Q8SX63	BRWD3	LD40380p OS=Drosophila melanogaster OX=7227 GN=BRWD3 PE=2 SV=1	-2.7443	-3.22434	-2.59173	-1.65353	-5.62337	-3.32972	-3.03802	-3.04111	1.2	0.107473	S1223
R.DLDESQ(d)PLEDLDIES(phos)DIESIEELK.F	Q8I7Q3		ORF2 OS=Drosophila melanogaster OX=7227 PE=4 SV=1	-4.3946	-4.10847	-3.82466	-3.07782	-4.29698	-8.09114	-2.88341	-4.94241	1.2	0.284481	S124
R.RVS(phos)SDLDPWGR.L	Q9W3D3	Crag	DENN domain-containing protein Crag OS=Drosophila melanogaster OX=7227 GN=Crag PE=1 SV=3	-2.13515	-2.2888	-1.96496	-3.97563	-5.35417	-5.6162	-2.17847	-2.01583	1.2	0.265551	S1301
R.NHS(phos)RLT(phos)ELANMDEGEDEQNDFAYEK.Q	M9PEG6	ZnT63C	Zinc transporter 63C isoform F OS=Drosophila melanogaster OX=7227 GN=ZnT63C PE=1 SV=1	-1.86899	-1.39666	-1.69025	-1.33736	-2.02303	-1.78643	-5.47423	-1.82491	1.2	0.191915	S153,T156
R.ATS(phos)QAPPTASPSVR.R	Q9VWE6	CG14215	Protein ELYS homolog OS=Drosophila melanogaster OX=7227 GN=CG14215 PE=1 SV=2	-2.12061	-2.00613	-2.46649	-2.52369	-1.91155	-1.30037	-5.17247	-5.51555	1.2	0.271316	S1976
R.LTS(phos)LDRGNNTLLDYDDHGR.S	Q9VHC4	Dmel\CG8176	Uncharacterized protein isoform A OS=Drosophila melanogaster OX=7227 GN=Dmel\CG8176 PE=1 SV=3	-1.75793	-7.16358	-1.09927	-7.60029	-6.53029	-6.35823	-7.15532	-2.37861	1.2	0.538159	S498
R.SQS(phos)QDEELTSLR.Q	Q8IPK8	Bsg25D	Blastoderm-specific gene 25D isoform C OS=Drosophila melanogaster OX=7227 GN=Bsg25D PE=4 SV=1	2.72907	1.77992	1.33659	2.21349	0.661604	0.0714091	3.07384	-0.543155	1.2	0.166759	S538
K.QGGLGS(phos)MDIPLLADK.S	F6J6B9	CG1633	CG1633 (Fragment) OS=Drosophila melanogaster OX=7227 GN=CG1633 PE=4 SV=1	-4.48483	-4.23676	-4.47727	-4.95259	-4.22505	-4.14976	-10.1705	-4.40812	1.2	0.404362	S76
R.RAS(phos)SGAETLR.V	E1JGN0	par-1	Non-specific serine/threonine protein kinase OS=Drosophila melanogaster OX=7227 GN=par-1 PE=1 SV=1	-2.50833	-3.23797	-2.65867	-3.47776	-4.68378	-3.03903	-4.31549	-4.64615	1.2	0.0261283	S854
K.FGTAS(phos)PQAVKK.M	Q95V18	PDZ-GEF	Guanine nucleotide exchange factor OS=Drosophila melanogaster OX=7227 GN=PDZ-GEF PE=2 SV=1	1.26229	3.17331	0.267684	3.08087	1.24007	0.308719	0.46236	1.01191	1.19	0.126807	S1268
K.EIC(cam)EEDNS(phos)EVEEDDTT(phos)GDEDKVNA	Q7JX41	geminin	Geminin OS=Drosophila melanogaster OX=7227 GN=geminin PE=1 SV=1	-7.06116	-2.6049	-2.39137	-2.13924	-7.91254	-2.87641	-3.86014	-4.29764	1.19	0.443989	S177,T185
R.QKS(phos)PGLGSGLGGGSSSSSSR.M	Q9VWN4	Flacc	Fl(2)d-associated complex component OS=Drosophila melanogaster OX=7227 GN=Flacc PE=1 SV=1	-1.01409	0.0679723	-0.0801049	-0.703575	-0.370538	0.173251	-5.47423	-0.830972	1.19	0.355802	S231
R.SDTSGSSAGDLGDLTPC(cam)NAS(phos)PHLPGIIR.F	M9PC07	fry	Furry isoform H OS=Drosophila melanogaster OX=7227 GN=fry PE=1 SV=1	-5.31846	-3.71608	-3.55134	-3.92045	-3.20137	-3.41914	-4.9392	-9.7035	1.19	0.431588	S3079
K.KKQEES(phos)DEEFFDLDDIKAETS(phos)FR.L	Q9VCC0	CHORD	Cysteine and histidine-rich domain-containing protein OS=Drosophila melanogaster OX=7227 GN=CHORD PE=1 SV=1	-7.08807	-6.07954	-5.33963	-6.18259	-7.59564	-6.85383	-8.06027	-6.95253	1.19	0.0283729	S325,S340
K.DDS(phos)SGASMDDGSPQNLPQLR.K	Q9VA00	Zwilch	Protein zwilch OS=Drosophila melanogaster OX=7227 GN=Zwilch PE=1 SV=1	0.113732	0.237699	0.791096	0.111246	-0.477229	-3.13317	0.709184	-0.594854	1.19	0.161176	S436
R.SSES(phos)ASSIASR.D	Q6NLK4	BcDNA:SD06613	AT20787p OS=Drosophila melanogaster OX=7227 GN=BcDNA:SD06613 PE=2 SV=1	-4.4517	-4.54717	-5.75086	-4.43171	-4.24199	-4.62451	-5.14409	-9.93904	1.19	0.370754	S63
K.NM(ox)FAMS(phos)DDEEDEVADDLPNDS(phos)EEEEKEQLSNK.A	F6J9M9	CG1703	CG1703 (Fragment) OS=Drosophila melanogaster OX=7227 GN=CG1703 PE=4 SV=1	-7.04789	-1.47928	-1.6029	-1.36341	-1.35991	-2.1853	-10.2992	-2.38488	1.18	0.619921	S106,S121
K.KQAAAKPM(ox)VVEDEES(phos)T	Q24034	Mybbp1A	Lethal(1)1Bi protein OS=Drosophila melanogaster OX=7227 GN=Mybbp1A PE=4 SV=1	-6.1475	-6.01238	-7.57154	-3.08502	-7.08509	-6.52975	-7.29188	-6.63933	1.18	0.220104	S1133
K.SEAKDDPAPES(phos)PENR.K	Q9VID9	BEST:LD19244	Uncharacterized protein isoform B OS=Drosophila melanogaster OX=7227 GN=BEST:LD19244 PE=1 SV=3	-2.08489	-2.21277	-2.13838	-2.07328	-1.97504	-3.72803	-2.38437	-5.12327	1.18	0.117736	S1171
R.HNM(ox)S(phos)PTPPSQFANQTSGYEIPAR.L	M9PFG7	Klc	Kinesin light chain isoform C OS=Drosophila melanogaster OX=7227 GN=Klc PE=4 SV=1	-2.84828	-3.14511	-2.61054	-3.65943	-3.14718	-3.06973	-4.74554	-6.04016	1.18	0.128485	S167
R.SRS(phos)PVGNHRF	Q24491	Rsf1	RNA-binding protein Rsf1 OS=Drosophila melanogaster OX=7227 GN=Rsf1 PE=1 SV=1	-0.897946	-1.57123	-1.81561	-1.69703	-3.08218	-2.3203	-2.80726	-2.47554	1.18	0.00362105	S191
R.GYFS(phos)DPELNHSSR.K	Q9VWC0	Hers	Histone gene-specific epigenetic repressor in late S phase isoform A OS=Drosophila melanogaster OX=7227 GN=Hers PE=4 SV=2	0.819345	-0.402959	1.35489	-0.711917	-1.2031	-0.708818	-1.33876	-0.404671	1.18	0.0515695	S2097
K.SVEAVVS(phos)SEGAVIDRPEGYEPPVQEAV	P55830	RpS3A	40S ribosomal protein S3a OS=Drosophila melanogaster OX=7227 GN=RpS3A PE=1 SV=4	-7.82888	-7.6433	-7.84687	-7.73525	-8.84561	-9.09977	-8.99787	-8.8385	1.18	0.000103015	S249
R.VSDEPSATASSSAASSSS(phos)PSK.I	X2JAF1	lva	Lava lamp isoform D OS=Drosophila melanogaster OX=7227 GN=lva PE=4 SV=1	-3.62833	-3.99066	-3.47869	-4.22976	-4.88638	-5.25463	-4.43647	-5.47223	1.18	0.00456293	S2656
K.SEES(phos)PEKHDTADNLEDKNS(phos)DAEESTK.I	M9NEL3	kis	Kismet isoform F OS=Drosophila melanogaster OX=7227 GN=kis PE=1 SV=1	-2.32213	-1.37389	-1.37272	-1.79997	-3.05698	-2.86739	-2.38437	-3.28871	1.18	0.00537801	S3372,S3387
R.NSESENS(phos)PYHSQDAMTR.N	Q9W0L6	Dmel\CG13907	GH22266p OS=Drosophila melanogaster OX=7227 GN=Dmel\CG13907 PE=1 SV=1	-3.40398	-3.27968	-3.62785	-3.45892	-4.82129	-4.49386	-4.77425	-4.40557	1.18	0.00025653	S388
R.VTPNENAPEGENSKPQHPQQAANLNNSC(cam)S(phos)PK.K	Q6AWG9	CG5098	Uncharacterized protein CG5098 OS=Drosophila melanogaster OX=7227 GN=CG5098 PE=1 SV=1	2.19833	0.135635	-0.349583	-0.424626	-0.955986	-1.43712	0.692888	-1.47836	1.18	0.151173	S450
R.SLS(phos)EEINDR.F	Q8MRQ4	CG8135	LMBR1 domain-containing protein 2 homolog OS=Drosophila melanogaster OX=7227 GN=CG8135 PE=2 SV=2	-1.68659	-1.81005	-1.32533	-1.63755	-6.04089	-1.05795	-2.13709	-1.96333	1.18	0.281134	S653
R.YDS(phos)LSSLDESGK.A	P91667	Apc	Adenomatous polyposis coli OS=Drosophila melanogaster OX=7227 GN=Apc PE=2 SV=1	-4.19556	-2.64977	-2.6296	-2.13924	-2.41288	-9.86242	-1.98777	-2.08552	1.18	0.531401	S923
K.SNIYT(phos)PPR.I	Q9VL93	BcDNA:SD27505	GEO07195p1 OS=Drosophila melanogaster OX=7227 GN=BcDNA:SD27505 PE=1 SV=1	-3.08182	-3.33137	-3.25059	-10.113	-3.16054	-10.0206	-5.1677	-6.15535	1.18	0.580565	T75
R.KRRS(phos)S(phos)EDANEAFSK.E	Q9VID9	BEST:LD19244	Uncharacterized protein isoform B OS=Drosophila melanogaster OX=7227 GN=BEST:LD19244 PE=1 SV=3	-4.24202	-4.84395	-4.73766	-4.44278	-5.08602	-5.53399	-4.9392	-7.40718	1.17	0.0683148	S1043,S1044
K.SSS(phos)PAPVPVAVAR.R	Q9VJ12	Acn	Acinus isoform A OS=Drosophila melanogaster OX=7227 GN=Acn PE=1 SV=1	-1.08642	-1.50791	-1.26448	-1.37661	-2.04764	-2.73027	-2.6915	-2.44905	1.17	0.000825165	S13
K.KES(phos)NSEDELEYDPSLYPQR.V	Q960D3	vig2	SD06613p OS=Drosophila melanogaster OX=7227 GN=vig2 PE=1 SV=1	-6.06723	-6.54492	-2.56396	-6.52265	-6.56967	-6.45219	-6.69385	-6.67573	1.17	0.224532	S263
R.LADTPGHS(phos)HS(phos)PHEEAAGEDLVLR.Q	U3PU53	sqz-RA	FI22455p1 OS=Drosophila melanogaster OX=7227 GN=sqz-RA PE=2 SV=1	1.93242	0.274185	0.609972	0.514268	0.613365	-2.20221	2.11884	-1.87252	1.17	0.282005	S400,S402
R.KPGIGSPTNC(cam)DPGS(phos)PSIR.D	Q7KNQ9	cnk	Connector enhancer of KSR protein CNK OS=Drosophila melanogaster OX=7227 GN=cnk PE=1 SV=1	-2.922	-2.41479	-3.37856	-3.37882	-4.41369	-3.87032	-3.57168	-4.90953	1.17	0.0147041	S441
K.YEKS(phos)MQS(phos)VAK.L	Q9W0L6	Dmel\CG13907	GH22266p OS=Drosophila melanogaster OX=7227 GN=Dmel\CG13907 PE=1 SV=1	-5.37948	-4.63106	-4.82724	-5.11419	-6.16463	-6.15144	-5.9846	-6.34748	1.17	0.000802356	S523,S526
R.TIS(phos)ESTTHS(phos)GEHYTSR.F	A0A0B4KG56	PEK	Pancreatic eIF-2alpha kinase isoform C OS=Drosophila melanogaster OX=7227 GN=PEK PE=4 SV=1	-0.410691	-0.122835	-0.656585	-0.630596	-1.80282	-1.59191	-1.51683	-1.59333	1.17	0.000351994	S562,S568
R.FS(phos)DDIADQR.R	A0A0B4K7Y7	larp	La related protein isoform G OS=Drosophila melanogaster OX=7227 GN=larp PE=1 SV=1	-6.79977	-8.00431	-8.17843	-8.47776	-9.47958	-8.93393	-9.17796	-8.56381	1.17	0.0214554	S563
R.GS(phos)PLSQT(phos)PPSNVPSC(cam)LLR.G	Q9XZ56	Thor	4E-binding protein THOR OS=Drosophila melanogaster OX=7227 GN=Thor PE=1 SV=1	-4.1654	-3.29385	-3.79208	-3.20863	-3.38988	-4.49664	-6.07101	-5.2007	1.17	0.076924	S66,T71
R.NIS(phos)GNDAGANAGSASVQS(phos)PTHR.G	E1JGN0	par-1	Non-specific serine/threonine protein kinase OS=Drosophila melanogaster OX=7227 GN=par-1 PE=1 SV=1	-1.91217	-2.10263	-2.05872	-2.36618	-4.40412	-2.30805	-2.65767	-3.74166	1.17	0.0401274	S817,S832
R.KQAQNQES(phos)DEEDGLVEDDDEFEHFQDEEEFEGYDGGDSKDPPIDQK.V	Q8SZL8	CG17593	RH04607p OS=Drosophila melanogaster OX=7227 GN=CG17593 PE=2 SV=1	-3.06781	-3.38346	-3.55681	-3.04935	-3.95222	-4.68344	-4.67617	-4.40812	1.17	0.00152221	S82
K.SS(phos)EDLSGDQDSKPTLMLC(cam)AQHQR.T	Q9VVC7	Dmel\CG3764	FI05486p OS=Drosophila melanogaster OX=7227 GN=Dmel\CG3764 PE=2 SV=1	-1.4186	-6.78646	-0.789604	-1.11458	-5.7229	-1.04264	-7.29812	-0.721897	1.17	0.574616	S962
R.SASS(phos)TLDASISR.N	Q9W2R3	sktl	LP03320p OS=Drosophila melanogaster OX=7227 GN=sktl PE=1 SV=2	0.988177	-2.58734	-1.74117	-1.07818	-4.38518	0.128873	-2.29715	-2.50253	1.16	0.324752	S118
K.RGS(phos)LNAK.H	Q960A9	Sbf	SD10541p OS=Drosophila melanogaster OX=7227 GN=Sbf PE=2 SV=1	-4.89078	-4.42984	-4.39018	-5.4664	-9.99653	-4.61845	-4.01857	-5.17877	1.16	0.391054	S1316
R.N(d)(ac)SAADSS(phos)DHVDS(phos)EEEKIPEEK.F	X2JC55	Cds	Phosphatidate cytidylyltransferase OS=Drosophila melanogaster OX=7227 GN=Cds PE=1 SV=1	-5.06915	-4.41427	-4.80107	-4.5664	-9.34034	-4.99296	-4.43074	-4.71077	1.16	0.31563	S36,S41
K.QDS(phos)LLTEDES(phos)VEEKLPTTK.L	A0A0B4LFQ2	Incenp	Inner centromere protein isoform C OS=Drosophila melanogaster OX=7227 GN=Incenp PE=1 SV=1	-2.90945	-3.684	-3.52434	-3.61703	-4.11432	-5.28313	-4.4713	-4.50849	1.16	0.00655038	S403,S410
M.S(ac)HS(phos)VTITR.T	Q9VYX8	Dmel\CG1572	LD04844p OS=Drosophila melanogaster OX=7227 GN=Dmel\CG1572 PE=1 SV=1	-3.04018	-2.39938	-3.02437	-3.44217	-6.11177	-3.77617	-3.53284	-3.1225	1.16	0.118735	S5
R.IGDGLSST(phos)PRRS(phos)VLK.E	A1Z9I5	tum	FI24033p1 OS=Drosophila melanogaster OX=7227 GN=tum PE=1 SV=1	-7.38617	-7.21014	-7.95427	-9.02466	-8.62811	-10.9551	-8.14397	-8.48419	1.16	0.142498	T279,S283
K.QAT(phos)PIAVR.R	D0IQL0	Caf1-105-RA	MIP13707p OS=Drosophila melanogaster OX=7227 GN=Caf1-105-RA PE=2 SV=1	-6.76318	-4.37457	3.96171	3.87113	-3.73681	-4.17179	4.22736	-4.27652	1.16	0.722771	T625
R.AAAAAPLIIPLLSTS(phos)C(cam)SEEEVEEIDKEEQQR.R	C5I7D5	CG6227	Uncharacterized protein OS=Drosophila melanogaster OX=7227 GN=CG6227 PE=4 SV=1	-3.96247	-5.40844	-4.69287	-4.05547	-10.5255	-4.07934	-3.96794	-4.14102	1.15	0.469309	S173
K.S(phos)IEDEDASANR.A	Q500Y6		SD07352p OS=Drosophila melanogaster OX=7227 PE=2 SV=1	-0.773303	-1.31851	-1.15687	-1.34599	-1.91155	-1.86952	-1.80541	-3.61847	1.15	0.0329772	S174
K.N(d)(ac)LEENHSQLNPNAVAFVPGVGSQSSS(phos)PLPAAEDPLPGVQPR.P	P23226	Map205	205 kDa microtubule-associated protein OS=Drosophila melanogaster OX=7227 GN=Map205 PE=1 SV=2	-4.45534	-5.52397	-4.4533	-4.39543	-4.95456	-4.89074	-9.4647	-4.13256	1.15	0.343893	S254
R.QSS(phos)LDTAAAAANSNAENK.L	P18490	pcx	Protein pecanex OS=Drosophila melanogaster OX=7227 GN=pcx PE=2 SV=4	3.55596	3.31138	3.01258	3.09289	1.10005	2.05329	2.86061	2.36887	1.15	0.0186337	S299
R.SDS(phos)DHFTAASLLDDPLVANTEK.E	Q6NNE1	CG31037	RH02355p OS=Drosophila melanogaster OX=7227 GN=CG31037 PE=2 SV=1	-1.45918	-0.986684	-1.15341	-0.310444	-3.59767	-2.32647	-1.54748	-1.02275	1.15	0.0830733	S567
K.NQKS(phos)DLDDNEEESKAAESREPAQTEESNTK.T	Q86P47	Cnx99A	SD17909p (Fragment) OS=Drosophila melanogaster OX=7227 GN=Cnx99A PE=2 SV=1	-7.87891	-7.66967	-9.21831	-8.48995	-7.9344	-9.64533	-10.0601	-10.2158	1.15	0.0896361	S643
K.EQQQLGQSS(phos)PVRR.T	Q9VCX1	loco	Regulator of G-protein signaling loco OS=Drosophila melanogaster OX=7227 GN=loco PE=1 SV=2	-1.12581	-1.28627	-1.35675	-1.24974	-2.06011	-2.68997	-1.91603	-2.93621	1.15	0.00319647	S753
K.TSEVQDAPC(cam)T(phos)PER.L	B7Z0I8	CG14896	Uncharacterized protein OS=Drosophila melanogaster OX=7227 GN=CG14896 PE=1 SV=1	-5.33852	-5.38397	-5.50578	-6.0081	-6.71347	-6.39924	-6.19169	-7.54627	1.15	0.0100324	T115
R.QENDGS(phos)PSKPLQYC(cam)C(cam)LAVGSR.D	O17468	Hira	Protein HIRA homolog OS=Drosophila melanogaster OX=7227 GN=Hira PE=1 SV=2	0.800367	-1.43934	-1.15341	-0.918424	-2.84804	-1.50893	-1.63528	-1.26117	1.14	0.0876196	S288
R.LSVS(phos)LEGPGIYAMTS(phos)SPLPAK.R	Q9VUR5	RhoGAP71E	LD04071p OS=Drosophila melanogaster OX=7227 GN=RhoGAP71E PE=1 SV=2	3.11045	-0.4738	-1.43422	-0.368602	0.726538	-0.0381715	-2.67449	-1.75834	1.14	0.354038	S345,S356
R.HSS(phos)PTAVAVT(phos)PAKK.Q	Q9Y095	XRCC1	FI04011p OS=Drosophila melanogaster OX=7227 GN=XRCC1 PE=1 SV=1	-2.70039	-2.84464	-2.88044	-3.10979	-4.27067	-4.07726	-4.2816	-3.46328	1.14	0.00168991	S398,T405
R.ISLMES(phos)PRENK.V	B7Z0I8	CG14896	Uncharacterized protein OS=Drosophila melanogaster OX=7227 GN=CG14896 PE=1 SV=1	-5.94947	-6.55992	-6.14155	-6.48556	-8.5529	-6.52975	-6.87013	-7.72797	1.14	0.0395846	S467
K.S(phos)ET(phos)EDPIELLKKIDFQEALRLMNS(phos)TR.S	A0A0B4JDC3	TTC14	Uncharacterized protein isoform B OS=Drosophila melanogaster OX=7227 GN=TTC14 PE=4 SV=1	-5.20982	-6.55308	-7.55396	-6.25876	-9.64998	-5.73584	-9.8021	-4.94241	1.14	0.390473	S541,T543,S564
K.NNEVAGES(phos)PTDQQESEATLNDLDKTK.T	Q95R81	fmt	SD02803p OS=Drosophila melanogaster OX=7227 GN=fmt PE=2 SV=1	-5.66155	-4.30977	-5.23085	-4.77896	-7.3384	-6.95261	-5.04893	-5.19629	1.14	0.103979	S546
R.L(ac)LPGGDDS(phos)DDELQ(d)TAVPPSHDIYR.L	P25991	su(f)	Protein suppressor of forked OS=Drosophila melanogaster OX=7227 GN=su(f) PE=1 SV=2	-8.54967	-6.59178	-5.67762	-6.57687	-6.14325	-9.53978	-10.2639	-6.02443	1.14	0.355065	S739
K.EQS(phos)PDSFTHSR.T	Q86BY9	rig	Protein rigor mortis OS=Drosophila melanogaster OX=7227 GN=rig PE=1 SV=1	-6.60261	-6.79449	-6.25536	-6.46136	-9.6222	-6.72444	-7.12913	-7.19334	1.14	0.10886	S981
K.SATT(phos)SNSVTPATSAAPSPAPASEK.G	Q59E34	Mi-2	Mi-2 isoform B OS=Drosophila melanogaster OX=7227 GN=Mi-2 PE=1 SV=1	-7.668	-8.3014	-7.57154	-8.21241	-9.31472	-8.6504	-8.91241	-9.42052	1.14	0.00379393	T1552
K.TVELSTPEAAAASANS(phos)AKK.G	Q9W3D1	Caf1-180	Chromatin assembly factor 1 p180 subunit OS=Drosophila melanogaster OX=7227 GN=Caf1-180 PE=1 SV=1	0.550726	-0.276194	0.132803	0.0385191	-0.380273	-0.254783	-2.26496	-1.16911	1.13	0.0454647	S1036
K.FTHSAS(phos)LTYNN(d)GSTSR.R	P23226	Map205	205 kDa microtubule-associated protein OS=Drosophila melanogaster OX=7227 GN=Map205 PE=1 SV=2	-5.86949	-7.2231	-4.64554	-7.64388	-8.81826	-7.37098	-7.51599	-6.18128	1.13	0.201004	S1057
R.KLS(phos)RAS(phos)TSSVK.N	Q9VX35	CC4	LD36501p OS=Drosophila melanogaster OX=7227 GN=CC4 PE=1 SV=1	-3.95988	-3.6435	-3.96044	-3.79228	-4.57604	-4.98124	-5.17247	-5.13167	1.13	0.000642869	S161,S164
R.DEN(d)GS(phos)ASRYS(phos)DHER.N	M9PC85	x16	X16 splicing factor isoform B OS=Drosophila melanogaster OX=7227 GN=x16 PE=1 SV=1	-5.25993	-8.81935	-5.98607	-6.90584	-8.08521	-9.28717	-7.13098	-6.9887	1.13	0.228668	S187,S192
R.RAS(phos)VGAAGR.G	Q8SXT8	SNF4Agamma	RE22690p OS=Drosophila melanogaster OX=7227 GN=SNF4Agamma PE=2 SV=1	4.51286	4.72117	1.08947	1.07908	5.11886	0.0714091	4.65296	-2.96407	1.13	0.58679	S379
K.GSSSVHGGNPLGLGLPLSPS(phos)PR.Q	Q8MSQ7	Nak	SD07306p OS=Drosophila melanogaster OX=7227 GN=Nak PE=2 SV=1	-4.54569	-5.10375	-6.1636	-7.15235	-9.71107	-7.61239	-5.57167	-4.59008	1.13	0.363595	S400
L.NS(phos)STLDVR.T	Q8INM3	sle	Protein slender lobes OS=Drosophila melanogaster OX=7227 GN=sle PE=1 SV=1	-6.68579	-7.03232	-6.8103	-6.53839	-8.08114	-8.36399	-7.78143	-7.36894	1.13	0.00278184	S47
K.KGPASAS(phos)K.A	A0A0B4LFQ2	Incenp	Inner centromere protein isoform C OS=Drosophila melanogaster OX=7227 GN=Incenp PE=1 SV=1	0.20025	0.643069	0.280504	-0.082443	-1.08695	-0.722983	-1.02935	-0.626045	1.13	0.00118373	S517
R.QEAEAEDDS(phos)EEELGGLFR.V	Q9VVC9	Dmel\CG7728	LD38375p OS=Drosophila melanogaster OX=7227 GN=Dmel\CG7728 PE=2 SV=1	0.330307	-0.0235411	0.305806	0.376808	0.436124	0.555001	-2.19051	-2.33552	1.13	0.169416	S559
R.DVHENEDNLSDMVSANVS(phos)GR.G	Q9VZ08	CG1657	Receptor-mediated endocytosis protein 6 homolog OS=Drosophila melanogaster OX=7227 GN=CG1657 PE=1 SV=2	-8.66647	-6.61011	-4.24202	-8.76564	-10.0828	-5.19926	-11.0454	-6.46997	1.13	0.504209	S674
K.KPAIVSVDPWDGKDGQ(d)LPT(phos)EEDIDLS(phos).D	Q9V438	CaBP1	Protein disulfide-isomerase A6 homolog OS=Drosophila melanogaster OX=7227 GN=CaBP1 PE=1 SV=1	-5.73053	-9.59757	-10.5438	-10.9483	-10.3758	-10.6021	-10.3589	-10.0049	1.13	0.335841	T418,S425
R.KTN(d)GIEAEPGY(phos)GAYR.N	P91679	yin	Peptide transporter family 1 OS=Drosophila melanogaster OX=7227 GN=yin PE=1 SV=2	-4.85183	-7.97844	-9.35374	-9.95449	-9.4826	-9.19043	-9.05309	-8.94109	1.13	0.31469	Y729
R.S(phos)HETIEFEK.D	Q9VQ76	tho2	LD36155p OS=Drosophila melanogaster OX=7227 GN=tho2 PE=1 SV=2	-6.1241	-6.30212	-5.99593	-5.82324	-8.89243	-7.12933	-6.07994	-6.61557	1.12	0.092773	S1505
R.EIQRPLIPQPTQQTNS(phos)YPSYTK.I	Q4QQB9	Dmel\CG15098	LP21121p OS=Drosophila melanogaster OX=7227 GN=Dmel\CG15098 PE=1 SV=1	-7.05894	-6.68136	-6.27924	-7.03161	-7.48127	-10.413	-7.02885	-6.60383	1.12	0.209253	S180
R.HS(phos)PPPEDPR.L	A1ZBT6	anon-WO0118547.91	Uncharacterized protein isoform C OS=Drosophila melanogaster OX=7227 GN=anon-WO0118547.91 PE=1 SV=1	-2.36434	1.63781	-2.66849	-2.44742	-2.63727	-1.92927	-3.28677	-2.45563	1.12	0.292058	S333
K.S(phos)M(ox)ENM(ox)LDEK.V	Q7YU85	cindr	SD08724p OS=Drosophila melanogaster OX=7227 GN=cindr PE=2 SV=1	-8.56849	-8.03827	-10.6053	-8.922	-9.60239	-10.4063	-10.019	-10.5691	1.12	0.0839307	S482
R.SLTAEAEENKKIS(phos)PAK.Q	B7Z0D7	Dmel\CG7504	Uncharacterized protein isoform B OS=Drosophila melanogaster OX=7227 GN=Dmel\CG7504 PE=4 SV=1	0.492798	0.595804	0.241698	0.211688	-1.1422	-1.93397	-0.0113468	0.148745	1.12	0.049321	S639
R.LS(phos)PPSPGGVR.G	F6J774	CG18102	CG18102 (Fragment) OS=Drosophila melanogaster OX=7227 GN=CG18102 PE=4 SV=1	-0.201129	-0.393389	0.0196075	-0.295741	-0.652518	-0.733186	-0.792965	-3.13301	1.11	0.0907673	S115
R.S(phos)RS(phos)RS(phos)PMR.R	C1C547	SC35-RB	MIP01221p OS=Drosophila melanogaster OX=7227 GN=SC35-RB PE=2 SV=1	0.781137	-5.87819	0.342947	0.514268	-0.617556	-0.659337	-0.419015	-6.99329	1.11	0.606996	S130,S132,S134
R.QHYMQQ(d)TLTTS(phos)PSSTAGMTSGVSPYR.S	Q9U5W6	msps	Microtubule associated protein OS=Drosophila melanogaster OX=7227 GN=msps PE=4 SV=1	-3.21604	-2.8035	-2.76004	-2.8277	-3.76714	-3.99442	-4.36376	-3.923	1.11	0.000834502	S1553
R.NKS(phos)PPGSQTDNR.H	Q9VIV2	swm	Zinc finger protein swm OS=Drosophila melanogaster OX=7227 GN=swm PE=1 SV=1	-3.06781	-7.07672	-2.35127	-5.95433	-9.06668	-4.0961	-3.55135	-6.17259	1.11	0.493099	S281
R.S(phos)QM(ox)EELC(cam)APVLQR.V	Q9VUC1	Hsc70Cb	Hsc70Cb isoform A OS=Drosophila melanogaster OX=7227 GN=Hsc70Cb PE=1 SV=1	-4.95125	-4.42984	-6.58523	-6.83222	-6.37274	-5.74903	-9.64272	-5.47757	1.11	0.31801	S302
K.RLTS(phos)LAEDQNEPEAPDATANNTSAR.Q	A0A0B4LFQ2	Incenp	Inner centromere protein isoform C OS=Drosophila melanogaster OX=7227 GN=Incenp PE=1 SV=1	-1.3115	-1.35149	-1.63143	-1.43525	-2.99584	-2.44222	-2.30367	-2.41021	1.11	0.000965789	S75
K.VVLTTSDDQDQT(phos)LLDLPAEASPNVSK.S	Q9VC08	Mink	LD43724p OS=Drosophila melanogaster OX=7227 GN=Mink PE=1 SV=2	0.781137	-0.0884575	-0.0270162	0.336929	0.85656	0.414179	0.288897	-4.97984	1.11	0.413115	T432
H.TRPST(phos)PT(phos)VVTHTHDEDYSEEEETPSGAESSTEAVR.D	Q7K571	CG6247	GH10029p OS=Drosophila melanogaster OX=7227 GN=CG6247 PE=2 SV=1	-1.50566	-1.40049	-0.869486	-1.43986	-2.60039	-2.21932	-2.5607	-2.27029	1.11	0.00104752	T474,T476
M(ac)HAGVVKT(phos)PLS(phos)GR.K	Q9W3D1	Caf1-180	Chromatin assembly factor 1 p180 subunit OS=Drosophila melanogaster OX=7227 GN=Caf1-180 PE=1 SV=1	0.649471	0.333017	0.773067	0.561175	0.141802	0.376716	-1.91603	-0.739848	1.11	0.0592569	T9,S12
R.LQGHSGRGS(phos)SSEDYDSGEMISNK.L	H6WS59	Patronin	Patronin (Fragment) OS=Drosophila melanogaster OX=7227 GN=Patronin PE=2 SV=1	-4.87117	-5.15457	-4.51931	-4.96849	-9.67466	-4.46909	-4.72438	-5.05376	1.1	0.363995	S1089
K.DDPAPES(phos)PENR.K	Q9VID9	BEST:LD19244	Uncharacterized protein isoform B OS=Drosophila melanogaster OX=7227 GN=BEST:LD19244 PE=1 SV=3	-2.28924	-2.23995	-1.88835	-2.07328	-2.1046	-3.82772	-2.35696	-4.60755	1.1	0.0910122	S1171
M(ac)NQFHTPSFGDEVFELTDTPAESQS(phos)PSQASR.R	Q9W0D2	Dmel\CG12104	LP01188p OS=Drosophila melanogaster OX=7227 GN=Dmel\CG12104 PE=1 SV=1	2.22348	-5.50406	2.84362	3.42633	-5.41051	-5.70981	5.03873	4.69064	1.1	0.751885	S26
R.SDS(phos)TPEEPTTLAGIK.S	A1Z783	Dmel\CG8726	Uncharacterized protein isoform A OS=Drosophila melanogaster OX=7227 GN=Dmel\CG8726 PE=1 SV=1	0.107569	-0.29389	-0.603802	0.281982	-1.27392	-1.01748	-1.65183	-0.972363	1.1	0.00415135	S480
R.S(phos)RSPGGQSAASGGGK.V	Q9V4P1	scra	Anillin OS=Drosophila melanogaster OX=7227 GN=scra PE=1 SV=3	-4.07012	-5.85279	-4.20438	-5.26314	-4.96389	-6.51841	-6.39962	-5.89007	1.1	0.0729099	S55
M(ox)(ac)EVES(phos)PEHTR.D	Q8MS29	Snx1	RE32163p OS=Drosophila melanogaster OX=7227 GN=Snx1 PE=2 SV=1	-1.54395	-1.51204	-1.83207	-1.90444	-3.28229	-2.55353	-2.80726	-2.53699	1.1	0.00175407	S6
K.EEMLSC(cam)SFNS(phos)PN(d)GK.R	Q960Z0	Klp10A	Kinesin-like protein Klp10A OS=Drosophila melanogaster OX=7227 GN=Klp10A PE=1 SV=1	-5.72172	-8.80253	-5.03517	-6.19501	-7.53037	-9.04018	-6.91898	-6.67573	1.1	0.25868	S801
R.LVNS(phos)PNMFK.A	Q2XY08	Ctf4	CG13350 (Fragment) OS=Drosophila melanogaster OX=7227 GN=Ctf4 PE=4 SV=1	-6.95622	-6.72525	-6.92429	-6.73472	-9.83363	-7.61964	-7.2429	-7.05427	1.1	0.108263	S809
R.S(phos)RS(phos)AC(cam)DINELR.G	A0A0B4LI25	ncd	Kinesin-like protein OS=Drosophila melanogaster OX=7227 GN=ncd PE=1 SV=1	-8.51884	-7.88279	-8.31493	-8.48384	-10.4651	-9.07963	-9.11051	-8.94701	1.1	0.0212129	S95,S97
R.VAT(phos)PTATESQLPWK.R	Q8MQP4	Nhe2	Sodium/hydrogen exchanger (Fragment) OS=Drosophila melanogaster OX=7227 GN=Nhe2 PE=2 SV=1	-2.28924	-6.43403	-5.9473	-6.28507	-5.95458	-6.27002	-5.78151	-7.35117	1.1	0.289221	T906
R.RPS(phos)SEELVK.V	A0A0B4LFQ2	Incenp	Inner centromere protein isoform C OS=Drosophila melanogaster OX=7227 GN=Incenp PE=1 SV=1	0.504571	0.433222	0.547705	0.350345	-0.767897	-0.634262	-0.607971	-0.508549	1.09	0.0001486	S164
R.S(phos)RS(phos)MKPANNNGSVPSAAR.E	Q6AWQ1	SRm160	RE71183p OS=Drosophila melanogaster OX=7227 GN=SRm160 PE=2 SV=1	-2.68962	-2.47811	-4.47038	-3.92821	-3.22925	-4.67083	-5.97623	-4.03674	1.09	0.161844	S173,S175
R.TNS(phos)N(d)GSGMEFNNNNNSSNKK.F	M9PE05	enc	Encore isoform H OS=Drosophila melanogaster OX=7227 GN=enc PE=1 SV=1	-3.05393	-4.01159	-3.51367	-3.63173	-4.89529	-4.49386	-4.65934	-4.52223	1.09	0.00246503	S268
K.PSAPIGASVS(phos)PLAK.K	Q7K0D8	Nup50	Nuclear pore complex protein Nup50 OS=Drosophila melanogaster OX=7227 GN=Nup50 PE=2 SV=1	-8.11214	-7.66967	-7.54235	-8.50224	-6.51649	-10.2918	-9.65771	-9.70892	1.09	0.22136	S291
R.KFVEWLQSAEEESES(phos)EDEQKN(d)GE	Q9VNE2	kra	Protein krasavietz OS=Drosophila melanogaster OX=7227 GN=kra PE=1 SV=1	-8.08478	-9.69761	-8.29045	-8.5589	-9.28633	-10.4072	-9.32312	-9.9575	1.09	0.0386332	S415
K.ELDT(phos)IKEGSDEADS(phos)TGEAEQAQSDEKPSKK.V	Q9I7K6	CG8223	Protein NASP homolog OS=Drosophila melanogaster OX=7227 GN=CG8223 PE=1 SV=1	-5.02516	-4.69733	-4.61483	-4.57449	-6.12219	-5.44007	-6.16293	-5.56022	1.09	0.00225368	T175,S185
K.ET(phos)PVPVT(phos)PEPVSPLPLPTEPPLIIK.G	Q9VDD2	SNF4Agamma	LD22662p OS=Drosophila melanogaster OX=7227 GN=SNF4Agamma PE=1 SV=2	1.16178	-0.865306	-0.0413023	-0.353297	0.889341	-0.596516	-0.927579	-3.83805	1.09	0.303988	T334,T339
R.ST(phos)DNLEKYS(phos)PLVGR.K	Q8IGL5	LRR	Leucine-rich repeat isoform A OS=Drosophila melanogaster OX=7227 GN=LRR PE=1 SV=1	-2.61639	-2.69607	-3.55134	-2.63561	-4.26489	-3.65638	-3.44366	-4.50303	1.09	0.0131969	T338,S345
R.SMAEDGS(phos)PS(phos)PEKEKPEKLPFIK.Y	E1JIP3	WRNexo	WRN exonuclease isoform B OS=Drosophila melanogaster OX=7227 GN=WRNexo PE=4 SV=1	4.08319	1.81336	1.91532	2.70359	1.52199	1.69837	1.56415	1.42384	1.08	0.0659422	S111,S113
R.QQ(d)S(phos)MLER.G	A0A0B4K6Y7	pyd	Polychaetoid isoform O OS=Drosophila melanogaster OX=7227 GN=pyd PE=1 SV=1	-3.55025	-7.67752	-3.8898	-5.16826	-3.36493	-7.07019	-6.35557	-7.8119	1.08	0.410065	S1736
K.TSVADLQASS(phos)PVLLR.R	M9PFQ9	CG42348	Uncharacterized protein isoform E OS=Drosophila melanogaster OX=7227 GN=CG42348 PE=1 SV=1	-0.265656	-2.12147	-0.819386	-1.01146	-1.3793	-1.09958	-4.96379	-1.10825	1.08	0.284446	S230
K.DGPDQESMPLPADN(d)GES(phos)PSKQQAPVNRDEM(ox)HYLDLLR.H	Q541C9	Ts	RE18955p OS=Drosophila melanogaster OX=7227 GN=Ts PE=1 SV=1	-6.36333	-5.77916	-7.1589	-7.34371	-5.48922	-9.14165	-8.12536	-8.21775	1.08	0.215517	S25
K.SDTAS(phos)PHS(phos)PLPASSQVS(phos)PSSRPSR.T	Q8T9D1	Chro	SD06626p OS=Drosophila melanogaster OX=7227 GN=Chro PE=2 SV=1	-5.38642	-5.22344	-5.53423	-5.3438	-6.54283	-6.1959	-6.45665	-6.6274	1.08	0.000345589	S305,S308,S317
K.ASAFQFS(phos)DDEEEVKRVVR.S	A0A0B4LFL2	eIF3c	Eukaryotic translation initiation factor 3 subunit C OS=Drosophila melanogaster OX=7227 GN=eIF3c PE=3 SV=1	-10.3349	-9.56644	-10.6796	-5.56773	-10.3153	-10.7748	-9.02521	-10.3467	1.08	0.371844	S35
R.PAVLANSS(phos)GSNNSSTSPSAGEDSALLNNPFLR.E	Q9VCI7	RanBP3	LD02979p OS=Drosophila melanogaster OX=7227 GN=RanBP3 PE=1 SV=1	-5.35885	-5.65688	-5.43701	-6.53207	-6.6823	-4.96191	-9.64792	-6.03227	1.08	0.291326	S40
R.ERS(phos)ES(phos)PFSPAFS(phos)PVK.S	A0A0B4KHR6	NSD	Nuclear receptor binding SET domain protein isoform B OS=Drosophila melanogaster OX=7227 GN=NSD PE=4 SV=1	-0.435223	-1.98873	-1.64107	-1.67512	-0.742564	-2.25416	-2.98462	-4.09101	1.08	0.175907	S576,S578,S585
K.RSS(phos)LT(phos)PTPTPMR.Q	Q9VU76	cmb	Combover isoform A OS=Drosophila melanogaster OX=7227 GN=cmb PE=1 SV=2	-1.50095	-0.813338	-1.00603	-1.02179	-3.26488	-0.464863	-3.29975	-1.61525	1.08	0.14234	S645,T647
R.N(d)GSN(d)GTEVDGSLQSS(phos)KR.F	Q9VUC6	Frl	Formin-like protein OS=Drosophila melanogaster OX=7227 GN=Frl PE=1 SV=3	-9.56313	-7.4997	-9.24628	-9.39572	-9.82271	-10.3889	-9.81711	-9.9889	1.08	0.0552837	S761
R.ST(phos)PDTFELMHYNGIPGSNENNK.V	X2JL49	Dmel\CG7332	Uncharacterized protein isoform B OS=Drosophila melanogaster OX=7227 GN=Dmel\CG7332 PE=4 SV=1	-5.33852	-3.4141	-4.28067	-3.48156	-3.2434	-3.63021	-4.14176	-9.81829	1.08	0.485506	T493
R.GKS(phos)PATPSYR.K	Q8WR08	Dg	Dystroglycan type I OS=Drosophila melanogaster OX=7227 GN=Dg PE=1 SV=1	-4.3031	-1.39284	-4.82724	-5.04511	-4.74686	-5.12001	-5.92705	-4.04069	1.07	0.25303	S1165
Y.AINEDMGQEGS(phos)PPLK.M	Q9VP57	pzg	LD15904p OS=Drosophila melanogaster OX=7227 GN=pzg PE=1 SV=1	-7.58901	-5.96625	-5.66184	-9.21388	-9.18675	-9.169	-6.60349	-7.76148	1.07	0.292285	S175
R.E(ac)N(d)LS(phos)PKEEILATTGPEKPTK.A	F0JAN2	CG4452-RA	RH36108p OS=Drosophila melanogaster OX=7227 GN=CG4452-RA PE=2 SV=1	-5.39339	-4.04716	-3.80719	-4.08405	-4.031	-4.21232	-3.81843	-9.55564	1.07	0.438492	S183
R.KDLQS(phos)LENFLR.R	Q8MSM9	Dmel\CG11698	AT18730p OS=Drosophila melanogaster OX=7227 GN=Dmel\CG11698 PE=2 SV=1	-1.73007	-1.29338	-1.32922	-2.57349	-3.22925	-2.74672	-2.17249	-3.05104	1.07	0.0222209	S246
R.NS(phos)AADS(phos)SDHVDS(phos)EEEKIPEEK.F	X2JC55	Cds	Phosphatidate cytidylyltransferase OS=Drosophila melanogaster OX=7227 GN=Cds PE=1 SV=1	-5.45773	-0.496159	-0.921389	-0.362023	-4.78773	-1.89679	-2.08558	-2.75492	1.07	0.425248	S31,S35,S41
K.IYVDQEEGS(phos)PVTGGSIT(phos)PK.T	Q9VIT3	msb1l	LD32040p OS=Drosophila melanogaster OX=7227 GN=msb1l PE=1 SV=2	-3.14516	-1.88854	-2.13838	-3.02144	-3.09495	-3.13317	-4.54979	-3.70829	1.07	0.0443074	S311,T319
R.RDLS(phos)PMPEHYAPR.L	Q9VWN4	Flacc	Fl(2)d-associated complex component OS=Drosophila melanogaster OX=7227 GN=Flacc PE=1 SV=1	-2.34731	-0.875928	-0.686212	-1.6589	-0.411873	-1.27331	-6.52821	-1.63005	1.07	0.439482	S423
K.PIEDS(phos)GAHEVK.D	A8JQY2	anon-87Ab	Uncharacterized protein isoform C OS=Drosophila melanogaster OX=7227 GN=anon-87Ab PE=1 SV=1	-3.94187	-4.22313	-3.28795	-3.74815	-4.93606	-4.85822	-5.01856	-4.65218	1.07	0.00252399	S454
K.SLADSKDEATASAIELLGGS(phos)PSHK.T	Q8IPK8	Bsg25D	Blastoderm-specific gene 25D isoform C OS=Drosophila melanogaster OX=7227 GN=Bsg25D PE=4 SV=1	1.58416	0.249964	-0.0899708	0.833722	-0.417876	-1.32176	1.87343	-1.83774	1.07	0.235485	S762
K.GTASST(phos)PTISSDDLSDLADS(phos)PVDEK.A	D0IQK3	AMPdeam	AMP deaminase OS=Drosophila melanogaster OX=7227 GN=AMPdeam PE=1 SV=2	3.3802	-3.18418	-0.481885	1.55518	-1.0711	3.54835	-3.85822	-1.61894	1.07	0.593016	T37,S51
K.WVAEGSPT(phos)HST(phos)PVRIEDPLQFVPAGTNPR.E	A0A0B4K849	hts	Hu li tai shao isoform O OS=Drosophila melanogaster OX=7227 GN=hts PE=1 SV=1	-6.3497	-9.34099	-9.16394	-6.69185	-9.9681	-10.1676	-7.01337	-8.65776	1.07	0.314819	T481,T484
D.ES(phos)DDDEEAPVEKPVSK.K	P13469	mod	DNA-binding protein modulo OS=Drosophila melanogaster OX=7227 GN=mod PE=1 SV=2	-6.96036	-7.37634	-7.82914	-7.65071	-8.83187	-8.38443	-8.44725	-8.37643	1.06	0.00296106	S130
R.KS(phos)ADIVDTPSPEASEGPC(cam)VSK.L	Q9XYF4	Dronc	Caspase Dronc OS=Drosophila melanogaster OX=7227 GN=Dronc PE=1 SV=1	1.6007	2.22723	-0.688708	1.7141	-2.59132	1.54217	1.37793	0.293048	1.06	0.349607	S131
M.PLSTYDAAPLLHSYDDS(phos)PQR.W	A1Z968	NAT1	NAT1 isoform D OS=Drosophila melanogaster OX=7227 GN=NAT1 PE=1 SV=1	-7.41427	-7.92099	-8.11259	-8.20235	-8.81826	-8.80161	-8.18579	-10.0931	1.06	0.0383331	S19
K.SDATDSPS(phos)PPK.K	Q9W1H4	DNAlig1	DNA ligase 1 OS=Drosophila melanogaster OX=7227 GN=DNAlig1 PE=1 SV=2	-7.96357	-7.45825	-6.97215	-7.86417	-7.27659	-10.4347	-6.80499	-9.98172	1.06	0.26342	S21
R.KSGSQQKS(phos)PISK.A	Q8SX89	kuk	Kugelkern isoform A OS=Drosophila melanogaster OX=7227 GN=kuk PE=1 SV=1	-3.08182	-9.46653	-3.08885	-5.18674	-6.86443	-4.35629	-4.48904	-9.37308	1.06	0.559966	S254
R.LNS(phos)NPVAAGVSK.N	Q961C3	Dmel\CG8478	LD23630p OS=Drosophila melanogaster OX=7227 GN=Dmel\CG8478 PE=1 SV=1	-3.42348	-4.07137	-4.63395	-4.74205	-5.3178	-4.735	-5.49201	-5.56022	1.06	0.0187556	S410
R.APS(phos)RDTLGIK.N	Q9V411	Non1	Nucleolar GTP-binding protein 1 OS=Drosophila melanogaster OX=7227 GN=Non1 PE=2 SV=1	-6.07842	-6.36059	-6.32823	-6.33917	-9.92863	-6.52975	-6.49199	-6.37714	1.06	0.227525	S592
R.EQS(phos)VEEDVAR.V	Q8MSQ4	Mekk1	Mekk1 isoform B OS=Drosophila melanogaster OX=7227 GN=Mekk1 PE=2 SV=1	-1.45007	-1.23068	-1.47674	-1.24167	-2.65607	-2.86739	-2.60837	-1.51912	1.06	0.0109532	S73
R.DEAGDNS(phos)DS(phos)EDEHVPK.K	Q6AWQ1	SRm160	RE71183p OS=Drosophila melanogaster OX=7227 GN=SRm160 PE=2 SV=1	0.0444514	1.23073	0.983698	0.595381	-0.710282	-1.55163	0.452714	0.433149	1.06	0.0791244	S831,S833
R.EIMQT(phos)SDESTQELASSQSAERPVYR.R	Q8SWW4	anon-WO0140519.52	LD28380p OS=Drosophila melanogaster OX=7227 GN=anon-WO0140519.52 PE=1 SV=1	-2.80114	0.652339	-3.33567	-2.72283	-4.49258	-4.77155	-4.5529	1.37371	1.06	0.527607	T522
R.RC(cam)SST(phos)PVIDSIPNSPASSEHTDDR.R	Q2XY62	Brd8	CG14514 (Fragment) OS=Drosophila melanogaster OX=7227 GN=Brd8 PE=4 SV=1	1.01312	0.274185	-2.74957	-3.26643	-2.89192	-2.16306	-3.66102	-0.233835	1.06	0.402244	T702
R.SNS(phos)SGGVTMQNNAAASLNK.L	M9PCT8	Abl	Abl tyrosine kinase isoform C OS=Drosophila melanogaster OX=7227 GN=Abl PE=1 SV=1	-0.650721	-1.10041	-1.18127	-1.1109	-2.4049	-1.64487	-2.2149	-1.97273	1.05	0.00241972	S1078
R.KLS(phos)DVDM(ox)TEVQLNNLDDSSAK.E	A8E6R0	CG16771	IP17434p OS=Drosophila melanogaster OX=7227 GN=CG16771 PE=2 SV=1	-2.67893	-4.52026	-2.42428	-1.74188	-3.58861	-3.32972	-4.85246	-3.80744	1.05	0.138753	S19
R.LAPPS(phos)PQQWK.M	Q8INX3	CG10336	Protein TIPIN homolog OS=Drosophila melanogaster OX=7227 GN=CG10336 PE=2 SV=2	0.432448	1.49569	1.04509	1.18021	1.43585	-2.0163	-0.506633	1.04141	1.05	0.206511	S196
R.RS(phos)PS(phos)PEAPSTK.Q	Q500Y6		SD07352p OS=Drosophila melanogaster OX=7227 PE=2 SV=1	-1.28289	-4.0352	-1.7257	-1.19415	-2.69441	-1.93397	-3.39408	-4.42093	1.05	0.221459	S390,S392
R.QS(phos)KSPEAPELQPVEVDDGFR.Y	Q7K7W5	adp	Adipose protein OS=Drosophila melanogaster OX=7227 GN=adp PE=2 SV=1	-0.745148	0.506615	-0.159257	-0.117104	4.15303	-5.30244	-0.719148	-2.83842	1.05	0.586778	S467
R.GYDN(d)GSGVPGDSPERLS(phos)PER.M	Q7KMJ6	nito	RNA-binding protein spenito OS=Drosophila melanogaster OX=7227 GN=nito PE=1 SV=1	-6.25773	-9.06262	-6.59419	-7.56118	-8.65811	-10.4756	-7.18972	-7.34921	1.05	0.283641	S63
R.S(phos)ISKEPKPNDSNYR.S	Q9XZ21	snama	Something that sticks like glue isoform A OS=Drosophila melanogaster OX=7227 GN=snama PE=1 SV=1	-4.91066	-4.58501	-5.30245	-4.82648	-6.37274	-5.80303	-5.8259	-5.81373	1.05	0.00243996	S733
M(ac)NNLDSS(phos)LQAHNKLEK.E	H1UUN4	exo70-RA	Exocyst complex component 7 OS=Drosophila melanogaster OX=7227 GN=exo70-RA PE=2 SV=1	-4.58109	-3.29385	-4.06813	-4.04982	-6.14325	-4.76483	-4.21613	-5.05776	1.05	0.0558926	S8
K.TVAVEPVAADTT(phos)PDNAPAVSTEGSGK.A	Q9I7K6	CG8223	Protein NASP homolog OS=Drosophila melanogaster OX=7227 GN=CG8223 PE=1 SV=1	-5.90893	-5.57845	-5.39727	-5.57582	-7.13696	-6.36838	-7.09251	-6.06408	1.05	0.00866474	T34
R.HSSSAASDAALTNGVTVNGNGVGHQDS(phos)DGEHEDEELGEEAR.N	Q9VIG1	l(2)05287	FI12406p OS=Drosophila melanogaster OX=7227 GN=l(2)05287 PE=1 SV=2	-3.74838	-0.0205917	-3.59002	-3.50263	-3.97564	-1.0125	-5.53435	-4.50303	1.04	0.4168	S1012
R.S(phos)LPDSNENR.S	Q95RC5	Dmel\CG5745	LD44506p OS=Drosophila melanogaster OX=7227 GN=Dmel\CG5745 PE=2 SV=1	-4.02068	1.14795	-3.56412	-3.84268	-4.27939	-2.95066	-4.13011	-3.08123	1.04	0.40585	S187
K.WTRPKEEYVDDDGDTDS(phos)IPSR.M	M9PB69	Piezo	Piezo-type mechanosensitive ion channel component OS=Drosophila melanogaster OX=7227 GN=Piezo PE=1 SV=1	-2.44356	-2.59609	-5.97628	-3.18057	-1.79759	-6.00976	-8.71058	-1.84204	1.04	0.562205	S2533
K.SSEQYNPGS(phos)PTSES(phos)NDAQPSEK.K	Q7KRW8	CG1646	Pre-mRNA-processing factor 39 OS=Drosophila melanogaster OX=7227 GN=CG1646 PE=1 SV=1	-4.40866	-3.7646	-4.2627	-4.51489	-5.42334	-6.00976	-4.9311	-4.76202	1.04	0.0143372	S309,S314
K.FLMEPDESLC(cam)LEQGDEEEEEDAEDEDLDEDEEDPPS(phos)EEDKKR.K	A1ZAK4	Dek	Dek isoform A OS=Drosophila melanogaster OX=7227 GN=Dek PE=1 SV=1	-5.39339	-5.71673	-5.64622	-5.56773	-5.52333	-5.852	-8.99403	-6.09661	1.04	0.204556	S351
R.TGTQAIAHAGDHS(phos)DLDEPKPK.I	Q8IH00	Mat89Ba	Nucleolar protein 6 OS=Drosophila melanogaster OX=7227 GN=Mat89Ba PE=1 SV=1	-0.596896	-0.770591	-0.731824	-0.692528	-0.785899	-2.52489	-2.74378	-0.905553	1.04	0.0704489	S36
K.M(ox)MGAADQNSTLSTEYNAQS(phos)PPHMK.R	P04197	Myb	Myb protein OS=Drosophila melanogaster OX=7227 GN=Myb PE=1 SV=2	-0.617165	1.62845	-3.04982	-2.87687	-1.35991	-3.39302	-2.81656	-1.50882	1.04	0.377015	S516
R.LNS(phos)NSGGTPATTPGSVT(phos)PRPR.G	Q9NBD7	chb	CLIP-associating protein OS=Drosophila melanogaster OX=7227 GN=chb PE=1 SV=1	-6.17127	-5.11881	-4.93693	-5.50454	-6.41055	-6.8048	-6.2713	-6.41766	1.04	0.0100419	S635,T649
K.SNNNASADAPDPTT(phos)PDATGEADAANAATPTTPR.G	Q9XZL8	sra	Protein sarah OS=Drosophila melanogaster OX=7227 GN=sra PE=1 SV=1	-3.18243	-3.21083	-4.66115	-2.87687	-2.96037	-2.76335	-3.11627	-9.26063	1.04	0.504947	T21
M.PRSDT(phos)EALVADVETGEDS(phos)APR.I	Q961H2	CG8054	GH23453p OS=Drosophila melanogaster OX=7227 GN=CG8054 PE=1 SV=1	-7.81009	-6.89635	-7.67863	-8.14822	-7.12225	-7.53266	-10.4739	-9.57697	1.04	0.222063	T7,S20
K.DLLNSTQT(phos)PPC(cam)S(phos)PIK.S	Q7JVP4	Br140	Bromodomain-containing protein 140kD isoform A OS=Drosophila melanogaster OX=7227 GN=Br140 PE=1 SV=1	-1.05843	0.135635	0.414478	-0.181288	-3.16054	0.998995	-2.08558	-0.60031	1.04	0.275698	T872,S876
R.S(ac)SGN(d)GPRFGNS(phos)PR.T	M9PG50	Cdk12	Cyclin-dependent kinase 12 isoform C OS=Drosophila melanogaster OX=7227 GN=Cdk12 PE=4 SV=1	0.162106	-0.795583	-1.60762	-0.0878608	-1.7066	-1.63335	-2.70872	-0.396739	1.03	0.116541	S281
R.FS(phos)DLDKSS(phos)PVSSR.T	A0A0B4LFQ2	Incenp	Inner centromere protein isoform C OS=Drosophila melanogaster OX=7227 GN=Incenp PE=1 SV=1	-1.3407	-1.64199	-1.32145	-1.51572	-2.50359	-2.32647	-2.53745	-2.57229	1.03	0.000326806	S306,S312
R.RPNS(phos)PSNNINHNNIK.K	Q0KHR5	RhoGAP15B	Rho GTPase activating protein at 15B isoform B OS=Drosophila melanogaster OX=7227 GN=RhoGAP15B PE=1 SV=1	-3.23628	-2.39174	-2.68834	-3.57992	-4.83407	-2.94117	-5.05332	-3.17581	1.03	0.113278	S33
R.SQQLQHQQS(phos)EN(d)GSSANTSGQDQDTFEPR.P	Q7JRH5	Dmel\CG5726	RE28271p OS=Drosophila melanogaster OX=7227 GN=Dmel\CG5726 PE=1 SV=1	-2.27307	-4.86073	-4.2479	-4.79778	-6.07084	-5.85914	-4.46837	-3.88877	1.03	0.208783	S343
R.GLDYYTGVIYEGVLKGESATVAS(phos)PAK.T	Q9VWT1	HisRS	GH22474p OS=Drosophila melanogaster OX=7227 GN=HisRS PE=1 SV=1	-8.17806	-8.25186	-8.91917	-9.47225	-9.17803	-10.4479	-9.42871	-9.9024	1.03	0.035202	S353
R.KAS(phos)KTAS(phos)S(phos)EDDVVAATPEPIAK.K	P35600	Gnf1	Replication factor C subunit 1 OS=Drosophila melanogaster OX=7227 GN=Gnf1 PE=1 SV=2	-5.87925	-6.03125	-6.67743	-6.18259	-7.18638	-7.04232	-6.55287	-8.11422	1.03	0.023894	S59,S63,S64
R.QSS(phos)NGGSGSGSAPVPPQR.H	E1JGR7	Vrp1	Verprolin 1 isoform I OS=Drosophila melanogaster OX=7227 GN=Vrp1 PE=1 SV=1	-3.84308	-3.23797	-6.71439	-4.17646	-4.24768	-3.52862	-5.26622	-9.04944	1.03	0.460281	S608
R.LNS(phos)NSGGTPATTPGSVTPR.P	Q9NBD7	chb	CLIP-associating protein OS=Drosophila melanogaster OX=7227 GN=chb PE=1 SV=1	-5.4004	-4.6749	-4.01203	-4.43908	-4.70711	-6.06642	-6.26111	-5.60047	1.03	0.0481044	S635
R.QNS(phos)GSGGSANQTN(d)GN(d)GAAGAGGAHGASVMPLGINR.I	Q9VY91	Pdcd4	LD21074p OS=Drosophila melanogaster OX=7227 GN=Pdcd4 PE=1 SV=2	-2.11339	-6.60586	-2.67838	-3.26152	-3.41849	-9.58908	-2.93313	-2.82985	1.03	0.574976	S81
R.KLS(phos)YDDES(phos)PSEGTGC(cam)STGQLR.R	Q9W3D1	Caf1-180	Chromatin assembly factor 1 p180 subunit OS=Drosophila melanogaster OX=7227 GN=Caf1-180 PE=1 SV=1	3.34789	2.46937	3.37428	2.95918	2.55799	3.13683	0.383321	1.94144	1.03	0.120926	S87,S92
M(ac)VTPQSPT(phos)PMFN(d)GLDDDLYSDAK.Y	Q961C9	Tango11	Transport and Golgi organization protein 11 OS=Drosophila melanogaster OX=7227 GN=Tango11 PE=1 SV=1	-2.66832	-6.18126	-4.04236	-3.90507	-4.87753	-5.76904	-4.16533	-6.09661	1.03	0.229989	T9
K.RGMEDDS(phos)S(phos)DEDKLQQK.L	C5WLN0	CG2691-RA	RE72321p (Fragment) OS=Drosophila melanogaster OX=7227 GN=CG2691-RA PE=2 SV=1	-4.12131	-2.90864	-2.83549	-3.08647	-5.3238	-4.20776	-3.23596	-4.28353	1.02	0.0746008	S1284,S1285
K.SGS(phos)PGTGGPGGAGNPAGPGR.T	Q9VZ20	Dlic	Dynein light intermediate chain isoform A OS=Drosophila melanogaster OX=7227 GN=Dlic PE=1 SV=2	-3.61604	-4.04236	-4.193	-4.1642	-4.94991	-5.13292	-5.14409	-4.85983	1.02	0.00106013	S435
R.DKGS(phos)VSPPHTS(phos)AAPPAAPIAPPK.E	Q9VWC0	Hers	Histone gene-specific epigenetic repressor in late S phase isoform A OS=Drosophila melanogaster OX=7227 GN=Hers PE=4 SV=2	-0.176481	0.200266	0.482629	0.606605	-1.395	-0.156765	-1.10997	-0.316726	1.02	0.0198489	S699,S706
K.SEALHIVAGHPIKGEEGDEVLDFEEIS(phos)DGELEEDAR.H	Q9VWN4	Flacc	Fl(2)d-associated complex component OS=Drosophila melanogaster OX=7227 GN=Flacc PE=1 SV=1	-0.506688	-0.492068	0.886422	0.795	1.07889	0.743397	-4.86013	-0.377876	1.02	0.455875	S947
R.SNS(phos)TQANQAQLLHNGGGGSGGNVGNSGGVGDR.L	Q8IRT8	Tlk	Tousled-like kinase isoform B OS=Drosophila melanogaster OX=7227 GN=Tlk PE=1 SV=3	-2.89701	-1.34041	-3.21993	-2.18496	-3.2434	-2.50377	-4.53744	-3.42406	1.02	0.108071	S996
K.VAEASELSIYYKTT(phos)PLT(phos)PK.Q	A1Z6I7	BubR1	Bub1-related kinase OS=Drosophila melanogaster OX=7227 GN=BubR1 PE=1 SV=1	-7.03039	-7.41547	-6.27924	-5.88226	-6.50281	-6.87103	-6.74978	-10.5745	1.02	0.314046	T1082,T1085
K.SAT(phos)PASPAVPNIK.I	Q9VQ83	FBgn	RE23541p OS=Drosophila melanogaster OX=7227 GN=FBgn 31395 PE=1 SV=1	-0.435223	-0.821015	0.188278	0.862097	-0.0861558	-0.647709	-2.55291	-1.01059	1.02	0.130908	T32
R.KKT(phos)IS(phos)ETEQQTTQQQQK.Q	A1Z8M2	tou	Toutatis isoform A OS=Drosophila melanogaster OX=7227 GN=tou PE=1 SV=2	-3.08182	-2.71502	-3.1021	-2.94079	-3.8044	-5.22207	-3.11627	-3.78077	1.02	0.0492422	T538,S540
R.S(phos)MHS(phos)LHSLR.S	Q59DP9	PMCA	Calcium-transporting ATPase OS=Drosophila melanogaster OX=7227 GN=PMCA PE=1 SV=3	-2.59613	-2.05357	-2.35127	-2.0449	-2.69441	-3.52862	-3.67279	-3.18671	1.01	0.00668462	S1130,S1133
R.RDDDRLS(phos)GR.N	Q9VHC7	rump	FI21236p1 OS=Drosophila melanogaster OX=7227 GN=rump PE=1 SV=1	-7.49	-3.8354	-6.61076	-6.76959	-6.70718	-6.86959	-7.63469	-7.53955	1.01	0.23013	S194
K.QHQLEHEQFGLSNSLS(phos)SES(phos)IR.Q	Q8MSR0	bdg	SD06851p OS=Drosophila melanogaster OX=7227 GN=bdg PE=2 SV=1	-1.01073	-2.70552	-1.75157	-0.96419	-2.84804	-3.40602	-2.3913	-1.82917	1.01	0.0808187	S67,S70
R.S(phos)HEHLDSS(phos)PQEEIPNKK.A	Q7KMH9	wde	BcDNA.LD26050 OS=Drosophila melanogaster OX=7227 GN=wde PE=1 SV=1	5.01278	2.34053	2.97955	4.20233	2.80348	2.62628	2.86607	2.2143	1.01	0.123545	S750,S757
R.SNS(phos)IDSLR.T	M9PDR8	CdGAPr	Cd GTPase activating protein-related isoform D OS=Drosophila melanogaster OX=7227 GN=CdGAPr PE=1 SV=1	-0.451053	-0.919215	-0.573497	-0.171668	-4.85564	-0.404913	0.00194268	-0.914587	1.01	0.358807	S838
R.SAT(phos)PEPLVVK.R	Q9VZ60	Dmel\CG2186	Uncharacterized protein isoform A OS=Drosophila melanogaster OX=7227 GN=Dmel\CG2186 PE=1 SV=1	-2.77813	-3.68027	-3.36412	-3.23885	-4.52331	-4.16073	-4.15822	-4.25801	1.01	0.00307507	T1001
K.NTDDDS(phos)GPPIK.I	P15348	Top2	DNA topoisomerase 2 OS=Drosophila melanogaster OX=7227 GN=Top2 PE=1 SV=1	-8.49464	-8.11672	-8.26639	-8.21241	-9.10184	-9.46729	-9.35747	-9.17114	1	0.000594083	S264
R.YDQDPNSRKS(phos)GADGQEQLS(phos)PTSQQK.K	A0A0B4LG23	cora	Coracle isoform G OS=Drosophila melanogaster OX=7227 GN=cora PE=1 SV=1	-5.07475	-3.4855	-3.5297	-3.43295	-9.91717	-3.43238	-2.97418	-3.19769	1	0.545096	S589,S598
K.QT(phos)NNSSSPTLRPK.P	Q9XZ34	Rif1	Telomere-associated protein RIF1 OS=Drosophila melanogaster OX=7227 GN=Rif1 PE=1 SV=1	-4.02068	-2.89777	-2.6011	-3.65513	-3.62518	-3.34216	-4.62952	-5.57733	1	0.119757	T967
K.GFAS(phos)FFNSQNSNDSTSN(d)GAFDNSADSAAER.K	Q9VEJ1	SF1	LD36095p OS=Drosophila melanogaster OX=7227 GN=SF1 PE=1 SV=3	-3.08182	-4.68234	-3.3834	-3.55169	-2.93719	-3.30516	-2.76163	-9.68962	0.999	0.541855	S245
R.SFLTFGFGAGGS(phos)GPSR.R	Q9W002	msn	Misshapen isoform A OS=Drosophila melanogaster OX=7227 GN=msn PE=1 SV=3	-6.83732	-6.69785	-7.03785	-8.07753	-7.95288	-7.34271	-7.07991	-10.2653	0.998	0.212613	S1154
K.IKDEPTKESVDEDAES(phos)EEDLEMAK.E	Q9VKB9	Rab3-GAP	Rab3 GTPase-activating protein regulatory subunit OS=Drosophila melanogaster OX=7227 GN=Rab3-GAP PE=1 SV=2	0.691278	0.576455	0.620094	0.38986	0.593608	0.318632	-0.976263	-1.64877	0.998	0.0874341	S927
R.TES(phos)ESS(phos)VEEVPTKR.V	A0A0B4KFB8	CG33097	Uncharacterized protein isoform C OS=Drosophila melanogaster OX=7227 GN=CG33097 PE=1 SV=1	-5.1854	-4.10847	-4.44652	-4.26533	-6.83158	-5.17681	-4.9392	-5.0458	0.997	0.0750076	S544,S547
K.KEDNSEKDEEN(d)SEDGDEPEDEADEKAS(phos)DEESEK.K	A1ZAK4	Dek	Dek isoform A OS=Drosophila melanogaster OX=7227 GN=Dek PE=1 SV=1	-8.0713	-7.96386	-8.70348	-8.67239	-10.1784	-9.38262	-8.55273	-9.28041	0.996	0.0319613	S134
R.AAS(phos)PKPTFSK.D	M9PDL0	EG:152A3.3	Uncharacterized protein isoform B OS=Drosophila melanogaster OX=7227 GN=EG:152A3.3 PE=4 SV=1	1.64393	0.874562	0.620094	1.54938	0.522249	2.83232	0.152543	-2.80444	0.996	0.387365	S27
K.VAS(phos)FTVEK.S	Q5BHU8	capu	AT04667p OS=Drosophila melanogaster OX=7227 GN=capu PE=2 SV=1	-3.82647	-4.2672	-4.07595	-4.31529	-4.46912	-4.47456	-4.98881	-6.53535	0.996	0.0728178	S389
K.S(phos)LPDRDDVNT(phos)PGSWR.T	Q7PLL3	eIF4B	Eukaryotic initiation factor 4B OS=Drosophila melanogaster OX=7227 GN=eIF4B PE=1 SV=1	-9.24284	-8.21687	-8.062	-9.10675	-10.1932	-9.5026	-9.57158	-9.34	0.995	0.0241437	S213,T222
R.HLS(phos)ESESSLEMDEER.F	Q9VVC8	Dmel\CG6664	LD23434p OS=Drosophila melanogaster OX=7227 GN=Dmel\CG6664 PE=1 SV=1	-2.24126	-2.94173	-2.40773	-2.9021	-3.25768	-3.06973	-4.21859	-3.92665	0.995	0.0173726	S297
K.LNQS(phos)NGNLSSGNVSDYLAYIEYR.D	A0A0B4KEE4	koi	Klaroid isoform A OS=Drosophila melanogaster OX=7227 GN=koi PE=1 SV=1	-5.32512	-4.12358	-4.8405	-5.71197	-4.18355	-5.49457	-8.82175	-5.47757	0.994	0.334605	S139
R.PFLPGGTLDDLVAES(phos)PR.K	P23226	Map205	205 kDa microtubule-associated protein OS=Drosophila melanogaster OX=7227 GN=Map205 PE=1 SV=2	-5.13777	-4.07626	-4.73766	-4.84593	-5.77127	-6.05	-5.70351	-5.24559	0.993	0.0102227	S284
R.NNS(phos)N(d)GNFQPLPER.G	Q9VMW4	Rtnl1	Reticulon-like protein OS=Drosophila melanogaster OX=7227 GN=Rtnl1 PE=1 SV=1	11.7657	4.17963	5.49602	5.44829	9.71348	4.21185	4.43145	4.56427	0.992	0.629505	S14
M(ac)EPHQDSPVY(phos)ANYEDMR.N	Q9VWL0	Mec2	Mec2 OS=Drosophila melanogaster OX=7227 GN=Mec2 PE=1 SV=1	-5.43597	-5.74761	-7.17673	-6.90993	-7.35305	-7.84468	-5.29713	-8.74272	0.992	0.242757	Y11
K.KPAAQEVS(phos)PTN(d)GSSEPSK.R	C0P8M5	Nop60B-RC	MIP05689p (Fragment) OS=Drosophila melanogaster OX=7227 GN=Nop60B-RC PE=2 SV=1	-7.40861	-8.51855	-7.17449	-8.1434	-10.2173	-8.66033	-8.33606	-7.98986	0.99	0.11172	S455
K.SDIADVGGDT(phos)LSDVDADDLVLVK.K	Q9V3X4	Seipin	Seipin OS=Drosophila melanogaster OX=7227 GN=Seipin PE=1 SV=1	-1.40092	-1.42758	-0.816653	-1.20588	-1.29955	-0.0896799	-3.62135	-3.8024	0.99	0.277524	T333
K.SLSQS(phos)EEEMEIVK.S	Q9VML2	bchs	Blue cheese OS=Drosophila melanogaster OX=7227 GN=bchs PE=4 SV=4	1.81914	2.2022	1.81756	1.89892	1.46332	1.74322	-2.89322	3.46985	0.989	0.450584	S3245
R.KIS(phos)TS(phos)SS(phos)VEGSTVGR.K	Q961G1	Cog3	Conserved oligomeric Golgi complex subunit 3 OS=Drosophila melanogaster OX=7227 GN=Cog3 PE=1 SV=1	-8.11675	-1.62397	-1.51167	-2.12432	-5.61599	-3.76273	-2.68297	-5.26395	0.987	0.551608	S842,S844,S846
R.SRPPS(phos)FAGGDS(phos)PVLR.S	A1Z7A6	Asap	ArfGAP with SH3 domain ANK repeat and PH domain-containing protein OS=Drosophila melanogaster OX=7227 GN=Asap PE=1 SV=1	-0.799121	-1.59297	-0.276411	-0.272935	-3.16054	-4.14539	0.041092	0.37873	0.986	0.389459	S732,S738
K.EFAEGIHLEDGMDEDQDEDDY(phos)S(phos)NGGAAR.K	A8JQY2	anon-87Ab	Uncharacterized protein isoform C OS=Drosophila melanogaster OX=7227 GN=anon-87Ab PE=1 SV=1	-5.06358	-1.7502	-1.13287	-1.51086	-2.72386	-3.76273	-3.96794	-2.94544	0.986	0.298721	Y566,S567
R.SRS(phos)RS(phos)PLKR.A	Q7KMJ6	nito	RNA-binding protein spenito OS=Drosophila melanogaster OX=7227 GN=nito PE=1 SV=1	-3.32351	-5.24531	-3.86927	-3.8378	-4.8513	-5.3519	-4.89124	-5.12327	0.985	0.04672	S595,S597
R.T(phos)NSETLVPAIPASNVLC(cam)QPDER.H	Q9VID9	BEST:LD19244	Uncharacterized protein isoform B OS=Drosophila melanogaster OX=7227 GN=BEST:LD19244 PE=1 SV=3	-0.72027	-0.85739	-0.580434	-0.447659	-0.166417	-1.93397	-0.942776	-3.50361	0.985	0.184867	T1016
R.TKT(phos)PS(phos)EEAPQEEEQVKK.S	B7Z0I8	CG14896	Uncharacterized protein OS=Drosophila melanogaster OX=7227 GN=CG14896 PE=1 SV=1	-7.30239	-6.88772	-7.12388	-7.34648	-8.77817	-8.08778	-7.44272	-8.28363	0.983	0.0131472	T3361,S3363
R.QFT(phos)LPSGLPSYTHSAGTSPK.Q	A1Z7A6	Asap	ArfGAP with SH3 domain ANK repeat and PH domain-containing protein OS=Drosophila melanogaster OX=7227 GN=Asap PE=1 SV=1	-1.441	-3.40946	-1.78323	-2.65692	-4.84266	-5.56281	-1.37953	-1.43873	0.983	0.395844	T767
K.KDKT(phos)PPQDNVDKEAENVDK.Q	P25171	Rcc1	Regulator of chromosome condensation OS=Drosophila melanogaster OX=7227 GN=Rcc1 PE=1 SV=2	-8.00998	-7.41052	-7.06665	-7.13311	-9.07731	-8.06451	-8.05321	-8.35266	0.982	0.0181413	T443
R.GLS(phos)NS(phos)TEELHPAPPQIDAIKPFDELESK.N	Q8INM3	sle	Protein slender lobes OS=Drosophila melanogaster OX=7227 GN=sle PE=1 SV=1	-3.1749	-3.96775	-3.30931	-3.33006	-3.87092	-4.93528	-4.37471	-4.52499	0.981	0.0112808	S561,S563
R.GRT(phos)PS(phos)LERER.E	Q9VWN4	Flacc	Fl(2)d-associated complex component OS=Drosophila melanogaster OX=7227 GN=Flacc PE=1 SV=1	0.420069	1.42173	0.589514	0.926213	1.25272	1.79029	-3.84674	0.243152	0.98	0.434451	T269,S271
K.SSEQYNPGS(phos)PTSESNDAQPSEK.K	Q7KRW8	CG1646	Pre-mRNA-processing factor 39 OS=Drosophila melanogaster OX=7227 GN=CG1646 PE=1 SV=1	-2.80114	-3.02203	-3.17024	-2.91489	-3.92917	-4.77829	-3.7174	-3.39849	0.979	0.0151227	S309
R.AC(cam)HDS(phos)GEELDDISLPK.T	Q9V424	MBD-like	Methyl-CpG binding domain protein-like isoform B OS=Drosophila melanogaster OX=7227 GN=MBD-like PE=1 SV=1	-1.61861	-2.09641	-2.07823	-1.51572	-1.64899	-1.6031	-5.53435	-2.43599	0.978	0.294506	S132
W.KPT(phos)ALLC(cam)K.R	Q9VUA0	CG8833	G patch domain-containing protein 1 homolog OS=Drosophila melanogaster OX=7227 GN=CG8833 PE=2 SV=1	2.65442	3.12585	2.84578	2.66116	1.68022	1.52515	1.7489	2.42141	0.978	0.00515815	T600
K.SAS(phos)IEGVVK.K	H0RNN8	CG13096-RA	FI17503p1 OS=Drosophila melanogaster OX=7227 GN=CG13096-RA PE=1 SV=1	-3.99128	-4.1725	-4.32659	-4.033	-4.83836	-5.29275	-5.17247	-5.11491	0.974	0.000798895	S18
R.QRGS(phos)QGS(phos)ITAK.S	Q9VJ30	Nak	Numb-associated kinase isoform A OS=Drosophila melanogaster OX=7227 GN=Nak PE=1 SV=2	-2.62663	-2.2888	-2.6296	-3.27629	-3.67416	-3.75439	-3.72789	-3.55918	0.974	0.00407569	S617,S620
R.DDNES(phos)S(phos)DDDILSVSPAK.N	B5RJH6	CG17494-RB	GH14730p (Fragment) OS=Drosophila melanogaster OX=7227 GN=CG17494-RB PE=2 SV=1	-9.54213	-8.86411	-4.58849	-4.13998	-6.50281	-9.19043	-8.52319	-6.81357	0.974	0.512534	S628,S629
K.QSTEVELAAQTSS(phos)SPAGTPAR.T	Q8SX89	kuk	Kugelkern isoform A OS=Drosophila melanogaster OX=7227 GN=kuk PE=1 SV=1	-6.28341	-6.04078	-6.05655	-6.0526	-7.41574	-6.38888	-6.71457	-7.80382	0.972	0.0200463	S341
R.ADKLEQKN(d)EGKPNATEEDS(phos)DEEM(ox)LLIR.S	Q5U0X8	Dmel\CG12325	LD10780p OS=Drosophila melanogaster OX=7227 GN=Dmel\CG12325 PE=1 SV=1	-2.14248	-3.02203	-2.43262	-2.22419	-2.63727	-3.41914	-3.9638	-3.68801	0.972	0.0248085	S916
R.MGFQGNDTNSVES(phos)DSQLT(phos)TGSASKR.S	Q961C9	Tango11	Transport and Golgi organization protein 11 OS=Drosophila melanogaster OX=7227 GN=Tango11 PE=1 SV=1	3.625	-2.46202	-3.32943	-2.85208	-2.18422	-1.9867	-2.54516	-2.18585	0.971	0.536228	S183,T188
K.FVVEES(phos)DES(phos)EDEDQKRR.T	Q9VID9	BEST:LD19244	Uncharacterized protein isoform B OS=Drosophila melanogaster OX=7227 GN=BEST:LD19244 PE=1 SV=3	-2.00259	-1.12554	-1.63143	-1.15192	-1.41088	-2.81443	-1.34547	-4.22168	0.97	0.184539	S1744,S1747
R.SNMEDNAS(phos)NNS(phos)DGEEENLALKR.L	M9NDR2	BicD	Bicaudal D isoform B OS=Drosophila melanogaster OX=7227 GN=BicD PE=1 SV=1	-2.41667	-1.33307	-1.38481	-1.53532	-3.2955	-2.2136	-1.98777	-3.05104	0.97	0.0419339	S286,S289
K.EGGKES(phos)PPPPPPMK.K	A0A0B4JDC3	TTC14	Uncharacterized protein isoform B OS=Drosophila melanogaster OX=7227 GN=TTC14 PE=4 SV=1	-3.92662	-2.91958	-2.84659	-3.19142	-3.79604	-3.81726	-8.42401	-0.725867	0.97	0.528332	S586
K.SANGSN(d)AVTPT(phos)TSANTS(phos)PISGR.A	M9PB54	homer	Homer isoform F OS=Drosophila melanogaster OX=7227 GN=homer PE=1 SV=1	2.93015	1.21204	2.94775	2.62021	0.652084	1.01737	2.21898	1.94144	0.97	0.104036	T130,S136
K.KIVIEDS(phos)DDDANHS(phos)DVDPSADSS(phos)PR.K	Q9VX35	CC4	LD36501p OS=Drosophila melanogaster OX=7227 GN=CC4 PE=1 SV=1	-10.1752	-4.23129	-3.4581	-3.26643	-4.17268	-4.81597	-9.40158	-6.61557	0.969	0.613778	S101,S108,S117
R.SS(phos)PEDDKLR.R	Q9XZ21	snama	Something that sticks like glue isoform A OS=Drosophila melanogaster OX=7227 GN=snama PE=1 SV=1	-2.55645	-2.85511	-2.45795	-2.18496	-3.21525	-3.11171	-3.5313	-4.07269	0.969	0.00840247	S1090
K.IQKIS(phos)GDDDGGLDNANEGK.E	A0A0B4LGV6	Ibf1	Insulator binding factor 1 isoform B OS=Drosophila melanogaster OX=7227 GN=Ibf1 PE=1 SV=1	-2.59613	-2.13416	-2.098	-2.28927	-4.21386	-2.62773	-3.9535	-2.19133	0.967	0.0825512	S82
R.S(phos)LGTNIFGK.I	Q8MT78	Dmel\CG5522	LD24677p OS=Drosophila melanogaster OX=7227 GN=Dmel\CG5522 PE=2 SV=1	0.420069	-0.453771	0.967934	0.175967	0.195217	-0.260675	-2.09122	-0.598489	0.966	0.11555	S459
R.SS(phos)EDANEAFSK.E	Q9VID9	BEST:LD19244	Uncharacterized protein isoform B OS=Drosophila melanogaster OX=7227 GN=BEST:LD19244 PE=1 SV=3	-3.15402	-3.14511	-3.12898	-3.11421	-3.13395	-4.2169	-3.36649	-5.6845	0.965	0.116543	S1044
K.KSADS(phos)DEDDDEEEPSIQ(d)LTN(d)GWHPQK.Q	Q9VRP5	scny	Ubiquitin carboxyl-terminal hydrolase 36 OS=Drosophila melanogaster OX=7227 GN=scny PE=1 SV=3	-4.93081	-7.05531	-6.51976	-6.5575	-7.61611	-6.25113	-8.68823	-6.36719	0.965	0.199668	S748
K.IIIKNDT(phos)DEDDEM(ox)HGS(phos)PK.K	Q500Y6		SD07352p OS=Drosophila melanogaster OX=7227 PE=2 SV=1	-1.44553	-2.32472	-2.54574	-3.21652	-3.36803	-2.61258	-2.44078	-4.97228	0.965	0.171104	T698,S707
R.QS(phos)MEQLDLIK.I	Q9NFR7	pins	Rapsynoid OS=Drosophila melanogaster OX=7227 GN=pins PE=2 SV=1	-1.67062	-1.33674	-1.91149	-2.00335	-1.59358	-1.91062	-4.78517	-2.48224	0.962	0.199956	S437
R.EQQ(d)QHS(phos)PINER.E	X2JE07	Dmel\CG1677	Uncharacterized protein isoform D OS=Drosophila melanogaster OX=7227 GN=Dmel\CG1677 PE=1 SV=1	-5.50228	-8.60638	-4.33908	-4.82165	-10.6801	-4.63979	-4.49202	-7.2897	0.958	0.564168	S130
R.IEEENDSNS(phos)GEEREGK.K	X2JEN2	l(1)G0196	Inositol hexakisphosphate and diphosphoinositol-pentakisphosphate kinase OS=Drosophila melanogaster OX=7227 GN=l(1)G0196 PE=1 SV=1	-3.40222	-2.62268	-5.6155	-4.83131	-5.20278	-5.06536	-5.33941	-4.68891	0.956	0.178795	S977
R.TGDDS(phos)PLSEIPHT(phos)PTSNPR.L	E5DK16	Lpin	Lipin isoform J OS=Drosophila melanogaster OX=7227 GN=Lpin PE=1 SV=1	-1.77491	-1.92668	-1.94691	-2.20052	-3.59042	-2.48986	-2.62462	-2.96407	0.955	0.00960815	S284,T292
R.ERS(phos)LDTVER.E	Q9VWN4	Flacc	Fl(2)d-associated complex component OS=Drosophila melanogaster OX=7227 GN=Flacc PE=1 SV=1	-1.06538	0.333017	0.342947	0.253703	0.553265	0.786889	-4.95967	-0.33026	0.954	0.475944	S369
K.TDGDS(phos)EKAES(phos)EKEKDR.S	C7LAA5	CG30122-RB	GM15464p OS=Drosophila melanogaster OX=7227 GN=CG30122-RB PE=2 SV=1	-0.180246	-4.35958	-0.849795	-2.57349	-10.2029	0.205661	1.72506	-3.50361	0.953	0.720447	S471,S476
R.HNT(phos)GSKPPS(phos)PAAPPPSR.M	Q9U4I2	Smr	SANT domain protein SMRTER OS=Drosophila melanogaster OX=7227 GN=Smr PE=2 SV=1	2.45042	-1.85138	2.30858	3.07684	2.77745	1.21074	0.509647	-2.32344	0.953	0.522091	T2560,S2566
R.S(phos)LPDIPVAESNDNGS(phos)ELYETVADK.Q	C4IXX9	CG8516-RA	GM31468p (Fragment) OS=Drosophila melanogaster OX=7227 GN=CG8516-RA PE=2 SV=1	-8.14002	-7.75808	-4.98521	-5.25012	-9.73715	-6.69861	-7.34473	-6.15535	0.951	0.391913	S104,S118
K.DKSSEQYNPGS(phos)PTSESNDAQPSEK.K	Q7KRW8	CG1646	Pre-mRNA-processing factor 39 OS=Drosophila melanogaster OX=7227 GN=CG1646 PE=1 SV=1	-3.4505	-3.31393	-3.80286	-3.58604	-4.4073	-5.09453	-4.31285	-4.14314	0.951	0.00658742	S309
R.RAS(phos)C(cam)SAM(ox)DSQVAVTPR.R	B7Z0I8	CG14896	Uncharacterized protein OS=Drosophila melanogaster OX=7227 GN=CG14896 PE=1 SV=1	-7.33156	-7.68453	-6.85446	-7.96266	-10.1474	-7.39567	-7.58298	-8.51025	0.951	0.171013	S787
K.FS(phos)RS(phos)PVR.G	C1C547	SC35-RB	MIP01221p OS=Drosophila melanogaster OX=7227 GN=SC35-RB PE=2 SV=1	-1.75793	-1.72598	-1.32533	-1.91724	-2.71397	-2.84067	-2.97418	-1.99652	0.95	0.00869732	S166,S168
R.NKSELEES(phos)DT(phos)DPQEQ.K	Q7KTJ7	Bsg	Basigin isoform G OS=Drosophila melanogaster OX=7227 GN=Bsg PE=1 SV=1	-2.7332	-1.4159	-1.48974	-1.77645	-2.63727	-3.16597	-2.59231	-2.82133	0.95	0.0226624	S634,T636
K.QLLHGEPNVSY(phos)IC(cam)SR.L	E6PBX9	sgg-RD	RE23481p OS=Drosophila melanogaster OX=7227 GN=sgg-RD PE=2 SV=1	0.996538	1.67011	2.09297	1.01313	0.543	0.743397	0.288897	0.406196	0.948	0.0136074	Y768
K.QLLHGEPNVSY(phos)IC(cam)SR.Y	H5V852	sgg-RD	FI18761p1 OS=Drosophila melanogaster OX=7227 GN=sgg-RD PE=2 SV=1	0.996538	1.67011	2.09297	1.01313	0.543	0.743397	0.288897	0.406196	0.948	0.0136074	Y768
K.SEGADEVDES(phos)DDDEEAPVEKPVSK.K	P13469	mod	DNA-binding protein modulo OS=Drosophila melanogaster OX=7227 GN=mod PE=1 SV=2	-0.23401	0.750563	0.391026	0.682819	-0.688349	-0.634262	-0.482373	-0.392	0.947	0.00685569	S130
R.VM(ox)NLSGS(phos)PQSNR.E	Q9W1R5	vir	Protein virilizer OS=Drosophila melanogaster OX=7227 GN=vir PE=1 SV=1	-1.21567	-0.611246	-1.12271	-1.44913	-2.24695	-2.51078	-2.94328	-0.486493	0.947	0.117549	S1684
P.S(phos)DVIVTSSIEMPDQRPIS(phos)PLISSR.S	M9MRJ4	Msp300	Muscle-specific protein 300 kDa isoform G OS=Drosophila melanogaster OX=7227 GN=Msp300 PE=1 SV=1	-4.05069	-4.18037	-3.30317	-3.70977	-4.05574	-5.44007	-4.24347	-5.29192	0.947	0.0454906	S2264,S2281
K.RSS(phos)SKPELR.Q	Q8IGS1	GckIII	RE38276p OS=Drosophila melanogaster OX=7227 GN=GckIII PE=2 SV=1	-5.92906	-5.77121	-5.73426	-6.61141	-8.18214	-7.45928	-6.18204	-6.00886	0.947	0.113471	S455
R.TSS(phos)SDGLR.R	X2JAW9	Irk3	Inwardly rectifying potassium channel 3 isoform C OS=Drosophila melanogaster OX=7227 GN=Irk3 PE=3 SV=1	-1.18131	-1.1479	-3.90366	-1.19415	-2.13724	-4.33128	-2.10825	-2.63064	0.945	0.27081	S104
K.LGS(phos)PEPK.E	Q9VNH5	Dmel\CG2091	GH04919p OS=Drosophila melanogaster OX=7227 GN=Dmel\CG2091 PE=1 SV=1	-0.185911	-0.418403	-1.06968	-0.583917	-1.93431	-2.08259	-0.368548	-1.65255	0.945	0.0562893	S361
R.QEES(phos)EEETIPR.K	Q9VID9	BEST:LD19244	Uncharacterized protein isoform B OS=Drosophila melanogaster OX=7227 GN=BEST:LD19244 PE=1 SV=3	-2.02951	-1.70688	-1.81016	-1.71928	-1.6396	-3.11171	-1.88146	-4.40557	0.943	0.157053	S1006
R.EFC(cam)ESNPHIQQEGGAAGS(phos)GGS(phos)AGQAR.S	Q59E34	Mi-2	Mi-2 isoform B OS=Drosophila melanogaster OX=7227 GN=Mi-2 PE=1 SV=1	-7.56361	-7.43796	-7.33292	-7.4233	-9.40443	-7.4944	-8.26507	-8.3645	0.943	0.0426969	S203,S206
K.SNDSEVIEASPTAAS(phos)PSPR.A	A1Z987	Cap-G	Chromosome associated protein G isoform F OS=Drosophila melanogaster OX=7227 GN=Cap-G PE=1 SV=2	3.71642	3.59472	3.13938	3.06672	1.54274	1.92939	3.40046	2.88385	0.94	0.0669041	S1129
K.HLPIAPNDDTQS(phos)LASVAGGTGAAGTVK.K	Q9NCC3	SH3PX1	Sorting nexin OS=Drosophila melanogaster OX=7227 GN=SH3PX1 PE=1 SV=1	-5.62826	-5.9572	-6.25536	-6.38254	-7.56975	-7.66642	-5.48606	-7.25993	0.94	0.104726	S158
K.YNQQNS(phos)SNLNAC(cam)M(ox)GSTDPNKVVEK.I	Q9VI56	Dmel\CG1943	GEO05313p1 OS=Drosophila melanogaster OX=7227 GN=Dmel\CG1943 PE=1 SV=1	-6.07842	-6.12951	-6.90558	-6.62143	-7.39285	-7.22746	-7.85007	-7.018	0.938	0.0112586	S52
K.SPIVFELTQPS(phos)PEK.Q	A0A0B4JCV4	tacc	Transforming acidic coiled-coil protein isoform J OS=Drosophila melanogaster OX=7227 GN=tacc PE=1 SV=1	2.20916	2.89543	2.21151	2.68518	2.39063	1.02344	1.85524	0.993924	0.935	0.0392713	S610
K.IPASPIIGNMAELLETS(phos)VGR.T	B7Z0I8	CG14896	Uncharacterized protein OS=Drosophila melanogaster OX=7227 GN=CG14896 PE=1 SV=1	-7.98448	-8.40589	-8.48224	-9.13519	-8.88765	-8.97055	-9.38377	-10.5067	0.935	0.0619508	S919
I.LN(d)GGGGTSSVVGGASNGNFTDTEC(cam)DRMSSSALSEM(ox)YIRS(phos)R.T	E1JIH1	Unc-115a	Uncoordinated 115a isoform J OS=Drosophila melanogaster OX=7227 GN=Unc-115a PE=4 SV=1	-0.523327	-8.59064	-2.12479	-2.48505	-7.86628	-3.01892	-2.90309	-3.66649	0.933	0.64439	S334
R.RTS(phos)VKSEDLDQQEKPEKT(phos)SR.S	B7Z0B0	sowah	Sosondowah isoform G OS=Drosophila melanogaster OX=7227 GN=sowah PE=1 SV=2	-1.64959	-1.24438	-1.7568	-1.93666	-2.51213	-1.64487	-3.67111	-2.48898	0.932	0.0622184	S164,T179
R.R(ac)TS(phos)AQ(d)QSPSGPSNAK.R	X2JDP6	Ndf	Uncharacterized protein isoform C OS=Drosophila melanogaster OX=7227 GN=Ndf PE=4 SV=1	-7.60836	-5.33625	-7.63176	-7.68183	-8.15194	-7.89658	-8.06027	-7.87821	0.932	0.12896	S225
K.SPANQDTLAVNKS(phos)PAK.T	A0A0B4LGG6	Lpt	Lost PHDs of trr isoform B OS=Drosophila melanogaster OX=7227 GN=Lpt PE=1 SV=1	2.74156	1.14138	1.61485	1.69845	2.04638	1.65209	0.988252	-1.21859	0.932	0.247893	S974
R.HSQLSGS(phos)AR.S	Q94546	Atu	Another transcription unit protein OS=Drosophila melanogaster OX=7227 GN=Atu PE=1 SV=2	-3.40046	-3.50516	-5.32092	-4.63665	-4.53719	-4.95808	-5.56538	-5.52659	0.931	0.100652	S81
K.N(d)GNAS(phos)PDRN(d)NESMDD	A0A0C4DHG5	B52	B52 isoform O OS=Drosophila melanogaster OX=7227 GN=B52 PE=4 SV=1	-6.7187	-7.86575	-6.75233	-7.38296	-8.44435	-8.48237	-7.88408	-7.62712	0.93	0.0293199	S346
K.LEQKN(d)EGKPNATEEDS(phos)DEEMLLIR.S	Q5U0X8	Dmel\CG12325	LD10780p OS=Drosophila melanogaster OX=7227 GN=Dmel\CG12325 PE=1 SV=1	-6.77588	-6.18126	-4.90871	-5.52791	-9.57262	-5.74242	-6.04454	-5.75414	0.93	0.351423	S916
R.T(phos)PQPLESGSSVAPSVTQR.G	M9PB69	Piezo	Piezo-type mechanosensitive ion channel component OS=Drosophila melanogaster OX=7227 GN=Piezo PE=1 SV=1	-2.17967	-2.74392	-2.24457	-2.94079	-4.51643	-3.00897	-3.15114	-3.14359	0.928	0.0474979	T380
R.HASS(phos)NSSLQQPDQR.S	Q9VB98	CG5521	Probable Rho GTPase-activating protein CG5521 OS=Drosophila melanogaster OX=7227 GN=CG5521 PE=1 SV=2	-0.0996101	-0.250051	-0.203197	0.171439	-2.57334	-0.0636958	-0.236278	-1.2158	0.927	0.13267	S1549
R.LGS(phos)ETPAENNFTH.H	V9GZW9		Uncharacterized protein OS=Drosophila melanogaster OX=7227 PE=4 SV=1	-5.71297	-4.01393	-4.02965	-3.96762	-3.73881	-6.64832	-4.49799	-6.54654	0.927	0.273368	S294
K.KHQPS(phos)DS(phos)ENEDDQDEDDDGNSSIEER.R	P22058	D1	Chromosomal protein D1 OS=Drosophila melanogaster OX=7227 GN=D1 PE=1 SV=3	-3.5175	-2.2263	-2.79189	-3.17288	-3.67992	-5.3171	-3.01643	-3.39849	0.926	0.129698	S134,S136
R.SM(ox)S(phos)PAVAQNHPISR.P	B6IDZ6	osa-RC	LD42748p (Fragment) OS=Drosophila melanogaster OX=7227 GN=osa-RC PE=2 SV=1	1.84715	-2.94173	-3.79208	-3.8378	0.182048	-3.92354	-4.63939	-4.04664	0.926	0.579694	S526
K.HEEPVKS(phos)EES(phos)DKDDEDITEFR.L	Q9VVK8	cg5589	Uncharacterized protein OS=Drosophila melanogaster OX=7227 GN=cg5589 PE=3 SV=1	-0.0574557	0.866619	0.843871	0.734894	1.0209	0.849762	-1.68127	-1.502	0.925	0.23046	S46,S49
K.SQPSS(phos)PPTGSPM(ox)DK.I	Q9U5L1	Gtp-bp	Signal recognition particle receptor subunit alpha homolog OS=Drosophila melanogaster OX=7227 GN=Gtp-bp PE=1 SV=2	-5.16139	-6.43403	-5.23668	-5.4002	-6.70718	-6.67324	-5.78151	-6.7644	0.924	0.0397977	S175
K.NDDGYSS(phos)SDDEKPTK.K	Q9VUX1	mRpS31	Mitochondrial ribosomal protein S31 OS=Drosophila melanogaster OX=7227 GN=mRpS31 PE=1 SV=1	-4.44806	-5.15975	-4.34537	-3.8065	-5.77949	-4.73828	-5.43359	-5.5046	0.924	0.0326634	S42
R.S(phos)QPDLMLLNNS(phos)GDGVTSAK.A	Q9VED0	CG7218	Protein TAPT1 homolog OS=Drosophila melanogaster OX=7227 GN=CG7218 PE=2 SV=2	1.10104	-2.43036	-2.2083	-1.32452	-3.70906	-1.66036	-1.09291	-2.09576	0.924	0.339724	S616,S626
K.QQYVT(phos)PTPS(phos)PR.H	Q8T9F6	Pvr	SD03187p OS=Drosophila melanogaster OX=7227 GN=Pvr PE=2 SV=1	-7.23569	-6.9874	-7.16779	-6.97269	-8.4868	-7.54872	-7.76693	-8.25765	0.924	0.00677391	T1392,S1396
R.SNS(phos)PTNDKDEVVADHGGES(phos)PGGGGDPILDR.S	X2JE07	Dmel\CG1677	Uncharacterized protein isoform D OS=Drosophila melanogaster OX=7227 GN=Dmel\CG1677 PE=1 SV=1	-0.516173	-0.700472	-0.622774	-0.918424	-1.50572	-1.66426	-1.65183	-1.62634	0.923	0.000632746	S26,S42
K.VGADDYEEDDVDEEETKAQPKDS(phos)K.A	Q9VL50	Trp1	RE23984p OS=Drosophila melanogaster OX=7227 GN=Trp1 PE=1 SV=1	-1.11136	-1.27217	-1.01854	-1.44913	-1.75138	-2.20789	-2.07438	-2.50936	0.923	0.00339435	S383
R.SMS(phos)DNEASSQEMSTNLR.V	A0A0B4K863	cnn	Centrosomin isoform L OS=Drosophila melanogaster OX=7227 GN=cnn PE=1 SV=1	4.98679	4.12241	4.0672	3.77492	2.87887	-0.398403	5.94507	4.83237	0.923	0.497063	S604
R.N(d)GGGRS(phos)PQGAMQVR.Q	Q9VHK8	aqz	LD47990p OS=Drosophila melanogaster OX=7227 GN=aqz PE=2 SV=2	-3.28247	-3.89681	-3.39967	-3.60042	-4.00426	-4.82991	-4.04238	-4.99127	0.922	0.0166947	S156
R.ERQS(phos)PEGVSATESEREDQPEEC(cam)LR.H	M9PHR5	Ect4	Ectoderm-expressed 4 isoform K OS=Drosophila melanogaster OX=7227 GN=Ect4 PE=1 SV=1	-3.02656	-2.65891	-2.78119	-3.06352	-4.72288	-3.5501	-3.74911	-3.19769	0.922	0.0285523	S1630
K.ELAEDS(phos)KDS(phos)DSKPEDK.Q	A0A0B4KEI5	Ars2	Arsenic resistance protein 2 isoform E OS=Drosophila melanogaster OX=7227 GN=Ars2 PE=1 SV=1	-1.1404	-0.122835	-0.449771	-0.630596	-1.53152	-1.84719	-1.27006	-1.37812	0.921	0.00941273	S346,S349
K.RQDS(phos)DSRLPTNFER.G	Q9W002	msn	Misshapen isoform A OS=Drosophila melanogaster OX=7227 GN=msn PE=1 SV=3	-6.41491	-6.27938	-6.81902	-6.65021	-7.27659	-7.30132	-7.42668	-7.84191	0.921	0.0031149	S800
K.RDNTQVQDMDEAS(phos)S(phos)DEDTPTTK.L	Q9VEP9	Sf3a1	GH03554p OS=Drosophila melanogaster OX=7227 GN=Sf3a1 PE=1 SV=1	-5.00365	-2.74392	-2.33553	-2.62507	-5.42334	-3.41914	-3.60676	-3.93398	0.919	0.234106	S372,S373
R.RQS(phos)LHVPSPELAAK.N	Q8INM3	sle	Protein slender lobes OS=Drosophila melanogaster OX=7227 GN=sle PE=1 SV=1	-8.48865	-8.19117	-8.20563	-9.0881	-9.20435	-9.55725	-9.4545	-9.42915	0.918	0.00665929	S1000
R.SDKLS(phos)PTS(phos)PSGNTQGTR.A	Q9VQ76	tho2	LD36155p OS=Drosophila melanogaster OX=7227 GN=tho2 PE=1 SV=2	-3.05393	-2.78337	-3.04982	-2.94079	-4.67225	-3.99246	-3.22354	-3.61257	0.918	0.022309	S1282,S1285
K.N(d)(ac)IDDDADDADS(phos)ADQGQHNSKK.E	P22058	D1	Chromosomal protein D1 OS=Drosophila melanogaster OX=7227 GN=D1 PE=1 SV=3	-7.73375	-6.85373	-8.12552	-8.49608	-8.37794	-9.25338	-7.42668	-9.81624	0.916	0.161882	S300
R.W(ac)VEENIPSSM(ox)ADSALPILDS(phos)DEEIINTK.F	Q9VQ34	Dmel\CG17660	GH17801p OS=Drosophila melanogaster OX=7227 GN=Dmel\CG17660 PE=1 SV=3	-5.95979	-6.07954	-5.60792	-6.87754	-7.3555	-5.45621	-9.1334	-6.24366	0.916	0.274954	S522
R.VDS(phos)N(d)ATDLRS(phos)LGSLGYLLDQPDEGASNSQHSIPHMR.K	Q9VP46	Q9VP46	GH16847p OS=Drosophila melanogaster OX=7227 GN=Q9VP46 PE=1 SV=1	2.57569	0.706743	7.26357	1.03821	1.78846	1.96769	2.33903	1.83093	0.915	0.529153	S1102,S1109
G.V(ac)MVTAS(phos)HNPK.E	Q5BHU7	Pgm2a	AT01222p (Fragment) OS=Drosophila melanogaster OX=7227 GN=Pgm2a PE=2 SV=1	1.12412	1.28538	1.46005	1.47783	0.246724	0.128873	0.46236	0.847999	0.915	0.00326096	S134
K.DEPLDGAIDS(phos)GS(phos)SLDQDGPPPSKR.I	A8MPH9	kay	Transcription factor kayak isoforms D/sro OS=Drosophila melanogaster OX=7227 GN=kay PE=1 SV=2	7.10023	6.11815	6.67659	6.59638	6.78499	6.65484	5.40353	3.99197	0.914	0.191226	S544,S546
R.DPS(phos)TTTTTTTTR.Q	M9MRJ4	Msp300	Muscle-specific protein 300 kDa isoform G OS=Drosophila melanogaster OX=7227 GN=Msp300 PE=1 SV=1	-2.68962	-3.86896	-3.51722	-3.50456	-4.28816	-4.28732	-4.75624	-3.90129	0.913	0.0204373	S449
K.ALIT(phos)LDGESS(phos)AEDDPIILQK.E	Q7JZ25	ClC-b	Chloride channel protein OS=Drosophila melanogaster OX=7227 GN=ClC-b PE=1 SV=1	-5.55604	-5.38397	-0.0493005	-0.0328346	-4.27357	-9.5388	-0.378846	-0.48481	0.913	0.717075	T10,S16
I.RAGS(phos)NDR.F	Q9VRD0	Ser6	RE66795p OS=Drosophila melanogaster OX=7227 GN=Ser6 PE=2 SV=1	-3.12471	-3.04582	-3.17024	-3.92045	-4.65325	-4.16294	-4.31285	-3.78242	0.913	0.0137616	#N/A
K.VPS(phos)PSS(phos)KDEEHLK.T	Q9VJ12	Acn	Acinus isoform A OS=Drosophila melanogaster OX=7227 GN=Acn PE=1 SV=1	-4.48111	-4.68982	-4.61483	-4.9213	-3.6457	-6.72444	-6.09798	-5.88296	0.911	0.190262	S198,S201
S.RSPSRS(phos)PSR.R	X2JIN0	CG3950	Uncharacterized protein isoform W OS=Drosophila melanogaster OX=7227 GN=CG3950 PE=1 SV=1	4.34294	1.37769	0.861043	1.40898	2.35879	0.772537	1.06623	0.148745	0.911	0.315464	S2257
K.S(phos)TQNLFDQHGNPIDLR.Q	Q8ST50	mdy	O-acyltransferase OS=Drosophila melanogaster OX=7227 GN=mdy PE=2 SV=1	1.25534	-0.520952	0.215235	-0.643835	0.195217	0.328476	-3.44222	-0.419061	0.911	0.346972	S53
K.DKS(phos)EGDSPNIETPK.K	P91638	smid	Smallminded protein OS=Drosophila melanogaster OX=7227 GN=smid PE=1 SV=1	4.32646	6.73754	7.1037	6.86964	3.76861	5.16109	6.03872	6.42292	0.911	0.294769	S540
K.QS(phos)QSQSKAPPS(phos)PK.T	Q9VRP5	scny	Ubiquitin carboxyl-terminal hydrolase 36 OS=Drosophila melanogaster OX=7227 GN=scny PE=1 SV=3	-3.91905	-5.93038	-4.54803	-5.41465	-9.9868	-4.28491	-3.74555	-5.43536	0.91	0.523407	S771,S780
R.AT(phos)PPGTQDADEGHDVSDTFYTSQR.K	Q9VZW0	Sk2	LD11247p OS=Drosophila melanogaster OX=7227 GN=Sk2 PE=2 SV=3	-1.07236	-1.58424	-1.16727	-1.58553	-1.81862	-1.78643	-3.23596	-2.20789	0.91	0.0376112	T20
R.QEQINAHS(phos)PVSSK.F	A0A0B4JCV4	tacc	Transforming acidic coiled-coil protein isoform J OS=Drosophila melanogaster OX=7227 GN=tacc PE=1 SV=1	3.97098	5.59159	4.14812	4.88846	4.39338	4.19849	3.37515	2.99505	0.909	0.0944943	S407
R.S(phos)KAAGDHLETR.S	X2JAW9	Irk3	Inwardly rectifying potassium channel 3 isoform C OS=Drosophila melanogaster OX=7227 GN=Irk3 PE=3 SV=1	-1.90592	-1.38903	-0.784254	-1.15571	-2.09816	-2.68997	-1.82875	-2.253	0.909	0.0188296	S64
R.S(phos)GS(phos)PDRDVAAPER.R	Q500Y6		SD07352p OS=Drosophila melanogaster OX=7227 PE=2 SV=1	1.35625	0.784685	0.791096	0.639762	0.195217	0.495075	0.68467	-1.43548	0.908	0.100296	S810,S812
R.LEHEVHQLRQDT(phos)PPAAGEDSAGNAS(phos)PTR.L	A1ZBE8	CG15099	Protein dopey-1 homolog OS=Drosophila melanogaster OX=7227 GN=CG15099 PE=1 SV=1	-6.69265	-5.81142	-6.85446	-6.8896	-6.88557	-8.14941	-9.29566	-5.54892	0.908	0.281726	T1745,S1758
K.PAPGGAAGIHS(phos)PTHR.D	Q9NH51	lqfR	Epsin-like protein OS=Drosophila melanogaster OX=7227 GN=lqfR PE=2 SV=1	1.13173	-0.571854	-0.0191402	-0.921646	-0.515336	1.46394	-3.3529	-1.60425	0.907	0.398817	S311
R.YNS(phos)NDNSLRPTNNK.A	Q8SWR8	Atx2	Ataxin-2 homolog OS=Drosophila melanogaster OX=7227 GN=Atx2 PE=1 SV=1	-4.49981	-4.71248	-4.91806	-4.82165	-5.76309	-5.557	-5.59709	-5.65999	0.906	0.00081163	S26
K.LNFGQTTNSTS(phos)PPES(phos)PDALK.C	Q9V7H4	CG8370	Transmembrane protein 131 homolog OS=Drosophila melanogaster OX=7227 GN=CG8370 PE=1 SV=2	-2.9997	-0.654026	-0.0238606	-0.344624	-1.13559	-2.44893	-1.86207	-2.19682	0.905	0.22395	S1331,S1335
R.SRPSPSDS(phos)PMSR.N	Q0KHR5	RhoGAP15B	Rho GTPase activating protein at 15B isoform B OS=Drosophila melanogaster OX=7227 GN=RhoGAP15B PE=1 SV=1	-5.14364	-4.57806	-4.08382	-5.01178	-6.1539	-4.64286	-6.32339	-5.31566	0.905	0.0762147	S368
K.LREES(phos)PDS(phos)ETDNQVNR.F	Q9Y095	XRCC1	FI04011p OS=Drosophila melanogaster OX=7227 GN=XRCC1 PE=1 SV=1	-0.674418	0.161836	0.188278	-0.131951	-1.43097	-1.79069	-0.506633	-0.343923	0.904	0.0533506	S178,S181
R.FEAIHAGNSFGFDS(phos)PQR.Q	Q9VGH0	Dmel\CG6962	LD28817p OS=Drosophila melanogaster OX=7227 GN=Dmel\CG6962 PE=1 SV=1	-5.31184	-4.87771	-6.20875	-5.78519	-5.67611	-5.88075	-7.68287	-6.55782	0.904	0.115814	S469
K.RKLS(phos)EEYTSSSAQK.K	Q7K180	Map60	LD02709p OS=Drosophila melanogaster OX=7227 GN=Map60 PE=1 SV=1	-8.01428	-7.15321	-7.40203	-8.08214	-9.16075	-7.63915	-10.0808	-7.3809	0.902	0.194839	S242
K.ADSGPFLFTPIHFNS(phos)VDRR.D	Q9VIL0	brun	Protein brunelleschi OS=Drosophila melanogaster OX=7227 GN=brun PE=1 SV=2	-1.17379	-2.88699	-2.97478	-3.15609	-3.50786	-3.03903	-3.18689	-4.06262	0.901	0.10495	S673
K.SPS(phos)PVIKK.S	A1ZAK4	Dek	Dek isoform A OS=Drosophila melanogaster OX=7227 GN=Dek PE=1 SV=1	-6.56747	-6.64457	-7.21768	-7.54837	-7.23756	-7.03261	-10.1808	-7.12968	0.901	0.26031	S95
K.ESS(phos)S(phos)PATPPPVR.R	M9PG50	Cdk12	Cyclin-dependent kinase 12 isoform C OS=Drosophila melanogaster OX=7227 GN=Cdk12 PE=4 SV=1	-1.46376	-1.5329	-1.88262	-1.1109	-2.3051	-2.73847	-3.11627	-1.43223	0.9	0.0502781	S214,S215
R.KVLS(phos)DNR.I	Q9VWN1	CG42506	LD15404p1 OS=Drosophila melanogaster OX=7227 GN=CG42506 PE=2 SV=2	2.52168	3.7431	2.29916	3.05857	2.50345	2.05922	1.75676	1.70388	0.9	0.041131	S405
R.SQS(phos)PDIDS(phos)PSSR.S	R9PY73	wcy	Wacky isoform C OS=Drosophila melanogaster OX=7227 GN=wcy PE=4 SV=1	0.290059	0.465134	0.0853737	-0.0951163	-0.773018	-0.538105	-1.42505	-0.111941	0.898	0.0207233	S88,S93
K.KPADSDSLDNQSKAS(phos)NEAETEK.A	E5DK16	Lpin	Lipin isoform J OS=Drosophila melanogaster OX=7227 GN=Lpin PE=1 SV=1	-4.12421	-4.13885	-4.43306	-4.94209	-6.01154	-5.03273	-4.82216	-5.35447	0.896	0.0267477	S157
K.AHILSHQVTLEDVS(phos)DDS(phos)DEEC(cam)SPK.K	Q9VFK5	Afti	Aftiphilin isoform B OS=Drosophila melanogaster OX=7227 GN=Afti PE=2 SV=3	-0.367131	7.45256	7.19116	6.96675	4.75197	4.96204	2.72894	5.2154	0.896	0.633649	S169,S172
R.SVS(phos)QTDIFTM(ox)SK.A	Q8MR20	CG6454	LD35461p OS=Drosophila melanogaster OX=7227 GN=CG6454 PE=2 SV=1	-2.38157	-3.19744	-3.23883	-3.25663	-3.7071	-4.25168	-4.19414	-3.50361	0.896	0.0167687	S388
R.DDIFFSGS(phos)LTR.I	Q7K1L4	Dmel\CG8468	SD10469p OS=Drosophila melanogaster OX=7227 GN=Dmel\CG8468 PE=1 SV=1	-8.63307	-6.47867	-6.80856	-6.54632	-4.64571	-10.4054	-10.9262	-6.07214	0.896	0.568342	S423
R.KC(cam)S(phos)LQDESTLNK.F	Q9VH03	NUAK	Uncharacterized protein isoform E OS=Drosophila melanogaster OX=7227 GN=NUAK PE=4 SV=2	-2.18723	-3.44382	-2.14522	-3.12605	-1.96329	-9.78248	-0.665637	-2.07536	0.896	0.653623	S599
K.ASEES(phos)VTS(phos)ADDAVDAVPNINSQPEK.M	Q24478	Cp190	Centrosome-associated zinc finger protein CP190 OS=Drosophila melanogaster OX=7227 GN=Cp190 PE=1 SV=2	-5.32512	-6.43403	-5.81051	-5.93337	-5.89085	-6.87826	-7.57791	-6.7385	0.896	0.0591127	S864,S867
K.EGS(phos)DEADSTGEAEQAQSDEKPSK.K	Q9I7K6	CG8223	Protein NASP homolog OS=Drosophila melanogaster OX=7227 GN=CG8223 PE=1 SV=1	-4.81391	-4.79878	-4.1211	-4.7375	-5.82982	-5.42941	-5.89516	-4.89874	0.895	0.0172708	S180
K.KS(phos)PSKEASANADK.R	Q9VG01	Dmel\CG46280	RE12073p OS=Drosophila melanogaster OX=7227 GN=Dmel\CG46280 PE=1 SV=1	-8.39049	-7.54781	-9.13751	-7.55157	-8.00205	-10.0155	-8.41977	-9.7664	0.894	0.168279	S167
R.SIS(phos)SYNR.R	B6IDZ6	osa-RC	LD42748p (Fragment) OS=Drosophila melanogaster OX=7227 GN=osa-RC PE=2 SV=1	-1.91844	-2.29591	-2.52775	-2.6895	-3.42492	-3.05943	-3.44366	-3.08123	0.894	0.00510675	S1748
K.AAS(phos)PTLSDSGSNSSGSGGGSGSVK.S	A8DYL3	Vrp1	Verprolin 1 isoform G OS=Drosophila melanogaster OX=7227 GN=Vrp1 PE=1 SV=1	-0.666476	-0.414527	-0.736982	-0.874066	-1.9003	-1.18663	-1.77336	-1.40651	0.894	0.00455304	S253
K.RNS(phos)IDLDGPENADTPETTS(phos)NKDESTEK.A	Q8MLQ5	kcc	Kazachoc isoform D OS=Drosophila melanogaster OX=7227 GN=kcc PE=1 SV=1	-5.10305	-5.05949	-3.9971	-4.49556	-5.57248	-5.81686	-5.86397	-4.97606	0.894	0.0297104	S964,S980
R.NIS(phos)VDFEK.T	M9PFQ9	CG42348	Uncharacterized protein isoform E OS=Drosophila melanogaster OX=7227 GN=CG42348 PE=1 SV=1	-4.15647	-4.72395	-4.20153	-4.38472	-5.06076	-5.16792	-5.33406	-5.47223	0.892	0.00257795	S1231
R.SM(ox)AEDGS(phos)PS(phos)PEKEKPEKLPFIK.Y	E1JIP3	WRNexo	WRN exonuclease isoform B OS=Drosophila melanogaster OX=7227 GN=WRNexo PE=4 SV=1	1.22007	-0.391483	-1.287	-0.266777	-1.50572	-0.800254	-0.863515	-1.11605	0.89	0.124334	S111,S113
R.KLS(phos)T(phos)SS(phos)VEETAAAAVSEETPSK.D	C0P8M5	Nop60B-RC	MIP05689p (Fragment) OS=Drosophila melanogaster OX=7227 GN=Nop60B-RC PE=2 SV=1	-10.4031	-6.89462	-5.70162	-4.97919	-5.43627	-8.42196	-9.98013	-7.70021	0.89	0.543162	S469,T470,S472
K.LGFDSES(phos)EESDEYTEK.M	A0A0B4LGB0	Gp150	Gp150 isoform E OS=Drosophila melanogaster OX=7227 GN=Gp150 PE=1 SV=1	-3.79842	-3.73917	-4.55895	-3.81606	-4.04827	-3.90128	-7.90616	-3.61552	0.89	0.379039	S944
R.ESIGS(phos)PNTLER.R	M9MSI8	tweek	Tweek isoform I OS=Drosophila melanogaster OX=7227 GN=tweek PE=4 SV=1	0.119868	-0.854761	-0.566592	-2.21626	-1.99285	-2.78867	-1.85247	-0.441734	0.889	0.20756	S1353
R.SNM(ox)EDNASNNS(phos)DGEEENLALK.R	M9NDR2	BicD	Bicaudal D isoform B OS=Drosophila melanogaster OX=7227 GN=BicD PE=1 SV=1	-1.91844	-1.9602	-2.66849	-2.08046	-2.97209	-2.97952	-3.38022	-2.84704	0.888	0.00638058	S289
K.SNSQSNENSEPVVNS(phos)DDEDNYSGIGR.K	Q9VN03	Suv3	ATP-dependent RNA helicase SUV3 homolog mitochondrial OS=Drosophila melanogaster OX=7227 GN=Suv3 PE=2 SV=3	3.04142	3.71018	2.45712	3.25503	1.97564	2.7596	2.93004	1.24779	0.888	0.0850145	S745
R.NYHQSKNS(phos)KELS(phos)GVIR.S	Q9NDM2	Tre1	Protein trapped in endoderm-1 OS=Drosophila melanogaster OX=7227 GN=Tre1 PE=1 SV=1	3.55596	3.12917	1.7954	3.04006	1.83968	2.05922	1.79544	2.28505	0.885	0.0533346	S363,S367
M.GKKDEKS(phos)QQGEELVK.V	Q9VYY2	Spase25	Signal peptidase complex subunit 2 OS=Drosophila melanogaster OX=7227 GN=Spase25 PE=2 SV=1	-7.07904	-6.82216	-7.51091	-7.36882	-7.61023	-7.32285	-7.48244	-9.90701	0.885	0.17483	S9
R.DDHKLDT(phos)SLDHVDEDVEDGSGENASVTSGNAS(phos)PR.R	X2JF83	URE-B1	Uncharacterized protein isoform G OS=Drosophila melanogaster OX=7227 GN=URE-B1 PE=1 SV=1	-7.37508	-6.14999	-5.63848	-6.3572	-5.89979	-10.0758	-7.33186	-5.75414	0.885	0.394373	T490,S515
R.MNS(phos)MVEPER.K	A0A0B4K6Y7	pyd	Polychaetoid isoform O OS=Drosophila melanogaster OX=7227 GN=pyd PE=1 SV=1	-4.61737	-3.57787	-3.1021	-3.12308	-3.58321	-6.95566	-3.71392	-3.70202	0.884	0.318519	S1720
K.NYSHFSNVS(phos)MEDNNSDNESQIEPLFNSSPM(ox)ASR.R	Q9VV52	RAF2	LD37257p OS=Drosophila melanogaster OX=7227 GN=RAF2 PE=1 SV=3	-6.19545	-6.23494	-5.87273	-5.55968	-5.91782	-10.1054	-5.43359	-5.94084	0.884	0.409943	S991
K.ELDT(phos)IKEGSDEADS(phos)TGEAEQAQSDEKPSK.K	Q9I7K6	CG8223	Protein NASP homolog OS=Drosophila melanogaster OX=7227 GN=CG8223 PE=1 SV=1	-3.08182	-2.59609	-2.39953	-2.41983	-3.87311	-3.22234	-3.91703	-3.02146	0.884	0.0169405	T175,S185
R.S(phos)RS(phos)MKPANNN(d)GSVPSAAR.E	Q6AWQ1	SRm160	RE71183p OS=Drosophila melanogaster OX=7227 GN=SRm160 PE=2 SV=1	-3.11459	-4.91228	-3.15636	-4.16115	-6.0508	-5.478	-3.58593	-3.76271	0.883	0.24412	S173,S175
R.IKNELPVDS(phos)DSDAPLADFLNSDSKR.S	Q9W137	Dmel\CG4707	LD29879p OS=Drosophila melanogaster OX=7227 GN=Dmel\CG4707 PE=2 SV=1	-1.01409	-0.500262	-0.0365245	0.143969	-1.99285	-3.7728	0.452714	0.37873	0.882	0.390012	S169
R.EKT(phos)PGENS(phos)LNSLEQK.D	A1ZBE8	CG15099	Protein dopey-1 homolog OS=Drosophila melanogaster OX=7227 GN=CG15099 PE=1 SV=1	-7.59543	-5.47794	-5.05564	-6.67609	-5.46251	-7.92924	-5.97623	-8.95892	0.88	0.370145	T1356,S1361
R.SKS(phos)QVDEKPQS(phos)PVPLR.R	D6W4T8	pod1	Coronin OS=Drosophila melanogaster OX=7227 GN=pod1 PE=1 SV=1	0.573261	0.148795	0.318293	-0.0521207	-0.622169	-0.615265	-0.786096	-0.505134	0.879	0.00220063	S727,S735
R.RTS(phos)VKS(phos)EDLDQQEKPEKTS(phos)R.S	B7Z0B0	sowah	Sosondowah isoform G OS=Drosophila melanogaster OX=7227 GN=sowah PE=1 SV=2	-1.34492	-1.20033	-2.25934	-2.19272	-3.10783	-2.23084	-2.4772	-2.69144	0.878	0.0324869	S164,S167,S180
K.QKDDGS(phos)QDIEHEYQIK.V	L0CQ42	Irbp	Inverted repeat-binding protein OS=Drosophila melanogaster OX=7227 GN=Irbp PE=4 SV=1	-3.6914	-3.50351	-3.46664	-3.51231	-4.4073	-4.06072	-4.38574	-4.82535	0.876	0.00322383	S314
K.SELEES(phos)DTDPQEQ.K	Q7KTJ7	Bsg	Basigin isoform G OS=Drosophila melanogaster OX=7227 GN=Bsg PE=1 SV=1	-5.22218	-4.89058	-4.71713	-5.04511	-5.66845	-5.75567	-6.07994	-5.87589	0.876	0.00205611	S634
R.NAVT(phos)SDENPILSAVNPNVPLHDSSR.D	P16620	Ptp69D	Tyrosine-protein phosphatase 69D OS=Drosophila melanogaster OX=7227 GN=Ptp69D PE=1 SV=2	-3.31852	-3.71037	-3.68253	-3.144	-4.21108	-4.45551	-4.45088	-4.242	0.876	0.0026595	T723
K.NAFDPAKDEENSS(phos)DEEKNEPVGK.A	Q9VKV5	holn1	CD2 antigen cytoplasmic tail-binding protein 2 homolog OS=Drosophila melanogaster OX=7227 GN=holn1 PE=1 SV=1	-2.3558	-2.82393	-2.95061	-3.03533	-4.43301	-3.30516	-2.36377	-4.56142	0.874	0.127773	S118
K.S(phos)PPGLGSSTPISVR.F	M9PEU6	CG43113	Uncharacterized protein isoform F OS=Drosophila melanogaster OX=7227 GN=CG43113 PE=1 SV=1	-2.64732	-2.7734	-2.32773	-3.08647	-3.92461	-3.38014	-3.45233	-3.57342	0.874	0.00579969	S55
R.RNS(phos)DDMVIDDSLSKEHDPK.I	M9PHL0	e(y)3	Enhancer of yellow 3 isoform B OS=Drosophila melanogaster OX=7227 GN=e(y)3 PE=4 SV=1	-1.61861	-0.805702	-1.88835	-1.04619	-3.17402	-1.18383	-2.11397	-2.37861	0.873	0.0964787	S518
R.IS(phos)PNAVK.M	M9MSL0	CG32108	Uncharacterized protein isoform B OS=Drosophila melanogaster OX=7227 GN=CG32108 PE=4 SV=1	2.06157	2.33478	1.90708	2.08697	1.49028	1.37649	0.659732	1.37371	0.873	0.00706618	S728
K.IHS(phos)PDQ(d)HTANAR.L	A8WHK9		Nipped-B protein OS=Drosophila melanogaster OX=7227 PE=2 SV=1	-3.87934	-7.63461	-5.35859	-7.03608	-6.64427	-6.96026	-7.3002	-6.49143	0.872	0.310517	S121
R.RHS(phos)SDDTLDNR.R	Q9VW22	l(3)76BDm	FI18195p1 OS=Drosophila melanogaster OX=7227 GN=l(3)76BDm PE=1 SV=2	-2.77813	-2.47004	-2.20115	-2.24019	-2.56443	-4.17401	-2.96381	-3.4766	0.872	0.0467564	S1260
S.EGGAGVGNISS(phos)PR.K	Q9VMJ7	lid	Lysine-specific demethylase lid OS=Drosophila melanogaster OX=7227 GN=lid PE=1 SV=1	-3.06781	-7.65203	-9.64869	-3.74586	-6.21949	-6.55269	-7.6242	-7.20039	0.871	0.570059	S1434
R.DLS(phos)PMPEHYAPR.L	Q9VWN4	Flacc	Fl(2)d-associated complex component OS=Drosophila melanogaster OX=7227 GN=Flacc PE=1 SV=1	0.670526	1.60953	1.76379	1.85253	2.33519	2.31581	-3.40807	1.17515	0.87	0.515098	S423
R.YRNS(phos)QDVELQQ(d)LPPLK.A	Q9VB23	wdb	Serine/threonine protein phosphatase 2A regulatory subunit OS=Drosophila melanogaster OX=7227 GN=wdb PE=1 SV=2	-0.542582	-1.13828	-1.55201	-1.42607	-0.915789	-0.804551	-1.42505	-4.99127	0.869	0.382889	S35
R.SPSSPAFNSIPVVSDQSLS(phos)PGSR.K	F6M9W1		CTRIP isoform B OS=Drosophila melanogaster OX=7227 PE=2 SV=1	-2.7443	-3.04582	-3.34825	-3.36823	-5.04086	-3.58516	-3.96794	-3.38587	0.868	0.0579156	S148
R.HSSHANQS(phos)QSDDEDTLGGSPSK.K	Q7JVP4	Br140	Bromodomain-containing protein 140kD isoform A OS=Drosophila melanogaster OX=7227 GN=Br140 PE=1 SV=1	-2.48022	-1.47928	-2.03311	-2.44742	-5.89085	-0.657392	-3.21122	-2.14275	0.866	0.42905	S811
P.S(phos)GMQ(d)T(phos)PRK.S	A1Z9J3	shot	Short stop isoform H OS=Drosophila melanogaster OX=7227 GN=shot PE=1 SV=1	-8.28296	-6.9243	-7.4473	-9.84554	-9.85015	-10.7094	-7.66663	-7.73563	0.865	0.374529	S8770,T8774
R.KLDSFLQDM(ox)ILAQIFKT(phos)PTGS(phos)PPR.G	X2JEN2	l(1)G0196	Inositol hexakisphosphate and diphosphoinositol-pentakisphosphate kinase OS=Drosophila melanogaster OX=7227 GN=l(1)G0196 PE=1 SV=1	-6.48619	-6.87574	-6.978	-7.56762	-10.0394	-7.3588	-7.34257	-6.6274	0.865	0.270561	T1594,S1598
K.AAS(phos)PLPTVKPASEALDFPMHR.S	Q7K3G2	Dmel\CG5742	LD29875p OS=Drosophila melanogaster OX=7227 GN=Dmel\CG5742 PE=2 SV=1	0.979766	0.00857559	0.437554	0.104927	0.271804	-0.0130908	-1.69836	-0.479774	0.863	0.103188	S72
K.SSS(phos)SGVASGSGSGGGGGGSGSGLSQR.S	M9PCT8	Abl	Abl tyrosine kinase isoform C OS=Drosophila melanogaster OX=7227 GN=Abl PE=1 SV=1	-2.89701	-3.46291	-3.48562	-3.43847	-2.13724	-6.85098	-3.98252	-3.76108	0.862	0.37365	S67
R.N(d)GTPQRPSNLGLESS(phos)PR.K	A0A0B4K6Y7	pyd	Polychaetoid isoform O OS=Drosophila melanogaster OX=7227 GN=pyd PE=1 SV=1	-2.59613	-2.9756	-2.6011	-2.8277	-3.49765	-4.10243	-3.33943	-3.50361	0.861	0.00567964	S1498
R.IKNELPVDS(phos)DS(phos)DAPLADFLNSDSKR.S	Q9W137	Dmel\CG4707	LD29879p OS=Drosophila melanogaster OX=7227 GN=Dmel\CG4707 PE=2 SV=1	-1.91217	-0.357592	-0.957058	-0.306228	-0.0530794	-3.66573	-2.3913	-0.867781	0.861	0.324952	S169,S171
K.SST(phos)PEEPDDSKDELSR.T	B7Z0I8	CG14896	Uncharacterized protein OS=Drosophila melanogaster OX=7227 GN=CG14896 PE=1 SV=1	-4.74092	-4.95669	-5.00997	-5.4366	-6.13268	-5.3519	-5.67616	-6.42797	0.861	0.019591	T535
R.NNS(phos)NGNFQPLPER.G	Q9VMW4	Rtnl1	Reticulon-like protein OS=Drosophila melanogaster OX=7227 GN=Rtnl1 PE=1 SV=1	11.0272	5.95449	5.23711	5.81475	10.5589	4.97385	4.34283	4.7183	0.86	0.650504	S14
K.GTTASNS(phos)FSFR.K	Q9V4P1	scra	Anillin OS=Drosophila melanogaster OX=7227 GN=scra PE=1 SV=3	-6.18331	-6.11937	-5.98607	-6.46436	-6.00189	-8.8807	-6.77422	-6.53535	0.86	0.191504	S715
K.STS(phos)DHLLLFPAR.G	A0A0H4Y1G5	hyd-RA	FI24602p1 OS=Drosophila melanogaster OX=7227 GN=hyd-RA PE=2 SV=1	-8.21218	-8.68191	-8.48779	-9.35948	-9.86268	-9.04018	-10.7419	-8.53232	0.859	0.135363	S2261
R.YSEGGVGPSGAPSS(phos)PSK.S	Q9VN82	cno	Canoe isoform E OS=Drosophila melanogaster OX=7227 GN=cno PE=1 SV=2	3.89475	4.31712	3.66445	2.91246	3.22706	2.95496	2.76641	2.40789	0.858	0.0379201	S1741
R.GS(phos)PAFVR.H	P46863	Klp61F	Kinesin-like protein Klp61F OS=Drosophila melanogaster OX=7227 GN=Klp61F PE=1 SV=2	-2.70039	-2.72459	-2.3752	-2.62507	-5.4559	-3.14402	-2.70872	-2.54398	0.857	0.216682	S1055
R.VPEEQTWEVPLLGDC(cam)GDS(phos)AR.N	Q8T0G1	ZnT41F	LD05335p OS=Drosophila melanogaster OX=7227 GN=ZnT41F PE=2 SV=1	-2.71125	-3.36539	-3.93414	-3.43111	-3.97328	-5.32202	-4.39965	-3.17581	0.857	0.119155	S95
R.RAGTAT(phos)PQPGNTS(phos)TPRPPSAGPQPPPPSTHSQTASSPLSPTR.H	P08928	Lam	Lamin Dm0 OS=Drosophila melanogaster OX=7227 GN=Lam PE=1 SV=4	-5.20367	-5.17017	-5.69358	-6.79016	-7.40552	-6.496	-6.51603	-5.86885	0.857	0.108149	T13,S20
R.SGS(phos)REDNLC(cam)DGSDR.S	M9NDX8	Spn	Spinophilin isoform I OS=Drosophila melanogaster OX=7227 GN=Spn PE=1 SV=1	-0.612071	-0.714702	-0.921389	-0.980893	-1.68232	-1.43046	-2.16059	-1.37812	0.856	0.0065082	S100
K.KADS(phos)AEAKLEK.R	A0A0B4LGB0	Gp150	Gp150 isoform E OS=Drosophila melanogaster OX=7227 GN=Gp150 PE=1 SV=1	-4.99832	-4.89922	-6.75903	-6.04135	-6.79779	-6.15144	-8.24082	-4.9277	0.855	0.294955	S783
S.EPSARNS(phos)LEEGLDK.L	E4NKG1	Capr	Caprin isoform B OS=Drosophila melanogaster OX=7227 GN=Capr PE=1 SV=1	-8.44742	-8.15347	-8.79004	-7.84057	-8.8115	-9.14788	-10.0319	-8.65776	0.854	0.0488836	S357
K.VES(phos)DPESDIKDDSM(ox)SNITGEK.S	Q9VCH1	eIF4G2	Eukaryotic translation initiation factor 4G2 isoform A OS=Drosophila melanogaster OX=7227 GN=eIF4G2 PE=1 SV=2	-4.08981	-4.04956	-4.55895	-3.81846	-4.94528	-4.65523	-6.00998	-4.31667	0.853	0.0616988	S935
R.DGNGN(d)GS(phos)GGGDADPTGGPTSPSLGDGVAGTGPNK.Q	M9MS14	moody	Moody isoform C OS=Drosophila melanogaster OX=7227 GN=moody PE=3 SV=1	-2.68962	-1.80497	-2.31997	-1.82388	-2.81597	-3.50046	-2.57642	-3.15425	0.852	0.0239902	S437
R.PST(phos)PTVVTHTHDEDYS(phos)EEEETPSGAESSTEAVR.D	Q7K571	CG6247	GH10029p OS=Drosophila melanogaster OX=7227 GN=CG6247 PE=2 SV=1	0.0492822	0.187569	0.726981	0.453405	-0.366662	-0.56155	-0.72133	-0.339355	0.852	0.00447999	T474,S487
R.SIEDVDSS(phos)PTASQEEQQKK.H	Q9VID9	BEST:LD19244	Uncharacterized protein isoform B OS=Drosophila melanogaster OX=7227 GN=BEST:LD19244 PE=1 SV=3	-2.48022	-2.5359	-2.68834	-2.41983	-2.68473	-3.74776	-2.13128	-4.96475	0.851	0.188427	S319
K.YVYPGDSS(phos)PTTR.E	Q6NNE1	CG31037	RH02355p OS=Drosophila melanogaster OX=7227 GN=CG31037 PE=2 SV=1	1.06174	1.68374	0.93588	2.16875	-0.838606	0.66009	1.04713	1.58073	0.85	0.168353	S318
K.AEQDDVS(phos)MC(cam)TSEEEPTTS(phos)AATSPKPQQPQIVHQNAR.L	Q0KHR5	RhoGAP15B	Rho GTPase activating protein at 15B isoform B OS=Drosophila melanogaster OX=7227 GN=RhoGAP15B PE=1 SV=1	-4.9564	-4.30115	-2.69837	-3.46454	-5.86438	-2.87641	-5.79616	-4.28353	0.85	0.320043	S623,S634
R.DSTS(phos)PTHELR.F	X2JIN0	CG3950	Uncharacterized protein isoform W OS=Drosophila melanogaster OX=7227 GN=CG3950 PE=1 SV=1	5.53454	3.3011	2.3426	2.83585	3.51656	2.36207	2.95246	1.78633	0.849	0.285723	S51
K.SSGGAGSGS(phos)GDS(phos)VKTPGSAK.K	P22058	D1	Chromosomal protein D1 OS=Drosophila melanogaster OX=7227 GN=D1 PE=1 SV=3	-4.52257	-4.06406	-4.38693	-5.18674	-5.48922	-5.72929	-5.65598	-4.67656	0.848	0.0387204	S110,S113
R.LRLPS(phos)S(phos)DNEPLAEPTTIK.A	A0A0B4LHZ6	Dmel\CG6051	Uncharacterized protein isoform D OS=Drosophila melanogaster OX=7227 GN=Dmel\CG6051 PE=4 SV=1	1.22007	-1.63295	0.118594	-0.25454	-0.941501	-3.66261	-0.0937618	0.758483	0.848	0.436654	S550,S551
R.DRS(phos)FS(phos)PSPR.Q	Q500Y6		SD07352p OS=Drosophila melanogaster OX=7227 PE=2 SV=1	0.988177	0.921323	0.861043	0.724628	0.128134	0.376716	0.862758	-1.26405	0.848	0.0934906	S657,S659
K.QGS(phos)PFYAEPADALR.Q	Q8MQW8	spri	Protein sprint OS=Drosophila melanogaster OX=7227 GN=spri PE=2 SV=3	-3.70435	-4.04956	-3.81372	-3.23403	-2.84804	-3.74115	-1.9721	-9.62621	0.846	0.609357	S1067
K.QLDLGQS(phos)DGEEVVDNLYEK.F	Q9VG61	Dmel\CG5961	LD45245p OS=Drosophila melanogaster OX=7227 GN=Dmel\CG5961 PE=2 SV=1	-4.56132	-2.07789	-0.582754	1.01313	-2.90311	-4.76149	-2.55291	0.624587	0.846	0.586203	S137
R.KVS(phos)LDEPR.K	D0IQL0	Caf1-105-RA	MIP13707p OS=Drosophila melanogaster OX=7227 GN=Caf1-105-RA PE=2 SV=1	-0.437473	-0.600195	-0.213945	-0.355474	0.391054	0.0115612	-0.0113468	-5.37926	0.845	0.524061	S425
R.SGS(phos)PDRDVAAPER.R	Q500Y6		SD07352p OS=Drosophila melanogaster OX=7227 PE=2 SV=1	-0.0871873	-0.679386	-0.678748	-0.831031	-1.12246	-0.866095	-0.772456	-2.89093	0.844	0.130986	S812
K.IVEDAVVSS(phos)PSES(phos)PR.T	M9MRJ4	Msp300	Muscle-specific protein 300 kDa isoform G OS=Drosophila melanogaster OX=7227 GN=Msp300 PE=1 SV=1	-4.05621	-3.65078	-3.81808	-3.5718	-4.47579	-6.1959	-3.79618	-3.99975	0.843	0.149567	S10675,S10679
R.SDTDSNVGLTEPLVFS(phos)DDEEEPKKSEGTTK.Q	B7Z0I8	CG14896	Uncharacterized protein OS=Drosophila melanogaster OX=7227 GN=CG14896 PE=1 SV=1	-5.62826	-5.82783	-6.43148	-5.53579	-5.40414	-5.44543	-5.78151	-10.1631	0.843	0.458257	S1148
R.SS(phos)LPATIPLYDGGR.N	A1Z9S6	Su(var)2-HP2	Su(Var)2-HP2 isoform A OS=Drosophila melanogaster OX=7227 GN=Su(var)2-HP2 PE=1 SV=1	-0.858203	-2.21952	-2.39953	-2.48505	-2.72386	-2.86739	-2.70008	-3.04111	0.843	0.0604883	S3047
R.EAT(phos)PPIISLS(phos)PQKKT(phos)PITKPLKK.N	Q9VID9	BEST:LD19244	Uncharacterized protein isoform B OS=Drosophila melanogaster OX=7227 GN=BEST:LD19244 PE=1 SV=3	-3.6079	-3.22434	-3.21273	-3.30461	-2.86981	-4.64903	-3.10483	-6.08841	0.841	0.266859	T975,S982,T987
I.PLSTYDAAPLLHSYDDS(phos)PQR.W	Q5KTT4	dNAT1	Uncharacterized protein dNAT1 (Fragment) OS=Drosophila melanogaster OX=7227 GN=dNAT1 PE=2 SV=1	-7.41427	-7.92099	-8.11259	-8.20235	-8.81826	-8.80161	-8.18579	-9.19885	0.839	0.0204932	S57
M.SGNDVSVTET(phos)AQSDQNLMHTK.E	Q9VUH1	ome	LD21715p OS=Drosophila melanogaster OX=7227 GN=ome PE=1 SV=1	-6.95416	-6.58619	-6.37893	-7.14029	-7.74863	-7.55798	-7.64526	-7.4591	0.838	0.00564889	T12
K.NSQDS(phos)DEVFEPAKPVK.K	Q24595	Xpc	DNA repair protein complementing XP-C cells homolog OS=Drosophila melanogaster OX=7227 GN=Xpc PE=1 SV=2	-3.87934	-2.51085	-2.31225	-2.86442	-6.87672	-2.88548	-2.23347	-2.91793	0.837	0.4396	S912
R.IYNLS(phos)SPPDR.K	Q9XZ34	Rif1	Telomere-associated protein RIF1 OS=Drosophila melanogaster OX=7227 GN=Rif1 PE=1 SV=1	-0.589368	-0.746025	-0.765686	-0.789243	-0.796288	-0.841603	-1.23846	-3.36096	0.837	0.184718	S959
M.S(ac)(phos)N(d)GGGAGGLGAARPPPR.I	C1C547	SC35-RB	MIP01221p OS=Drosophila melanogaster OX=7227 GN=SC35-RB PE=2 SV=1	-3.33354	-3.45492	-3.95082	-3.63808	-4.56534	-4.45551	-3.94736	-4.75227	0.836	0.00992232	S3
M.T(ac)DLRNEMDS(phos)DLDQNYSLNSNADPK.N	Q9VK90	Dmel\CG5446	GEO09660p1 OS=Drosophila melanogaster OX=7227 GN=Dmel\CG5446 PE=1 SV=1	-1.3662	-6.23494	-7.91259	-1.18251	-5.29995	-4.27534	-4.61322	-5.84103	0.833	0.615823	S11
R.GNS(phos)PVITQNGLK.N	Q86NM6	wts	SD19495p OS=Drosophila melanogaster OX=7227 GN=wts PE=2 SV=1	-2.06387	-4.1936	-2.61054	-2.31446	-2.99584	-5.28313	-2.88341	-3.34866	0.832	0.261554	S247
K.QVQTATS(phos)HGIAF.M	P04146	GIP	Copia protein OS=Drosophila melanogaster OX=7227 GN=GIP PE=1 SV=3	-8.26238	-8.04592	-8.4172	-8.78804	-8.69495	-9.80814	-9.24068	-9.09031	0.83	0.022651	S269
K.ERS(phos)PVNANDDALK.E	C3KGJ8	CG18190-RB	IP08151p OS=Drosophila melanogaster OX=7227 GN=CG18190-RB PE=2 SV=1	0.110654	-0.736315	-0.243004	-1.21771	-1.50998	-1.20924	-1.5055	-1.17724	0.829	0.0300826	S101
K.KNIADES(phos)KES(phos)IDNLEWAEN(d)LIAESEEQSNKEPK.S	Q24478	Cp190	Centrosome-associated zinc finger protein CP190 OS=Drosophila melanogaster OX=7227 GN=Cp190 PE=1 SV=2	-9.65752	-8.61702	-6.35336	-8.46567	-9.2677	-8.92792	-9.12522	-9.09031	0.829	0.239187	S758,S761
R.NRPDASDEDLGLPRS(phos)PAS(phos)PQRR.A	Q6AWS1	CG30015	SD19814p OS=Drosophila melanogaster OX=7227 GN=CG30015 PE=2 SV=1	-4.53794	-1.66024	-2.50998	-2.01707	-3.95222	-3.54291	-2.63281	-3.9103	0.828	0.249087	S340,S343
K.LNTT(phos)AGDSSNDEDSDEETASPGGESHDEPR.F	O76902	rush	Pleckstrin homology domain-containing family F member 1 homolog OS=Drosophila melanogaster OX=7227 GN=rush PE=1 SV=1	-5.30525	-5.03072	-4.99013	-4.94733	-6.00189	-5.86631	-5.93513	-5.78032	0.828	0.00123487	T240
R.S(phos)GSPDRDVAAPERR.R	Q500Y6		SD07352p OS=Drosophila melanogaster OX=7227 PE=2 SV=1	-1.88734	-2.75368	-2.71863	-3.74586	-3.43787	-3.04919	-2.59231	-5.33493	0.827	0.249723	S810
K.S(phos)PNATGIATTSK.S	M9NF18	FBXL5	Uncharacterized protein isoform D OS=Drosophila melanogaster OX=7227 GN=FBXL5 PE=1 SV=1	-1.26279	-1.4712	-1.63625	-1.5206	-3.64195	-1.51244	-1.8147	-2.22464	0.826	0.110755	S266
K.RISSS(phos)LHS(phos)STFQELYK.L	Q9VGI5	Lk6	Lk6 kinase isoform B OS=Drosophila melanogaster OX=7227 GN=Lk6 PE=1 SV=1	-4.10977	-2.04157	-2.45795	-2.08046	-3.8065	-3.01892	-4.39129	-2.77124	0.825	0.192113	S56,S59
K.LQAVEEDVAEPLVT(phos)PTKR.K	Q9VSD7	ldbr	Lariat debranching enzyme OS=Drosophila melanogaster OX=7227 GN=ldbr PE=2 SV=1	-3.8867	-5.07899	-4.17328	-4.59081	-10.5159	-3.98659	-2.86399	-3.65736	0.824	0.628199	T462
R.FKS(phos)PAHS(phos)PEAPPK.K	Q960C4	CG7971	SD07741p OS=Drosophila melanogaster OX=7227 GN=CG7971 PE=2 SV=1	0.178367	0.516802	0.414478	-0.124509	-1.59812	-0.624732	-0.107967	0.0360511	0.82	0.0693952	S677,S681
K.ASS(phos)ETS(phos)SEIKDEK.E	Q94517	Rpd3	Histone deacetylase Rpd3 OS=Drosophila melanogaster OX=7227 GN=Rpd3 PE=1 SV=2	-5.78452	-5.23433	-7.03989	-5.444	-5.44279	-8.41354	-4.92304	-7.99906	0.819	0.388358	S456,S459
R.SS(phos)ADASTLNLSTGSESGAEERNE	M9NEL3	kis	Kismet isoform F OS=Drosophila melanogaster OX=7227 GN=kis PE=1 SV=1	-0.201129	-1.5329	-4.58476	-4.38472	-1.80807	-1.52302	-5.41087	-5.23198	0.818	0.571303	S5171
K.LDPDDGDS(phos)DADESR.D	A8WHK9		Nipped-B protein OS=Drosophila melanogaster OX=7227 PE=2 SV=1	-2.18723	-2.35412	-1.85994	-3.02144	-2.83727	-3.23388	-4.00362	-2.61583	0.817	0.0676246	S1963
R.NSS(phos)TSEKDELSSNSSSSGGC(cam)GGNKR.S	Q7KSV7	Dmel\CG9636	Uncharacterized protein isoform D OS=Drosophila melanogaster OX=7227 GN=Dmel\CG9636 PE=4 SV=2	-0.139365	1.13478	0.4028	0.336929	-0.364728	-0.227121	-0.331407	-0.605786	0.816	0.0233158	S116
R.KSGADGQEQ(d)LS(phos)PTSQQK.K	A0A0B4LG23	cora	Coracle isoform G OS=Drosophila melanogaster OX=7227 GN=cora PE=1 SV=1	-3.66584	-4.13629	-5.23668	-5.00083	-9.25217	-4.19868	-3.81843	-4.0328	0.816	0.532262	S598
R.KDS(phos)VDSNHSVVK.V	Q9VUE5	stwl	LD17962p OS=Drosophila melanogaster OX=7227 GN=stwl PE=1 SV=1	-2.56627	-2.65891	-2.70846	-2.6146	-3.00787	-2.95066	-4.43074	-3.42406	0.816	0.0467252	S773
K.SPTIT(phos)S(phos)PDKETPAPLPVDTPKK.S	Q8SWW4	anon-WO0140519.52	LD28380p OS=Drosophila melanogaster OX=7227 GN=anon-WO0140519.52 PE=1 SV=1	-0.637722	-1.84615	-1.76731	-1.35467	-2.74382	-2.80579	-0.907562	-2.40383	0.814	0.142601	T1020,S1021
K.VM(ox)NKEDDS(phos)EDEEFGGIFKK.R	Q9VTU0	CG5645	Protein KRI1 homolog OS=Drosophila melanogaster OX=7227 GN=CG5645 PE=1 SV=1	-3.02656	-3.60235	-3.91764	-3.69868	-3.78152	-7.43563	-3.64601	-2.63064	0.812	0.433994	S180
R.QKS(phos)QIDEGVLK.S	Q9VBY8	stac	Protein unc-13 homolog 4B OS=Drosophila melanogaster OX=7227 GN=stac PE=1 SV=5	-5.38642	-5.33625	-5.60792	-5.24365	-6.34808	-5.66537	-5.65598	-7.15344	0.812	0.0559814	S49
R.HSGS(phos)DDNEKGDDAGSGSGSSETEVVTK.N	Q9VPB8	Pex14	Peroxin 14 OS=Drosophila melanogaster OX=7227 GN=Pex14 PE=1 SV=1	-2.58611	-1.19367	-1.59351	-2.6677	-2.89192	-3.16597	-2.89322	-2.33552	0.811	0.0762077	S249
K.NPS(phos)GISIC(cam)TRPAEENVGR.N	M9NCX1	l(2)gl	Lethal (2) giant larvae isoform G OS=Drosophila melanogaster OX=7227 GN=l(2)gl PE=4 SV=1	-8.04032	-7.75494	-8.88212	-8.0502	-9.59812	-10.4274	-8.1365	-7.80382	0.81	0.23001	S1014
R.GS(phos)PNMQMR.S	A1ZBL7	par-1	Par-1 isoform H OS=Drosophila melanogaster OX=7227 GN=par-1 PE=1 SV=1	6.22111	5.01865	4.8207	3.53607	3.59317	4.78568	4.52071	3.45896	0.81	0.216863	S354
R.LIDAGSNELTATSS(phos)PVK.A	F6J365	CG11427	CG11427 (Fragment) OS=Drosophila melanogaster OX=7227 GN=CG11427 PE=4 SV=1	0.892854	0.750563	1.16054	1.28871	0.234019	0.162284	0.267048	0.191468	0.809	0.00243754	S183
M(ac)DVSASTSFES(phos)SPDKR.N	Q9VG01	Dmel\CG46280	RE12073p OS=Drosophila melanogaster OX=7227 GN=Dmel\CG46280 PE=1 SV=1	-5.21599	-5.64957	-3.6452	-3.43847	-8.53609	-3.98269	-4.18447	-4.47871	0.808	0.491183	S12
R.KLNNTDSS(phos)LEGSGLNDSMDLEDLEEDLPSHTVK.R	Q8T9D1	Chro	SD06626p OS=Drosophila melanogaster OX=7227 GN=Chro PE=2 SV=1	-6.32282	-6.77051	-6.78957	-6.5575	-6.76151	-7.48113	-7.20527	-8.22492	0.808	0.0412502	S381
K.NNS(phos)S(phos)LDDDDDEEWER.L	Q9VS57	Sec63	RE14391p OS=Drosophila melanogaster OX=7227 GN=Sec63 PE=1 SV=1	-9.65517	-6.39684	-5.71785	-5.57582	-7.0058	-6.67324	-9.28131	-7.61764	0.808	0.455311	S600,S601
R.SGS(phos)LGN(d)KPQ(d)VANR.N	A0A0B4K7Y7	larp	La related protein isoform G OS=Drosophila melanogaster OX=7227 GN=larp PE=1 SV=1	-7.51412	-6.79772	-7.29834	-7.43209	-8.11819	-7.93224	-8.15148	-8.06834	0.807	0.0052669	S1588
M.S(ac)(phos)HHS(phos)DDQLLQ(d)AGSDSFWEPGNYKR.T	A0A0B4KH28	Synd	Syndapin isoform C OS=Drosophila melanogaster OX=7227 GN=Synd PE=1 SV=1	-0.810745	0.633739	-3.51014	2.25331	0.921393	-3.18825	-0.107967	-2.28779	0.807	0.584919	S3,S6
K.ELANKFESS(phos)PVEQLPNFDFSVR.G	M9PDR8	CdGAPr	Cd GTPase activating protein-related isoform D OS=Drosophila melanogaster OX=7227 GN=CdGAPr PE=1 SV=1	-0.435223	-1.70215	-1.20251	-0.874066	-4.82554	-0.714872	-0.251966	-1.64501	0.806	0.435324	S1487
R.RRS(phos)PPLPPPSSSAMEK.R	A1ZBT6	anon-WO0118547.91	Uncharacterized protein isoform C OS=Drosophila melanogaster OX=7227 GN=anon-WO0118547.91 PE=1 SV=1	-4.36688	-5.13403	-4.2479	-5.03391	-3.6857	-4.25873	-10.0697	-3.99016	0.805	0.584736	S185
K.KPEDPSSEAEALC(cam)S(phos)PAK.R	Q9I7K6	CG8223	Protein NASP homolog OS=Drosophila melanogaster OX=7227 GN=CG8223 PE=1 SV=1	-5.50983	-5.3719	-4.58849	-5.00629	-6.25344	-5.78254	-6.41085	-5.25016	0.805	0.0446091	S486
R.S(phos)LDSALQR.I	Q9BKJ2	fwd	Four wheel drive isoform C OS=Drosophila melanogaster OX=7227 GN=fwd PE=2 SV=2	-3.56003	-3.60059	-3.26244	-3.35598	-5.73885	-4.17401	-4.18206	-2.89988	0.804	0.185724	S27
K.SSEQYNPGS(phos)PTSES(phos)NDAQPSEKK.L	Q7KRW8	CG1646	Pre-mRNA-processing factor 39 OS=Drosophila melanogaster OX=7227 GN=CG1646 PE=1 SV=1	-6.18331	-5.68649	-6.67584	-6.72388	-7.51108	-8.20286	-6.73418	-6.03227	0.803	0.151062	S309,S314
K.ALQAVYPDYVDELSLYGS(phos)K.N	A0A0B4KHJ5	GlyS	Glycogen [starch] synthase OS=Drosophila melanogaster OX=7227 GN=GlyS PE=1 SV=1	-5.17936	-6.33691	-5.81051	-6.0081	-5.98278	-6.38888	-6.81093	-7.36101	0.802	0.0675141	S641
R.SES(phos)QSAALR.A	A0A0B4KG56	PEK	Pancreatic eIF-2alpha kinase isoform C OS=Drosophila melanogaster OX=7227 GN=PEK PE=4 SV=1	-2.42558	-2.76351	-2.56396	-2.9021	-3.39936	-3.6673	-3.4222	-3.37336	0.802	0.00259867	S743
R.DVS(phos)FSEASSK.C	A0A0B4LF82	Sin3A	Sin3A isoform H OS=Drosophila melanogaster OX=7227 GN=Sin3A PE=1 SV=1	-5.73939	-6.56403	-6.71602	-7.09072	-7.00194	-7.87617	-6.72574	-7.71529	0.802	0.0749122	S910
R.ERT(phos)PPPLTASQS(phos)TSDLGHDVDMS(phos)PPKR.A	Q8SX89	kuk	Kugelkern isoform A OS=Drosophila melanogaster OX=7227 GN=kuk PE=1 SV=1	-2.76677	-2.50259	-2.63922	-2.80373	-3.10783	-3.39302	-3.62462	-3.79571	0.802	0.00510174	T419,S428,S439
R.SS(phos)QVLQR.L	Q9VRG8	Dmel\CG1486	GH01474p OS=Drosophila melanogaster OX=7227 GN=Dmel\CG1486 PE=1 SV=1	-4.32627	-6.23494	-4.8141	-6.15807	-6.52475	-6.47393	-5.24597	-6.49143	0.801	0.178929	S51
K.SLNGEDSGGIDKEPES(phos)EEEARPMGFGFK.A	A1ZBW6	Dmel\CG11180	Uncharacterized protein isoform A OS=Drosophila melanogaster OX=7227 GN=Dmel\CG11180 PE=1 SV=1	-0.358574	2.23033	0.4028	1.85253	1.7928	-1.94341	0.321064	0.758483	0.8	0.409817	S105
R.TGS(phos)SNSSASQQDNNSFFEDNFFNR.K	Q7K0X9	Syx7	LD23667p OS=Drosophila melanogaster OX=7227 GN=Syx7 PE=1 SV=1	-4.80924	-5.15457	-4.93219	-4.86069	-5.3978	-5.27834	-6.19169	-6.08841	0.8	0.0177634	S148
K.RIVSQHTSSSRLS(phos)R.R	P08928	Lam	Lamin Dm0 OS=Drosophila melanogaster OX=7227 GN=Lam PE=1 SV=4	-10.0759	-9.4828	-10.2113	-9.4525	-10.8557	-11.0219	-10.3502	-10.1932	0.8	0.0267183	S592
M.S(ac)ALGDS(phos)DDETEFK.E	Q8SYR5	BcDNA:RE39515	GEO07715p1 OS=Drosophila melanogaster OX=7227 GN=BcDNA:RE39515 PE=1 SV=1	-0.404073	-1.22728	-0.966115	-1.16714	-1.52287	-1.89221	-1.99304	-1.55751	0.8	0.0127749	S8
R.ERPLRT(phos)PSPT(phos)M(ox)PC(cam)PNPLISEIPKDREDMDNSTSQK.T	X2JG22	prp4	Uncharacterized protein isoform D OS=Drosophila melanogaster OX=7227 GN=prp4 PE=1 SV=1	-2.27307	-4.42984	-4.94645	-3.70755	-2.75391	-2.46925	-10.2221	-3.11207	0.8	0.666047	T494,T498
W.RTSARPQS(phos)IDT(phos)SPTR.R	Q7PLL3	eIF4B	Eukaryotic initiation factor 4B OS=Drosophila melanogaster OX=7227 GN=eIF4B PE=1 SV=1	-6.92759	-6.37257	-6.10908	-3.31813	-8.08929	-3.43238	-7.58552	-6.81492	0.799	0.529321	S234,T237
K.KEAS(phos)PVSMAS(phos)PAKDELTQEINAQGEK.V	P28668	GluProRS	Bifunctional glutamate/proline--tRNA ligase OS=Drosophila melanogaster OX=7227 GN=GluProRS PE=1 SV=2	-7.36408	-7.13268	-8.00913	-7.36601	-8.34829	-8.13549	-8.38393	-8.1894	0.796	0.00919804	S1111,S1117
K.S(phos)PIIFNR.R	Q500Y6		SD07352p OS=Drosophila melanogaster OX=7227 PE=2 SV=1	-0.80783	-1.27921	-0.706306	-1.16332	-1.14884	-1.44381	-1.32874	-3.21992	0.796	0.136415	S271
K.MDVDEEDS(phos)AAPK.T	C7LAA5	CG30122-RB	GM15464p OS=Drosophila melanogaster OX=7227 GN=CG30122-RB PE=2 SV=1	-1.60843	-2.33935	-1.55657	-2.32295	-10.3794	-0.0381715	0.46236	-1.05485	0.796	0.743264	S50
K.RRS(phos)GS(phos)PDRDVAAPER.R	Q500Y6		SD07352p OS=Drosophila melanogaster OX=7227 PE=2 SV=1	0.539325	-0.0250181	-0.283941	0.104927	-0.351263	-0.552487	0.164411	-2.11126	0.796	0.147394	S810,S812
K.QQS(phos)N(d)GLGK.N	P23226	Map205	205 kDa microtubule-associated protein OS=Drosophila melanogaster OX=7227 GN=Map205 PE=1 SV=2	-6.28341	-6.12951	-5.70162	-5.57582	-6.88203	-6.8048	-6.83643	-6.34748	0.795	0.0110748	S1021
R.SNISFATSPGGSS(phos)PHELNR.S	Q9VWS2	Nup35	Nucleoporin Nup35 OS=Drosophila melanogaster OX=7227 GN=Nup35 PE=1 SV=1	-3.67219	-3.95644	-3.68054	-3.96762	-4.38832	-5.85914	-4.26878	-3.9395	0.795	0.0969292	S59
R.QDS(phos)DSRLPTNFER.G	Q9W002	msn	Misshapen isoform A OS=Drosophila melanogaster OX=7227 GN=msn PE=1 SV=3	-9.23982	-8.45601	-9.15508	-9.35279	-9.54562	-10.3725	-9.94445	-9.51183	0.793	0.0296696	S800
R.DLPQLS(phos)DTENT(phos)SPAIVAR.R	Q9VZZ9	dos	Protein daughter of sevenless OS=Drosophila melanogaster OX=7227 GN=dos PE=1 SV=1	-1.42752	-0.726669	-0.678748	-0.375211	-0.171479	-0.0130908	-5.94326	-0.248037	0.792	0.572313	S514,T519
M.S(ac)(phos)QKTERPVLSGQR.I	Q9VNE2	kra	Protein krasavietz OS=Drosophila melanogaster OX=7227 GN=kra PE=1 SV=1	-6.91549	-6.8042	-7.35813	-7.4648	-8.23996	-7.61964	-7.78727	-8.05869	0.791	0.0119578	S3
R.KPGIGS(phos)PTNC(cam)DPGS(phos)PSIR.D	Q7KNQ9	cnk	Connector enhancer of KSR protein CNK OS=Drosophila melanogaster OX=7227 GN=cnk PE=1 SV=1	-3.7551	-2.75368	-2.50998	-2.86442	-2.94873	-3.35471	-3.79802	-4.94611	0.791	0.143721	S433,S441
R.IHGRPTT(phos)PPPVR.G	A1ZBT6	anon-WO0118547.91	Uncharacterized protein isoform C OS=Drosophila melanogaster OX=7227 GN=anon-WO0118547.91 PE=1 SV=1	-3.46513	-3.54698	-3.37695	-4.08405	-4.62705	-4.59742	-5.28159	-3.13301	0.791	0.125967	T286
R.S(phos)PYGDSSNVK.Q	Q24478	Cp190	Centrosome-associated zinc finger protein CP190 OS=Drosophila melanogaster OX=7227 GN=Cp190 PE=1 SV=2	-8.80097	-8.67596	-8.32981	-10.584	-10.516	-9.76987	-9.47604	-9.78431	0.789	0.17116	S198
K.AHGS(phos)EDEQVAEK.E	Q9VQK7	Sf3b2	LD45152p OS=Drosophila melanogaster OX=7227 GN=Sf3b2 PE=1 SV=2	-1.08289	1.01772	-0.999819	-1.27013	-1.06167	-1.47772	-1.92607	-1.02275	0.788	0.187372	S177
R.SEASQQS(phos)PTPVPK.K	Q9W4Z1	EG:BACH48C10.5	EG:BACH48C10.5 protein OS=Drosophila melanogaster OX=7227 GN=EG:BACH48C10.5 PE=1 SV=2	-2.62663	-2.39174	-2.70846	-2.6895	-3.62889	-3.38014	-3.33943	-3.21992	0.788	0.00228039	S734
K.ELS(phos)PELEMPPALPPK.N	X2JIR4	C3G	C3G guanyl-nucleotide exchange factor isoform L OS=Drosophila melanogaster OX=7227 GN=C3G PE=4 SV=1	-2.34731	-3.9976	-1.79933	-2.0102	-1.76662	-0.674987	-1.18027	-9.68538	0.788	0.703718	S770
R.GIDNSFGS(phos)PDVHNNSSAYEDAEDDFYSHAAFSANR.S	A0A0B4K7J2	Nup358	E3 SUMO-protein ligase RanBP2 OS=Drosophila melanogaster OX=7227 GN=Nup358 PE=1 SV=1	-8.91679	-8.03446	-8.64026	-9.11617	-9.00919	-8.86913	-10.0347	-9.94709	0.788	0.072995	S811
M.S(ac)TLNRPKS(phos)PHT(phos)PTAIKK.G	Q9VWD0	parvin	GH23568p OS=Drosophila melanogaster OX=7227 GN=parvin PE=1 SV=2	-4.32294	-4.7668	-5.19633	-5.60039	-6.88912	-5.06124	-4.61972	-6.45936	0.786	0.20932	S10,T13
R.AIPLPLPSEKS(phos)PQKDS(phos)RS(phos)R.S	Q9U1K6	EG:67A9.2	EG:67A9.2 protein OS=Drosophila melanogaster OX=7227 GN=EG:67A9.2 PE=3 SV=1	-3.89906	-3.90332	-2.45795	-2.92778	-6.44937	-3.28101	-3.43647	-3.16499	0.786	0.358279	S389,S394,S396
R.Q(d)(ac)LFGS(phos)PR.S	Q9VS50	eco	N-acetyltransferase eco OS=Drosophila melanogaster OX=7227 GN=eco PE=1 SV=1	4.58395	5.21911	5.09012	5.03066	4.58065	3.90974	3.75462	4.53864	0.785	0.021212	S29
R.NRDNEDLESIAS(phos)SNQSK.Q	Q9VYW4	Dmel\CG1703	LD04461p OS=Drosophila melanogaster OX=7227 GN=Dmel\CG1703 PE=1 SV=1	-3.91653	-4.39581	-4.30804	-4.49173	-5.10656	-5.54545	-5.00574	-4.59588	0.785	0.0161047	S67
R.QEIDS(phos)PNAGATVK.K	E1JIK0	Hrb87F	Heterogeneous nuclear ribonucleoprotein at 87F isoform C OS=Drosophila melanogaster OX=7227 GN=Hrb87F PE=1 SV=1	-7.7373	-7.41299	-7.83621	-7.9374	-8.70745	-8.4912	-8.64517	-8.21775	0.784	0.00513509	S108
R.NDDDDDRPS(phos)PPEEPAAGPR.D	P12881	Prosalpha6	Proteasome subunit alpha type-1 OS=Drosophila melanogaster OX=7227 GN=Prosalpha6 PE=1 SV=1	-8.01858	-7.49184	-7.07082	-7.81351	-8.34829	-8.45185	-8.76683	-7.96563	0.784	0.0243353	S258
R.SHASTVDS(phos)S(phos)DEEKKSTLSK.R	M9NF67	nbs	Nibrin OS=Drosophila melanogaster OX=7227 GN=nbs PE=1 SV=1	-1.00071	0.724431	-0.59441	-0.831031	-1.97504	-1.73631	-0.433254	-0.69441	0.784	0.169686	S391,S392
R.S(phos)VS(phos)PTPLDAKPLDR.N	Q9Y095	XRCC1	FI04011p OS=Drosophila melanogaster OX=7227 GN=XRCC1 PE=1 SV=1	-1.83299	-3.53852	-2.50998	-2.86442	-2.57334	-4.22149	-3.88732	-3.19769	0.783	0.147975	S251,S253
R.S(phos)RSQSEQPATC(cam)PIC(cam)YAVIR.Q	A4V1Y7	Trl	Trithorax-like isoform C OS=Drosophila melanogaster OX=7227 GN=Trl PE=1 SV=1	-2.66832	-2.75368	-2.80267	-2.81566	-3.56711	-3.70375	-3.4222	-3.4766	0.782	0.00117367	S336
R.RPQDDASIGNSDNLEAISEAAHSVAS(phos)S(phos)LDLEEQQER.D	Q9VZ08	CG1657	Receptor-mediated endocytosis protein 6 homolog OS=Drosophila melanogaster OX=7227 GN=CG1657 PE=1 SV=2	-3.947	-2.99863	-2.34338	0.526138	-1.43909	-3.16597	-3.18689	-4.09922	0.782	0.467084	S646,S647
K.S(phos)PANQDTLAVNKS(phos)PAK.T	A0A0B4LGG6	Lpt	Lost PHDs of trr isoform B OS=Drosophila melanogaster OX=7227 GN=Lpt PE=1 SV=1	-2.07785	-0.765644	-0.297213	-0.0450777	-1.00635	-0.888727	-1.09291	-3.32438	0.782	0.289689	S962,S974
R.LNEC(cam)LQVNPDTAAQGDQEST(phos)PEGQGNR.T	Q9VAJ1	Cap-D2	Condensin complex subunit 1 OS=Drosophila melanogaster OX=7227 GN=Cap-D2 PE=1 SV=1	-4.60518	-4.27561	-4.13465	-3.16981	-6.72136	-4.40766	-4.3556	-3.82778	0.782	0.275608	T1329
M.S(ac)IQNLNT(phos)RDPFADAIK.G	Q9VZS3	eIF1	Eukaryotic translation initiation factor eIF1 OS=Drosophila melanogaster OX=7227 GN=eIF1 PE=1 SV=1	-8.98258	-8.8839	-8.78319	-9.30355	-9.56454	-10.5775	-10.1533	-8.78451	0.782	0.085105	T9
R.QDTPPAAGEDSAGNAS(phos)PTR.L	A1ZBE8	CG15099	Protein dopey-1 homolog OS=Drosophila melanogaster OX=7227 GN=CG15099 PE=1 SV=1	-1.67062	-1.94894	-1.85994	-1.93016	-2.75391	-3.58516	-2.22107	-1.97273	0.781	0.0633426	S1758
R.AAGGRPS(phos)TPIQSDSELETTMR.D	E5DK16	Lpin	Lipin isoform J OS=Drosophila melanogaster OX=7227 GN=Lpin PE=1 SV=1	-4.25149	-4.4551	-4.44652	-4.71945	-6.08096	-5.06124	-4.92304	-4.92405	0.779	0.035254	S331
K.DQS(phos)EHDEL	P29413	Calr	Calreticulin OS=Drosophila melanogaster OX=7227 GN=Calr PE=1 SV=2	-8.57482	-8.22554	-8.67786	-8.81846	-9.2677	-9.52059	-9.38377	-9.24214	0.779	0.00403281	S402
R.DFS(phos)PVIGQNVGR.G	D0IQK1	CG5798-RA	RH33842p OS=Drosophila melanogaster OX=7227 GN=CG5798-RA PE=2 SV=1	-1.432	-0.846903	-0.49712	-0.556117	-1.04609	-2.00636	-0.382295	-3.01174	0.779	0.21455	S552
M(ac)DTEKS(phos)SSSS(phos)FEDLTNAEDTKDIR.K	Q7K3D4	zda	Peptidylprolyl isomerase OS=Drosophila melanogaster OX=7227 GN=zda PE=1 SV=1	-6.38402	-5.49749	-6.47219	-5.42925	-5.67611	-9.91049	-5.45087	-5.86184	0.779	0.464523	S7,S11
K.EEMLSC(cam)SFNS(phos)PN(d)GKR	Q960Z0	Klp10A	Kinesin-like protein Klp10A OS=Drosophila melanogaster OX=7227 GN=Klp10A PE=1 SV=1	-3.04018	-3.3744	-3.03704	-3.09226	-4.42654	-4.86898	-3.2485	-3.11207	0.778	0.107446	S801
R.NATTS(phos)PR.K	Q9VX35	CC4	LD36501p OS=Drosophila melanogaster OX=7227 GN=CC4 PE=1 SV=1	-5.92906	-9.5922	-5.81051	-6.38254	-6.61309	-8.50905	-7.21902	-8.48419	0.778	0.429797	S88
R.QVS(phos)IES(phos)PGPGAK.N	Q0E9G4	Drat	CG1600-PA OS=Drosophila melanogaster OX=7227 GN=Drat PE=1 SV=1	-2.83635	-3.05787	-3.29098	-3.27135	-4.26777	-3.72314	-3.40807	-4.16669	0.777	0.0156069	S10,S13
R.NNS(phos)VTQADYTK.L	A0A0B4K6Y7	pyd	Polychaetoid isoform O OS=Drosophila melanogaster OX=7227 GN=pyd PE=1 SV=1	-3.99658	-3.32117	-3.56229	-3.83537	-4.53023	-3.96912	-4.84102	-4.48139	0.777	0.0173863	S1518
K.EEPAEEEAEVKS(phos)EK.K	Q9VM69	nop5	CG10206-PA OS=Drosophila melanogaster OX=7227 GN=nop5 PE=1 SV=2	-6.3497	-5.84442	-5.98607	-6.63999	-7.47592	-5.87351	-7.28154	-7.29914	0.777	0.0914018	S469
R.RAGS(phos)NDR.A	Q9VHC0	RnpS1	LD23870p OS=Drosophila melanogaster OX=7227 GN=RnpS1 PE=1 SV=2	-5.81229	-5.43333	-5.51993	-6.15807	-6.86793	-6.37859	-6.56536	-6.2166	0.776	0.0134455	S163
R.RFDGFGNN(d)GDNRDS(phos)GNWR.R	Q7PLL3	eIF4B	Eukaryotic initiation factor 4B OS=Drosophila melanogaster OX=7227 GN=eIF4B PE=1 SV=1	-9.10547	-9.08847	-8.00116	-8.6517	-9.85432	-10.0316	-8.56272	-9.50047	0.776	0.0943641	S183
K.TDGIQAEEVDMS(phos)QETR.D	A0A0B4LGB0	Gp150	Gp150 isoform E OS=Drosophila melanogaster OX=7227 GN=Gp150 PE=1 SV=1	-1.80366	-1.98298	-2.72887	-1.95635	-2.02303	-1.91991	-5.93513	-1.69861	0.776	0.440513	S926
K.TT(phos)PLT(phos)PK.Q	A1Z6I7	BubR1	Bub1-related kinase OS=Drosophila melanogaster OX=7227 GN=BubR1 PE=1 SV=1	-2.93466	-3.18418	-2.84659	-2.86442	-3.81492	-3.91051	-3.40807	-3.80073	0.776	0.00372641	T1082,T1085
R.NRS(phos)QLETTQNTLNSAQEK.L	A0A0B4KEE4	koi	Klaroid isoform A OS=Drosophila melanogaster OX=7227 GN=koi PE=1 SV=1	-4.16242	-4.42359	-4.19583	-5.20546	-4.31479	-6.32823	-5.93513	-4.50849	0.775	0.183305	S120
M(ac)ENNEAPS(phos)PSGS(phos)NNNENNNAAQKK.L	H1UUB1	Syb	GEO12465p1 OS=Drosophila melanogaster OX=7227 GN=Syb PE=1 SV=1	-7.45164	-5.37792	-7.32295	-6.97269	-8.81826	-7.9781	-5.77424	-7.65591	0.775	0.328623	S9,S13
R.QESSN(d)GGT(phos)PVINK.N	B5RJ67	Jupiter-RD	FI07631p (Fragment) OS=Drosophila melanogaster OX=7227 GN=Jupiter-RD PE=2 SV=1	-8.59398	-8.85536	-8.67786	-9.27585	-10.1459	-9.73166	-9.41057	-9.21332	0.775	0.0226239	T213
K.IIIKNDT(phos)DEDDEMHGS(phos)PK.K	Q500Y6		SD07352p OS=Drosophila melanogaster OX=7227 PE=2 SV=1	0.819345	0.556843	0.599779	0.650648	0.447175	0.450694	0.46236	-1.83345	0.775	0.192557	T698,S707
K.SS(phos)PSLDDS(phos)SHEELTLDEIKK.I	Q7YU03	Dmel\CG3632	LD11744p OS=Drosophila melanogaster OX=7227 GN=Dmel\CG3632 PE=1 SV=1	-3.8194	-2.98707	-2.82446	-2.65692	-4.80022	-4.05047	-4.41653	-2.11646	0.774	0.240791	S361,S367
R.S(ac)(phos)N(d)SDGLSTDYAHSLPK.K	Q4V5X3	CG14184	IP06477p (Fragment) OS=Drosophila melanogaster OX=7227 GN=CG14184 PE=2 SV=1	-4.85664	-4.79475	-4.49464	-4.55036	-5.03101	-5.57451	-5.80354	-5.38427	0.774	0.00877824	S48
R.S(ac)N(d)S(phos)DGLSTDYAHSLPK.K	Q4V5X3	CG14184	IP06477p (Fragment) OS=Drosophila melanogaster OX=7227 GN=CG14184 PE=2 SV=1	-4.85664	-4.79475	-4.49464	-4.55036	-5.03101	-5.57451	-5.80354	-5.38427	0.774	0.00877824	S50
R.GMEDDS(phos)S(phos)DEDKLQQK.L	C5WLN0	CG2691-RA	RE72321p (Fragment) OS=Drosophila melanogaster OX=7227 GN=CG2691-RA PE=2 SV=1	-0.736808	-0.00447677	0.174608	0.0729148	-1.13889	-0.710833	-0.514181	-1.22139	0.773	0.0269581	S1284,S1285
K.GKNNS(phos)S(phos)LDDDDDEEWER.L	Q9VS57	Sec63	RE14391p OS=Drosophila melanogaster OX=7227 GN=Sec63 PE=1 SV=1	-10.7949	-6.51009	-6.26725	-6.25876	-8.11819	-6.97723	-9.35747	-8.47134	0.773	0.509287	S600,S601
D.KQAETEMS(phos)DEDKPSEIKSPS(phos)TIK.K	Q8INM3	sle	Protein slender lobes OS=Drosophila melanogaster OX=7227 GN=sle PE=1 SV=1	-9.63802	-9.40551	-2.29693	-9.3417	-9.14367	-8.70591	-8.24886	-7.67053	0.772	0.655256	S947,S959
R.YEDPFSIKDPFAEEGEEELS(phos)EGK.G	Q8MMD2	Eps-15	Epidermal growth factor receptor pathway substrate clone 15 isoform B OS=Drosophila melanogaster OX=7227 GN=Eps-15 PE=1 SV=1	-3.45232	-4.3806	-3.18427	-4.04982	-3.33433	-5.14159	-4.31285	-5.36433	0.772	0.16913	S989
R.S(phos)PNKQQS(phos)N(d)GLGK.N	P23226	Map205	205 kDa microtubule-associated protein OS=Drosophila melanogaster OX=7227 GN=Map205 PE=1 SV=2	-6.93775	-8.94451	-6.19733	-6.61308	-8.38796	-7.89952	-8.08523	-7.40311	0.771	0.238602	S1015,S1021
K.SKLEDKEEKPLDGST(phos)EEK.A	A0A0B4LFV9	MESR4	Misexpression suppressor of ras 4 isoform C OS=Drosophila melanogaster OX=7227 GN=MESR4 PE=1 SV=1	0.701543	-0.290333	-0.773615	-0.268827	-0.123274	-1.25556	-1.1157	-1.22139	0.771	0.0919983	T1515
K.AST(phos)PEKETTPQS(phos)PGQPK.S	Q9VBI4	Exo84	Exocyst 84 isoform A OS=Drosophila melanogaster OX=7227 GN=Exo84 PE=1 SV=1	-2.33048	-2.1278	-2.07823	-2.13924	-3.16054	-1.28527	-4.66269	-2.65314	0.771	0.272598	T263,S272
R.S(phos)SERELADSGAK.K	M9PE93	ens	Ensconsin isoform K OS=Drosophila melanogaster OX=7227 GN=ens PE=1 SV=1	-6.22004	-5.31297	-6.29133	-6.76217	-10.2664	-5.19024	-6.06213	-6.14681	0.77	0.497275	S181
R.N(d)GHQHN(d)GS(phos)ISSGTLQK.Q	Q9VUC6	Frl	Formin-like protein OS=Drosophila melanogaster OX=7227 GN=Frl PE=1 SV=3	-5.98065	-7.96386	-6.36609	-7.01611	-8.60455	-8.18124	-6.93348	-6.68806	0.77	0.23524	S42
R.SRS(phos)FEQRPTSGVC(cam)AK.E	X2JEN2	l(1)G0196	Inositol hexakisphosphate and diphosphoinositol-pentakisphosphate kinase OS=Drosophila melanogaster OX=7227 GN=l(1)G0196 PE=1 SV=1	-6.55961	-5.77916	-5.89102	-5.97559	-6.37274	-7.10538	-7.26718	-6.53535	0.769	0.0307012	S1077
K.ASSES(phos)EDEEKAPQRPVFITTR.E	Q9W261	Rtf1	RNA polymerase-associated protein Rtf1 OS=Drosophila melanogaster OX=7227 GN=Rtf1 PE=1 SV=1	-6.67725	-5.09379	-4.68089	-5.6594	-5.69154	-4.77829	-5.251	-9.46725	0.769	0.490522	S416
R.RPVGRPS(phos)AGS(phos)VNLNIS(phos)R.T	P22058	D1	Chromosomal protein D1 OS=Drosophila melanogaster OX=7227 GN=D1 PE=1 SV=3	-6.44503	-6.03125	-6.29133	-6.61141	-7.47859	-6.73752	-7.0853	-7.14832	0.768	0.0105802	S162,S165,S171
R.SDST(phos)ITLSSTNNEVLPISNPNASMK.K	Q9VZS7	hob	Uncharacterized protein isoform B OS=Drosophila melanogaster OX=7227 GN=hob PE=1 SV=2	-3.99128	-4.245	-4.76269	-6.66396	-5.62337	-5.92498	-4.38298	-6.80414	0.768	0.323844	T1565
K.LKS(phos)VTGAQDGVGGGDAAATADNR.T	Q9VQ76	tho2	LD36155p OS=Drosophila melanogaster OX=7227 GN=tho2 PE=1 SV=2	-3.44687	-3.90332	-4.29581	-4.09274	-5.32982	-4.31893	-4.43934	-4.72024	0.767	0.0349619	S17
K.KPTKS(phos)PEASDQVENEPAPK.S	A1Z7A8	coil	Coilin OS=Drosophila melanogaster OX=7227 GN=coil PE=1 SV=1	-6.45667	-4.88628	-5.32713	-5.76653	-9.67483	-5.11573	-5.36648	-5.34466	0.766	0.490006	S204
R.PQS(phos)IDT(phos)SPTRR.E	Q7PLL3	eIF4B	Eukaryotic initiation factor 4B OS=Drosophila melanogaster OX=7227 GN=eIF4B PE=1 SV=1	-6.25773	-7.77388	-7.33792	-7.4233	-8.41332	-8.60173	-6.52821	-8.30627	0.764	0.203304	S234,T237
R.GES(phos)PIPGK.D	Q9VRU1	Dmel\CG10467	Aldose 1-epimerase OS=Drosophila melanogaster OX=7227 GN=Dmel\CG10467 PE=1 SV=1	-7.07455	-6.26814	-6.09842	-6.35302	-6.72136	-8.06122	-7.25297	-6.81357	0.764	0.0741534	S310
R.SGS(phos)SLS(phos)LR.N	E1JGN0	par-1	Non-specific serine/threonine protein kinase OS=Drosophila melanogaster OX=7227 GN=par-1 PE=1 SV=1	0.356528	-0.595799	-0.0932745	-0.548627	-1.82392	-0.143096	-0.266233	-1.70252	0.764	0.15216	S809,S812
K.NVHIWDGNS(phos)SREFLDK.M	Q541C9	Ts	RE18955p OS=Drosophila melanogaster OX=7227 GN=Ts PE=1 SV=1	-7.84409	-9.0798	-7.24094	-7.66101	-8.72639	-8.91003	-8.59821	-8.64327	0.763	0.0893508	S120
K.LLNTS(phos)DVK.A	M9PB54	homer	Homer isoform F OS=Drosophila melanogaster OX=7227 GN=homer PE=1 SV=1	2.58957	1.83794	2.49061	2.52581	1.68022	1.40933	1.71702	1.58874	0.762	0.00982899	S184
R.YYGS(phos)GGEQSEHSEDVDEEC(cam)YSSGGGGAAR.R	Q9W2U7	nocte	LP18708p OS=Drosophila melanogaster OX=7227 GN=nocte PE=1 SV=4	-5.35204	-5.11881	-5.9473	-6.09853	-7.47058	-5.557	-6.25098	-6.28056	0.761	0.12647	S1133
R.VTPNENAPEGENSKPQHPQQAANLNNS(phos)C(cam)SPKKS(phos)PK.N	Q6AWG9	CG5098	Uncharacterized protein CG5098 OS=Drosophila melanogaster OX=7227 GN=CG5098 PE=1 SV=1	3.75389	1.92848	1.50989	1.40256	1.11399	0.73602	3.1309	0.568965	0.761	0.33955	S448,S454
R.S(phos)IS(phos)KEPKPNDSNYR.S	Q9XZ21	snama	Something that sticks like glue isoform A OS=Drosophila melanogaster OX=7227 GN=snama PE=1 SV=1	-1.39653	-1.49148	-1.39293	-1.43986	-2.33508	-2.12495	-2.07438	-2.23027	0.761	0.00123915	S733,S735
M.VLT(phos)PTKDGPDQESMPLPADN(d)GESPSK.Q	Q541C9	Ts	RE18955p OS=Drosophila melanogaster OX=7227 GN=Ts PE=1 SV=1	-4.45899	-6.18126	-4.8405	-5.96492	-5.98278	-6.0914	-7.6938	-4.72341	0.761	0.302217	T5
R.ATS(phos)NVFAM(ox)FDQAQIAEFK.E	P40423	sqh	Myosin regulatory light chain sqh OS=Drosophila melanogaster OX=7227 GN=sqh PE=1 SV=1	-6.19545	-9.08216	-7.46637	-8.4418	-8.68257	-8.33188	-9.98818	-7.22176	0.76	0.362896	S23
R.RSLSQGS(phos)FGDENDYEAQR.E	Q9VXN3	Dmel\CG8578	LD07988p OS=Drosophila melanogaster OX=7227 GN=Dmel\CG8578 PE=1 SV=2	-3.30366	-3.57787	-6.00586	-5.77583	-6.25344	-3.08011	-6.39962	-5.97068	0.76	0.459249	S289
K.TVVNPNNNNTSNSNNNNTSVS(phos)PTRK.S	Q8T9D1	Chro	SD06626p OS=Drosophila melanogaster OX=7227 GN=Chro PE=2 SV=1	-4.98246	-4.245	-4.82285	-5.11419	-5.66084	-5.12001	-6.34476	-5.07386	0.759	0.0647498	S159
R.LIDT(phos)DS(phos)DSNQDVGK.K	Q94546	Atu	Another transcription unit protein OS=Drosophila melanogaster OX=7227 GN=Atu PE=1 SV=2	-1.89351	-3.08226	-1.9529	-3.00768	-5.02123	-1.39763	-5.37745	-1.17452	0.759	0.503817	T287,S289
R.VLNKS(phos)DGDSDAK.S	O61380	eIF4G1	Eukaryotic translation initiation factor 4G1 isoform A OS=Drosophila melanogaster OX=7227 GN=eIF4G1 PE=1 SV=3	-3.22379	-1.2341	-2.78119	-2.98055	-3.44603	-3.17707	-3.656	-2.97348	0.758	0.135519	S735
R.DLMEERHS(phos)R.G	X2JJP5	Sec16	Secretory 16 isoform H OS=Drosophila melanogaster OX=7227 GN=Sec16 PE=1 SV=1	-5.56389	-5.48442	-6.13065	-5.51228	-6.96961	-5.78254	-6.08893	-6.88138	0.758	0.0541968	S744
K.NGS(phos)VERPSTPAGGIGSAK.Q	Q5KTT4	dNAT1	Uncharacterized protein dNAT1 (Fragment) OS=Drosophila melanogaster OX=7227 GN=dNAT1 PE=2 SV=1	-6.04509	-4.6203	-5.71785	-5.30291	-5.50277	-6.76406	-5.68295	-6.7644	0.757	0.126249	S1094
R.SALASSSKEEAS(phos)PVTR.V	A4V3G8	ball	Ballchen isoform B OS=Drosophila melanogaster OX=7227 GN=ball PE=1 SV=1	-3.64905	-3.21083	-4.59222	-3.79937	-3.98274	-4.6677	-4.71391	-4.91315	0.757	0.0650133	S565
R.VQDMS(phos)FEAK.E	M9PFZ1	Nopp140	Nopp140 isoform E OS=Drosophila melanogaster OX=7227 GN=Nopp140 PE=1 SV=1	-3.01307	-2.87628	-2.51884	-2.7685	-3.29697	-3.77786	-3.59871	-3.53113	0.757	0.00492644	S633
R.AKYNQQNSS(phos)NLNAC(cam)MGSTDPNKVVEK.I	Q9VI56	Dmel\CG1943	GEO05313p1 OS=Drosophila melanogaster OX=7227 GN=Dmel\CG1943 PE=1 SV=1	-4.1654	-4.34771	-5.34592	-4.56237	-5.32982	-4.70256	-6.19169	-5.21849	0.755	0.0935145	S53
K.K(ac)PAKQ(d)S(phos)PQPAVETK.S	Q9VZQ1	Ythdc1	YTH domain-containing protein 1 OS=Drosophila melanogaster OX=7227 GN=Ythdc1 PE=2 SV=2	-5.47983	-5.20725	-5.09749	-5.16826	-6.14325	-6.43077	-5.52213	-5.87589	0.755	0.0143347	S88
R.SNS(phos)DGLSTDYAHS(phos)LPKKDDQNALSR.L	Q4V5X3	CG14184	IP06477p (Fragment) OS=Drosophila melanogaster OX=7227 GN=CG14184 PE=2 SV=1	-3.57185	-3.38802	-3.84234	-3.38236	-5.18084	-3.43238	-4.00149	-4.5843	0.754	0.0870545	S50,S60
K.SAVS(phos)S(phos)PEQLPSPTSPIAAEIGDKPYGR.G	Q29R25	CG6718	RE23733p OS=Drosophila melanogaster OX=7227 GN=CG6718 PE=2 SV=1	1.72164	1.5463	1.67434	1.54938	1.25901	0.728604	0.82587	0.663044	0.754	0.00479047	S538,S539
M.S(phos)DSAVAT(phos)SASPVAAPPATVEK.K	C4IY08	His1:CG33852-RA	FI07715p (Fragment) OS=Drosophila melanogaster OX=7227 GN=His1:CG33852-RA PE=2 SV=1	-4.23887	-4.33593	-3.96044	-4.35655	-4.19725	-4.22379	-5.97623	-5.51007	0.754	0.1297	S8,T14
K.DS(phos)PPDSPSGGVEK.K	A0A0H4Y1G5	hyd-RA	FI24602p1 OS=Drosophila melanogaster OX=7227 GN=hyd-RA PE=2 SV=1	-5.83111	-6.19184	-5.2662	-6.0526	-6.59266	-7.07683	-6.37743	-6.30886	0.754	0.0296865	S968
K.SKS(phos)VEHDTSYSC(cam)NSSNLDQQYPALEK.T	E1JJD6	tyf	Twenty-four isoform F OS=Drosophila melanogaster OX=7227 GN=tyf PE=1 SV=2	-1.77491	-2.08404	-3.63361	-2.34009	-2.78461	-3.15495	-3.7925	-3.11207	0.753	0.128843	S1069
R.HPS(phos)SPTLSTTSSTSSTSDHQR.R	Q95V18	PDZ-GEF	Guanine nucleotide exchange factor OS=Drosophila melanogaster OX=7227 GN=PDZ-GEF PE=2 SV=1	-1.42752	-2.50259	-1.49847	-1.38993	-1.98095	-2.89462	-2.27134	-2.6837	0.753	0.0581236	S1236
K.TSISSESS(phos)PEK.T	Q24574	Usp47	Ubiquitin carboxyl-terminal hydrolase 47 OS=Drosophila melanogaster OX=7227 GN=Usp47 PE=1 SV=2	-2.71125	-3.11964	-3.48215	-3.69426	-4.10655	-4.41816	-3.78883	-3.70672	0.753	0.0305516	S174
R.ADYTNSSSC(cam)GS(phos)PIGNTNIR.R	M9NF18	FBXL5	Uncharacterized protein isoform D OS=Drosophila melanogaster OX=7227 GN=FBXL5 PE=1 SV=1	-0.137534	-0.207505	-0.608522	-0.420063	-2.20483	-0.0636958	-0.697505	-1.4161	0.752	0.138235	S484
K.LIVSS(phos)PGSADISK.I	Q6AWS1	CG30015	SD19814p OS=Drosophila melanogaster OX=7227 GN=CG30015 PE=2 SV=1	-2.87243	-2.66811	-1.93501	-0.681564	-2.37345	-3.01892	-2.78884	-2.98295	0.752	0.166657	S898
R.EAT(phos)PPIISLS(phos)PQKK.T	Q9VID9	BEST:LD19244	Uncharacterized protein isoform B OS=Drosophila melanogaster OX=7227 GN=BEST:LD19244 PE=1 SV=3	-0.858203	-0.617917	-0.539302	-0.28533	-0.0703105	-1.69185	-0.646849	-2.89988	0.752	0.242733	T975,S982
K.VNT(phos)PPKPAQ(d)AQAIPS(phos)PPPPTIVSLPPARDEFATYGEYVANEMR.A	Q7K4R2	Dmel\CG11504	LD26477p OS=Drosophila melanogaster OX=7227 GN=Dmel\CG11504 PE=2 SV=1	-4.93081	-3.69148	-4.17889	-3.94122	-3.60861	-2.88548	-9.13575	-4.1158	0.751	0.586985	T341,S353
R.EAT(phos)PPIISLS(phos)PQK.K	Q9VID9	BEST:LD19244	Uncharacterized protein isoform B OS=Drosophila melanogaster OX=7227 GN=BEST:LD19244 PE=1 SV=3	-5.38642	-6.38466	-5.03517	-5.33004	-7.3191	-6.71147	-4.51606	-6.59219	0.751	0.271264	T975,S982
K.KVAEKDS(phos)ES(phos)DVDAGTEDEK.S	Q9VX35	CC4	LD36501p OS=Drosophila melanogaster OX=7227 GN=CC4 PE=1 SV=1	-2.63694	-1.76493	-1.69526	-2.19272	-2.22574	-3.81033	-2.81656	-2.43599	0.75	0.101396	S179,S181
R.RNS(phos)HGFLLSPEIEPSTPS(phos)LR.T	Q24458	Ask1	Protein kinase OS=Drosophila melanogaster OX=7227 GN=Ask1 PE=2 SV=1	-2.84828	-3.14511	-2.59173	-2.63561	-4.47913	-2.92237	-3.39408	-3.42406	0.75	0.0668956	S420,S435
R.AGT(phos)AT(phos)PQPGNTSTPRPPS(phos)AGPQPPPPSTHSQTASSPLSPTR.H	P08928	Lam	Lamin Dm0 OS=Drosophila melanogaster OX=7227 GN=Lam PE=1 SV=4	-5.7663	-5.52397	-5.66971	-5.90249	-6.46254	-6.55269	-6.46834	-6.37714	0.75	0.00196833	T11,T13,S26
R.DNTQVQDMDEASS(phos)DEDTPTTK.L	Q9VEP9	Sf3a1	GH03554p OS=Drosophila melanogaster OX=7227 GN=Sf3a1 PE=1 SV=1	-5.12031	-5.35992	-5.57799	-5.0395	-6.60868	-5.76904	-6.52821	-5.18751	0.749	0.070207	S373
R.SAS(phos)EPNLTQSQLQNDEFLYLPS(phos)PK.T	P11346	Raf	Raf homolog serine/threonine-protein kinase Raf OS=Drosophila melanogaster OX=7227 GN=Raf PE=1 SV=6	-1.98932	-2.40706	-3.94603	-1.03918	-1.81862	-4.93906	-2.70008	-2.91793	0.749	0.392979	S702,S721
R.KRES(phos)PIGR.S	Q6AWQ1	SRm160	RE71183p OS=Drosophila melanogaster OX=7227 GN=SRm160 PE=2 SV=1	-1.00404	0.225329	-1.05996	-1.39888	-1.39895	-0.81752	-1.59471	-2.41661	0.748	0.148108	S618
R.ASS(phos)C(cam)PNIYR.N	Q8T043	chk	LD30953p OS=Drosophila melanogaster OX=7227 GN=chk PE=2 SV=1	-2.66832	-2.64068	-2.61054	-2.63561	-2.86981	-5.99397	-1.59471	-3.08123	0.746	0.410863	S652
R.RQVS(phos)VDNVPTVS(phos)SHNLSNAGS(phos)PLPVAR.H	H6WS59	Patronin	Patronin (Fragment) OS=Drosophila melanogaster OX=7227 GN=Patronin PE=2 SV=1	-4.3031	-4.37156	-3.9971	-4.13399	-4.80022	-3.52862	-5.95965	-5.49915	0.745	0.182541	S535,S543,S552
R.TNS(phos)RGT(phos)PTSSGDALLDTSFSSAGDAER.D	M9PIC3	ptdss1	Uncharacterized protein isoform B OS=Drosophila melanogaster OX=7227 GN=ptdss1 PE=1 SV=1	1.78576	1.30902	1.21498	1.6008	1.07889	0.683291	0.68467	0.48559	0.745	0.00979233	S8,T11
K.SYAT(phos)AQSPTVAPSSSALM(ox)ANDDAGK.C	Q9W1H5	DCP1	Decapping protein 1 isoform A OS=Drosophila melanogaster OX=7227 GN=DCP1 PE=1 SV=1	-3.01307	-3.52341	-4.07857	-3.98369	-4.80022	-4.0122	-4.7491	-4.0191	0.745	0.0561574	T267
K.QAAAKPM(ox)VVEDEES(phos)T	Q24034	Mybbp1A	Lethal(1)1Bi protein OS=Drosophila melanogaster OX=7227 GN=Mybbp1A PE=4 SV=1	-4.01798	-4.25883	-5.2662	-4.9213	-5.60864	-4.90544	-5.78881	-5.13589	0.744	0.0695968	S1133
K.EAAN(d)GAS(phos)SSNGKELDTIKEGSDEADSTGEAEQAQSDEKPSK.K	Q9I7K6	CG8223	Protein NASP homolog OS=Drosophila melanogaster OX=7227 GN=CG8223 PE=1 SV=1	-5.60378	-4.83149	-7.36578	-5.09079	-8.28138	-6.54117	-5.12086	-5.92615	0.744	0.388374	S166
R.S(phos)RS(phos)FS(phos)SRPR.R	Q9V3W7	SF2	LD40489p OS=Drosophila melanogaster OX=7227 GN=SF2 PE=1 SV=1	-5.44318	-4.49712	-4.78389	-5.28953	-5.15387	-6.90311	-5.57167	-5.35939	0.744	0.127827	S224,S226,S228
K.QGQQNVPHFYQNKS(phos)PQEPQR.H	Q9VUC4	Dmel\CG13484	GEO11166p1 OS=Drosophila melanogaster OX=7227 GN=Dmel\CG13484 PE=1 SV=1	0.3036	0.262125	-0.246678	-0.137559	-1.38321	-0.156765	-0.0247598	-1.22982	0.744	0.0836658	S65
R.DGS(phos)M(ox)GPPKR.M	Q9VT61	Dmel\CG8108	LD27033p OS=Drosophila melanogaster OX=7227 GN=Dmel\CG8108 PE=1 SV=1	-3.93677	-6.9296	-4.29886	-6.39969	-6.50281	-6.73752	-4.8795	-6.41766	0.743	0.378015	S182
R.LS(phos)PPMAQQQQPSNYGR.G	Q7JRJ1	Eaf	Ell-associated factor Eaf OS=Drosophila melanogaster OX=7227 GN=Eaf PE=1 SV=1	6.02048	-0.733897	0.188278	-1.27836	-1.07426	1.12861	-0.487936	1.65892	0.743	0.664681	S294
K.SAVS(phos)S(phos)PEQLPSPTS(phos)PIAAEIGDKPYGR.G	Q29R25	CG6718	RE23733p OS=Drosophila melanogaster OX=7227 GN=CG6718 PE=2 SV=1	-3.01307	-0.426188	-0.0444963	-0.167838	-0.991355	-1.61815	-1.61485	-2.39749	0.743	0.325735	S538,S539,S548
R.DDDEIDVVS(phos)PHVTPFVTQDHR.N	Q9VAF4	dgt1	Dim gamma-tubulin 1 isoform A OS=Drosophila melanogaster OX=7227 GN=dgt1 PE=1 SV=2	-3.11171	-1.99451	-2.10465	-1.98302	-3.59223	-4.81597	-1.18027	-2.57229	0.742	0.357618	S165
K.HSPSGGASGGGDAS(phos)PTSNLLGMK.N	M9PEU6	CG43113	Uncharacterized protein isoform F OS=Drosophila melanogaster OX=7227 GN=CG43113 PE=1 SV=1	-1.67592	-1.96586	-1.8376	-1.83598	-2.51213	-2.63537	-2.87367	-2.25874	0.741	0.00521201	S101
R.KRS(phos)GS(phos)SPGGGGGHDDDYAENGPR.N	Q9VM49	Caper	Caper isoform A OS=Drosophila melanogaster OX=7227 GN=Caper PE=1 SV=1	-3.40046	-3.84163	-5.28421	-5.40741	-4.00426	-5.852	-4.95145	-6.08841	0.741	0.287396	S34,S36
K.FDGFEAHNFSS(phos)DFGNAS(phos)FGTTGK.E	Q8MMD2	Eps-15	Epidermal growth factor receptor pathway substrate clone 15 isoform B OS=Drosophila melanogaster OX=7227 GN=Eps-15 PE=1 SV=1	-4.79531	-3.52341	-3.34352	-3.79228	-4.85564	-4.69297	-5.17247	-3.69267	0.74	0.131576	S1175,S1181
R.FDGFGNN(d)GDNRDS(phos)GNWR.R	Q7PLL3	eIF4B	Eukaryotic initiation factor 4B OS=Drosophila melanogaster OX=7227 GN=eIF4B PE=1 SV=1	-8.77888	-8.98698	-7.9466	-9.42234	-10.2561	-9.64291	-9.03213	-9.16423	0.74	0.106311	S183
R.ASASRRS(phos)S(phos)EDSVEEEGR.S	Q9VXN3	Dmel\CG8578	LD07988p OS=Drosophila melanogaster OX=7227 GN=Dmel\CG8578 PE=1 SV=2	-3.81004	-2.83425	-3.86023	-3.40382	-4.89083	-4.11946	-4.17487	-3.68029	0.739	0.066238	S105,S106
K.KS(phos)PNATGIATTSK.S	M9NF18	FBXL5	Uncharacterized protein isoform D OS=Drosophila melanogaster OX=7227 GN=FBXL5 PE=1 SV=1	0.20603	0.0817611	-0.0638101	0.109669	-1.58005	-0.0766294	-0.324755	-0.642835	0.739	0.0603688	S266
R.T(phos)PPASIDSPT(phos)RPRS(phos)PDTMDYEDEDSR.S	Q9W1R5	vir	Protein virilizer OS=Drosophila melanogaster OX=7227 GN=vir PE=1 SV=1	-0.919809	0.93658	0.599779	0.453405	-0.54788	-0.813184	-1.20144	0.678144	0.739	0.21271	T289,T298,S302
K.TES(phos)DSEDAIQK.L	Q8IH14	ssx	LD21345p OS=Drosophila melanogaster OX=7227 GN=ssx PE=1 SV=1	-6.632	-4.70868	-4.71306	-4.73297	-5.93609	-7.47893	-5.24095	-5.08198	0.738	0.308733	S146
R.SGSS(phos)PGGGGGHDDDYAEN(d)GPR.N	Q9VM49	Caper	Caper isoform A OS=Drosophila melanogaster OX=7227 GN=Caper PE=1 SV=1	-2.47097	-5.49749	-3.1021	-3.86235	-5.55827	-5.34187	-3.11627	-3.86932	0.738	0.390957	S37
K.SLPAPAPEYIEDLTKS(phos)PK.R	Q8T096	CG15439	LD18949p OS=Drosophila melanogaster OX=7227 GN=CG15439 PE=2 SV=1	2.40403	1.33803	0.515534	1.14214	0.873043	-0.184497	0.244862	1.51497	0.738	0.189341	S483
R.RLVS(phos)GGSSSSGAHAEGK.K	B6IDZ6	osa-RC	LD42748p (Fragment) OS=Drosophila melanogaster OX=7227 GN=osa-RC PE=2 SV=1	-2.84828	-2.63165	-3.07572	-2.6895	-2.93719	-3.60152	-3.72264	-3.93214	0.737	0.0224806	S1922
R.S(phos)AQGNELFR.R	Q500Y6		SD07352p OS=Drosophila melanogaster OX=7227 PE=2 SV=1	-3.08182	-3.49693	-3.23591	-3.20706	-3.36493	-3.41914	-3.53284	-5.65392	0.737	0.203946	S507
K.KPQDNLKPEGEFYS(phos)PEKPK.Y	A1Z9M5	Dmel\CG30069	Uncharacterized protein OS=Drosophila melanogaster OX=7227 GN=Dmel\CG30069 PE=1 SV=1	-1.96314	-1.91021	-1.9529	-1.90444	-2.42895	-3.66573	-2.04676	-2.53003	0.735	0.0693811	S1450
R.NAS(phos)QPAFLAGDHQSLPK.N	Q9W0L6	Dmel\CG13907	GH22266p OS=Drosophila melanogaster OX=7227 GN=Dmel\CG13907 PE=1 SV=1	-3.91653	-3.89465	-3.48736	-3.78522	-4.53371	-4.53611	-4.4451	-4.50849	0.735	0.00274951	S401
R.ADQLEQGAS(phos)QFEQQAGK.L	H1UUB1	Syb	GEO12465p1 OS=Drosophila melanogaster OX=7227 GN=Syb PE=1 SV=1	-5.21599	-4.83563	-5.42364	-5.18055	-6.68076	-5.81686	-5.70351	-5.39435	0.735	0.0462224	S69
K.EAAAAEEPQPS(phos)DEGDVVAKR.E	Q9VP57	pzg	LD15904p OS=Drosophila melanogaster OX=7227 GN=pzg PE=1 SV=1	-9.03397	-7.83226	-8.5976	-8.74358	-8.94567	-7.71996	-10.1949	-10.2878	0.735	0.267742	S723
R.KAS(phos)AETVEAVSTSGEEHLAQ(d)IEEATEPVTESEPAQSELLPEEGEENKTR.R	B7Z0I8	CG14896	Uncharacterized protein OS=Drosophila melanogaster OX=7227 GN=CG14896 PE=1 SV=1	-6.71345	-7.00968	-6.61532	-7.24228	-6.06079	-6.95719	-6.94813	-10.5518	0.734	0.45213	S2914
R.TPS(phos)S(phos)PSNSYHIDVDHR.L	Q7YU20	rb	AP-3 complex subunit beta OS=Drosophila melanogaster OX=7227 GN=rb PE=2 SV=1	-4.65041	-5.06434	-4.59596	-4.22021	-6.43631	-5.91751	-4.07326	-5.03788	0.734	0.195961	S303,S304
K.EAVQVS(phos)PVK.A	Q9VNC3	Hcs	Holocarboxylase synthetase isoform A OS=Drosophila melanogaster OX=7227 GN=Hcs PE=1 SV=2	0.382281	1.61428	0.861043	0.00328334	-1.27755	-0.866095	1.02777	1.04141	0.734	0.29821	S389
R.TPLHSLLGIADEDYVSPADAAAALKDRT(phos)PS(phos)PR.L	Q8IGB6	CG15118	RH65876p (Fragment) OS=Drosophila melanogaster OX=7227 GN=CG15118 PE=2 SV=1	1.426	0.486024	0.579175	1.03821	0.652084	-2.33266	1.52786	0.744205	0.734	0.392693	T301,S303
R.SKS(phos)KHS(phos)LNETPLPK.V	Q9VDW6	Dys	Dystrophin isoforms A/C/F/G/H OS=Drosophila melanogaster OX=7227 GN=Dys PE=1 SV=3	-3.99924	-3.38802	-4.01453	-3.71647	-4.35723	-4.36135	-4.18447	-5.14862	0.733	0.0308178	S1820,S1823
R.VC(cam)QEDFSSFC(cam)S(phos)QEK.S	Q9VP27	Glg1	Golgi complex-localized glycoprotein 1 isoform A OS=Drosophila melanogaster OX=7227 GN=Glg1 PE=1 SV=2	-8.19259	-7.89656	-8.37028	-8.54611	-8.43913	-8.97674	-9.67082	-8.84955	0.733	0.0423686	S233
R.YGS(phos)QESLR.H	M9PC73	Liprin-alpha	Liprin-alpha isoform C OS=Drosophila melanogaster OX=7227 GN=Liprin-alpha PE=1 SV=1	-3.73282	-3.81891	-5.58541	-3.78053	-3.65513	-3.92354	-3.69492	-8.57752	0.733	0.552558	S767
K.SISGDPLETAMEDS(phos)GDEYGR.D	Q9VUE5	stwl	LD17962p OS=Drosophila melanogaster OX=7227 GN=stwl PE=1 SV=1	-3.39696	-3.53852	-3.18427	-3.16828	-3.49765	-3.68779	-5.00149	-4.02888	0.732	0.0688787	S302
R.EGGGGS(phos)GNRGDSR.D	X2JC79	eIF4H1	Eukaryotic translation initiation factor 4H1 isoform D OS=Drosophila melanogaster OX=7227 GN=eIF4H1 PE=1 SV=1	-9.8336	-9.21567	-10.074	-10.8697	-10.8265	-11.0754	-10.7646	-10.2536	0.732	0.0898635	S161
R.ATS(phos)IGASSSPEHGGGPAWK.Q	U3R9T8	didum-RC	FI23904p1 OS=Drosophila melanogaster OX=7227 GN=didum-RC PE=2 SV=1	-5.87925	-6.51274	-6.17476	-5.99718	-6.64277	-7.39567	-5.96792	-7.48255	0.731	0.0890155	S1590
R.S(phos)VSRSDIENEHIEVEK.S	Q9VQK5	Dmel\CG3542	LD24714p OS=Drosophila melanogaster OX=7227 GN=Dmel\CG3542 PE=1 SV=1	-6.1241	-6.38466	-6.64604	-6.09853	-6.0508	-5.26881	-10.0058	-6.85054	0.731	0.470659	S661
R.YALPESSSSGSSN(d)GS(phos)HSPGSN(d)GSSPAGAAGSR.L	Q962F2	bif	Protein phosphatase 1-binding protein Bifocal OS=Drosophila melanogaster OX=7227 GN=bif PE=2 SV=1	-1.7356	-3.49858	-1.20251	-2.35743	-3.52849	-3.35471	-2.00894	-2.82133	0.73	0.233707	S1147
K.KT(phos)ENSPVVEIES(phos)SDPDVEIKPPVK.E	Q9VYY7	HP5	Heterochromatin protein 5 isoform B OS=Drosophila melanogaster OX=7227 GN=HP5 PE=1 SV=1	-4.35321	-4.85652	-4.11571	-3.8281	-6.85919	-3.36737	-6.2014	-3.64378	0.73	0.412374	T521,S531
M(ox)(ac)ETS(phos)SSSPVKPR.R	Q9I7H9	sud1	Prolyl 3-hydroxylase sudestada1 OS=Drosophila melanogaster OX=7227 GN=sud1 PE=2 SV=1	2.1579	0.475617	0.504649	0.309717	-0.237186	0.512452	0.152543	0.104718	0.729	0.140122	S5
K.GRNS(phos)STPILK.D	Q8INM3	sle	Protein slender lobes OS=Drosophila melanogaster OX=7227 GN=sle PE=1 SV=1	-7.79894	-8.13294	-8.36516	-8.21241	-8.40821	-8.95824	-9.11051	-8.94701	0.729	0.0133669	S548
R.RS(phos)TTLYEK.T	E1JGN0	par-1	Non-specific serine/threonine protein kinase OS=Drosophila melanogaster OX=7227 GN=par-1 PE=1 SV=1	-1.07236	-1.57989	-1.12947	-2.08046	-3.08218	-1.18944	-1.64768	-2.85571	0.728	0.177869	S975
K.EAPVELPAPQVDVEQPVVVATTS(phos)PVHVPTADVVEPK.D	M9MRJ4	Msp300	Muscle-specific protein 300 kDa isoform G OS=Drosophila melanogaster OX=7227 GN=Msp300 PE=1 SV=1	-3.50612	-4.19095	-3.84456	-3.32153	-2.01088	-2.70596	-2.78884	-10.267	0.727	0.695146	S10233
K.ISTLNAAN(d)SS(phos)PR.Q	B7Z0I8	CG14896	Uncharacterized protein OS=Drosophila melanogaster OX=7227 GN=CG14896 PE=1 SV=1	-5.63651	-7.3453	-5.93776	-7.42038	-6.86618	-6.59971	-6.97121	-8.81125	0.727	0.291173	S2136
R.YNYNDT(phos)ETDFSPPPSPPPVPSGR.S	X2J786	Tango1	Transport and golgi organization 1 isoform D OS=Drosophila melanogaster OX=7227 GN=Tango1 PE=4 SV=1	-2.30559	-1.64199	-1.98937	-2.37499	-2.19105	-2.30196	-3.72614	-3.00208	0.727	0.097568	T1398
K.INAASSNT(phos)PEIINLGNFDNSLPPTFFK.N	Q7K180	Map60	LD02709p OS=Drosophila melanogaster OX=7227 GN=Map60 PE=1 SV=1	-2.67893	-3.17104	-3.30471	-3.36121	-4.38518	-3.57926	-3.8203	-3.63629	0.726	0.0251215	T374
K.IIIKNDT(phos)DEDDEMHGSPK.K	Q500Y6		SD07352p OS=Drosophila melanogaster OX=7227 PE=2 SV=1	-2.51783	-2.78337	-2.61054	-2.8277	-3.33888	-2.66631	-2.52978	-5.10661	0.726	0.234103	T698
R.S(phos)GNVPGS(phos)DKLR.R	Q9VHP9	Cenp-C	Centromeric protein-C isoform A OS=Drosophila melanogaster OX=7227 GN=Cenp-C PE=1 SV=4	-0.679738	-1.17388	0.132803	-1.01146	-2.69441	-1.32485	-0.552522	-1.05985	0.725	0.197709	S126,S132
K.AEEPDVDEES(phos)GSK.S	B7YZZ9	Rrp1	DNA-(apurinic or apyrimidinic site) lyase OS=Drosophila melanogaster OX=7227 GN=Rrp1 PE=1 SV=1	-7.08807	-7.05725	-6.99767	-6.94726	-7.93808	-7.99372	-7.46829	-7.59191	0.725	0.00503616	S394
K.AEQDDVSMC(cam)TS(phos)EEEPTTSAATSPKPQQPQIVHQNAR.L	Q0KHR5	RhoGAP15B	Rho GTPase activating protein at 15B isoform B OS=Drosophila melanogaster OX=7227 GN=RhoGAP15B PE=1 SV=1	-2.94744	-2.12147	-2.02048	-1.82388	-3.52158	-2.13574	-3.77607	-2.37861	0.725	0.153475	S627
R.AVT(phos)PDC(cam)EPR.S	X2JEN2	l(1)G0196	Inositol hexakisphosphate and diphosphoinositol-pentakisphosphate kinase OS=Drosophila melanogaster OX=7227 GN=l(1)G0196 PE=1 SV=1	-5.94947	-6.00303	-5.86368	-5.4664	-6.36036	-6.73752	-6.94813	-6.13832	0.725	0.0191553	T1068
K.AEEPDVDEES(phos)GSK.T	P27864	Rrp1	Recombination repair protein 1 OS=Drosophila melanogaster OX=7227 GN=Rrp1 PE=1 SV=2	-2.4989	-2.64977	-2.36718	-2.45674	-3.31628	-3.54291	-2.96381	-3.04111	0.723	0.0063403	S394
R.AAGDTS(phos)KEST(phos)PLSAS(phos)PKK.N	Q86P47	Cnx99A	SD17909p (Fragment) OS=Drosophila melanogaster OX=7227 GN=Cnx99A PE=2 SV=1	-7.16954	-7.0689	-6.95666	-8.96389	-8.66418	-8.31217	-8.42888	-7.64625	0.723	0.186317	S627,T631,S636
K.TVELSTPEAAAASANS(phos)AK.K	Q9W3D1	Caf1-180	Chromatin assembly factor 1 p180 subunit OS=Drosophila melanogaster OX=7227 GN=Caf1-180 PE=1 SV=1	-0.540161	-1.32942	-0.861014	-0.792188	-0.636097	-0.527411	-3.39408	-1.85502	0.722	0.294941	S1036
R.YELLFMDDDDSS(phos)GLAQPQIAAVVAAPK.K	Q960D3	vig2	SD06613p OS=Drosophila melanogaster OX=7227 GN=vig2 PE=1 SV=1	-5.01436	-4.31554	-4.39669	-7.86815	-7.54431	-5.43473	-5.85628	-5.64788	0.722	0.442143	S21
M.A(ac)SEVAQIPAEETPAVAAAEKS(phos)EEPEK.S	Q59E30	fax	Failed axon connections isoform C OS=Drosophila melanogaster OX=7227 GN=fax PE=1 SV=1	-4.96677	-5.67903	-5.10814	-4.82648	-4.50616	-5.98614	-7.1403	-5.83415	0.722	0.218822	S23
R.LTN(d)GHSTTPVPAATVSS(phos)PS(phos)PTR.F	Q9VRP5	scny	Ubiquitin carboxyl-terminal hydrolase 36 OS=Drosophila melanogaster OX=7227 GN=scny PE=1 SV=3	-3.04018	-3.09461	-2.95061	-2.7685	-4.30883	-3.72477	-3.16296	-3.54509	0.722	0.028441	S514,S516
K.SPY(phos)LSPTGTISAANS(phos)C(cam)PAS(phos)PR.Q	M9PI07	FoxK	Forkhead box K isoform O OS=Drosophila melanogaster OX=7227 GN=FoxK PE=1 SV=1	-1.78634	-0.719477	-1.26448	-1.44449	-1.12901	-1.57346	-1.5055	-3.89056	0.721	0.282971	Y400,S412,S416
R.TNPIVY(phos)NESLKEEHVY(phos)DEIK.H	M9PGU6	drpr	Draper isoform E OS=Drosophila melanogaster OX=7227 GN=drpr PE=4 SV=1	-3.68283	-3.52675	-5.02	-4.00266	-8.72677	-3.23388	-3.22354	-3.92665	0.72	0.58219	Y925,Y935
K.T(phos)TTTAAGSDTDDNSDNIAPNAGQQQQQPR.Q	Q9VWP5	htk	Hat-trick isoform D OS=Drosophila melanogaster OX=7227 GN=htk PE=1 SV=4	-1.24297	-1.46718	-1.57031	-1.70811	-2.25409	-2.26596	-2.17847	-2.16414	0.719	0.00313046	T2344
R.NGHQHNGS(phos)ISSGTLQK.Q	Q9VUC6	Frl	Formin-like protein OS=Drosophila melanogaster OX=7227 GN=Frl PE=1 SV=3	-7.50503	-6.37257	-9.54662	-7.88817	-8.4868	-8.81265	-7.46361	-9.42253	0.718	0.348224	S42
R.SKS(phos)QVDEKPQS(phos)PVPLRR.E	D6W4T8	pod1	Coronin OS=Drosophila melanogaster OX=7227 GN=pod1 PE=1 SV=1	3.67795	3.18134	2.89871	2.67455	2.38201	2.48159	2.38286	2.31434	0.718	0.0200285	S727,S735
R.RSS(phos)S(phos)ESEYLISK.R	Q0E8R8	Dmel\CG5850	Uncharacterized protein isoform C OS=Drosophila melanogaster OX=7227 GN=Dmel\CG5850 PE=1 SV=2	-0.1504	0.536961	0.589514	0.672175	0.0301179	-0.0896799	-1.14762	-0.0116124	0.717	0.0701627	S383,S384
K.DGQLPTEEDIDLS(phos)DIDLDKDEL	Q9V438	CaBP1	Protein disulfide-isomerase A6 homolog OS=Drosophila melanogaster OX=7227 GN=CaBP1 PE=1 SV=1	-4.81859	-4.98861	-4.30804	-4.97919	-5.04581	-5.3171	-5.89516	-5.70316	0.717	0.0292804	S425
R.DYADYLDFDES(phos)PSTSPQPQSK.V	Q9W464	GAA1	Glycosylphosphatidylinositol anchor attachment 1 OS=Drosophila melanogaster OX=7227 GN=GAA1 PE=1 SV=1	-3.28571	-2.28172	-2.44102	-3.35423	-2.42089	-3.79828	-3.90507	-4.10542	0.717	0.155679	S661
K.I(ac)DN(d)PESSAKVS(phos)DAEEEEEEYAVEK.I	P05205	Su(var)205	Heterochromatin protein 1 OS=Drosophila melanogaster OX=7227 GN=Su(var)205 PE=1 SV=2	-6.43061	-6.68434	-6.84196	-7.00076	-6.54563	-8.59695	-7.96452	-6.71306	0.716	0.180371	S16
R.NQNS(phos)PDRVQTAQAN.L	Q9VIV2	swm	Zinc finger protein swm OS=Drosophila melanogaster OX=7227 GN=swm PE=1 SV=1	-6.89753	-5.9482	-6.82253	-5.72092	-7.24437	-7.59799	-7.02367	-6.38717	0.716	0.10212	S337
K.DKSEGDS(phos)PNIET(phos)PKK.A	P91638	smid	Smallminded protein OS=Drosophila melanogaster OX=7227 GN=smid PE=1 SV=1	3.70371	5.18757	7.03443	5.63458	2.74423	4.40449	5.10181	6.45066	0.715	0.474225	S544,T549
K.YAIDSPGS(phos)PSQ(d)YDIPPEDYALR.E	Q9VWD0	parvin	GH23568p OS=Drosophila melanogaster OX=7227 GN=parvin PE=1 SV=2	-7.39175	-7.79631	-9.16394	-6.18259	-8.04501	-10.5072	-7.8935	-6.94807	0.715	0.451065	S58
R.LS(phos)TSSTPESIR.S	Q9W396	HP1b	FI06908p OS=Drosophila melanogaster OX=7227 GN=HP1b PE=1 SV=1	-5.06915	-4.70111	-5.00499	-4.67094	-5.05077	-6.00976	-5.12547	-6.12149	0.715	0.0509492	S67
R.ALVTATGDPSAPSEELSPTS(phos)S(phos)DLLHK.F	Q9VJ30	Nak	Numb-associated kinase isoform A OS=Drosophila melanogaster OX=7227 GN=Nak PE=1 SV=2	-2.7443	-2.96422	-3.11548	-3.4911	-3.44276	-4.62148	-3.86979	-3.24249	0.715	0.0725236	S997,S998
R.SS(phos)PGLHFSAPR.T	Q9V4M2	wech	Protein wech OS=Drosophila melanogaster OX=7227 GN=wech PE=1 SV=2	-7.00026	-1.41203	-0.94507	-0.950965	-4.69929	-1.41724	-1.37609	-5.67219	0.714	0.683989	S508
R.SS(phos)PDPEDDEMS(phos)DGPAAR.R	Q9VN31	Fip1	Factor interacting with poly(A) polymerase 1 OS=Drosophila melanogaster OX=7227 GN=Fip1 PE=1 SV=1	-1.0935	-0.844293	-0.892324	-0.754363	-1.63493	-1.64102	-1.35222	-1.80798	0.713	0.00436002	S124,S133
R.SVS(phos)HDSYFDLLQSPQR.G	M9PDR8	CdGAPr	Cd GTPase activating protein-related isoform D OS=Drosophila melanogaster OX=7227 GN=CdGAPr PE=1 SV=1	-0.858203	-1.81005	-1.26821	-0.855465	-5.16999	-0.653511	-0.433254	-1.38752	0.713	0.511635	S852
K.NDFTST(phos)PNNTFSR.N	M9PFZ1	Nopp140	Nopp140 isoform E OS=Drosophila melanogaster OX=7227 GN=Nopp140 PE=1 SV=1	-2.05693	-1.79485	-1.62186	-1.85433	-2.69441	-2.30805	-2.45524	-2.72283	0.713	0.00561643	T591
R.TPY(phos)GTMTPSHDGS(phos)MTPR.H	Q9V460	Spt5	Transcription elongation factor SPT5 OS=Drosophila melanogaster OX=7227 GN=Spt5 PE=1 SV=1	-8.12601	-7.92805	-8.66522	-9.1642	-9.12679	-9.44137	-9.02521	-9.14066	0.713	0.0475958	Y844,S854
K.NDFTST(phos)PNNTFSR.N	M9MSM4	Nopp140	Nopp140 isoform F OS=Drosophila melanogaster OX=7227 GN=Nopp140 PE=1 SV=1	-2.05693	-1.79485	-1.62186	-1.85433	-2.69441	-2.30805	-2.45524	-2.72283	0.713	0.00561643	T591
K.IKDNS(phos)VSSVGSEMVIEPK.A	P42283	lola	Longitudinals lacking protein isoform G OS=Drosophila melanogaster OX=7227 GN=lola PE=1 SV=2	-2.45264	-1.98873	-2.55482	-1.7823	-1.68232	-2.23664	-3.76703	-3.94135	0.712	0.236896	S373
R.ALAC(cam)IHEEEGPS(phos)PPRT(phos)PTK.S	Q9VC45	asp	Protein abnormal spindle OS=Drosophila melanogaster OX=7227 GN=asp PE=1 SV=3	-3.45597	0.944148	1.59958	0.0268692	-2.79499	1.24233	-1.50175	-0.675093	0.711	0.59684	S361,T365
K.KWSS(phos)MDNISQGGPR.R	Q9VKF0	CycY	Cyclin Y isoform A OS=Drosophila melanogaster OX=7227 GN=CycY PE=1 SV=1	3.63842	2.36329	3.75909	1.19515	1.91723	1.75056	2.14902	2.29488	0.711	0.255261	S390
K.KSPT(phos)ITS(phos)PDKETPAPLPVDT(phos)PKK.S	Q8SWW4	anon-WO0140519.52	LD28380p OS=Drosophila melanogaster OX=7227 GN=anon-WO0140519.52 PE=1 SV=1	-1.78062	-2.09021	-1.78323	-1.00461	-2.50359	-3.35471	-1.53976	-2.10607	0.711	0.138895	T1018,S1021,T1034
R.KKPEDPSSEAEALC(cam)S(phos)PAK.R	Q9I7K6	CG8223	Protein NASP homolog OS=Drosophila melanogaster OX=7227 GN=CG8223 PE=1 SV=1	-3.11027	-3.22434	-2.59173	-2.75695	-4.06325	-3.39302	-4.05333	-3.01174	0.71	0.0509715	S486
K.QVS(phos)VEEPK.V	Q9W366	Dmel\CG12121	RE59932p OS=Drosophila melanogaster OX=7227 GN=Dmel\CG12121 PE=1 SV=1	-1.14407	-1.62846	-1.18831	-1.69703	-1.94583	-2.13033	-2.01965	-2.39749	0.709	0.011266	S288
R.IVAPETQTKPQS(phos)PINTK.V	Q9VUE5	stwl	LD17962p OS=Drosophila melanogaster OX=7227 GN=stwl PE=1 SV=1	-4.60518	-4.64189	-6.35336	-5.25661	-5.82982	-5.22668	-6.83492	-5.80027	0.709	0.196443	S481
K.ETPVPVT(phos)PEPVSPLPLPTEPPLIIK.G	Q9VDD2	SNF4Agamma	LD22662p OS=Drosophila melanogaster OX=7227 GN=SNF4Agamma PE=1 SV=2	0.0967209	-2.09641	-1.57031	-1.15571	-0.151337	-1.51949	-1.6394	-4.25113	0.709	0.454065	T339
R.AS(phos)ISFAGIR.D	Q9VUE5	stwl	LD17962p OS=Drosophila melanogaster OX=7227 GN=stwl PE=1 SV=1	-4.6546	-5.14426	-4.95124	-5.28953	-4.61596	-4.43672	-8.99351	-4.82535	0.708	0.50562	S333
R.KDKDKESS(phos)GDDR.S	Q9VT61	Dmel\CG8108	LD27033p OS=Drosophila melanogaster OX=7227 GN=Dmel\CG8108 PE=1 SV=1	-10.7157	-8.94926	-10.0231	-10.4717	-10.8823	-11.0117	-10.6476	-10.4462	0.707	0.116847	S447
K.APPPPS(phos)PLGLANAKPAASDSQT(phos)SPK.K	Q9W179	Slik	Sterile20-like kinase isoform B OS=Drosophila melanogaster OX=7227 GN=Slik PE=1 SV=2	-1.14775	-0.826155	-0.969147	-1.14815	-0.700493	-4.49942	-0.830162	-0.88988	0.707	0.433503	S483,T499
K.KS(phos)PTITS(phos)PDKETPAPLPVDTPK.K	Q8SWW4	anon-WO0140519.52	LD28380p OS=Drosophila melanogaster OX=7227 GN=anon-WO0140519.52 PE=1 SV=1	-2.04315	-3.69712	-1.84873	-2.49462	-3.8086	-4.52189	-2.17249	-2.40383	0.706	0.312059	S1016,S1021
K.LRDLS(phos)PNLSDSSPSSK.K	M9PFR5	Su(var)3-3	Probable lysine-specific histone demethylase 1 OS=Drosophila melanogaster OX=7227 GN=Su(var)3-3 PE=1 SV=1	-4.12711	-1.05444	-3.69252	-0.87719	-1.53586	-3.78124	-3.3529	-3.90669	0.706	0.472817	S843
R.SGKDGAGNGSDS(phos)EDADEGIDLGQVR.V	B6IDZ6	osa-RC	LD42748p (Fragment) OS=Drosophila melanogaster OX=7227 GN=osa-RC PE=2 SV=1	-4.49981	-2.98707	-5.66184	-3.87229	-4.50275	-3.87393	-4.20387	-7.26177	0.705	0.449306	S1773
R.GVS(phos)PQPR.Q	Q961R5	CG8547	GH09468p OS=Drosophila melanogaster OX=7227 GN=CG8547 PE=2 SV=1	-0.849185	-3.55379	-0.355521	-0.73157	-2.61871	-2.20221	-0.781535	-2.70705	0.705	0.402135	S332
K.RRS(phos)FIER.A	Q9V9U3	Anon1A3	LD45254p OS=Drosophila melanogaster OX=7227 GN=Anon1A3 PE=1 SV=1	-5.21599	-4.86073	-5.17938	-5.54371	-6.19729	-6.27002	-5.63608	-5.51555	0.705	0.0272981	S36
R.GAIS(phos)S(phos)GDEESTSSR.K	Q6AWQ1	SRm160	RE71183p OS=Drosophila melanogaster OX=7227 GN=SRm160 PE=2 SV=1	-1.51514	-0.443859	-0.484051	-0.568687	-2.51213	-1.86503	-0.576025	-0.87658	0.705	0.189683	S805,S806
R.NKSELEES(phos)DT(phos)DPQEQ	Q8IPG9	Bsg	Basigin isoform A OS=Drosophila melanogaster OX=7227 GN=Bsg PE=1 SV=1	1.70643	2.84174	2.81747	2.4899	1.84386	1.41858	1.95427	1.82415	0.704	0.0483745	S259,T261
R.M(ox)LQKS(phos)DDS(phos)ADEKEAPVSSK.A	Q59E34	Mi-2	Mi-2 isoform B OS=Drosophila melanogaster OX=7227 GN=Mi-2 PE=1 SV=1	-3.13198	-3.38802	-3.64133	-3.97563	-4.15118	-4.45281	-4.05333	-4.29528	0.704	0.0168424	S312,S315
R.S(phos)RS(phos)PIHLNGHANEEER.Q	Q9VFH2	Hexim	Hexamethylene bisacetamide inducible isoform A OS=Drosophila melanogaster OX=7227 GN=Hexim PE=2 SV=1	-3.78231	-1.50378	-2.44102	-2.44742	-3.27501	-3.09057	-3.26114	-3.36096	0.703	0.160639	S308,S310
R.QS(phos)PNHNPSNGIELHK.A	Q9W3Y4	pigs	GAS2-like protein pickled eggs OS=Drosophila melanogaster OX=7227 GN=pigs PE=2 SV=2	-1.14407	-4.13119	-4.75849	-0.831031	-5.3178	0.486308	-1.6108	-7.22895	0.702	0.713415	S343
N.SHS(phos)PNASLQLPS(phos)PIITR.R	Q9VVA0	CG9705	Cold shock domain-containing protein CG9705 OS=Drosophila melanogaster OX=7227 GN=CG9705 PE=1 SV=1	-6.82031	-7.36193	-6.77762	-7.38012	-8.56422	-7.72778	-7.57034	-7.28033	0.701	0.0650823	S25,S34
K.SS(phos)PSLDDSSHEELTLDEIKK.I	Q7YU03	Dmel\CG3632	LD11744p OS=Drosophila melanogaster OX=7227 GN=Dmel\CG3632 PE=1 SV=1	-2.12061	-1.31489	-1.45958	-1.02525	-2.72386	-2.42227	-2.84483	-0.731842	0.701	0.211927	S361
K.LNQ(d)LPS(phos)PTNS(phos)PYLC(cam)R.Q	M9PEG6	ZnT63C	Zinc transporter 63C isoform F OS=Drosophila melanogaster OX=7227 GN=ZnT63C PE=1 SV=1	-5.61189	-9.29545	-5.24254	-5.07924	-6.3359	-5.49457	-6.93186	-9.27155	0.701	0.569763	S390,S394
R.RSFT(phos)EHQDS(phos)PR.T	Q9VWE6	CG14215	Protein ELYS homolog OS=Drosophila melanogaster OX=7227 GN=CG14215 PE=1 SV=2	-5.73939	-4.81096	-6.64759	-6.72029	-6.21949	-8.72663	-6.06213	-5.71574	0.701	0.385617	T1866,S1871
R.KTEPSPS(phos)K.K	Q05344	Ssrp	FACT complex subunit Ssrp1 OS=Drosophila melanogaster OX=7227 GN=Ssrp PE=1 SV=2	-8.65973	-8.57836	-9.32363	-8.97242	-9.22217	-10.6992	-8.84386	-9.57093	0.7	0.136114	S648
K.MQPEVNAELKQES(phos)EDDEK.I	Q9VID9	BEST:LD19244	Uncharacterized protein isoform B OS=Drosophila melanogaster OX=7227 GN=BEST:LD19244 PE=1 SV=3	-8.24102	-5.22344	-3.79638	-4.95787	-6.50281	-6.42019	-5.1301	-6.957	0.698	0.481719	S1149
K.TGIEQEDALLNES(phos)AAR.E	M9NDR2	BicD	Bicaudal D isoform B OS=Drosophila melanogaster OX=7227 GN=BicD PE=1 SV=1	-2.65778	-2.72459	-2.86907	-3.07782	-3.4057	-3.34216	-3.09348	-4.27652	0.697	0.0428757	S104
K.LNQLPS(phos)PTNS(phos)PYLC(cam)R.Q	M9PEG6	ZnT63C	Zinc transporter 63C isoform F OS=Drosophila melanogaster OX=7227 GN=ZnT63C PE=1 SV=1	1.11647	2.23959	1.93167	2.3895	1.80573	2.05032	-0.937693	1.96932	0.697	0.362308	S390,S394
K.NDT(phos)DEDDEMHGS(phos)PK.K	Q500Y6		SD07352p OS=Drosophila melanogaster OX=7227 PE=2 SV=1	-3.12181	-3.03388	-2.66849	-3.72095	-3.20137	-3.78974	-3.02718	-5.31566	0.697	0.228693	T698,S707
R.YSPNMSIYS(phos)PSSTK.Y	P04052	RpII215	DNA-directed RNA polymerase II subunit RPB1 OS=Drosophila melanogaster OX=7227 GN=RpII215 PE=3 SV=4	-7.6116	-6.47737	-7.32544	-6.78828	-6.94351	-7.25542	-6.75406	-10.0326	0.696	0.382625	S1834
K.NYAADS(phos)PTSQEEAEC(cam)SAAGAER.Q	A0A0C4DHA1	Cdep	Chondrocyte-derived ezrin-like domain containing protein isoform F OS=Drosophila melanogaster OX=7227 GN=Cdep PE=1 SV=1	-2.89701	-3.19744	-3.18427	-3.34555	-4.77125	-3.40602	-4.1071	-3.1225	0.696	0.102733	S487
R.RSTS(phos)VSESELLS(phos)PVEEQPPK.Q	E2QC61	bin3	Bicoid-interacting protein 3 isoform B OS=Drosophila melanogaster OX=7227 GN=bin3 PE=1 SV=1	0.539325	-0.717088	-0.121666	-1.57535	-0.282105	-0.184497	-3.09348	-1.1005	0.696	0.382213	S681,S689
K.QAETEM(ox)S(phos)DEDKPSEIK.S	Q8INM3	sle	Protein slender lobes OS=Drosophila melanogaster OX=7227 GN=sle PE=1 SV=1	-5.43597	-5.49749	-4.25085	-6.13395	-5.63824	-7.63425	-5.63608	-5.19189	0.696	0.302184	S947
R.GGS(phos)PAPAENNSNSNSSTLYNDNENPK.T	Q6AWG9	CG5098	Uncharacterized protein CG5098 OS=Drosophila melanogaster OX=7227 GN=CG5098 PE=1 SV=1	3.625	1.78414	1.1466	1.50208	1.33236	0.628562	2.97285	0.350731	0.693	0.382163	S487
K.N(d)GAQELQNTTT(phos)ESTA	Q95RE4	yps	LD37574p OS=Drosophila melanogaster OX=7227 GN=yps PE=1 SV=1	-7.39735	-7.78345	-6.80682	-7.58713	-7.83168	-8.77979	-7.66126	-8.0748	0.693	0.0688718	T349
R.KRS(phos)TS(phos)PVSTPQVSSSNIEPTSTTVDKR.R	Q500Y6		SD07352p OS=Drosophila melanogaster OX=7227 PE=2 SV=1	3.09691	2.30864	2.23145	2.28509	2.22072	2.25774	2.45228	0.2227	0.692	0.231192	S625,S627
K.LEDKEEKPLDGST(phos)EEK.A	A0A0B4LFV9	MESR4	Misexpression suppressor of ras 4 isoform C OS=Drosophila melanogaster OX=7227 GN=MESR4 PE=1 SV=1	-0.0522719	-1.36265	-1.08605	-0.714708	-1.09976	-1.43379	-1.78701	-1.66012	0.691	0.0678263	T1515
K.TASGC(cam)ST(phos)MDNSTDSMSIPLAADR.T	Q9VUA5	ssp2	LD42058p OS=Drosophila melanogaster OX=7227 GN=ssp2 PE=1 SV=1	-1.56349	-1.36639	-0.906783	-0.676114	-1.38713	-3.73294	-0.830162	-1.32597	0.691	0.310479	T227
R.SGS(phos)PTTPPM(ox)AFLR.Y	Q9VLD6	borr	Borealin OS=Drosophila melanogaster OX=7227 GN=borr PE=1 SV=1	-3.02656	-3.76066	-4.05777	-4.18263	-3.99226	-4.14539	-5.04455	-4.60462	0.69	0.0862696	S221
R.LLPNEQASNS(phos)C(cam)PSLK.Q	B7Z0I8	CG14896	Uncharacterized protein OS=Drosophila melanogaster OX=7227 GN=CG14896 PE=1 SV=1	-6.25773	-6.01238	-6.27924	-6.22017	-6.69936	-6.76406	-6.77712	-7.28595	0.689	0.0085629	S128
R.YHYS(phos)RS(phos)PMGQGVPLDHR.R	Q7KMJ6	nito	RNA-binding protein spenito OS=Drosophila melanogaster OX=7227 GN=nito PE=1 SV=1	-7.9186	-7.6117	-7.35559	-6.85766	-8.86648	-8.16347	-7.38844	-8.0813	0.689	0.102162	S202,S204
R.SNISFATS(phos)PGGSS(phos)PHELNR.S	Q9VWS2	Nup35	Nucleoporin Nup35 OS=Drosophila melanogaster OX=7227 GN=Nup35 PE=1 SV=1	-1.432	-1.67407	-1.60762	-1.5552	-2.3051	-2.17971	-2.25228	-2.28779	0.689	0.00208056	S54,S59
K.VIKDISPT(phos)KS(phos)DTTDNVLNFVDVR.Q	B7Z0D7	Dmel\CG7504	Uncharacterized protein isoform B OS=Drosophila melanogaster OX=7227 GN=Dmel\CG7504 PE=4 SV=1	0.595449	0.187569	-0.426666	0.111246	-0.179956	-2.16306	0.152543	-0.0990115	0.689	0.240822	T693,S695
K.SQDDAPKPEAGSTS(phos)DEDLANESDVQGFDFK.V	Q09332	Ugt	UDP-glucose:glycoprotein glucosyltransferase OS=Drosophila melanogaster OX=7227 GN=Ugt PE=1 SV=2	-8.37384	-8.03446	-8.70996	-8.21241	-8.99843	-9.24171	-8.83778	-9.0014	0.687	0.0113577	S261
K.SSDASHN(d)GVSDVGGS(phos)HNNLK.V	X2J7M7	Dmel\CG4658	Uncharacterized protein isoform E OS=Drosophila melanogaster OX=7227 GN=Dmel\CG4658 PE=1 SV=1	-0.490238	-2.05357	-0.861014	-1.51086	-2.68473	-2.03133	-1.53591	-1.4097	0.686	0.154836	S46
K.ESLLHTS(phos)K.Q	Q9VG01	Dmel\CG46280	RE12073p OS=Drosophila melanogaster OX=7227 GN=Dmel\CG46280 PE=1 SV=1	-5.03603	-5.21802	-4.94645	-4.76039	-5.65327	-5.88075	-5.63608	-5.53214	0.685	0.00549873	S189
N.VLIGAGTHLLDES(phos)S(phos)DEEPPR.G	Q95SH7	Dmel\CG14969	GH26007p OS=Drosophila melanogaster OX=7227 GN=Dmel\CG14969 PE=1 SV=1	-1.61861	-2.51085	-4.97055	-7.10471	-7.06888	-2.40912	-2.61647	-6.84915	0.685	0.68609	S284,S285
R.NINDEDLTS(phos)PLKELNGQ(d)SPVQ(d)LSVDEIVAAMNSEDQER.Q	P52295	Pen	Importin subunit alpha OS=Drosophila melanogaster OX=7227 GN=Pen PE=1 SV=2	-6.24506	-7.87595	-9.3336	-7.23971	-8.56991	-8.53166	-9.21684	-7.11628	0.685	0.375173	S57
K.YAIDSPGS(phos)PSQYDIPPEDYALR.E	Q9VWD0	parvin	GH23568p OS=Drosophila melanogaster OX=7227 GN=parvin PE=1 SV=2	-3.75062	-3.94969	-3.75393	-3.38948	-4.01878	-4.41816	-4.50399	-4.63416	0.683	0.0137712	S58
R.SHS(phos)DVINSNEHPTTQAEFNR.N	Q9VTS3	Grip163	Grip163 OS=Drosophila melanogaster OX=7227 GN=Grip163 PE=1 SV=2	-2.39901	-3.25174	-3.88751	-4.13399	-3.76306	-4.06072	-4.13476	-4.44691	0.683	0.128574	S754
K.K(ac)ETEEHS(phos)EN(d)DKDLTTEK.S	Q9U7E6	Akap200	Delta-A kinase anchor protein 200 OS=Drosophila melanogaster OX=7227 GN=Akap200 PE=2 SV=1	-7.37785	-7.44553	-7.33792	-7.71007	-8.38796	-8.15291	-8.28559	-7.77458	0.682	0.0103892	S70
R.RDS(phos)LPVSHLS(phos)MR.D	Q9VV52	RAF2	LD37257p OS=Drosophila melanogaster OX=7227 GN=RAF2 PE=1 SV=3	-3.16293	-2.98707	-3.12898	-2.9021	-3.74887	-3.54291	-3.64767	-3.96931	0.682	0.00473717	S911,S918
R.QPLS(phos)DDERDDDDNTKMDVDS(phos)PLGR.T	A0A0B4LF82	Sin3A	Sin3A isoform H OS=Drosophila melanogaster OX=7227 GN=Sin3A PE=1 SV=1	-3.4505	-3.17104	-7.23626	-7.82891	-7.5669	-3.7644	-9.20116	-3.87813	0.681	0.694756	S1318,S1334
K.ASAFQFS(phos)DDEEEVK.R	A0A0B4LFL2	eIF3c	Eukaryotic translation initiation factor 3 subunit C OS=Drosophila melanogaster OX=7227 GN=eIF3c PE=3 SV=1	-7.24071	-7.01156	-6.89263	-7.00951	-6.82306	-7.07351	-7.02195	-9.95392	0.68	0.359919	S35
K.ENS(phos)SDSLASGSQK.S	Q29R25	CG6718	RE23733p OS=Drosophila melanogaster OX=7227 GN=CG6718 PE=2 SV=1	-2.41667	-2.2263	-2.25193	-2.16192	-2.83727	-3.06973	-3.03802	-2.82985	0.68	0.00320871	S524
R.GIS(phos)PQS(phos)DEGSR.S	M9PDH1	E(bx)	Enhancer of bithorax isoform H OS=Drosophila melanogaster OX=7227 GN=E(bx) PE=1 SV=1	-2.78959	-2.06568	-2.24457	-1.98977	-2.88083	-3.72803	-2.6915	-2.50936	0.68	0.0733106	S53,S56
K.LAKEEMLSC(cam)S(phos)FNS(phos)PNGKR	Q960Z0	Klp10A	Kinesin-like protein Klp10A OS=Drosophila melanogaster OX=7227 GN=Klp10A PE=1 SV=1	-8.92485	-5.90405	-8.24742	-7.59041	-8.5085	-8.27353	-8.76683	-7.83641	0.68	0.315185	S798,S801
K.QEES(phos)DEEFFDLDDIKAETSFR.L	Q9VCC0	CHORD	Cysteine and histidine-rich domain-containing protein OS=Drosophila melanogaster OX=7227 GN=CHORD PE=1 SV=1	-7.84792	-5.84442	-6.74566	-5.93337	-6.85919	-6.14271	-6.34476	-9.73944	0.679	0.464724	S325
R.NDDWS(phos)DEDEKPEKS(phos)LPAN(d)DLDDEDDDEAPLASKPAAK.K	F6J9M9	CG1703	CG1703 (Fragment) OS=Drosophila melanogaster OX=7227 GN=CG1703 PE=4 SV=1	-1.17754	-0.963842	-0.889449	-3.17134	-1.02151	-3.29303	-3.53898	-1.06487	0.679	0.427027	S9,S18
R.TS(phos)ESETDLDK.T	Q9W2U7	nocte	LP18708p OS=Drosophila melanogaster OX=7227 GN=nocte PE=1 SV=4	-5.02516	-4.63466	-4.40324	-5.00083	-5.28232	-5.40311	-5.67616	-5.41471	0.678	0.0131802	S1242
M.S(ac)DSAVATS(phos)ASPVAAPPATVEKK.V	C4IY08	His1:CG33852-RA	FI07715p (Fragment) OS=Drosophila melanogaster OX=7227 GN=His1:CG33852-RA PE=2 SV=1	-1.10419	-3.83126	-1.68028	-1.49638	-1.25588	-4.15853	-1.27006	-4.1389	0.678	0.497415	S15
K.LNSHVTS(phos)PSK.Q	Q9VAH7	yata	RE62393p OS=Drosophila melanogaster OX=7227 GN=yata PE=1 SV=1	-2.55645	-2.00613	-1.64592	-1.38993	-2.11757	-3.00897	-1.93111	-3.25391	0.678	0.131282	S766
K.EAS(phos)PVSMAS(phos)PAKDELTQEINAQGEK.V	P28668	GluProRS	Bifunctional glutamate/proline--tRNA ligase OS=Drosophila melanogaster OX=7227 GN=GluProRS PE=1 SV=2	-5.50983	-5.9572	-6.00586	-5.77583	-6.39784	-6.5643	-6.56536	-6.42797	0.677	0.00591473	S1111,S1117
K.VLEAVEAADS(phos)ISDSR.H	A1Z784	ACC	Acetyl-CoA carboxylase isoform A OS=Drosophila melanogaster OX=7227 GN=ACC PE=1 SV=1	-8.85386	-8.31059	-8.79692	-8.93861	-8.94567	-9.14788	-10.4941	-9.02	0.677	0.118314	S1399
K.IGEAVSTRS(phos)S(phos)DEAKESDLK.T	Q8T080	Smg5	LD22235p OS=Drosophila melanogaster OX=7227 GN=Smg5 PE=2 SV=1	-1.71361	-1.08493	-0.391672	-0.687036	-1.68714	-1.74042	-1.47941	-1.67924	0.677	0.0561914	S254,S255
K.S(phos)PIAVVADVS(phos)GPAEPTRSPAPIAEEDSGSAHDTR.A	Q9VID9	BEST:LD19244	Uncharacterized protein isoform B OS=Drosophila melanogaster OX=7227 GN=BEST:LD19244 PE=1 SV=3	-2.75549	-2.73422	-2.54574	-2.41983	-1.92289	-3.8086	-2.52978	-4.90232	0.677	0.312595	S2601,S2610
K.KELAEDSKDS(phos)DSKPEDK.Q	A0A0B4KEI5	Ars2	Arsenic resistance protein 2 isoform E OS=Drosophila melanogaster OX=7227 GN=Ars2 PE=1 SV=1	-0.0678794	-4.23676	-0.599098	-0.786304	-0.8657	-1.05795	-1.34547	-5.12746	0.677	0.609925	S349
K.DVDQS(phos)PPR.R	Q9VC60	anon-WO0118547.376	GH07383p OS=Drosophila melanogaster OX=7227 GN=anon-WO0118547.376 PE=2 SV=1	2.10087	1.93229	2.20143	1.90347	1.94087	1.36697	1.04713	1.07602	0.677	0.0256526	S365
R.QS(phos)PMQQNQPFR.K	Q6AWQ1	SRm160	RE71183p OS=Drosophila melanogaster OX=7227 GN=SRm160 PE=2 SV=1	-1.08996	-2.45404	-1.94691	-2.03789	-0.693194	-1.88764	-2.16653	-5.48832	0.677	0.510508	S501
K.SQS(phos)PGNLLR.S	Q0KHR5	RhoGAP15B	Rho GTPase activating protein at 15B isoform B OS=Drosophila melanogaster OX=7227 GN=RhoGAP15B PE=1 SV=1	-1.91217	-1.73562	-1.6029	-1.71928	-2.98392	-1.54443	-3.31286	-1.83345	0.676	0.148726	S196
R.SDS(phos)GKS(phos)TDSKIPYLSQPLYDLK.Q	Q8T6B9	hfp	Poly(U)-binding-splicing factor half pint OS=Drosophila melanogaster OX=7227 GN=hfp PE=1 SV=2	-5.44318	-5.5924	-5.30245	-5.4664	-5.715	-5.44007	-6.52821	-6.82579	0.676	0.080023	S33,S36
R.DVSGEALQDADEASST(phos)PTGR.R	X2JDP6	Ndf	Uncharacterized protein isoform C OS=Drosophila melanogaster OX=7227 GN=Ndf PE=4 SV=1	-4.91066	-4.62746	-4.92746	-2.73411	-4.93147	-5.07779	-4.94735	-4.94611	0.676	0.215784	T257
K.RLS(phos)TSST(phos)PESIR.S	Q9W396	HP1b	FI06908p OS=Drosophila melanogaster OX=7227 GN=HP1b PE=1 SV=1	-3.28733	-3.19744	-2.93868	-4.07542	-3.94065	-4.74818	-3.52977	-3.97497	0.674	0.0932937	S67,T71
R.RIS(phos)SGPIALNASNQSLNSVGRPVSAPS(phos)EGTNNSAYVTPSAR.K	E3CTN8	Mbs-RA	MIP27266p OS=Drosophila melanogaster OX=7227 GN=Mbs-RA PE=2 SV=1	0.330307	0.122354	0.0348198	0.095398	1.05742	0.652272	-4.18206	0.360124	0.674	0.566902	S679,S703
R.SST(phos)GSC(cam)SSLITQSR.D	E1JJD6	tyf	Twenty-four isoform F OS=Drosophila melanogaster OX=7227 GN=tyf PE=1 SV=2	-1.59832	-1.75509	-1.86558	-2.05902	-2.84804	-2.3577	-2.54516	-2.22464	0.674	0.0124506	T198
K.FS(phos)ISSESIASQTINPNVWGNELEADAPHGGC(cam)LTSR.D	Q9VW22	l(3)76BDm	FI18195p1 OS=Drosophila melanogaster OX=7227 GN=l(3)76BDm PE=1 SV=2	-4.04519	-3.74111	-5.78464	-3.79937	-5.29405	-6.90311	-3.40807	-4.45743	0.673	0.434416	S320
R.SKS(phos)FVSNHPTSPVANNER.R	O76931	l(3)mbt	Tumor-supressor protein OS=Drosophila melanogaster OX=7227 GN=l(3)mbt PE=2 SV=1	-1.75232	-2.0356	-1.69025	-2.22419	-3.63075	-2.3514	-2.3913	-2.01583	0.672	0.109196	S434
R.ENS(phos)SEMEFR.G	A0A1B2AKI4		GEO08417p1 (Fragment) OS=Drosophila melanogaster OX=7227 PE=2 SV=1	-6.64194	-6.32522	-6.70304	-6.54314	-7.18857	-7.3268	-7.12913	-7.25809	0.672	0.00392933	S81
K.DGPDQESMPLPADN(d)GES(phos)PSK.Q	Q541C9	Ts	RE18955p OS=Drosophila melanogaster OX=7227 GN=Ts PE=1 SV=1	-3.69786	-6.46577	-3.73523	-4.55036	-5.91782	-5.50014	-5.1071	-4.60755	0.671	0.339093	S25
R.SSNNSSPQMQSSSPS(phos)PASSNHANDPADVK.L	Q8T0E7	Dmel\CG10984	LD07457p OS=Drosophila melanogaster OX=7227 GN=Dmel\CG10984 PE=1 SV=1	1.78576	3.98241	3.97163	3.65841	2.55799	2.46607	3.72488	1.96625	0.671	0.300296	S322
K.ELDT(phos)IKEGSDEADSTGEAEQAQSDEKPSK.K	Q9I7K6	CG8223	Protein NASP homolog OS=Drosophila melanogaster OX=7227 GN=CG8223 PE=1 SV=1	-3.13052	-2.84464	-2.95061	-2.96718	-4.05325	-3.40602	-4.02502	-3.09144	0.671	0.0359621	T175
R.NT(phos)PVDISAGDDISR.S	Q9W074	HBS1	FI04779p OS=Drosophila melanogaster OX=7227 GN=HBS1 PE=1 SV=2	-3.8867	-4.49057	-3.775	-4.30516	-4.9269	-5.02069	-4.78517	-4.40812	0.671	0.025755	T205
K.S(phos)RRSS(phos)VGIGVEQHTVDVGQGAER.F	A1Z9I5	tum	FI24033p1 OS=Drosophila melanogaster OX=7227 GN=tum PE=1 SV=1	-4.51114	-3.92521	-4.53719	-4.36354	-4.93147	-4.86898	-5.12086	-5.09424	0.67	0.0107157	S215,S219
K.NVGVAPKPIEDS(phos)GAHEVK.D	A8JQY2	anon-87Ab	Uncharacterized protein isoform C OS=Drosophila melanogaster OX=7227 GN=anon-87Ab PE=1 SV=1	0.731908	0.411548	0.886422	0.703875	-0.111876	-0.000712152	0.278014	-0.111941	0.67	0.00787895	S454
M(ac)NNDSHKYS(phos)DAEEDEEDLR.S	Q9VTL5	RIOK1	Serine/threonine-protein kinase RIO1 OS=Drosophila melanogaster OX=7227 GN=RIOK1 PE=2 SV=1	0.356528	1.34376	1.29928	1.59517	-0.334133	-0.0381715	1.04713	1.25285	0.667	0.184724	S10
K.RNS(phos)AADSS(phos)DHVDSEEEKIPEEK.F	X2JC55	Cds	Phosphatidate cytidylyltransferase OS=Drosophila melanogaster OX=7227 GN=Cds PE=1 SV=1	-6.57538	-5.55778	-5.84574	-5.35073	-6.89805	-6.42019	-6.29191	-6.38717	0.667	0.0638114	S31,S36
K.TPPQDDAAEEVEEES(phos)AQEPT(phos)PK.K	P25171	Rcc1	Regulator of chromosome condensation OS=Drosophila melanogaster OX=7227 GN=Rcc1 PE=1 SV=2	-9.29727	-7.065	-7.98144	-8.07294	-9.35836	-7.98121	-9.4657	-8.27989	0.667	0.267267	S527,T532
R.TPIPEVSEVSS(phos)PIR.L	Q8MLV1	LBR	Lamin-B receptor OS=Drosophila melanogaster OX=7227 GN=LBR PE=1 SV=1	-4.71448	-4.88199	-5.13513	-4.74661	-4.59768	-7.1432	-5.39964	-5.00278	0.666	0.250928	S146
R.LSSSRT(phos)S(phos)LSSSR.Q	P13496	DCTN1-p150	Dynactin subunit 1 OS=Drosophila melanogaster OX=7227 GN=DCTN1-p150 PE=1 SV=2	-7.25588	-7.01907	-7.58339	-7.31091	-10.213	-7.82499	-7.0817	-6.71306	0.666	0.393827	T110,S111
K.TSPQPLS(phos)PEK.T	Q9VU84	Abp1	Drebrin-like protein OS=Drosophila melanogaster OX=7227 GN=Abp1 PE=1 SV=1	-1.29101	-2.1278	-1.5982	-1.41695	-1.78202	-2.2483	-2.96381	-2.10091	0.665	0.0701821	S243
R.LSELDKDISASDTGQQSS(phos)SDLDTPR.S	A1ZBE8	CG15099	Protein dopey-1 homolog OS=Drosophila melanogaster OX=7227 GN=CG15099 PE=1 SV=1	-2.98646	-5.61357	-3.17024	-3.02144	-3.20137	-6.54117	-2.49203	-5.21403	0.664	0.539633	S634
M(ac)MNEDS(phos)SAAGGGGVKK.F	A0A140SRF8	Dmel\CG11857	Uncharacterized protein isoform C OS=Drosophila melanogaster OX=7227 GN=Dmel\CG11857 PE=1 SV=1	-5.67849	-5.43333	-5.60792	-5.33004	-6.39784	-5.74242	-6.12546	-6.43836	0.664	0.0162151	S7
R.EES(phos)VDQEPEEDPPKLEAPPR.K	Q500Y6		SD07352p OS=Drosophila melanogaster OX=7227 PE=2 SV=1	-1.05843	-1.75509	-1.07621	-1.43065	-1.58906	-1.39439	-1.50927	-3.4766	0.662	0.221013	S250
K.RNPPGDVDGS(phos)ETDVSS(phos)	A4VCL2	CG31145	Extracellular serine/threonine protein CG31145 OS=Drosophila melanogaster OX=7227 GN=CG31145 PE=2 SV=1	0.330307	0.556843	1.12544	0.350345	-0.260369	0.278567	-0.151443	-0.151439	0.662	0.0285964	S975,S981
K.NTSSES(phos)PVAK.K	Q24574	Usp47	Ubiquitin carboxyl-terminal hydrolase 47 OS=Drosophila melanogaster OX=7227 GN=Usp47 PE=1 SV=2	-4.1476	-5.82783	-4.94168	-4.96317	-6.1539	-5.40311	-5.97623	-4.99127	0.661	0.156201	S220
K.SGS(phos)AC(cam)ST(phos)PTKDTLK.G	O61307	Ten-m	Teneurin-m OS=Drosophila melanogaster OX=7227 GN=Ten-m PE=1 SV=2	0.711736	0.874562	0.640126	0.253703	-0.190194	-0.212773	-0.0113468	0.25327	0.66	0.0145276	S175,T179
R.GGTS(phos)PLKKEEQAEK.F	Q9VAN8	Dmel\CG11882	FI15955p1 OS=Drosophila melanogaster OX=7227 GN=Dmel\CG11882 PE=1 SV=1	-5.37257	-4.64189	-5.39075	-5.01728	-6.03104	-5.82382	-5.62297	-5.58308	0.66	0.0237125	S181
M(ac)NS(phos)PSAIAVK.A	Q9VZ62	feo	Fascetto OS=Drosophila melanogaster OX=7227 GN=feo PE=1 SV=1	-6.24506	-5.10375	-9.16394	-5.0228	-5.77127	-5.57451	-11.4748	-5.34956	0.659	0.694503	S4
K.NS(phos)PAT(phos)PVYQETAPGPR.Q	Q9VDK7	Srp72	Signal recognition particle subunit SRP72 OS=Drosophila melanogaster OX=7227 GN=Srp72 PE=1 SV=1	-3.5679	-3.69901	-3.46322	-3.54771	-4.20553	-3.94995	-3.96174	-4.79835	0.659	0.0237152	S621,T624
R.RRT(phos)GS(phos)FGSTTVR.I	A0A0B4K7Y7	larp	La related protein isoform G OS=Drosophila melanogaster OX=7227 GN=larp PE=1 SV=1	-6.89753	-6.37257	-6.58971	-6.76959	-8.26744	-6.90606	-7.03405	-7.05907	0.659	0.0896247	T1574,S1576
R.RAGT(phos)AT(phos)PQPGNTST(phos)PRPPSAGPQPPPPSTHSQTASSPLSPTR.H	P08928	Lam	Lamin Dm0 OS=Drosophila melanogaster OX=7227 GN=Lam PE=1 SV=4	-6.03415	-6.05037	-6.20875	-6.94726	-6.99045	-7.21094	-6.94649	-6.72573	0.658	0.0358597	T11,T13,T21
K.LNQLPS(phos)PTNSPYLC(cam)R.Q	M9PEG6	ZnT63C	Zinc transporter 63C isoform F OS=Drosophila melanogaster OX=7227 GN=ZnT63C PE=1 SV=1	-1.84489	-1.26867	-0.918456	-1.07818	-1.66318	-0.935084	-4.24096	-0.898815	0.657	0.41026	S390
K.RS(phos)SSQADSTTSPSTSAGQNMDLEPSNN	Q9V3C7	I-2	Inhibitor-2 OS=Drosophila melanogaster OX=7227 GN=I-2 PE=1 SV=1	-3.82647	-2.82393	-3.03704	-3.59013	-2.27573	-2.09833	-10.1062	-1.42253	0.656	0.736905	S181
R.IPS(phos)TLDNVDLFSPDLEVATSAQR.S	Q9V3W9	Rad23	DNA repair protein Rad23 OS=Drosophila melanogaster OX=7227 GN=Rad23 PE=1 SV=1	-7.53556	-8.20825	-9.05274	-8.45967	-7.88036	-9.19765	-9.79009	-9.01377	0.656	0.213482	S318
K.SQPSS(phos)PPTGS(phos)PMDK.I	Q9U5L1	Gtp-bp	Signal recognition particle receptor subunit alpha homolog OS=Drosophila melanogaster OX=7227 GN=Gtp-bp PE=1 SV=2	-5.50228	-4.6675	-4.69689	-5.00083	-6.16463	-5.54545	-5.54051	-5.2365	0.655	0.0538264	S175,S180
K.YNQQNS(phos)SNLNAC(cam)MGSTDPNKVVEK.I	Q9VI56	Dmel\CG1943	GEO05313p1 OS=Drosophila melanogaster OX=7227 GN=Dmel\CG1943 PE=1 SV=1	-3.21295	-3.30386	-3.68253	-3.19453	-3.90199	-3.83473	-4.38022	-3.89412	0.654	0.0152098	S52
K.TLSS(phos)ESLNSQSDDGYPAQPSGVPGAPGAK.E	M9NDH7	milt	Milton isoform D OS=Drosophila melanogaster OX=7227 GN=milt PE=4 SV=1	0.628104	2.59247	0.736317	1.35676	1.25901	0.903438	-0.415478	0.951054	0.654	0.27042	S673
K.SQAPDKQTNSSES(phos)PSK.S	A1Z909	Nol1Nt	LD11307p OS=Drosophila melanogaster OX=7227 GN=Nol1Nt PE=1 SV=1	-8.13534	-7.45825	-8.91168	-7.44094	-6.9565	-9.05977	-8.92523	-9.61926	0.654	0.332941	S756
R.RPS(phos)S(phos)VAEKENQPSGAGK.K	Q9VEH0	alt	Aluminum tubes isoform A OS=Drosophila melanogaster OX=7227 GN=alt PE=1 SV=1	-0.601936	-0.426188	-0.221155	-0.566164	-1.20656	-1.19507	-1.09858	-0.928243	0.653	0.00573989	S130,S131
R.IS(phos)PPLQTPPSSASSHR.E	Q95R71	KrT95D	Krueppel target at 95D isoform D OS=Drosophila melanogaster OX=7227 GN=KrT95D PE=1 SV=1	-2.56627	-2.48622	-2.62004	-3.33178	-3.86653	-3.00897	-4.14644	-2.5939	0.653	0.143851	S643
K.TVTSGS(phos)SEKPSTSSSAAAAGAGGR.I	Q7K159	mip40	LD06557p OS=Drosophila melanogaster OX=7227 GN=mip40 PE=1 SV=1	1.40102	1.01772	0.843871	0.0631709	0.593608	0.288688	-0.306621	0.137863	0.653	0.0918367	S75
R.QVALNELNKS(phos)ER.F	Q8INM3	sle	Protein slender lobes OS=Drosophila melanogaster OX=7227 GN=sle PE=1 SV=1	-6.70649	-6.81724	-6.67901	-6.63829	-6.9288	-7.29357	-7.81683	-7.41537	0.653	0.0194264	S815
K.TEPGLHS(phos)PSC(cam)K.E	M9PD50	skd	Mediator of RNA polymerase II transcription subunit 13 OS=Drosophila melanogaster OX=7227 GN=skd PE=1 SV=1	-0.362846	-0.18752	-1.12271	-0.834063	-1.74131	-1.69185	-1.18328	-0.501727	0.653	0.106265	S910
K.KS(phos)PSVVVVDPVDDDNEPLFYSPGKR.G	A0A0H4Y1G5	hyd-RA	FI24602p1 OS=Drosophila melanogaster OX=7227 GN=hyd-RA PE=2 SV=1	-8.29858	-7.67263	-7.97362	-8.9983	-7.74863	-8.66533	-11.0284	-8.10757	0.652	0.401405	S2575
R.KLSVS(phos)SIDSVYENK.Q	B7Z0D7	Dmel\CG7504	Uncharacterized protein isoform B OS=Drosophila melanogaster OX=7227 GN=Dmel\CG7504 PE=4 SV=1	1.03763	0.496356	0.640126	0.978988	0.332661	-1.35604	0.244862	1.32177	0.652	0.260643	S438
R.KQS(phos)DFGVIAK.S	A0A0B4JCV4	tacc	Transforming acidic coiled-coil protein isoform J OS=Drosophila melanogaster OX=7227 GN=tacc PE=1 SV=1	-1.07586	0.784685	-0.221155	0.323387	0.259319	-0.781074	-0.858703	-1.4161	0.652	0.233224	S592
R.RTT(phos)KS(phos)EGDQS(phos)GVEAGAK.T	Q9VN21	lost	LD30155p OS=Drosophila melanogaster OX=7227 GN=lost PE=1 SV=1	-7.25843	-8.42373	-7.2622	-7.50135	-8.06899	-8.27353	-8.9644	-7.74334	0.651	0.120409	T346,S348,S353
K.RGGGGGDS(phos)S(phos)DEDVTTR.N	Q9VYW4	Dmel\CG1703	LD04461p OS=Drosophila melanogaster OX=7227 GN=Dmel\CG1703 PE=1 SV=1	-2.16468	-2.08404	-1.38077	-1.47729	-2.52071	-3.43238	-1.84293	-1.91268	0.65	0.151103	S47,S48
K.TGNDFANLS(phos)ANSQGTTVGFNK.S	A0A0B4K7J2	Nup358	E3 SUMO-protein ligase RanBP2 OS=Drosophila melanogaster OX=7227 GN=Nup358 PE=1 SV=1	-9.98383	-8.78513	-10.5186	-7.24486	-9.46042	-9.47604	-10.263	-9.93027	0.649	0.380956	S2503
R.SKS(phos)FVSNHPTS(phos)PVANNER.R	O76931	l(3)mbt	Tumor-supressor protein OS=Drosophila melanogaster OX=7227 GN=l(3)mbt PE=2 SV=1	1.29655	0.586162	0.669663	0.184981	-0.678707	-0.0636958	0.267048	0.616771	0.649	0.107673	S434,S442
R.TPS(phos)PMASSFMDGLSNND	Q9W1B0	gek	Serine/threonine-protein kinase Genghis Khan OS=Drosophila melanogaster OX=7227 GN=gek PE=1 SV=1	-3.82647	-3.69524	-3.55498	-3.101	-3.8086	-5.16792	-3.86014	-3.92848	0.647	0.111269	S1624
R.S(phos)ISKEPKPNDS(phos)NYRSLT(phos)PPAK.I	Q9XZ21	snama	Something that sticks like glue isoform A OS=Drosophila melanogaster OX=7227 GN=snama PE=1 SV=1	-4.75433	-4.07137	-3.88064	-3.712	-5.15387	-4.42873	-4.84102	-4.58142	0.647	0.0582045	S733,S743,T749
K.AKS(phos)PLSK.D	Q9XZ21	snama	Something that sticks like glue isoform A OS=Drosophila melanogaster OX=7227 GN=snama PE=1 SV=1	-1.67592	-1.20702	-2.31225	-2.07328	-2.33508	-2.38962	-2.48459	-2.6456	0.647	0.0445063	S812
R.T(phos)SAQQSPSGPSNAK.R	X2JDP6	Ndf	Uncharacterized protein isoform C OS=Drosophila melanogaster OX=7227 GN=Ndf PE=4 SV=1	-10.0653	-9.04563	-7.19706	-6.76402	-9.30519	-7.53723	-8.81972	-9.99748	0.647	0.475274	T224
K.NSFVY(phos)QK.L	A0A0B4LGB0	Gp150	Gp150 isoform E OS=Drosophila melanogaster OX=7227 GN=Gp150 PE=1 SV=1	-5.48727	-5.62787	-6.41816	-6.0081	-5.77127	-5.5863	-9.24068	-5.53214	0.647	0.47223	Y1010
K.TDAPAVN(d)GDAAT(phos)PK.E	Q9U7E6	Akap200	Delta-A kinase anchor protein 200 OS=Drosophila melanogaster OX=7227 GN=Akap200 PE=2 SV=1	-4.50736	-4.99786	-4.193	-4.51489	-5.35417	-5.45081	-5.15821	-4.83218	0.646	0.0295152	T50
K.ESS(phos)PTEVPPSAVSEK.L	Q9VID9	BEST:LD19244	Uncharacterized protein isoform B OS=Drosophila melanogaster OX=7227 GN=BEST:LD19244 PE=1 SV=3	-0.677076	-0.684045	-0.808485	-0.499665	-0.567764	-1.86503	-0.313189	-2.50253	0.645	0.234384	S1056
R.GHPEEYTDGMNLGEERFDS(phos)IDS(phos)DKKPR.A	Q59DP9	PMCA	Calcium-transporting ATPase OS=Drosophila melanogaster OX=7227 GN=PMCA PE=1 SV=3	-1.35339	-0.363186	-0.744754	-0.464004	-0.830576	-1.49151	-1.52063	-1.66393	0.645	0.0650303	S1087,S1090
R.RS(phos)PTNS(phos)IASSMYSSQTSLSSHTQPR.D	Q9VQ91	papi	Tudor and KH domain-containing protein homolog OS=Drosophila melanogaster OX=7227 GN=papi PE=1 SV=1	-3.97027	-4.36257	-3.35299	-4.59491	-5.3665	-3.14402	-5.15821	-5.19189	0.645	0.281634	S226,S230
S.AFQFS(phos)DDEEEVKR.V	A0A0B4LFL2	eIF3c	Eukaryotic translation initiation factor 3 subunit C OS=Drosophila melanogaster OX=7227 GN=eIF3c PE=3 SV=1	-9.5581	-8.76414	-9.37417	-9.21388	-9.68786	-10.1042	-9.68367	-10.0148	0.645	0.025083	S35
K.QQLQPLPEVSKHEEPVKS(phos)EES(phos)DKDDEDITEFR.L	Q9VVK8	cg5589	Uncharacterized protein OS=Drosophila melanogaster OX=7227 GN=cg5589 PE=3 SV=1	1.02134	1.06708	0.927754	1.31632	1.96414	1.75787	-0.925062	-1.04489	0.645	0.425121	S46,S49
R.TPT(phos)PPSDSEVLPATSSSVPAVLLASGK.N	Q9I7M5	Cdc26	Uncharacterized protein OS=Drosophila melanogaster OX=7227 GN=Cdc26 PE=1 SV=1	1.99636	-0.0324258	0.526338	0.0434833	0.0271751	0.140096	0.608525	-0.822446	0.645	0.256981	T41
R.DGHYGS(phos)RGSLSSTPAR.T	M9PE93	ens	Ensconsin isoform K OS=Drosophila melanogaster OX=7227 GN=ens PE=1 SV=1	-5.39339	-4.65281	-4.84495	-5.21176	-4.7032	-5.87351	-6.26111	-5.84103	0.644	0.122143	S238
R.KFVEWLQS(phos)AEEES(phos)ESEDEQKN(d)GE	Q9VNE2	kra	Protein krasavietz OS=Drosophila melanogaster OX=7227 GN=kra PE=1 SV=1	-5.99119	-7.79631	-7.52226	-8.98099	-6.81459	-8.79066	-8.37072	-8.88888	0.644	0.401192	S408,S413
K.DIS(phos)PTKSDTTDNVLNFVDVR.Q	B7Z0D7	Dmel\CG7504	Uncharacterized protein isoform B OS=Drosophila melanogaster OX=7227 GN=Dmel\CG7504 PE=4 SV=1	1.88367	1.44325	1.58416	1.89892	1.51675	-0.700786	1.24453	2.17226	0.644	0.307097	S691
K.SSM(ox)SDS(phos)MESLK.T	X2JAF1	lva	Lava lamp isoform D OS=Drosophila melanogaster OX=7227 GN=lva PE=4 SV=1	-6.92153	-7.05725	-6.93374	-7.19912	-7.98294	-7.38122	-7.28773	-8.03643	0.644	0.0267764	S96
R.S(phos)NEEFRPFIR.R	A0A140SRF8	Dmel\CG11857	Uncharacterized protein isoform C OS=Drosophila melanogaster OX=7227 GN=Dmel\CG11857 PE=1 SV=1	-7.64451	-8.19969	-8.03736	-7.83667	-8.33854	-8.12513	-8.35329	-9.47522	0.643	0.0892813	S106
K.SELEES(phos)DTDPQEQ	Q8IPG9	Bsg	Basigin isoform A OS=Drosophila melanogaster OX=7227 GN=Bsg PE=1 SV=1	-0.804921	-0.684045	-0.426666	-0.798096	-1.22398	-1.20072	-1.57484	-1.2844	0.643	0.00804256	S259
R.ESGDDS(phos)EDESEILEESPC(cam)GR.W	Q9Y0Y6	Madm	Nuclear receptor-binding protein homolog OS=Drosophila melanogaster OX=7227 GN=Madm PE=1 SV=1	-1.53428	-1.6195	-1.57492	-0.771697	-2.04764	-2.45567	-2.05224	-1.51568	0.643	0.0597893	S91
R.RNESSVEIVSS(phos)PQVSNFC(cam)EQPAR.L	A0A0B4KFE9	Mtor	Megator isoform B OS=Drosophila melanogaster OX=7227 GN=Mtor PE=1 SV=1	-6.45521	-7.48142	-7.55687	-6.0081	-7.65189	-7.53266	-7.55531	-7.32974	0.642	0.1326	S2104
K.RKLS(phos)YDDES(phos)PSEGTGC(cam)STGQLR.R	Q9W3D1	Caf1-180	Chromatin assembly factor 1 p180 subunit OS=Drosophila melanogaster OX=7227 GN=Caf1-180 PE=1 SV=1	2.41966	1.78414	2.01457	2.05864	1.95643	2.46383	0.362866	0.925972	0.642	0.213161	S87,S92
R.KLS(phos)YDDES(phos)PSEGTGC(cam)STGQLRR.S	Q9W3D1	Caf1-180	Chromatin assembly factor 1 p180 subunit OS=Drosophila melanogaster OX=7227 GN=Caf1-180 PE=1 SV=1	2.41966	1.78414	2.01457	2.05864	1.95643	2.46383	0.362866	0.925972	0.642	0.213161	S87,S92
K.EAAAGEDITPLADES(phos)IK.S	Q9U7E6	Akap200	Delta-A kinase anchor protein 200 OS=Drosophila melanogaster OX=7227 GN=Akap200 PE=2 SV=1	-3.9573	-3.94969	-3.25059	-3.73902	-4.14586	-4.46093	-4.81097	-4.04267	0.641	0.0405209	S118
R.SNGISGGNFS(phos)DNDHS(phos)DDDDVKQSK.D	Q9VL72	Etl1	SWI/SNF-related matrix-associated actin-dependent regulator of chromatin subfamily A containing DEAD/H box 1 homolog OS=Drosophila melanogaster OX=7227 GN=Etl1 PE=1 SV=1	-3.70002	-1.55834	-3.38502	-2.6895	-2.54679	-3.26908	-4.04238	-4.03674	0.641	0.28676	S150,S155
R.LFEDNLNDS(phos)VKLT(phos)PAK.E	Q8IRH5	CG2199	Zinc finger protein CG2199 OS=Drosophila melanogaster OX=7227 GN=CG2199 PE=1 SV=1	-7.15287	-6.19184	-5.78464	-5.923	-6.53168	-7.33076	-6.84859	-6.90711	0.641	0.104521	S177,T181
K.ETIPASS(phos)SSPSK.G	M9PIC3	ptdss1	Uncharacterized protein isoform B OS=Drosophila melanogaster OX=7227 GN=ptdss1 PE=1 SV=1	3.14095	2.87181	2.78185	2.85008	2.51924	2.20528	2.00795	2.34778	0.641	0.00959942	S481
K.RFVS(phos)EGDGGHVKPTTF.T	Q9VY91	Pdcd4	LD21074p OS=Drosophila melanogaster OX=7227 GN=Pdcd4 PE=1 SV=2	-8.93296	-8.74283	-8.723	-8.82616	-9.63798	-9.54799	-9.53181	-9.07079	0.641	0.00994421	S494
R.VNT(phos)PT(phos)PPIDQNSDDVPSR.N	Q9VHP9	Cenp-C	Centromeric protein-C isoform A OS=Drosophila melanogaster OX=7227 GN=Cenp-C PE=1 SV=4	-2.63694	-3.30529	-1.72058	-2.86442	-4.93147	-2.77174	-2.59231	-2.79607	0.641	0.32235	T998,T1000
R.GEGNNVTLVSTATSTASNNERES(phos)K.Q	Q9VQ76	tho2	LD36155p OS=Drosophila melanogaster OX=7227 GN=tho2 PE=1 SV=2	-4.94611	-4.22585	-4.68887	-4.67094	-5.66845	-5.00874	-5.24095	-5.17443	0.64	0.026984	S1352
R.SSS(phos)FQQQQGQPPVR.Q	Q6NR26	CG18490	RE33713p OS=Drosophila melanogaster OX=7227 GN=CG18490 PE=2 SV=1	-0.974325	-0.930243	-1.18479	-3.89744	-4.13791	-0.350494	-4.39129	-0.663625	0.639	0.607825	S859
K.AAWS(phos)DS(phos)DDEDLQVGDVKK.A	Q9V7P1	wcd	U3 small nucleolar RNA-associated protein 18 homolog OS=Drosophila melanogaster OX=7227 GN=wcd PE=1 SV=1	-0.834279	0.0399929	-0.385583	0.785154	-0.143026	-0.347356	-1.94125	-0.515404	0.638	0.244951	S103,S105
K.SPTPSGPPS(phos)PGR.N	D0IQK1	CG5798-RA	RH33842p OS=Drosophila melanogaster OX=7227 GN=CG5798-RA PE=2 SV=1	-0.635136	-0.202483	-0.0621907	-0.039818	-0.569991	-1.18383	0.555433	-2.29367	0.638	0.299655	S491
K.VTS(phos)SVESPVSS(phos)R.N	M9PBL6	kst	Karst isoform G OS=Drosophila melanogaster OX=7227 GN=kst PE=1 SV=1	-6.01251	-5.40228	-5.38426	-5.63382	-6.74854	-6.32823	-6.16293	-5.74123	0.637	0.0485265	S3935,S3943
R.S(phos)RS(phos)KS(phos)PIR.R	Q9VJ87	ncm	Pre-mRNA-splicing factor CWC22 homolog OS=Drosophila melanogaster OX=7227 GN=ncm PE=1 SV=3	-3.47065	-4.06164	-3.97013	-4.49556	-4.42977	-4.72519	-4.98461	-4.40302	0.636	0.0470547	S268,S270,S272
R.HRDGDDDS(phos)EES(phos)EDEDEELPAAR.T	Q9W196	Dmel\CG3356	LP03102p OS=Drosophila melanogaster OX=7227 GN=Dmel\CG3356 PE=1 SV=1	-3.22379	-0.243159	-0.199632	0.10651	-0.73755	-1.42715	-1.69407	-2.24159	0.635	0.439563	S401,S404
R.LSS(phos)FNNIENEDYK.S	X2JCN4	kug	Kugelei isoform E OS=Drosophila melanogaster OX=7227 GN=kug PE=4 SV=1	-4.48111	-3.53683	-3.58816	-2.8277	-3.90649	-3.29303	-4.67956	-5.09424	0.635	0.240052	S4588
R.HSS(phos)PTAVAVTPAK.K	Q9Y095	XRCC1	FI04011p OS=Drosophila melanogaster OX=7227 GN=XRCC1 PE=1 SV=1	-1.26279	-1.55834	-1.17076	-1.46314	-2.17064	-1.99159	-2.11397	-1.7143	0.634	0.0102925	S398
R.RQS(phos)M(ox)EQLDLIK.I	Q9NFR7	pins	Rapsynoid OS=Drosophila melanogaster OX=7227 GN=pins PE=2 SV=1	0.220379	0.389543	-0.206771	-0.013803	0.182048	0.683291	-2.60837	-0.404671	0.634	0.383059	S437
R.PFLPGGTLDDLVAES(phos)PRK.E	P23226	Map205	205 kDa microtubule-associated protein OS=Drosophila melanogaster OX=7227 GN=Map205 PE=1 SV=2	-5.01436	-6.01238	-4.46695	-5.02835	-5.90878	-6.58781	-5.66268	-4.89515	0.633	0.203157	S284
R.N(d)GIEGS(phos)PDTGELYR.Q	Q7JVP4	Br140	Bromodomain-containing protein 140kD isoform A OS=Drosophila melanogaster OX=7227 GN=Br140 PE=1 SV=1	-1.52468	-1.22388	-0.548341	-1.58043	-4.62334	0.247772	-2.00362	-1.03009	0.633	0.534728	S562
N.TS(phos)PDGGNFSR.G	Q9VK59	Dmel\CG5787	LD23647p OS=Drosophila melanogaster OX=7227 GN=Dmel\CG5787 PE=1 SV=2	-9.44712	-8.5895	-9.13751	-9.5252	-9.41361	-10.2232	-9.06723	-10.526	0.633	0.146851	S79
K.RQDS(phos)HDS(phos)VASAAS(phos)LKK.K	Q8T9C5	MRP	SD07655p OS=Drosophila melanogaster OX=7227 GN=MRP PE=2 SV=1	0.10138	-0.0161788	-0.126734	-0.566164	-2.24695	0.538132	-1.08166	-0.348506	0.633	0.300777	S944,S947,S953
K.MNLNNS(phos)GSVR.K	Q9VK59	Dmel\CG5787	LD23647p OS=Drosophila melanogaster OX=7227 GN=Dmel\CG5787 PE=1 SV=2	-6.77588	-6.56954	-6.64604	-6.76959	-7.38782	-7.08684	-7.4244	-7.38894	0.632	0.00546192	S470
E.L(ac)EPGEVSKSEGADEVDES(phos)DDDEEAPVEKPVSK.K	P13469	mod	DNA-binding protein modulo OS=Drosophila melanogaster OX=7227 GN=mod PE=1 SV=2	-8.65973	-7.02473	-6.68858	-10.819	-9.40615	-10.1539	-8.0427	-8.11422	0.631	0.541688	S130
K.N(d)DDS(phos)DEEEVVPAK.G	M9ND37	eIF5B	Eukaryotic translation initiation factor 5B isoform E OS=Drosophila melanogaster OX=7227 GN=eIF5B PE=1 SV=1	-0.364987	-0.527218	-0.0557312	-0.262687	-0.793684	-0.900177	-0.963291	-1.07749	0.631	0.00769655	S77
R.LNTDS(phos)PFK.G	Q8IQQ4	Gorab	RAB6-interacting golgin OS=Drosophila melanogaster OX=7227 GN=Gorab PE=1 SV=1	-3.67007	-3.22434	-3.33411	-2.63561	-3.80021	-4.1807	-3.4451	-3.95806	0.63	0.0561056	S186
K.VAKLS(phos)PGAS(phos)AKK.S	P54397	FK506-bp1	39 kDa FK506-binding nuclear protein OS=Drosophila melanogaster OX=7227 GN=FK506-bp1 PE=1 SV=2	-8.58118	-7.79954	-8.27597	-8.35006	-8.67028	-8.93393	-8.97103	-8.95295	0.63	0.0202296	S194,S198
R.HVRPLS(phos)NAS(phos)PDEQS(phos)ENER.S	M9PDH1	E(bx)	Enhancer of bithorax isoform H OS=Drosophila melanogaster OX=7227 GN=E(bx) PE=1 SV=1	-7.81383	-6.26814	-7.36578	-6.94097	-7.55556	-5.91008	-8.99111	-8.44597	0.629	0.39443	S2488,S2491,S2496
K.SAFELLMDDDEQDEPAAQES(phos)QS(phos)EEEEK.V	Q9NJH7	eIF5B	IF2 protein OS=Drosophila melanogaster OX=7227 GN=eIF5B PE=2 SV=1	-10.9395	-9.1934	-5.49176	-5.11419	-5.91782	-8.21014	-9.2568	-9.86718	0.628	0.691214	S112,S114
K.SSPPQQENIS(phos)PKPNKPPEQR.V	Q9V7H4	CG8370	Transmembrane protein 131 homolog OS=Drosophila melanogaster OX=7227 GN=CG8370 PE=1 SV=2	-2.93466	-0.946945	-1.22408	-1.50119	-1.8616	-2.47609	-1.94125	-2.83842	0.628	0.225225	S1259
K.SAS(phos)DESALHK.S	Q9W2M0	Rbpn-5	LD23155p OS=Drosophila melanogaster OX=7227 GN=Rbpn-5 PE=1 SV=2	-1.0378	-3.25174	-2.53672	-2.34009	-3.5233	-2.88548	-2.99515	-2.2761	0.628	0.246455	S239
R.AEPLLGGAAGAADDS(phos)ELQSLEPESR.K	X2JCI8	Msr-110	Msr-110 isoform D OS=Drosophila melanogaster OX=7227 GN=Msr-110 PE=1 SV=1	-2.57615	-3.83955	-1.94691	-3.40924	-3.56178	-4.25873	-2.62462	-3.83462	0.627	0.261591	S115
R.ASGS(phos)EDELDKLS(phos)LHR.G	Q6IDF6		RE21490p OS=Drosophila melanogaster OX=7227 PE=2 SV=1	1.18392	1.96242	1.58932	1.11096	0.744567	2.5229	-0.208462	0.283206	0.626	0.319316	S1172,S1180
K.DIVEVC(cam)PGGDTEPIEIT(phos)DDEEEEELN(d)MVHPHSHQLHPNSHAPASQSNNQR.A	Q960Z0	Klp10A	Kinesin-like protein Klp10A OS=Drosophila melanogaster OX=7227 GN=Klp10A PE=1 SV=1	-5.62826	-4.91228	-4.79676	-4.28179	-3.77534	-3.89028	-9.74649	-4.71077	0.626	0.649609	T631
K.TSLNWASHNFS(phos)K.N	P91634	Pi3K92E	PI-3 kinase OS=Drosophila melanogaster OX=7227 GN=Pi3K92E PE=1 SV=1	-2.40781	-0.805702	-4.97542	-5.60039	-0.203958	-6.88261	-4.90308	-4.30001	0.625	0.713149	S1084
K.S(phos)PGASGFTSEPVASATANR.V	X2JAM4	Svil	Supervillin isoform AE OS=Drosophila melanogaster OX=7227 GN=Svil PE=1 SV=1	2.76622	-0.51887	-1.1954	-1.61131	-4.4526	0.698554	2.65935	-1.96333	0.625	0.720503	S2215
K.QQS(phos)FGGGDEDEENSDDEDFIK.V	Q9VX34	Dmel\CG5800	RNA helicase OS=Drosophila melanogaster OX=7227 GN=Dmel\CG5800 PE=1 SV=2	-0.218443	0.212852	0.305806	0.309717	-0.554478	-0.348924	-0.122314	-0.863402	0.625	0.0283801	S570
R.AS(phos)ISKAD	A0A0B4K6K7	Ufl1	UFM1 specific ligase 1 isoform C OS=Drosophila melanogaster OX=7227 GN=Ufl1 PE=4 SV=1	-7.13874	-9.93011	-7.3812	-7.59041	-7.81131	-10.2761	-8.09245	-8.36054	0.625	0.452717	S778
R.NSSLQEAGT(phos)S(phos)PLKNTPEKWR.A	Q9VIL0	brun	Protein brunelleschi OS=Drosophila melanogaster OX=7227 GN=brun PE=1 SV=2	-1.96964	-2.07789	-3.33411	-2.32295	-3.29402	-2.62014	-2.94328	-3.34866	0.625	0.115808	T324,S325
K.ANVDS(phos)DEHGQLAEC(cam)LK.T	Q9VP27	Glg1	Golgi complex-localized glycoprotein 1 isoform A OS=Drosophila melanogaster OX=7227 GN=Glg1 PE=1 SV=2	-5.10305	-4.98401	-4.90406	-4.75578	-5.55121	-5.362	-5.68977	-5.64187	0.624	0.00667416	S946
K.SDTASPHS(phos)PLPASSQVS(phos)PSSR.P	Q8T9D1	Chro	SD06626p OS=Drosophila melanogaster OX=7227 GN=Chro PE=2 SV=1	-5.98065	-6.23494	-5.87273	-6.17027	-6.55548	-6.86527	-6.64266	-6.68806	0.623	0.00710776	S308,S317
K.QVESDPPAPVVES(phos)EPEEGEVRDEPEEPAK.V	Q8SY16	CG13730	RE13191p OS=Drosophila melanogaster OX=7227 GN=CG13730 PE=2 SV=1	0.901784	0.643069	1.22164	0.889925	1.39648	-0.184497	0.23364	-0.281242	0.623	0.153431	S365
K.SST(phos)PS(phos)PQGVPISVQVRPQK.K	Q9V7H4	CG8370	Transmembrane protein 131 homolog OS=Drosophila melanogaster OX=7227 GN=CG8370 PE=1 SV=2	-5.90893	-4.30977	-3.53688	-4.07542	-4.43951	-5.92498	-4.8834	-5.07386	0.623	0.301408	T1200,S1202
K.SLS(phos)GAPEDLEEMEIKHER.K	Q8INM3	sle	Protein slender lobes OS=Drosophila melanogaster OX=7227 GN=sle PE=1 SV=1	-8.14472	-8.06914	-8.06615	-8.18243	-8.3434	-8.35589	-9.44524	-8.8005	0.621	0.0564804	S1056
K.LQEAFTHPLEQLESSQNAQS(phos)DDDEC(cam)AQLPK.N	A4UZI0	Khc-73	Kinesin heavy chain 73 isoform C OS=Drosophila melanogaster OX=7227 GN=Khc-73 PE=1 SV=1	4.99202	5.35306	5.32481	3.76243	4.03896	3.439	4.0941	5.3745	0.621	0.270256	S1631
R.KGS(phos)SSEPAAVQPK.R	A8JNV5	Rad9	Cell cycle checkpoint control protein OS=Drosophila melanogaster OX=7227 GN=Rad9 PE=3 SV=2	-2.47097	-4.16988	-4.06553	-2.5939	-4.53023	-3.69894	-3.4772	-4.07877	0.621	0.240731	S305
R.N(d)T(phos)SPDGGNFSR.G	Q9VK59	Dmel\CG5787	LD23647p OS=Drosophila melanogaster OX=7227 GN=Dmel\CG5787 PE=1 SV=2	-6.92962	-6.94383	-6.978	-7.26305	-7.59855	-7.18024	-8.52807	-7.29347	0.621	0.0901092	T78
K.TAINFGEIS(phos)PR.K	A8DYH1	mute	Muscle wasted isoform C OS=Drosophila melanogaster OX=7227 GN=mute PE=4 SV=1	2.58681	3.17492	5.52661	4.91127	3.44944	3.1918	3.15489	3.92234	0.62	0.382393	S1476
K.SAGGN(d)GGS(phos)PAISGNSEGGR.N	Q5KTT4	dNAT1	Uncharacterized protein dNAT1 (Fragment) OS=Drosophila melanogaster OX=7227 GN=dNAT1 PE=2 SV=1	-6.94798	-8.04977	-7.7075	-7.92908	-9.96697	-9.32618	-3.84864	-9.9692	0.619	0.665161	S213
K.SINQQQYLPIS(phos)SDDEDIEDEMKPR.P	Q9VRP5	scny	Ubiquitin carboxyl-terminal hydrolase 36 OS=Drosophila melanogaster OX=7227 GN=scny PE=1 SV=3	-3.97027	-4.32424	-3.80936	-4.08984	-4.39778	-4.44743	-5.28159	-4.54449	0.619	0.0429262	S615
R.A(ac)Q(d)S(phos)LAGEGEKEKDNK.E	Q9VHC0	RnpS1	LD23870p OS=Drosophila melanogaster OX=7227 GN=RnpS1 PE=1 SV=2	-3.99658	-3.90549	-5.04026	-5.33691	-5.61599	-4.61241	-4.98881	-5.53771	0.619	0.179877	S7
R.HNDENSNSLEAC(cam)ES(phos)PSYMTHGSYK.F	Q9I7F7	Ack-like	Activated Cdc42 kinase-like OS=Drosophila melanogaster OX=7227 GN=Ack-like PE=1 SV=3	-1.98932	-1.83057	-1.76205	-2.03789	-2.90311	-2.17414	-2.70872	-2.3055	0.618	0.0230876	S925
R.RNS(phos)NSNHSTGSNHSSNGTTGAAIEEPEK.K	J9XXX0	Hel89B-RB	SD05972p1 (Fragment) OS=Drosophila melanogaster OX=7227 GN=Hel89B-RB PE=2 SV=1	-4.98246	-1.97154	-5.4848	-4.10148	-4.15118	-3.25725	-5.39406	-6.20769	0.617	0.527764	S214
R.QQDS(phos)DAEEGEDYHMEK.L	O46307	Dmel\CG11417	EG:8D8.4 protein OS=Drosophila melanogaster OX=7227 GN=Dmel\CG11417 PE=4 SV=1	-0.399677	0.858632	-0.918456	-1.31178	-1.23101	-0.271043	-0.552522	-2.18585	0.617	0.331781	S303
R.KAVIISS(phos)DEDEVVSPPETK.K	P35600	Gnf1	Replication factor C subunit 1 OS=Drosophila melanogaster OX=7227 GN=Gnf1 PE=1 SV=2	-5.67849	-5.98452	-6.37893	-5.42925	-5.79607	-7.0902	-6.60349	-6.44882	0.617	0.106769	S42
R.GHIDLQDLPTEIAS(phos)PLVDTSGS(phos)PSK.A	B7Z0I8	CG14896	Uncharacterized protein OS=Drosophila melanogaster OX=7227 GN=CG14896 PE=1 SV=1	-5.42878	-5.98452	-5.2662	-5.48916	-5.49598	-6.47393	-6.07101	-6.59219	0.616	0.0765361	S3118,S3126
M(ox)(ac)ES(phos)PTSHLVAK.D	Q9W3S4	CC28	LD46272p OS=Drosophila melanogaster OX=7227 GN=CC28 PE=2 SV=2	-0.453329	-1.07266	-0.960071	-1.16332	-6.36036	0.278567	-1.01857	0.987877	0.616	0.697685	S4
K.AHMS(phos)PPYSAGSSVK.S	Q9VB49	mrt	Martik isoform A OS=Drosophila melanogaster OX=7227 GN=mrt PE=4 SV=1	1.4687	-3.05787	0.754809	0.724628	0.944973	-1.64872	-3.86592	2.00269	0.614	0.698418	S99
R.AIGTGS(phos)DGGSGGGR.D	Q8IQV9	Nup205	Nuclear pore complex protein Nup205 OS=Drosophila melanogaster OX=7227 GN=Nup205 PE=2 SV=1	-7.56047	-6.21323	-6.72092	-7.05633	-7.08713	-7.55103	-7.17625	-8.1894	0.613	0.139892	S1482
K.ESFGS(phos)RDS(phos)LN(d)DILSETGLPTGNVAAQR.K	Q7YU85	cindr	SD08724p OS=Drosophila melanogaster OX=7227 GN=cindr PE=2 SV=1	-9.23982	-7.78025	-7.13256	-8.12427	-8.3434	-10.0078	-8.9578	-7.41947	0.613	0.376107	S408,S411
R.TPS(phos)SPSNSYHIDVDHR.L	Q7YU20	rb	AP-3 complex subunit beta OS=Drosophila melanogaster OX=7227 GN=rb PE=2 SV=1	-0.235967	-0.506438	-0.555158	-0.662576	-1.54022	-1.66426	-0.0519659	-1.15031	0.612	0.14033	S303
[truncated: 8,007 more rows]

## Sheet: Sheet1
M9PCH8	R.NIIHGS(phos)DAVESAEK.E	S122
[truncated: 29,731 more rows]
